# Supplementary material for: Phosphotyrosine profiling of curcumin-induced signaling
Source: Clin Proteomics. 2016 Jun 15;13:13. doi: 10.1186/s12014-016-9114-0 (PMC4908701; doi:10.1186/s12014-016-9114-0)
Supplement: Supplementary file 2 — 10.1186/s12014-016-9114-0 A list of phosphoPSMs identified by MASCOT and SEQUEST. [file 12014_2016_9114_MOESM2_ESM.xlsx]

## Sheet: CAL27_CURCUMIN_pTy_Replicates_C
Sathe et al., 2015. Phosphotyrosine profiling of curcumin-induced signaling
Table S1: A list of phosphoPSMs identified by MASCOT and SEQUEST
# of Phosphorylation Events detected	Peptide Sequence	Corrected Site (based on >75% phosphoRS probability)	Replicate	PSM Ambiguity	Genesymbol	Protein accession	Gene ID	Protein name	# Proteins	# Protein Groups	Protein Group Accessions	Modifications	Rank	phosphoRS Site Probabilities	Search Engine Rank	Quan Result ID	# Missing Channels	# Single-Peak Channels	Precursor Area	Quan Channel	Quan Info	Quan Usage	Curcumin/DMSO	Curcumin treated (Light)	DMSO treated (Heavy)	XCorr	IonScore	Exp Value	# Missed Cleavages	Isolation Interference [%]	Charge	m/z [Da]	MH+ [Da]	ΔM [ppm]	RT [min]	First Scan	Last Scan	Spectrum File
1	GAySLSIR	Y3;	Replicate 1	Unambiguous	YES1	NP_005424.1	7525	tyrosine-protein kinase Yes	5	1	4885661	Y3(Phospho)	1	Y(3): 100.0; S(4): 0.0; S(6): 0.0	1	2694			54760000	Light	Redundant	Not	0.997	54760000	43580000		40	0.00181533	0	12	2	473.723	946.439	-0.41	47.6	11329	11329	CAL27_CURCUMIN_pTy_R1.raw
1	GAySLSIR	Y3;	Replicate 1	Unambiguous	YES1	NP_005424.1	7525	tyrosine-protein kinase Yes	5	1	4885661	Y3(Phospho)	1	Y(3): 100.0; S(4): 0.0; S(6): 0.0	1	2694			54760000	Light	Redundant	Not	0.997	54760000	43580000		32	0.013739	0	40	2	473.723	946.439	-0.22	47.03	11178	11178	CAL27_CURCUMIN_pTy_R1.raw
1	GAySLSIR	Y3;	Replicate 1	Unambiguous	YES1	NP_005424.1	7525	tyrosine-protein kinase Yes	5	1	4885661	Y3(Phospho); R8(Label:13C(6))	1	Y(3): 100.0; S(4): 0.0; S(6): 0.0	1	2694			43580000	Heavy	Redundant	Not	0.997	54760000	43580000		29	0.0269193	0	62	2	476.733	952.459	-0.4	46.94	11156	11156	CAL27_CURCUMIN_pTy_R1.raw
1	GAySLSIR	Y3;	Replicate 1	Unambiguous	YES1	NP_005424.1	7525	tyrosine-protein kinase Yes	5	1	4885661	Y3(Phospho); R8(Label:13C(6))	1	Y(3): 100.0; S(4): 0.0; S(6): 0.0	1	2694			43580000	Heavy	Redundant	Not	0.997	54760000	43580000		38	0.00334244	0	18	2	476.733	952.459	-0.2	47.5	11302	11302	CAL27_CURCUMIN_pTy_R1.raw
1	SLyNLGGSK	Y3;	Replicate 1	Unambiguous	KRT5	NP_000415.2	3852	keratin, type II cytoskeletal 5	1	1	119395754	Y3(Phospho)	1	S(1): 0.0; Y(3): 100.0; S(8): 0.0	1	1921			20790000	Light	Redundant	Not	1.542	20790000	10700000		41	0.0015169	0	51	2	509.734	1018.46	-0.27	42.06	9836	9836	CAL27_CURCUMIN_pTy_R1.raw
1	VMVySALR	Y4;	Replicate 1	Unambiguous	APH1A	NP_001230701.1	51107	gamma-secretase subunit APH-1A isoform 4	2	1	344313186	Y4(Phospho)	1	Y(4): 99.6; S(5): 0.4	1	3459			32520000	Light	Redundant	Not	3.142	30610000	7732000		35	0.00749314	0	37	2	509.743	1018.48	-0.3	51.93	12495	12495	CAL27_CURCUMIN_pTy_R1.raw
1	SFLDSGyR	Y7;	Replicate 1	Unambiguous	VCL	NP_003364.1	7414	vinculin isoform VCL	2	1	4507877	Y7(Phospho)	1	S(1): 0.0; S(5): 0.0; Y(7): 100.0	1	3332			71020000	Light	Redundant	Not	1.369	71020000	41160000		27	0.0370644	0	56	2	512.71	1024.41	0.04	51.06	12261	12261	CAL27_CURCUMIN_pTy_R1.raw
1	SLyNLGGSK	Y3;	Replicate 1	Unambiguous	KRT5	NP_000415.2	3852	keratin, type II cytoskeletal 5	1	1	119395754	Y3(Phospho); K9(Label:13C(6))	1	S(1): 0.0; Y(3): 100.0; S(8): 0.0	1	1921			10700000	Heavy	Redundant	Not	1.542	20790000	10700000		24	0.0863104	0	37	2	512.744	1024.48	0.1	42.12	9852	9852	CAL27_CURCUMIN_pTy_R1.raw
1	VLyYMEK	Y3;	Replicate 1	Unambiguous	LSR	NP_001247419.1	51599	lipolysis-stimulated lipoprotein receptor isoform 5	5	1	386781463	Y3(Phospho)	1	Y(3): 99.6; Y(4): 0.4	1	3257			27010000	Light	Redundant	Not	2.39	25680000	8526000		41	0.00169027	0	35	2	513.224	1025.44	0.08	50.6	12137	12137	CAL27_CURCUMIN_pTy_R1.raw
1	VLyYMEK	Y3;	Replicate 1	Unambiguous	LSR	NP_001247419.1	51599	lipolysis-stimulated lipoprotein receptor isoform 5	5	1	386781463	Y3(Phospho); K7(Label:13C(6))	1	Y(3): 99.6; Y(4): 0.4	1	3257			8526000	Heavy	Redundant	Not	2.39	25680000	8526000		23	0.0993017	0	51	2	516.234	1031.46	-0.38	50.77	12183	12183	CAL27_CURCUMIN_pTy_R1.raw
1	FAVPTyAAK	Y6;	Replicate 1	Unambiguous	ADAM9	NP_003807.1	8754	disintegrin and metalloproteinase domain-containing protein 9 precursor	1	1	4501915	Y6(Phospho)	1	T(5): 0.5; Y(6): 99.5	1	3432		1	23430000	Light	Excluded by Method	Not	5.99098	13580000	1799000		28	0.0339591	0	17	2	524.249	1047.49	-0.09	51.74	12443	12443	CAL27_CURCUMIN_pTy_R1.raw
1	SyLPQTVR	Y2;	Replicate 1	Unambiguous	IL6ST	NP_001177910.1	3572	interleukin-6 receptor subunit beta isoform 3 precursor	2	1	300244535	Y2(Phospho); R8(Label:13C(6))	1	S(1): 0.4; Y(2): 99.6; T(6): 0.0	1	1904			3369000	Heavy	Redundant	Not	1	4247000	3369000		24	0.0724364	0	26	2	525.259	1049.51	-1.31	41.95	9807	9807	CAL27_CURCUMIN_pTy_R1.raw
1	yADLPGIAR	Y1;	Replicate 1	Unambiguous	DCTN2	NP_001248342.1	10540	dynactin subunit 2 isoform 3	3	1	387527974	Y1(Phospho)	1	Y(1): 100.0	1	4319			19750000	Light	Redundant	Not	6.925	18320000	2099000		30	0.0279603	0	57	2	528.25	1055.49	0.05	57.07	13867	13867	CAL27_CURCUMIN_pTy_R1.raw
1	GIVVyTGDR	Y5;	Replicate 1	Unambiguous	ATP1A1	NP_001153706.1	476	sodium/potassium-transporting ATPase subunit alpha-1 isoform d	3	1	237681111	Y5(Phospho)	1	Y(5): 99.5; T(6): 0.5	1	1567			24930000	Light	Redundant	Not	0.942	24930000	21000000		39	0.00245446	0	28	2	530.247	1059.49	-0.33	39.65	9191	9191	CAL27_CURCUMIN_pTy_R1.raw
1	GIVVyTGDR	Y5;	Replicate 1	Unambiguous	ATP1A1	NP_001153706.1	476	sodium/potassium-transporting ATPase subunit alpha-1 isoform d	3	1	237681111	Y5(Phospho)	1	Y(5): 99.5; T(6): 0.5	1	1567			24930000	Light	Redundant	Not	0.942	24930000	21000000		31	0.015169	0	17	2	530.247	1059.49	-0.1	40.18	9333	9333	CAL27_CURCUMIN_pTy_R1.raw
1	GIVVyTGDR	Y5;	Replicate 1	Unambiguous	ATP1A1	NP_001153706.1	476	sodium/potassium-transporting ATPase subunit alpha-1 isoform d	3	1	237681111	Y5(Phospho); R9(Label:13C(6))	1	Y(5): 99.5; T(6): 0.5	1	1567			21000000	Heavy	Redundant	Not	0.942	24930000	21000000		33	0.00924606	0	22	2	533.257	1065.51	0.14	40.24	9350	9350	CAL27_CURCUMIN_pTy_R1.raw
1	GIVVyTGDR	Y5;	Replicate 1	Unambiguous	ATP1A1	NP_001153706.1	476	sodium/potassium-transporting ATPase subunit alpha-1 isoform d	3	1	237681111	Y5(Phospho); R9(Label:13C(6))	1	Y(5): 99.5; T(6): 0.5	1	1567			21000000	Heavy	Redundant	Not	0.942	24930000	21000000		32	0.0128812	0	38	2	533.258	1065.51	1.17	39.71	9206	9206	CAL27_CURCUMIN_pTy_R1.raw
1	TyAICGAIR	Y2;	Replicate 1	Unambiguous	RPS21	NP_001015.1	6227	40S ribosomal protein S21	1	1	4506699	Y2(Phospho); C5(Carbamidomethyl)	1	T(1): 0.5; Y(2): 99.5	1	3211		1	10560000	Light	Excluded by Method	Not	7.03903	6651000	749900		25	0.0587431	0	54	2	552.749	1104.49	0.42	50.35	12070	12070	CAL27_CURCUMIN_pTy_R1.raw
1	VIyDFIEK	Y3;	Replicate 1	Unambiguous	WASL	NP_003932.3	8976	neural Wiskott-Aldrich syndrome protein	1	1	51702526	Y3(Phospho)	1	Y(3): 100.0	1	6255			55050000	Light	Redundant	Not	0.773	54910000	56340000		42	0.00121887	0	5	2	553.762	1106.52	-0.09	69.15	17097	17097	CAL27_CURCUMIN_pTy_R1.raw
1	VIyDFIEK	Y3;	Replicate 1	Unambiguous	WASL	NP_003932.3	8976	neural Wiskott-Aldrich syndrome protein	1	1	51702526	Y3(Phospho)	1	Y(3): 100.0	1	6255			55050000	Light	Redundant	Not	0.773	54910000	56340000		41	0.00152039	0	42	2	553.762	1106.52	0.46	68.6	16950	16950	CAL27_CURCUMIN_pTy_R1.raw
1	TyAICGAIR	Y2;	Replicate 1	Unambiguous	RPS21	NP_001015.1	6227	40S ribosomal protein S21	1	1	4506699	Y2(Phospho); C5(Carbamidomethyl); R9(Label:13C(6))	1	T(1): 0.5; Y(2): 99.5	1	3211		1	749900	Heavy	Excluded by Method	Not	7.03903	6651000	749900		24	0.081088	0	65	2	555.759	1110.51	-0.67	50.33	12064	12064	CAL27_CURCUMIN_pTy_R1.raw
1	VIyDFIEK	Y3;	Replicate 1	Unambiguous	WASL	NP_003932.3	8976	neural Wiskott-Aldrich syndrome protein	1	1	51702526	Y3(Phospho); K8(Label:13C(6))	1	Y(3): 100.0	1	6255			56340000	Heavy	Redundant	Not	0.773	54910000	56340000		37	0.00473653	0	6	2	556.772	1112.54	-0.74	69.16	17098	17098	CAL27_CURCUMIN_pTy_R1.raw
1	VIyDFIEK	Y3;	Replicate 1	Unambiguous	WASL	NP_003932.3	8976	neural Wiskott-Aldrich syndrome protein	1	1	51702526	Y3(Phospho); K8(Label:13C(6))	1	Y(3): 100.0	1	6255			56340000	Heavy	Redundant	Not	0.773	54910000	56340000		31	0.0240084	0	40	2	556.772	1112.54	-0.52	68.62	16953	16953	CAL27_CURCUMIN_pTy_R1.raw
1	ALDyYMLR	Y4;	Replicate 1	Unambiguous	TLN1	NP_006280.3	7094	talin-1	1	1	223029410	Y4(Phospho)	1	Y(4): 99.5; Y(5): 0.5	1	7435			7435000	Light	Redundant	Not	1.789	7435000	3298000		37	0.00441526	0	78	2	562.746	1124.48	0.24	76	18926	18926	CAL27_CURCUMIN_pTy_R1.raw
1	QGTyGGYFR	Y4;	Replicate 1	Unambiguous	EIF3C	NP_001273407.1	8663	eukaryotic translation initiation factor 3 subunit C isoform b	3	1	557128994	Y4(Phospho)	1	T(3): 1.0; Y(4): 99.0; Y(7): 0.0	1	2789		1	5092000	Light	Excluded by Method	Not	6.15835	3117000	401700		21	0.177401	0	49	2	564.729	1128.45	0.5	47.54	11312	11312	CAL27_CURCUMIN_pTy_R1.raw
1	ALDyYMLR	Y4;	Replicate 1	Unambiguous	TLN1	NP_006280.3	7094	talin-1	1	1	223029410	Y4(Phospho); R8(Label:13C(6))	1	Y(4): 99.5; Y(5): 0.5	1	7435			3298000	Heavy	Redundant	Not	1.789	7435000	3298000		22	0.14124	0	56	2	565.756	1130.5	-0.62	76.22	18988	18988	CAL27_CURCUMIN_pTy_R1.raw
1	ADyDTLSLR	Y3;	Replicate 1	Unambiguous	PKP3	NP_009114.1	11187	plakophilin-3	1	1	6005830	Y3(Phospho)	1	Y(3): 100.0; T(5): 0.0; S(7): 0.0	1	3750			40420000	Light	Redundant	Not	2.451	35860000	11610000		46	0.000578697	0	58	2	567.247	1133.49	-0.01	53.62	12944	12944	CAL27_CURCUMIN_pTy_R1.raw
1	GFGGQyGIQK	Y6;	Replicate 1	Unambiguous	HCLS1	NP_005326.2	3059	hematopoietic lineage cell-specific protein isoform 1	1	1	167234422	Y6(Phospho)	1	Y(6): 100.0	1	1693		1	23990000	Light	Excluded by Method	Not	43.7157	14470000	262700		56	5.39896e-05	0	61	2	567.752	1134.5	-0.34	40.43	9403	9403	CAL27_CURCUMIN_pTy_R1.raw
1	ADyDTLSLR	Y3;	Replicate 1	Unambiguous	PKP3	NP_009114.1	11187	plakophilin-3	1	1	6005830	Y3(Phospho); R9(Label:13C(6))	1	Y(3): 100.0; T(5): 0.0; S(7): 0.0	1	3750			11610000	Heavy	Redundant	Not	2.451	35860000	11610000		31	0.0153093	0	43	2	570.257	1139.51	0	53.85	13006	13006	CAL27_CURCUMIN_pTy_R1.raw
1	VEGDNIyVR	Y7;	Replicate 1	Unambiguous	EPB41L2	NP_001422.1	2037	band 4.1-like protein 2 isoform a	1	1	4503579	Y7(Phospho)	1	Y(7): 100.0	1	1752			17660000	Light	Redundant	Not	1.96	16200000	6561000		52	0.000117208	0	51	2	572.755	1144.5	-0.01	40.86	9518	9518	CAL27_CURCUMIN_pTy_R1.raw
1	IYQyIQSR	Y4;	Replicate 1	Unambiguous	DYRK1A	NP_569122.1	1859	dual specificity tyrosine-phosphorylation-regulated kinase 1A isoform 5	7	1	18765756	Y4(Phospho)	1	Y(2): 0.0; Y(4): 100.0; S(7): 0.0	1	1369			1220000000	Light	Redundant	Not	0.939	1220000000	1031000000		27	0.0418983	0	30	2	575.768	1150.53	-0.88	38.07	8764	8764	CAL27_CURCUMIN_pTy_R1.raw
1	IYQyIQSR	Y4;	Replicate 1	Unambiguous	DYRK1A	NP_569122.1	1859	dual specificity tyrosine-phosphorylation-regulated kinase 1A isoform 5	7	1	18765756	Y4(Phospho)	1	Y(2): 0.0; Y(4): 100.0; S(7): 0.0	1	1369			1220000000	Light	Redundant	Not	0.939	1220000000	1031000000		38	0.0031114	0	6	2	575.768	1150.53	-0.35	39.15	9055	9055	CAL27_CURCUMIN_pTy_R1.raw
1	IYQyIQSR	Y4;	Replicate 1	Unambiguous	DYRK1A	NP_569122.1	1859	dual specificity tyrosine-phosphorylation-regulated kinase 1A isoform 5	7	1	18765756	Y4(Phospho)	1	Y(2): 0.0; Y(4): 100.0; S(7): 0.0	1	1369			1220000000	Light	Redundant	Not	0.939	1220000000	1031000000		38	0.00314743	0	1	2	575.77	1150.53	2.62	38.61	8911	8911	CAL27_CURCUMIN_pTy_R1.raw
1	IYQyIQSR	Y4;	Replicate 1	Unambiguous	DYRK1A	NP_569122.1	1859	dual specificity tyrosine-phosphorylation-regulated kinase 1A isoform 5	7	1	18765756	Y4(Phospho); R8(Label:13C(6))	1	Y(2): 0.0; Y(4): 100.0; S(7): 0.0	1	1369			1031000000	Heavy	Redundant	Not	0.939	1220000000	1031000000		40	0.00250922	0	5	2	578.778	1156.55	-0.55	38.74	8945	8945	CAL27_CURCUMIN_pTy_R1.raw
1	IYQyIQSR	Y4;	Replicate 1	Unambiguous	DYRK1A	NP_569122.1	1859	dual specificity tyrosine-phosphorylation-regulated kinase 1A isoform 5	7	1	18765756	Y4(Phospho); R8(Label:13C(6))	1	Y(2): 0.0; Y(4): 100.0; S(7): 0.0	1	1369			1031000000	Heavy	Redundant	Not	0.939	1220000000	1031000000		38	0.00355147	0	28	2	578.778	1156.55	-0.23	38.22	8804	8804	CAL27_CURCUMIN_pTy_R1.raw
1	LNyGIPAIVK	Y3;	Replicate 1	Unambiguous	JUP	NP_002221.1	3728	junction plakoglobin	1	1	4504811	Y3(Phospho)	1	Y(3): 100.0	1	7221			4818000	Light	Redundant	Not	3.052	4534000	1179000		44	0.000890904	0	27	2	584.312	1167.62	-0.02	74.6	18555	18555	CAL27_CURCUMIN_pTy_R1.raw
1	LNyGIPAIVK	Y3;	Replicate 1	Unambiguous	JUP	NP_002221.1	3728	junction plakoglobin	1	1	4504811	Y3(Phospho)	1	Y(3): 100.0	1	7109		1	1571000	Light	Excluded by Method	Not	2.27606	1571000	547800		33	0.00926737	0	78	2	584.313	1167.62	1.13	73.96	18385	18385	CAL27_CURCUMIN_pTy_R1.raw
1	EyFTFPASK	Y2;	Replicate 1	Unambiguous	MLLT4	NP_001035089.1	4301	afadin isoform 2	3	1	90819233	Y2(Phospho)	1	Y(2): 100.0; T(4): 0.0; S(8): 0.0	1	6100			19860000	Light	Redundant	Not	5.503	17990000	2594000		28	0.0350717	0	47	2	585.249	1169.49	-0.21	67.6	16681	16681	CAL27_CURCUMIN_pTy_R1.raw
1	EyFTFPASK	Y2;	Replicate 1	Unambiguous	MLLT4	NP_001035089.1	4301	afadin isoform 2	3	1	90819233	Y2(Phospho)	1	Y(2): 100.0; T(4): 0.0; S(8): 0.0	1	6100			19860000	Light	Redundant	Not	5.503	17990000	2594000		25	0.0590142	0	17	2	585.25	1169.49	0.84	68.15	16828	16828	CAL27_CURCUMIN_pTy_R1.raw
1	IAIyELLFK	Y4;	Replicate 1	Unambiguous	RPS10	NP_001190174.1	6204	40S ribosomal protein S10	2	1	322303127	Y4(Phospho)	1	Y(4): 100.0	1	14773			15600000	Light	Redundant	Not	0.855	15390000	14290000		38	0.00291713	0	13	2	595.317	1189.63	0	121.83	31208	31208	CAL27_CURCUMIN_pTy_R1.raw
1	IAIyELLFK	Y4;	Replicate 1	Unambiguous	RPS10	NP_001190174.1	6204	40S ribosomal protein S10	2	1	322303127	Y4(Phospho); K9(Label:13C(6))	1	Y(4): 100.0	1	14773			14290000	Heavy	Redundant	Not	0.855	15390000	14290000		43	0.0010022	0	15	2	598.327	1195.65	0.11	121.82	31206	31206	CAL27_CURCUMIN_pTy_R1.raw
1	SESVVyADIR	Y6;	Replicate 1	Unambiguous	MPZL1	NP_003944.1	9019	myelin protein zero-like protein 1 isoform a precursor	2	1	4506357	Y6(Phospho)	1	S(1): 0.0; S(3): 0.9; Y(6): 99.1	1	3300			237700000	Light	Redundant	Not	1.082	237700000	174300000		45	0.000659129	0	15	2	609.774	1218.54	0.97	51.19	12295	12295	CAL27_CURCUMIN_pTy_R1.raw
1	SESVVyADIR	Y6;	Replicate 1	Unambiguous	MPZL1	NP_003944.1	9019	myelin protein zero-like protein 1 isoform a precursor	2	1	4506357	Y6(Phospho); R10(Label:13C(6))	1	S(1): 0.0; S(3): 0.9; Y(6): 99.1	1	3300			174300000	Heavy	Redundant	Not	1.082	237700000	174300000		34	0.00869457	0	44	2	612.783	1224.56	-1.12	50.84	12201	12201	CAL27_CURCUMIN_pTy_R1.raw
1	SESVVyADIR	Y6;	Replicate 1	Unambiguous	MPZL1	NP_003944.1	9019	myelin protein zero-like protein 1 isoform a precursor	2	1	4506357	Y6(Phospho); R10(Label:13C(6))	1	S(1): 0.0; S(3): 0.9; Y(6): 99.1	1	3300			174300000	Heavy	Redundant	Not	1.082	237700000	174300000		35	0.00794806	0	6	2	612.784	1224.56	-0.03	51.4	12351	12351	CAL27_CURCUMIN_pTy_R1.raw
1	HPDIyAVPIK	Y5;	Replicate 1	Unambiguous	TJP2	NP_001163886.1	9414	tight junction protein ZO-2 isoform 4	5	1	282165804	Y5(Phospho)	1	Y(5): 100.0	1	4244			83940000	Light	Redundant	Not	3.155	71980000	18110000		35	0.00774119	0	6	2	616.808	1232.61	0.34	56.61	13746	13746	CAL27_CURCUMIN_pTy_R1.raw
1	YAGEVyGMIR	Y6;	Replicate 1	Unambiguous	PI4KA	NP_477352.3	5297	phosphatidylinositol 4-kinase alpha isoform 1	1	1	348041302	Y6(Phospho)	1	Y(1): 0.0; Y(6): 100.0	1	5039		1	2583000	Light	Excluded by Method	Not	1.01235	2583000	2025000		33	0.0102438	0	51	2	619.767	1238.53	-1.04	61.33	15002	15002	CAL27_CURCUMIN_pTy_R1.raw
1	IGEGTyGTVFK	Y6;	Replicate 1	Unambiguous	CDK5	NP_001157882.1	1020	cyclin-dependent kinase 5 isoform 2	2	1	256542306	Y6(Phospho)	1	T(5): 0.6; Y(6): 98.8; T(8): 0.6	1	4028			13100000	Light	Redundant	Not	1.158	13100000	8975000		42	0.0014426	0	42	2	626.286	1251.57	-0.21	55.43	13429	13429	CAL27_CURCUMIN_pTy_R1.raw
1	SPyAGLQLGAAK	Y3;	Replicate 1	Unambiguous	TRIM29	NP_036233.2	23650	tripartite motif-containing protein 29	1	1	17402909	Y3(Phospho)	1	S(1): 0.0; Y(3): 100.0	1				5439000		No Quan Values	Not					45	0.00062827	0	39	2	628.307	1255.61	-0.74	54.82	13267	13267	CAL27_CURCUMIN_pTy_R1.raw
1	IGEGTyGTVFK	Y6;	Replicate 1	Unambiguous	CDK5	NP_001157882.1	1020	cyclin-dependent kinase 5 isoform 2	2	1	256542306	Y6(Phospho); K11(Label:13C(6))	1	T(5): 0.6; Y(6): 98.8; T(8): 0.6	1	4028			8975000	Heavy	Redundant	Not	1.158	13100000	8975000		31	0.0163786	0	48	2	629.297	1257.59	0.09	55.41	13423	13423	CAL27_CURCUMIN_pTy_R1.raw
1	VGFQYEGTyK	Y9;	Replicate 1	Unambiguous	G6PD	NP_001035810.1	2539	glucose-6-phosphate 1-dehydrogenase isoform b	2	1	108773793	Y9(Phospho)	1	Y(5): 0.0; T(8): 0.5; Y(9): 99.5	1	3469	1		7728000	Light	Excluded by Method	Not	100	4981000	5315		30	0.0194069	0	52	2	636.272	1271.54	1.09	51.99	12510	12510	CAL27_CURCUMIN_pTy_R1.raw
1	VDyVVVDQQK	Y3;	Replicate 1	Unambiguous	GAB1	NP_002030.2	2549	GRB2-associated-binding protein 1 isoform b	2	1	46370073	Y3(Phospho)	1	Y(3): 100.0	1	1394			35150000	Light	Redundant	Not	0.861	35150000	32410000		49	0.000247148	0	53	2	636.797	1272.59	-0.76	38.3	8826	8826	CAL27_CURCUMIN_pTy_R1.raw
1	VDyVVVDQQK	Y3;	Replicate 1	Unambiguous	GAB1	NP_002030.2	2549	GRB2-associated-binding protein 1 isoform b	2	1	46370073	Y3(Phospho)	1	Y(3): 100.0	1	1394			35150000	Light	Redundant	Not	0.861	35150000	32410000		55	6.8227e-05	0	4	2	636.797	1272.59	0	38.83	8967	8967	CAL27_CURCUMIN_pTy_R1.raw
1	ITLDNAyMEK	Y7;	Replicate 1	Unambiguous	PKM||PKM	NP_872270.1||NP_002645.3	5315||5315	pyruvate kinase PKM isoform b||pyruvate kinase PKM isoform a	6	2	33286420;33286418	Y7(Phospho)	1	T(2): 0.0; Y(7): 100.0	1	3851			3290000	Light	Redundant	Not	0.987	3290000	2645000		31	0.0188376	0	52	2	639.279	1277.55	1.63	54.25	13116	13116	CAL27_CURCUMIN_pTy_R1.raw
1	VDyVVVDQQK	Y3;	Replicate 1	Unambiguous	GAB1	NP_002030.2	2549	GRB2-associated-binding protein 1 isoform b	2	1	46370073	Y3(Phospho); K10(Label:13C(6))	1	Y(3): 100.0	1	1394			32410000	Heavy	Redundant	Not	0.861	35150000	32410000		53	0.000118531	0	11	2	639.807	1278.61	-0.08	38.44	8863	8863	CAL27_CURCUMIN_pTy_R1.raw
1	yMEDSTYYK	Y1;	Replicate 1	Unambiguous	PTK2	NP_722560.1	5747	focal adhesion kinase 1 isoform a	3	1	24476013	Y8(Phospho)	1	Y(1): 100.0; S(5): 0.0; T(6): 0.0; Y(7): 0.0; Y(8): 0.0	1	1087			73800000	Light	Unique	Used	0.865	73800000	67690000		33	0.00937468	0	12	2	640.233	1279.46	0.04	36.21	8258	8258	CAL27_CURCUMIN_pTy_R1.raw
1	yMEDSTYYK	Y1;	Replicate 1	Unambiguous	PTK2	NP_722560.1	5747	focal adhesion kinase 1 isoform a	3	1	24476013	Y1(Phospho)	1	Y(1): 100.0; S(5): 0.0; T(6): 0.0; Y(7): 0.0; Y(8): 0.0	1	1597			36330000	Light	Redundant	Not	1.423	36330000	20260000		59	2.3494e-05	0	3	2	640.233	1279.46	0.32	39.83	9240	9240	CAL27_CURCUMIN_pTy_R1.raw
1	QSPEDVyFSK	Y7;	Replicate 1	Unambiguous	EPHA2	NP_004422.2	1969	ephrin type-A receptor 2 precursor	1	1	32967311	Y7(Phospho)	1	S(2): 0.0; Y(7): 99.4; S(9): 0.6	1	2759			109000000	Light	Redundant	Not	1.894	108200000	45340000		42	0.00138981	0	9	2	640.266	1279.52	0.25	47.93	11417	11417	CAL27_CURCUMIN_pTy_R1.raw
1	QSPEDVyFSK	Y7;	Replicate 1	Unambiguous	EPHA2	NP_004422.2	1969	ephrin type-A receptor 2 precursor	1	1	32967311	Y7(Phospho)	1	S(2): 0.0; Y(7): 99.4; S(9): 0.6	1	2759			109000000	Light	Redundant	Not	1.894	108200000	45340000		44	0.000818383	0	27	2	640.267	1279.53	1.68	47.37	11268	11268	CAL27_CURCUMIN_pTy_R1.raw
1	yMEDSTYYK	Y1;	Replicate 1	Unambiguous	PTK2	NP_722560.1	5747	focal adhesion kinase 1 isoform a	3	1	24476013	Y8(Phospho); K9(Label:13C(6))	1	Y(1): 100.0; S(5): 0.0; T(6): 0.0; Y(7): 0.0; Y(8): 0.0	1	1087			70170000	Heavy	Redundant	Not	0.865	73800000	67690000		31	0.0148579	0	13	2	643.243	1285.48	0.05	36.67	8385	8385	CAL27_CURCUMIN_pTy_R1.raw
1	yMEDSTYYK	Y1;	Replicate 1	Unambiguous	PTK2	NP_722560.1	5747	focal adhesion kinase 1 isoform a	3	1	24476013	Y8(Phospho); K9(Label:13C(6))	1	Y(1): 100.0; S(5): 0.0; T(6): 0.0; Y(7): 0.0; Y(8): 0.0	1	1087			70170000	Heavy	Redundant	Not	0.865	73800000	67690000		30	0.0181116	0	19	2	643.243	1285.48	0.14	36.15	8242	8242	CAL27_CURCUMIN_pTy_R1.raw
1	yMEDSTYYK	Y1;	Replicate 1	Unambiguous	PTK2	NP_722560.1	5747	focal adhesion kinase 1 isoform a	3	1	24476013	Y1(Phospho); K9(Label:13C(6))	1	Y(1): 100.0; S(5): 0.0; T(6): 0.0; Y(7): 0.0; Y(8): 0.0	1	1597			20260000	Heavy	Redundant	Not	1.423	36330000	20260000		58	3.34162e-05	0	48	2	643.243	1285.48	0.14	39.88	9252	9252	CAL27_CURCUMIN_pTy_R1.raw
1	QSPEDVyFSK	Y7;	Replicate 1	Unambiguous	EPHA2	NP_004422.2	1969	ephrin type-A receptor 2 precursor	1	1	32967311	Y7(Phospho); K10(Label:13C(6))	1	S(2): 0.0; Y(7): 99.4; S(9): 0.6	1	2759			45340000	Heavy	Redundant	Not	1.894	108200000	45340000		34	0.00958018	0	9	2	643.276	1285.54	0.26	47.93	11419	11419	CAL27_CURCUMIN_pTy_R1.raw
1	QSPEDVyFSK	Y7;	Replicate 1	Unambiguous	EPHA2	NP_004422.2	1969	ephrin type-A receptor 2 precursor	1	1	32967311	Y7(Phospho); K10(Label:13C(6))	1	S(2): 0.0; Y(7): 99.4; S(9): 0.6	1	2759			45340000	Heavy	Redundant	Not	1.894	108200000	45340000		41	0.00166513	0	39	2	643.277	1285.55	1.59	47.37	11270	11270	CAL27_CURCUMIN_pTy_R1.raw
1	TTVyVVEDQR	Y4;	Replicate 1	Unambiguous	CYSTM1	NP_115788.1	84418	cysteine-rich and transmembrane domain-containing protein 1	1	1	14165278	Y4(Phospho)	1	T(1): 0.0; T(2): 0.0; Y(4): 100.0	1	1580			11160000	Light	Redundant	Not	4.365	9851000	1791000		25	0.0702257	0	55	2	645.293	1289.58	0.34	39.72	9210	9210	CAL27_CURCUMIN_pTy_R1.raw
1	AVDGyVKPQIK	Y5;	Replicate 1	Unambiguous	STAT5A	NP_001275649.1	6776	signal transducer and activator of transcription 5A isoform 3	4	1	570359557	Y5(Phospho)	1	Y(5): 100.0	1	1294		1	6892000	Light	Excluded by Method	Not	2.07108	3656000	1401000		29	0.0255245	0	48	3	433.222	1297.65	-2.6	37.6	8636	8636	CAL27_CURCUMIN_pTy_R1.raw
1	AVDGyVKPQIK	Y5;	Replicate 1	Unambiguous	STAT5A	NP_001275649.1	6776	signal transducer and activator of transcription 5A isoform 3	4	1	570359557	Y5(Phospho)	1	Y(5): 100.0	1	1281			21950000	Light	Redundant	Not	4.02	19650000	3878000		22	0.11349	0	49	2	649.33	1297.65	-2.57	37.53	8616	8616	CAL27_CURCUMIN_pTy_R1.raw
1	WDTGENPIyK	Y9;	Replicate 1	Unambiguous	ITGB1	NP_596867.1	3688	integrin beta-1 isoform 1A precursor	1	1	19743823	Y9(Phospho)	1	T(3): 0.0; Y(9): 100.0	1	4012			62240000	Light	Redundant	Not	5.241	60390000	9144000		45	0.000566183	0	42	2	651.774	1302.54	-0.31	55.33	13403	13403	CAL27_CURCUMIN_pTy_R1.raw
1	WDTGENPIyK	Y9;	Replicate 1	Unambiguous	ITGB1	NP_596867.1	3688	integrin beta-1 isoform 1A precursor	1	1	19743823	Y9(Phospho)	1	T(3): 0.0; Y(9): 100.0	1	4012			62240000	Light	Redundant	Not	5.241	60390000	9144000		43	0.000979392	0	6	2	651.774	1302.54	-0.03	55.92	13560	13560	CAL27_CURCUMIN_pTy_R1.raw
1	WDTGENPIyK	Y9;	Replicate 1	Unambiguous	ITGB1	NP_596867.1	3688	integrin beta-1 isoform 1A precursor	1	1	19743823	Y9(Phospho); K10(Label:13C(6))	1	T(3): 0.0; Y(9): 100.0	1	4012			9144000	Heavy	Redundant	Not	5.241	60390000	9144000		36	0.00457043	0	54	2	654.784	1308.56	-0.49	55.38	13414	13414	CAL27_CURCUMIN_pTy_R1.raw
1	WDTGENPIyK	Y9;	Replicate 1	Unambiguous	ITGB1	NP_596867.1	3688	integrin beta-1 isoform 1A precursor	1	1	19743823	Y9(Phospho); K10(Label:13C(6))	1	T(3): 0.0; Y(9): 100.0	1	4012			9144000	Heavy	Redundant	Not	5.241	60390000	9144000		42	0.00139302	0	32	2	654.784	1308.56	0.63	55.99	13579	13579	CAL27_CURCUMIN_pTy_R1.raw
1	VKGEyDVTVPK	Y5;	Replicate 1	Unambiguous	AHNAK	NP_001611.1	79026	neuroblast differentiation-associated protein AHNAK isoform 1	1	1	61743954	Y5(Phospho)	1	Y(5): 100.0; T(8): 0.0	1	1619			17840000	Light	Redundant	Not	4.099	16040000	3104000		30	0.0212793	1	42	3	438.883	1314.63	-0.49	40.53	9430	9430	CAL27_CURCUMIN_pTy_R1.raw
1	VKGEyDVTVPK	Y5;	Replicate 1	Unambiguous	AHNAK	NP_001611.1	79026	neuroblast differentiation-associated protein AHNAK isoform 1	1	1	61743954	Y5(Phospho)	1	Y(5): 100.0; T(8): 0.0	1	1593			250200000	Light	Redundant	Not	3.464	248900000	57030000		25	0.0704623	1	33	2	657.821	1314.63	-0.15	40.86	9517	9517	CAL27_CURCUMIN_pTy_R1.raw
1	VKGEyDVTVPK	Y5;	Replicate 1	Unambiguous	AHNAK	NP_001611.1	79026	neuroblast differentiation-associated protein AHNAK isoform 1	1	1	61743954	Y5(Phospho)	1	Y(5): 100.0; T(8): 0.0	1	1593			250200000	Light	Redundant	Not	3.464	248900000	57030000		27	0.0404535	1	35	2	657.821	1314.63	0.03	39.81	9233	9233	CAL27_CURCUMIN_pTy_R1.raw
1	VKGEyDVTVPK	Y5;	Replicate 1	Unambiguous	AHNAK	NP_001611.1	79026	neuroblast differentiation-associated protein AHNAK isoform 1	1	1	61743954	Y5(Phospho)	1	Y(5): 100.0; T(8): 0.0	1	1593			250200000	Light	Redundant	Not	3.464	248900000	57030000		48	0.000311141	1	3	2	657.821	1314.63	0.31	40.32	9371	9371	CAL27_CURCUMIN_pTy_R1.raw
1	MKGDyDVTVPK	Y5;	Replicate 1	Unambiguous	AHNAK	NP_001611.1	79026	neuroblast differentiation-associated protein AHNAK isoform 1	1	1	61743954	Y5(Phospho)	1	Y(5): 100.0; T(8): 0.0	1	1915			80510000	Light	Redundant	Not	2.721	77100000	22480000		35	0.00606033	1	37	2	666.8	1332.59	1.4	42.03	9828	9828	CAL27_CURCUMIN_pTy_R1.raw
1	QVVESAyEVIK	Y7;	Replicate 1	Unambiguous	LDHA	NP_005557.1	3939	L-lactate dehydrogenase A chain isoform 1	3	1	5031857	Y7(Phospho)	1	S(5): 0.0; Y(7): 100.0	1	4633			4665000	Light	Redundant	Not	0.732	4665000	5055000		27	0.0436433	0	52	2	672.826	1344.65	0.44	59.02	14384	14384	CAL27_CURCUMIN_pTy_R1.raw
1	VKGEyDMTVPK	Y5;	Replicate 1	Unambiguous	AHNAK	NP_001611.1	79026	neuroblast differentiation-associated protein AHNAK isoform 1	1	1	61743954	Y5(Phospho)	1	Y(5): 100.0; T(8): 0.0	1	1728			115400000	Light	Redundant	Not	3.673	110000000	23760000		38	0.00346328	1	12	2	673.807	1346.61	0.1	40.98	9550	9550	CAL27_CURCUMIN_pTy_R1.raw
1	MVVESAyEVIK	Y7;	Replicate 1	Unambiguous	LDHB	NP_001167568.1	3945	L-lactate dehydrogenase B chain	1	1	291575128	Y7(Phospho)	1	S(5): 0.0; Y(7): 100.0	1	6199			3498000	Light	Unique	Used	0.922	3114000	2680000		23	0.112444	0	9	2	674.315	1347.62	-2.18	68.27	16861	16861	CAL27_CURCUMIN_pTy_R1.raw
1	INNyLTVPAHK	Y4;	Replicate 1	Unambiguous	SLC9A1	NP_003038.2	6548	sodium/hydrogen exchanger 1	1	1	27777632	Y4(Phospho)	1	Y(4): 100.0; T(6): 0.0	1	2681			3091000	Light	Redundant	Not	3.208	3091000	764600		51	0.000198605	0	0	2	675.334	1349.66	-0.41	46.86	11133	11133	CAL27_CURCUMIN_pTy_R1.raw
1	QVVESAyEVIK	Y7;	Replicate 1	Unambiguous	LDHA	NP_005557.1	3939	L-lactate dehydrogenase A chain isoform 1	3	1	5031857	Y7(Phospho); K11(Label:13C(6))	1	S(5): 0.0; Y(7): 100.0	1	4633			5055000	Heavy	Redundant	Not	0.732	4665000	5055000		47	0.000430508	0	27	2	675.836	1350.66	-0.01	59.08	14400	14400	CAL27_CURCUMIN_pTy_R1.raw
1	NVyYELNDVR	Y3;	Replicate 1	Unambiguous	KIAA1217	NP_001091970.1	56243	sickle tail protein homolog isoform 2	4	1	148612813	Y3(Phospho)	1	Y(3): 100.0; Y(4): 0.0	1	5114		1	4405000	Light	Excluded by Method	Not	0.892226	2299000	2045000		46	0.000538105	0	24	2	682.799	1364.59	1.11	61.91	15158	15158	CAL27_CURCUMIN_pTy_R1.raw
1	yHELPTLEER	Y1;	Replicate 1	Unambiguous	PVRL2	NP_001036189.1	5819	poliovirus receptor-related protein 2 isoform delta precursor	1	1	112789532	Y1(Phospho)	1	Y(1): 100.0; T(6): 0.0	1	3451			15170000	Light	Redundant	Not	6.159	13060000	1683000		34	0.00831681	0	55	2	683.806	1366.6	0.28	51.84	12471	12471	CAL27_CURCUMIN_pTy_R1.raw
1	QDVyGPQPQVR	Y4;	Replicate 1	Unambiguous	CTNND1	NP_001193818.1	1500	catenin delta-1 isoform 2A	15	1	332688218	Y4(Phospho)	1	Y(4): 100.0	1	879			115000000	Light	Redundant	Not	5.717	114200000	15850000		44	0.000807704	0	47	2	683.811	1366.62	0.01	34.42	7779	7779	CAL27_CURCUMIN_pTy_R1.raw
1	QDVyGPQPQVR	Y4;	Replicate 1	Unambiguous	CTNND1	NP_001193818.1	1500	catenin delta-1 isoform 2A	15	1	332688218	Y4(Phospho)	1	Y(4): 100.0	1	879			115000000	Light	Redundant	Not	5.717	114200000	15850000		41	0.00166436	0	7	2	683.812	1366.62	0.45	34.94	7919	7919	CAL27_CURCUMIN_pTy_R1.raw
1	NVyYELNDVR	Y3;	Replicate 1	Unambiguous	KIAA1217	NP_001091970.1	56243	sickle tail protein homolog isoform 2	4	1	148612813	Y3(Phospho); R10(Label:13C(6))	1	Y(3): 100.0; Y(4): 0.0	1	5114		1	2045000	Heavy	Excluded by Method	Not	0.892226	2299000	2045000		32	0.0139743	0	37	2	685.807	1370.61	-0.75	61.84	15139	15139	CAL27_CURCUMIN_pTy_R1.raw
1	SFTPDHVVyAR	Y9;	Replicate 1	Unambiguous	PTRF	NP_036364.2	284119	polymerase I and transcript release factor	1	1	42734430	Y9(Phospho)	1	S(1): 0.0; T(3): 0.0; Y(9): 100.0	1	3331			176100000	Light	Redundant	Not	4.077	175500000	34170000		31	0.0174766	0	4	2	686.308	1371.61	0.15	51.06	12260	12260	CAL27_CURCUMIN_pTy_R1.raw
1	SFTPDHVVyAR	Y9;	Replicate 1	Unambiguous	PTRF	NP_036364.2	284119	polymerase I and transcript release factor	1	1	42734430	Y9(Phospho)	1	S(1): 0.0; T(3): 0.0; Y(9): 100.0	1	3331			176100000	Light	Redundant	Not	4.077	175500000	34170000		33	0.0103111	0	2	2	686.308	1371.61	0.24	51.62	12411	12411	CAL27_CURCUMIN_pTy_R1.raw
1	SFTPDHVVyAR	Y9;	Replicate 1	Unambiguous	PTRF	NP_036364.2	284119	polymerase I and transcript release factor	1	1	42734430	Y9(Phospho)	1	S(1): 0.0; T(3): 0.0; Y(9): 100.0	1	3338			29600000	Light	Redundant	Not	4.197	28730000	5431000		35	0.00736573	0	34	3	457.875	1371.61	0.41	51.11	12273	12273	CAL27_CURCUMIN_pTy_R1.raw
1	QDVyGPQPQVR	Y4;	Replicate 1	Unambiguous	CTNND1	NP_001193818.1	1500	catenin delta-1 isoform 2A	15	1	332688218	Y4(Phospho); R11(Label:13C(6))	1	Y(4): 100.0	1	879			15850000	Heavy	Redundant	Not	5.717	114200000	15850000		26	0.0676035	0	45	2	686.821	1372.64	0.01	34.95	7921	7921	CAL27_CURCUMIN_pTy_R1.raw
1	SFTPDHVVyAR	Y9;	Replicate 1	Unambiguous	PTRF	NP_036364.2	284119	polymerase I and transcript release factor	1	1	42734430	Y9(Phospho); R11(Label:13C(6))	1	S(1): 0.0; T(3): 0.0; Y(9): 100.0	1	3331			34170000	Heavy	Redundant	Not	4.077	175500000	34170000		48	0.00039646	0	21	2	689.319	1377.63	0.25	51.26	12315	12315	CAL27_CURCUMIN_pTy_R1.raw
1	YSQNIyIQNR	Y6;	Replicate 1	Unambiguous	PKP2	NP_001005242.2	5318	plakophilin-2 isoform 2a	2	1	148664186	Y6(Phospho)	1	Y(1): 0.0; S(2): 0.6; Y(6): 99.4	1	2248			15980000	Light	Unique	Used	3.059	15560000	4037000		36	0.00579717	0	0	2	689.812	1378.62	0.56	44.03	10370	10370	CAL27_CURCUMIN_pTy_R1.raw
1	YSQNIyIQNR	Y6;	Replicate 1	Unambiguous	PKP2	NP_001005242.2	5318	plakophilin-2 isoform 2a	2	1	148664186	Y6(Phospho); R10(Label:13C(6))	1	Y(1): 0.0; S(2): 0.6; Y(6): 99.4	1	2248			4037000	Heavy	Redundant	Not	3.059	15560000	4037000		43	0.00153238	0	0	2	692.821	1384.64	0.21	44.42	10475	10475	CAL27_CURCUMIN_pTy_R1.raw
1	yFDSGDYNMAK	Y1;	Replicate 1	Unambiguous	ARPP19	NP_006619.1	10776	cAMP-regulated phosphoprotein 19	8	1	5729732	Y1(Phospho)	1	Y(1): 100.0; S(4): 0.0; Y(7): 0.0	1	3592		1	8028000	Light	Excluded by Method	Not	40.2697	4904000	96650		28	0.0326555	0	59	2	695.755	1390.5	0.24	52.72	12705	12705	CAL27_CURCUMIN_pTy_R1.raw
1	EHALLAyTLGVK	Y7;	Replicate 1	Unambiguous	EEF1A1	NP_001393.1	1915	elongation factor 1-alpha 1	2	1	4503471	Y7(Phospho)	1	Y(7): 99.5; T(8): 0.5	1	8597			23860000	Light	Redundant	Not	1.063	23860000	17810000		46	0.000719357	0	16	2	697.858	1394.71	0.31	84.33	21140	21140	CAL27_CURCUMIN_pTy_R1.raw
1	EHALLAyTLGVK	Y7;	Replicate 1	Unambiguous	EEF1A1	NP_001393.1	1915	elongation factor 1-alpha 1	2	1	4503471	T8(Phospho)	1	Y(7): 99.5; T(8): 0.5	1	8597			23860000	Light	Redundant	Not	1.063	23860000	17810000		45	0.000756143	0	14	2	697.859	1394.71	1.45	83.72	20976	20976	CAL27_CURCUMIN_pTy_R1.raw
1	yELTGLPEQDR	Y1;	Replicate 1	Unambiguous	ABL2	NP_001161711.1	27	Abelson tyrosine-protein kinase 2 isoform i	4	1	269847793	Y1(Phospho)	1	Y(1): 100.0; T(4): 0.0	1	3884			17080000	Light	Redundant	Not	4.96	16810000	2689000		41	0.00164163	0	0	2	700.808	1400.61	-0.51	54.53	13190	13190	CAL27_CURCUMIN_pTy_R1.raw
1	yATLSLFNTYK	Y1;	Replicate 1	Unambiguous	PRRC2C	NP_055987.2	23215	protein PRRC2C	1	1	115298682	Y1(Phospho)	1	Y(1): 100.0; T(3): 0.0; S(5): 0.0; T(9): 0.0; Y(10): 0.0	1	9988	1		27310000	Light	Excluded by Method	Not	100	13580000	5315		66	6.14861e-06	0	43	2	700.829	1400.65	0.21	92.7	23386	23386	CAL27_CURCUMIN_pTy_R1.raw
1	EHALLAyTLGVK	Y7;	Replicate 1	Unambiguous	EEF1A1	NP_001393.1	1915	elongation factor 1-alpha 1	2	1	4503471	T8(Phospho); K12(Label:13C(6))	1	Y(7): 99.5; T(8): 0.5	1	8597			18350000	Heavy	Redundant	Not	1.063	23860000	17810000		34	0.00799754	0	56	2	700.868	1400.73	0.14	83.71	20973	20973	CAL27_CURCUMIN_pTy_R1.raw
1	DQyLMWLTQK	Y3;	Replicate 1	Unambiguous	PIK3R1	NP_001229395.1	5295	phosphatidylinositol 3-kinase regulatory subunit alpha isoform 4	4	1	335057534	Y3(Phospho)	1	Y(3): 100.0; T(8): 0.0	1	10435			12300000	Light	Redundant	Not	0.81	12300000	12040000		33	0.0127192	0	42	2	703.315	1405.62	0.02	95.4	24111	24111	CAL27_CURCUMIN_pTy_R1.raw
1	LyDLNMPAYVK	Y2;	Replicate 1	Unambiguous	NCK1	NP_001177725.1	4690	cytoplasmic protein NCK1 isoform 2	2	1	299829184	Y2(Phospho)	1	Y(2): 100.0; Y(9): 0.0	1	8038			28900000	Light	Redundant	Not	0.772	28900000	29730000		57	5.55624e-05	0	46	2	703.825	1406.64	0.62	80	19995	19995	CAL27_CURCUMIN_pTy_R1.raw
1	LyDLNMPAYVK	Y2;	Replicate 1	Unambiguous	NCK1	NP_001177725.1	4690	cytoplasmic protein NCK1 isoform 2	2	1	299829184	Y2(Phospho)	1	Y(2): 100.0; Y(9): 0.0	1	8038			28900000	Light	Redundant	Not	0.772	28900000	29730000		25	0.0781083	0	40	2	703.826	1406.64	1.48	80.59	20152	20152	CAL27_CURCUMIN_pTy_R1.raw
1	RPGPGtLYDVPR	T6;	Replicate 1	Unambiguous	BCAR1	NP_001164190.1	9564	breast cancer anti-estrogen resistance protein 1 isoform 7	9	1	282398123	Y8(Phospho)	1	T(6): 99.6; Y(8): 0.4	1	3378			84860000	Light	Redundant	Not	1.55	84180000	43110000		35	0.00695513	0	10	3	469.898	1407.68	0	52.04	12524	12524	CAL27_CURCUMIN_pTy_R1.raw
1	RPGPGtLYDVPR	T6;	Replicate 1	Unambiguous	BCAR1	NP_001164190.1	9564	breast cancer anti-estrogen resistance protein 1 isoform 7	9	1	282398123	Y8(Phospho)	1	T(6): 99.6; Y(8): 0.4	1	3378			84860000	Light	Redundant	Not	1.55	84180000	43110000		42	0.00137726	0	25	3	469.898	1407.68	0.07	51.42	12358	12358	CAL27_CURCUMIN_pTy_R1.raw
1	RPGPGtLYDVPR	T6;	Replicate 1	Unambiguous	BCAR1	NP_001164190.1	9564	breast cancer anti-estrogen resistance protein 1 isoform 7	9	1	282398123	Y8(Phospho)	1	T(6): 99.6; Y(8): 0.4	1	3361			208700000	Light	Redundant	Not	1.584	207500000	103900000		82	1.63475e-07	0	1	2	704.343	1407.68	0.38	51.89	12485	12485	CAL27_CURCUMIN_pTy_R1.raw
1	RPGPGtLYDVPR	T6;	Replicate 1	Unambiguous	BCAR1	NP_001164190.1	9564	breast cancer anti-estrogen resistance protein 1 isoform 7	9	1	282398123	T6(Phospho)	1	T(6): 99.6; Y(8): 0.4	1	3361			208700000	Light	Redundant	Not	1.584	207500000	103900000		41	0.00191729	0	12	2	704.343	1407.68	0.64	51.3	12325	12325	CAL27_CURCUMIN_pTy_R1.raw
1	RSPyAGLQLGAAK	Y4;	Replicate 1	Unambiguous	TRIM29	NP_036233.2	23650	tripartite motif-containing protein 29	1	1	17402909	Y4(Phospho)	1	S(2): 0.0; Y(4): 100.0	1	3308		1	20230000	Light	Excluded by Method	Not	5.15056	9767000	1505000		36	0.00564041	1	0	2	706.36	1411.71	2.85	50.88	12213	12213	CAL27_CURCUMIN_pTy_R1.raw
1	LyDLNMPAYVK	Y2;	Replicate 1	Unambiguous	NCK1	NP_001177725.1	4690	cytoplasmic protein NCK1 isoform 2	2	1	299829184	Y2(Phospho); K11(Label:13C(6))	1	Y(2): 100.0; Y(9): 0.0	1	8038			29730000	Heavy	Redundant	Not	0.772	28900000	29730000		58	4.4887e-05	0	43	2	706.835	1412.66	-0.24	79.99	19994	19994	CAL27_CURCUMIN_pTy_R1.raw
1	YALYDATyETK	Y8;	Replicate 1	Unambiguous	CFL1	NP_005498.1	1072	cofilin-1	3	1	5031635	T10(Phospho)	1	Y(1): 0.0; Y(4): 0.0; T(7): 0.6; Y(8): 99.4; T(10): 0.0	1	4279			49720000	Light	Redundant	Not	1.346	49260000	29050000		50	0.000223335	0	37	2	709.301	1417.59	1.13	56.82	13803	13803	CAL27_CURCUMIN_pTy_R1.raw
1	RPGPGtLYDVPR	T6;	Replicate 1	Unambiguous	BCAR1	NP_001164190.1	9564	breast cancer anti-estrogen resistance protein 1 isoform 7	9	1	282398123	R1(Label:13C(6)); Y8(Phospho); R12(Label:13C(6))	1	T(6): 99.6; Y(8): 0.4	1	3378			43110000	Heavy	Redundant	Not	1.55	84180000	43110000		55	7.29924e-05	0	27	3	473.911	1419.72	-0.3	51.42	12357	12357	CAL27_CURCUMIN_pTy_R1.raw
1	RPGPGtLYDVPR	T6;	Replicate 1	Unambiguous	BCAR1	NP_001164190.1	9564	breast cancer anti-estrogen resistance protein 1 isoform 7	9	1	282398123	R1(Label:13C(6)); Y8(Phospho); R12(Label:13C(6))	1	T(6): 99.6; Y(8): 0.4	1	3361			103900000	Heavy	Redundant	Not	1.584	207500000	103900000		46	0.000577172	0	13	2	710.363	1419.72	0.48	51.46	12368	12368	CAL27_CURCUMIN_pTy_R1.raw
1	SLDNGGyYISPR	Y7;	Replicate 1	Unambiguous	LYN	NP_001104567.1	4067	tyrosine-protein kinase Lyn isoform B	2	1	162287326	Y8(Phospho)	1	S(1): 0.0; Y(7): 99.5; Y(8): 0.5; S(10): 0.0	1	3987		1	2929000	Light	Excluded by Method	Not	1.53904	1639000	845200		50	0.000212303	0	45	2	711.31	1421.61	1.85	55.2	13366	13366	CAL27_CURCUMIN_pTy_R1.raw
1	YALYDATyETK	Y8;	Replicate 1	Unambiguous	CFL1	NP_005498.1	1072	cofilin-1	3	1	5031635	T10(Phospho); K11(Label:13C(6))	1	Y(1): 0.0; Y(4): 0.0; T(7): 0.6; Y(8): 99.4; T(10): 0.0	1	4279			29050000	Heavy	Redundant	Not	1.346	49260000	29050000		46	0.00055604	0	37	2	712.31	1423.61	-0.16	57.18	13897	13897	CAL27_CURCUMIN_pTy_R1.raw
1	SLDNGGyYISPR	Y7;	Replicate 1	Unambiguous	LYN	NP_001104567.1	4067	tyrosine-protein kinase Lyn isoform B	2	1	162287326	Y7(Phospho); R12(Label:13C(6))	1	S(1): 0.0; Y(7): 99.5; Y(8): 0.5; S(10): 0.0	1	3987		1	845200	Heavy	Excluded by Method	Not	1.53904	1639000	845200		57	4.79661e-05	0	39	2	714.319	1427.63	0.74	55.18	13362	13362	CAL27_CURCUMIN_pTy_R1.raw
1	LAAVTyNGVDNNK	Y6;	Replicate 1	Unambiguous	42254	NP_001229885.1	989	septin-7 isoform 3	3	1	339639597	Y6(Phospho)	1	T(5): 0.4; Y(6): 99.6	1				1178000		No Quan Values	Not					85	7.95501e-08	0	0	2	729.833	1458.66	-2.58	37.54	8618	8618	CAL27_CURCUMIN_pTy_R1.raw
1	GASQAGMTGyGMPR	Y10;	Replicate 1	Unambiguous	TAGLN2	NP_001264152.1	8407	transgelin-2 isoform b	3	1	469608407	Y10(Phospho)	1	S(3): 0.0; T(8): 0.0; Y(10): 100.0	1	2113			38710000	Light	Redundant	Not	3.178	37640000	9398000		60	1.90527e-05	0	4	2	732.294	1463.58	0.3	43.74	10291	10291	CAL27_CURCUMIN_pTy_R1.raw
1	GASQAGMTGyGMPR	Y10;	Replicate 1	Unambiguous	TAGLN2	NP_001264152.1	8407	transgelin-2 isoform b	3	1	469608407	Y10(Phospho)	1	S(3): 0.0; T(8): 0.0; Y(10): 100.0	1	2113			38710000	Light	Redundant	Not	3.178	37640000	9398000		45	0.000680701	0	0	2	732.295	1463.58	1.55	43.18	10141	10141	CAL27_CURCUMIN_pTy_R1.raw
1	GASQAGMTGyGMPR	Y10;	Replicate 1	Unambiguous	TAGLN2	NP_001264152.1	8407	transgelin-2 isoform b	3	1	469608407	Y10(Phospho); R14(Label:13C(6))	1	S(3): 0.0; T(8): 0.0; Y(10): 100.0	1	2113			9398000	Heavy	Redundant	Not	3.178	37640000	9398000		73	1.07884e-06	0	36	2	735.303	1469.6	-1.61	43.42	10206	10206	CAL27_CURCUMIN_pTy_R1.raw
1	GASQAGMTGyGMPR	Y10;	Replicate 1	Unambiguous	TAGLN2	NP_001264152.1	8407	transgelin-2 isoform b	3	1	469608407	Y10(Phospho); R14(Label:13C(6))	1	S(3): 0.0; T(8): 0.0; Y(10): 100.0	1	2113			9398000	Heavy	Redundant	Not	3.178	37640000	9398000		56	4.55991e-05	0	0	2	735.304	1469.6	0.39	43.99	10360	10360	CAL27_CURCUMIN_pTy_R1.raw
1	yATPQVIQAPGPR	Y1;	Replicate 1	Unambiguous	TNK2	NP_005772.3	10188	activated CDC42 kinase 1 isoform 1	2	1	56549666	Y1(Phospho)	1	Y(1): 99.4; T(3): 0.6	1	3730			51630000	Light	Redundant	Not	0.542	51630000	75640000		45	0.000927473	0	4	2	739.363	1477.72	-0.79	53.52	12918	12918	CAL27_CURCUMIN_pTy_R1.raw
1	yATPQVIQAPGPR	Y1;	Replicate 1	Unambiguous	TNK2	NP_005772.3	10188	activated CDC42 kinase 1 isoform 1	2	1	56549666	Y1(Phospho)	1	Y(1): 99.4; T(3): 0.6	1	3730			51630000	Light	Redundant	Not	0.542	51630000	75640000		37	0.00481178	0	59	2	739.363	1477.72	-0.21	54.07	13066	13066	CAL27_CURCUMIN_pTy_R1.raw
1	KLDNGGyYITTR	Y7;	Replicate 1	Unambiguous	YES1	NP_005424.1	7525	tyrosine-protein kinase Yes	4	1	4885661	Y8(Phospho)	1	Y(7): 99.6; Y(8): 0.4; T(10): 0.0; T(11): 0.0	1	2915			7473000	Light	Redundant	Not	0.935	7473000	6339000		39	0.00333176	1	17	2	740.845	1480.68	-0.79	48.41	11548	11548	CAL27_CURCUMIN_pTy_R1.raw
1	KLDNGGyYITTR	Y7;	Replicate 1	Unambiguous	YES1	NP_005424.1	7525	tyrosine-protein kinase Yes	4	1	4885661	Y7(Phospho)	1	Y(7): 99.6; Y(8): 0.4; T(10): 0.0; T(11): 0.0	1	2739			7200000	Light	Redundant	Not	0.889	5754000	5138000		32	0.0157417	1	44	3	494.233	1480.68	-0.1	47.24	11234	11234	CAL27_CURCUMIN_pTy_R1.raw
1	KLDNGGyYITTR	Y7;	Replicate 1	Unambiguous	YES1	NP_005424.1	7525	tyrosine-protein kinase Yes	4	1	4885661	Y7(Phospho)	1	Y(7): 99.6; Y(8): 0.4; T(10): 0.0; T(11): 0.0	1	2712			42240000	Light	Redundant	Not	1.069	42240000	31350000		39	0.00340164	1	13	2	740.845	1480.68	0.12	47.66	11345	11345	CAL27_CURCUMIN_pTy_R1.raw
1	KLDNGGyYITTR	Y7;	Replicate 1	Unambiguous	YES1	NP_005424.1	7525	tyrosine-protein kinase Yes	4	1	4885661	Y7(Phospho)	1	Y(7): 99.6; Y(8): 0.4; T(10): 0.0; T(11): 0.0	1	2712			42240000	Light	Redundant	Not	1.069	42240000	31350000		66	6.64566e-06	1	15	2	740.846	1480.68	0.78	47.14	11208	11208	CAL27_CURCUMIN_pTy_R1.raw
1	yATPQVIQAPGPR	Y1;	Replicate 1	Unambiguous	TNK2	NP_005772.3	10188	activated CDC42 kinase 1 isoform 1	2	1	56549666	Y1(Phospho); R13(Label:13C(6))	1	Y(1): 99.4; T(3): 0.6	1	3730			75640000	Heavy	Redundant	Not	0.542	51630000	75640000		65	7.03792e-06	0	5	2	742.374	1483.74	0.87	53.9	13021	13021	CAL27_CURCUMIN_pTy_R1.raw
1	VSLAGACGVGGyGSR	Y12;	Replicate 1	Unambiguous	KRT5	NP_000415.2	3852	keratin, type II cytoskeletal 5	1	1	119395754	C7(Carbamidomethyl); Y12(Phospho)	1	S(2): 0.0; Y(12): 99.6; S(14): 0.4	1	2913			171900000	Light	Redundant	Not	1.079	171900000	126500000		54	0.000104809	0	0	2	745.826	1490.65	-0.1	48.4	11547	11547	CAL27_CURCUMIN_pTy_R1.raw
1	VSLAGACGVGGyGSR	Y12;	Replicate 1	Unambiguous	KRT5	NP_000415.2	3852	keratin, type II cytoskeletal 5	1	1	119395754	C7(Carbamidomethyl); Y12(Phospho)	1	S(2): 0.0; Y(12): 99.6; S(14): 0.4	1	2913			171900000	Light	Redundant	Not	1.079	171900000	126500000		78	4.31717e-07	0	1	2	745.827	1490.65	0.64	48.96	11698	11698	CAL27_CURCUMIN_pTy_R1.raw
1	AQIPEGDyLSYR	Y8;	Replicate 1	Unambiguous	ERBB2IP	NP_001006600.1	55914	protein LAP2 isoform 7	6	1	55770895	Y11(Phospho)	1	Y(8): 98.8; S(10): 0.6; Y(11): 0.6	1	5259			13800000	Light	Unique	Used	3.898	10720000	2181000		23	0.129057	0	36	2	746.33	1491.65	0.78	62.76	15384	15384	CAL27_CURCUMIN_pTy_R1.raw
1	IMAISAGDAyASNK	Y10;	Replicate 1	Unambiguous	PKP2	NP_001005242.2	5318	plakophilin-2 isoform 2a	2	1	148664186	Y10(Phospho)	1	S(5): 0.0; Y(10): 99.1; S(12): 0.9	1	3242			3096000	Light	Redundant	Not	19.294	3096000	127300		25	0.070803	0	27	2	746.332	1491.66	1.69	50.51	12113	12113	CAL27_CURCUMIN_pTy_R1.raw
1	KLDNGGyYITTR	Y7;	Replicate 1	Unambiguous	YES1	NP_005424.1	7525	tyrosine-protein kinase Yes	4	1	4885661	K1(Label:13C(6)); Y8(Phospho); R12(Label:13C(6))	1	Y(7): 99.6; Y(8): 0.4; T(10): 0.0; T(11): 0.0	1	2712			31350000	Heavy	Redundant	Not	1.069	42240000	31350000		54	8.95707e-05	1	0	2	746.865	1492.72	0.13	47.05	11184	11184	CAL27_CURCUMIN_pTy_R1.raw
1	KLDNGGyYITTR	Y7;	Replicate 1	Unambiguous	YES1	NP_005424.1	7525	tyrosine-protein kinase Yes	4	1	4885661	K1(Label:13C(6)); Y8(Phospho); R12(Label:13C(6))	1	Y(7): 99.6; Y(8): 0.4; T(10): 0.0; T(11): 0.0	1	2712			31350000	Heavy	Redundant	Not	1.069	42240000	31350000		36	0.00640926	1	25	2	746.867	1492.73	2.01	47.69	11354	11354	CAL27_CURCUMIN_pTy_R1.raw
1	VSLAGACGVGGyGSR	Y12;	Replicate 1	Unambiguous	KRT5	NP_000415.2	3852	keratin, type II cytoskeletal 5	1	1	119395754	C7(Carbamidomethyl); Y12(Phospho); R15(Label:13C(6))	1	S(2): 0.0; Y(12): 99.6; S(14): 0.4	1	2913			126500000	Heavy	Redundant	Not	1.079	171900000	126500000		74	1.05115e-06	0	4	2	748.837	1496.67	0.4	48.97	11699	11699	CAL27_CURCUMIN_pTy_R1.raw
1	VSLAGACGVGGyGSR	Y12;	Replicate 1	Unambiguous	KRT5	NP_000415.2	3852	keratin, type II cytoskeletal 5	1	1	119395754	C7(Carbamidomethyl); S14(Phospho); R15(Label:13C(6))	1	S(2): 0.0; Y(12): 99.6; S(14): 0.4	1	2913			126500000	Heavy	Redundant	Not	1.079	171900000	126500000		71	2.19444e-06	0	54	2	748.837	1496.67	0.48	48.39	11544	11544	CAL27_CURCUMIN_pTy_R1.raw
1	SFSTAsAITPSVSR	S6;	Replicate 1	Unambiguous	KRT5	NP_000415.2	3852	keratin, type II cytoskeletal 5	1	1	119395754	S6(Phospho); R14(Label:13C(6))	1	S(1): 0.0; S(3): 0.0; T(4): 0.0; S(6): 100.0; T(9): 0.0; S(11): 0.0; S(13): 0.0	1	4887		1	1853000	Heavy	Excluded by Method	Not	0.690344	846000	972600		61	1.89765e-05	0	22	2	748.858	1496.71	0.28	60.48	14773	14773	CAL27_CURCUMIN_pTy_R1.raw
1	SAVGHEyVAEVEK	Y7;	Replicate 1	Unambiguous	HCLS1	NP_005326.2	3059	hematopoietic lineage cell-specific protein isoform 1	1	1	167234422	Y7(Phospho)	1	S(1): 0.0; Y(7): 100.0	1	1749	1		7819000	Light	Excluded by Method	Not	100	3845000	5315		62	1.37985e-05	0	0	2	749.336	1497.66	1.21	40.84	9512	9512	CAL27_CURCUMIN_pTy_R1.raw
1	KSFTPDHVVyAR	Y10;	Replicate 1	Unambiguous	PTRF	NP_036364.2	284119	polymerase I and transcript release factor	1	1	42734430	Y10(Phospho)	1	S(2): 0.0; T(4): 0.0; Y(10): 100.0	1	2191			62910000	Light	Redundant	Not	3.818	62910000	13070000		37	0.00538466	1	50	3	500.573	1499.7	0.03	43.7	10280	10280	CAL27_CURCUMIN_pTy_R1.raw
1	KSFTPDHVVyAR	Y10;	Replicate 1	Unambiguous	PTRF	NP_036364.2	284119	polymerase I and transcript release factor	1	1	42734430	Y10(Phospho)	1	S(2): 0.0; T(4): 0.0; Y(10): 100.0	1	2191			62910000	Light	Redundant	Not	3.818	62910000	13070000		51	0.000201991	1	25	3	500.573	1499.7	0.4	44.23	10425	10425	CAL27_CURCUMIN_pTy_R1.raw
1	STTNyVDFYSTK	Y5;	Replicate 1	Unambiguous	PKP4	NP_001005476.1	8502	plakophilin-4 isoform b	2	1	53829376	Y5(Phospho)	1	S(1): 0.0; T(2): 0.0; T(3): 0.0; Y(5): 100.0; Y(9): 0.0; S(10): 0.0; T(11): 0.0	1	4730			25570000	Light	Redundant	Not	1.246	25570000	16280000		58	3.19122e-05	0	19	2	753.314	1505.62	0.62	59.52	14517	14517	CAL27_CURCUMIN_pTy_R1.raw
1	STTNyVDFYSTK	Y5;	Replicate 1	Unambiguous	PKP4	NP_001005476.1	8502	plakophilin-4 isoform b	2	1	53829376	Y5(Phospho)	1	S(1): 0.0; T(2): 0.0; T(3): 0.0; Y(5): 100.0; Y(9): 0.0; S(10): 0.0; T(11): 0.0	1	4730			25570000	Light	Redundant	Not	1.246	25570000	16280000		71	1.74006e-06	0	30	2	753.315	1505.62	1.83	60.09	14670	14670	CAL27_CURCUMIN_pTy_R1.raw
1	APSTyGGGLSVSSSR	Y5;	Replicate 1	Unambiguous	KRT14	NP_000517.2	3861	keratin, type I cytoskeletal 14	1	1	15431310	Y5(Phospho)	1	S(3): 0.5; T(4): 0.5; Y(5): 99.0; S(10): 0.0; S(12): 0.0; S(13): 0.0; S(14): 0.0	1	1516			11590000	Light	Redundant	Not	2.94	10230000	2761000		77	4.48009e-07	0	23	2	753.335	1505.66	0.26	39.76	9221	9221	CAL27_CURCUMIN_pTy_R1.raw
1	APSTyGGGLSVSSSR	Y5;	Replicate 1	Unambiguous	KRT14	NP_000517.2	3861	keratin, type I cytoskeletal 14	1	1	15431310	Y5(Phospho)	1	S(3): 0.5; T(4): 0.5; Y(5): 99.0; S(10): 0.0; S(12): 0.0; S(13): 0.0; S(14): 0.0	1	1516			11590000	Light	Unique	Used	2.94	10230000	2761000		44	0.00110205	0	0	2	753.338	1505.67	3.34	39.23	9077	9077	CAL27_CURCUMIN_pTy_R1.raw
1	DASSQDCyDIPR	Y8;	Replicate 1	Unambiguous	GAB1	NP_002030.2	2549	GRB2-associated-binding protein 1 isoform b	2	1	46370073	C7(Carbamidomethyl); Y8(Phospho)	1	S(3): 0.0; S(4): 0.6; Y(8): 99.4	1	1274			994100	Light	Unique	Used	0.586	994100	1345000		25	0.056488	0	0	2	753.78	1506.55	-3.18	37.51	8610	8610	CAL27_CURCUMIN_pTy_R1.raw
1	TGHGYVyEYPSR	Y7;	Replicate 1	Unambiguous	NEDD9	NP_001257962.1	4739	enhancer of filamentation 1 isoform 4	3	1	402691666	Y7(Phospho)	1	T(1): 0.0; Y(5): 0.0; Y(7): 99.4; Y(9): 0.6; S(11): 0.0	1	1984		1	1110000	Light	Excluded by Method	Not	0.509502	611800	953000		27	0.0433431	0	70	2	754.813	1508.62	-0.86	42.43	9938	9938	CAL27_CURCUMIN_pTy_R1.raw
1	STTNyVDFYSTK	Y5;	Replicate 1	Unambiguous	PKP4	NP_001005476.1	8502	plakophilin-4 isoform b	2	1	53829376	Y5(Phospho); K12(Label:13C(6))	1	S(1): 0.0; T(2): 0.0; T(3): 0.0; Y(5): 100.0; Y(9): 0.0; S(10): 0.0; T(11): 0.0	1	4730			16280000	Heavy	Redundant	Not	1.246	25570000	16280000		41	0.0018466	0	15	2	756.324	1511.64	0.38	59.9	14619	14619	CAL27_CURCUMIN_pTy_R1.raw
1	APSTyGGGLSVSSSR	Y5;	Replicate 1	Unambiguous	KRT14	NP_000517.2	3861	keratin, type I cytoskeletal 14	1	1	15431310	Y5(Phospho); R15(Label:13C(6))	1	S(3): 0.5; T(4): 0.5; Y(5): 99.0; S(10): 0.0; S(12): 0.0; S(13): 0.0; S(14): 0.0	1	1516			2761000	Heavy	Redundant	Not	2.94	10230000	2761000		34	0.0110693	0	38	2	756.346	1511.68	0.51	39.53	9157	9157	CAL27_CURCUMIN_pTy_R1.raw
1	PyQYPALTPEQK	Y2;	Replicate 1	Unambiguous	ALDOA	NP_908932.1	226	fructose-bisphosphate aldolase A isoform 1	1	1	34577112	Y2(Phospho)	1	Y(2): 100.0; Y(4): 0.0; T(8): 0.0	1				1008000		No Quan Values	Not					43	0.00112964	0	24	2	757.851	1514.69	0.85	53.56	12929	12929	CAL27_CURCUMIN_pTy_R1.raw
1	VyENVGLMQQQK	Y2;	Replicate 1	Unambiguous	PTPN11	NP_002825.3	5781	tyrosine-protein phosphatase non-receptor type 11 isoform 1	1	1	33356177	Y2(Phospho)	1	Y(2): 100.0	1	3095			90670000	Light	Redundant	Not	1.788	90670000	40250000		61	2.18624e-05	0	21	2	758.847	1516.69	0.21	49.67	11885	11885	CAL27_CURCUMIN_pTy_R1.raw
1	GQyHTLQAGFSSR	Y3;	Replicate 1	Unambiguous	PKP3	NP_009114.1	11187	plakophilin-3	1	1	6005830	Y3(Phospho)	1	Y(3): 100.0; T(5): 0.0; S(11): 0.0; S(12): 0.0	1	2378			32100000	Light	Redundant	Not	3.531	31830000	7153000		95	8.34064e-09	0	0	2	766.34	1531.67	1.85	44.85	10591	10591	CAL27_CURCUMIN_pTy_R1.raw
1	TADSVFCPHyEK	Y10;	Replicate 1	Unambiguous	EFNB2	NP_004084.1	1948	ephrin-B2 precursor	1	1	4758250	C7(Carbamidomethyl); Y10(Phospho)	1	T(1): 0.0; S(4): 0.0; Y(10): 100.0	1	2615			2422000	Light	Redundant	Not	1.42	2422000	1354000		65	5.68796e-06	0	12	2	767.308	1533.61	0.52	46.45	11022	11022	CAL27_CURCUMIN_pTy_R1.raw
1	SAENGIySVSGDEK	Y7;	Replicate 1	Unambiguous	SLC6A8	NP_001136277.1	6535	sodium- and chloride-dependent creatine transporter 1 isoform 2	2	1	218563756	Y7(Phospho)	1	S(1): 0.0; Y(7): 99.3; S(8): 0.7; S(10): 0.0	1	1104			5248000	Light	Unique	Used	8.096	4668000	457500		32	0.0125013	0	0	2	768.317	1535.63	0.93	36.3	8282	8282	CAL27_CURCUMIN_pTy_R1.raw
1	QADSEMTGyVVTR	Y9;	Replicate 1	Unambiguous	MAPK12	NP_002960.2	6300	mitogen-activated protein kinase 12	1	1	48255970	Y9(Phospho)	1	S(4): 0.0; T(7): 0.0; Y(9): 100.0; T(12): 0.0	1	2621			62800000	Light	Redundant	Not	3.247	57720000	14110000		72	1.21048e-06	0	23	2	768.823	1536.64	-0.32	46.48	11031	11031	CAL27_CURCUMIN_pTy_R1.raw
1	QADSEMTGyVVTR	Y9;	Replicate 1	Unambiguous	MAPK12	NP_002960.2	6300	mitogen-activated protein kinase 12	1	1	48255970	Y9(Phospho)	1	S(4): 0.0; T(7): 0.0; Y(9): 100.0; T(12): 0.0	1	2621			62800000	Light	Redundant	Not	3.247	57720000	14110000		74	7.39531e-07	0	29	2	768.824	1536.64	0.95	47.02	11177	11177	CAL27_CURCUMIN_pTy_R1.raw
1	GQyHTLQAGFSSR	Y3;	Replicate 1	Unambiguous	PKP3	NP_009114.1	11187	plakophilin-3	1	1	6005830	Y3(Phospho); R13(Label:13C(6))	1	Y(3): 100.0; T(5): 0.0; S(11): 0.0; S(12): 0.0	1	2378			7153000	Heavy	Redundant	Not	3.531	31830000	7153000		68	3.97605e-06	0	37	2	769.348	1537.69	0.02	45.06	10650	10650	CAL27_CURCUMIN_pTy_R1.raw
1	SYSPyDMLESIR	Y5;	Replicate 1	Unambiguous	ANXA2	NP_001002857.1	302	annexin A2 isoform 2	2	1	50845386	Y5(Phospho)	1	S(1): 0.0; Y(2): 0.0; S(3): 0.0; Y(5): 100.0; S(10): 0.0	1	11478			130800000	Light	Redundant	Not	1.476	130800000	70350000		78	3.21592e-07	0	7	2	770.824	1540.64	0.94	102.27	25957	25957	CAL27_CURCUMIN_pTy_R1.raw
1	SYSPyDMLESIR	Y5;	Replicate 1	Unambiguous	ANXA2	NP_001002857.1	302	annexin A2 isoform 2	2	1	50845386	Y5(Phospho)	1	S(1): 0.0; Y(2): 0.0; S(3): 0.0; Y(5): 100.0; S(10): 0.0	1	11478			130800000	Light	Redundant	Not	1.476	130800000	70350000		61	1.7596e-05	0	34	2	770.824	1540.64	1.65	101.73	25811	25811	CAL27_CURCUMIN_pTy_R1.raw
1	QADSEMTGyVVTR	Y9;	Replicate 1	Unambiguous	MAPK12	NP_002960.2	6300	mitogen-activated protein kinase 12	1	1	48255970	Y9(Phospho); R13(Label:13C(6))	1	S(4): 0.0; T(7): 0.0; Y(9): 100.0; T(12): 0.0	1	2621			14110000	Heavy	Redundant	Not	3.247	57720000	14110000		55	7.6939e-05	0	73	2	771.835	1542.66	1.75	47.01	11173	11173	CAL27_CURCUMIN_pTy_R1.raw
1	GALADyEGKDVATR	Y6;	Replicate 1	Unambiguous	ZNF185	NP_001171584.1	7739	zinc finger protein 185 isoform 7	7	1	296010977	Y6(Phospho)	1	Y(6): 100.0; T(13): 0.0	1	1850			6304000	Light	Redundant	Not	2.246	6304000	2228000		40	0.00248936	1	21	2	773.352	1545.7	1.39	41.58	9711	9711	CAL27_CURCUMIN_pTy_R1.raw
1	SYSPyDMLESIR	Y5;	Replicate 1	Unambiguous	ANXA2	NP_001002857.1	302	annexin A2 isoform 2	2	1	50845386	Y5(Phospho); R12(Label:13C(6))	1	S(1): 0.0; Y(2): 0.0; S(3): 0.0; Y(5): 100.0; S(10): 0.0	1	11478			71110000	Heavy	Redundant	Not	1.476	130800000	70350000		57	4.15275e-05	0	32	2	773.832	1546.66	-1.19	101.8	25831	25831	CAL27_CURCUMIN_pTy_R1.raw
1	SYSPyDMLESIR	Y5;	Replicate 1	Unambiguous	ANXA2	NP_001002857.1	302	annexin A2 isoform 2	2	1	50845386	Y5(Phospho); R12(Label:13C(6))	1	S(1): 0.0; Y(2): 0.0; S(3): 0.0; Y(5): 100.0; S(10): 0.0	1	11478			71110000	Heavy	Redundant	Not	1.476	130800000	70350000		61	1.49953e-05	0	8	2	773.834	1546.66	0.71	102.4	25992	25992	CAL27_CURCUMIN_pTy_R1.raw
1	QADEEMTGyVATR	Y9;	Replicate 1	Unambiguous	MAPK11	NP_002742.3	5600	mitogen-activated protein kinase 11	1	1	20128774	Y9(Phospho)	1	T(7): 0.7; Y(9): 98.6; T(12): 0.7	1	1759			32020000	Light	Redundant	Not	2.543	30530000	9527000		83	1.11675e-07	0	11	2	775.814	1550.62	0.3	40.89	9528	9528	CAL27_CURCUMIN_pTy_R1.raw
1	QADEEMTGyVATR	Y9;	Replicate 1	Unambiguous	MAPK11	NP_002742.3	5600	mitogen-activated protein kinase 11	1	1	20128774	Y9(Phospho)	1	T(7): 0.7; Y(9): 98.6; T(12): 0.7	1	1759			32020000	Light	Redundant	Not	2.543	30530000	9527000		79	2.57014e-07	0	0	2	775.814	1550.62	0.69	41.45	9675	9675	CAL27_CURCUMIN_pTy_R1.raw
1	QADSEMTGyVVTR	Y9;	Replicate 1	Unambiguous	MAPK12	NP_002960.2	6300	mitogen-activated protein kinase 12	1	1	48255970	M6(Oxidation); Y9(Phospho)	1	S(4): 0.0; T(7): 0.0; Y(9): 100.0; T(12): 0.0	1	2629	1		2754000	Light	Excluded by Method	Not	100	1252000	5315		77	4.53266e-07	0	39	2	776.823	1552.64	1.94	46.52	11042	11042	CAL27_CURCUMIN_pTy_R1.raw
1	SSSAGGQGSyVPLLR	Y10;	Replicate 1	Unambiguous	LSR	NP_001247419.1	51599	lipolysis-stimulated lipoprotein receptor isoform 5	5	1	386781463	Y10(Phospho)	1	S(1): 0.0; S(2): 0.0; S(3): 0.0; S(9): 0.8; Y(10): 99.2	1	5503			17880000	Light	Redundant	Not	4.888	17880000	2902000		48	0.000550983	0	20	2	779.866	1558.72	-1.29	64.15	15755	15755	CAL27_CURCUMIN_pTy_R1.raw
1	SSSAGGQGSyVPLLR	Y10;	Replicate 1	Unambiguous	LSR	NP_001247419.1	51599	lipolysis-stimulated lipoprotein receptor isoform 5	5	1	386781463	Y10(Phospho)	1	S(1): 0.0; S(2): 0.0; S(3): 0.0; S(9): 0.8; Y(10): 99.2	1	5556			16440000	Light	Redundant	Not	4.178	16440000	3122000		69	4.06843e-06	0	7	2	779.867	1558.73	-0.11	64.73	15912	15912	CAL27_CURCUMIN_pTy_R1.raw
1	SSSAGGQGSyVPLLR	Y10;	Replicate 1	Unambiguous	LSR	NP_001247419.1	51599	lipolysis-stimulated lipoprotein receptor isoform 5	5	1	386781463	Y10(Phospho); R15(Label:13C(6))	1	S(1): 0.0; S(2): 0.0; S(3): 0.0; S(9): 0.8; Y(10): 99.2	1	5556			3122000	Heavy	Redundant	Not	4.178	16440000	3122000		51	0.000221275	0	21	2	782.876	1564.75	-0.49	64.46	15839	15839	CAL27_CURCUMIN_pTy_R1.raw
1	QADEEMTGyVATR	Y9;	Replicate 1	Unambiguous	MAPK11	NP_002742.3	5600	mitogen-activated protein kinase 11	1	1	20128774	M6(Oxidation); Y9(Phospho)	1	T(7): 0.7; Y(9): 98.6; T(12): 0.7	1	1764	1		968600	Light	Excluded by Method	Not	100	640900	5315		26	0.047119	0	21	2	783.812	1566.62	1.91	40.95	9541	9541	CAL27_CURCUMIN_pTy_R1.raw
1	REEPEALyAAVNK	Y8;	Replicate 1	Unambiguous	ITSN2	NP_671494.2	50618	intersectin-2 isoform 2	3	1	194294525	Y8(Phospho)	1	Y(8): 100.0	1	3853			26310000	Light	Redundant	Not	1.443	26310000	14470000		60	2.80802e-05	1	12	2	785.37	1569.73	0.9	54.82	13265	13265	CAL27_CURCUMIN_pTy_R1.raw
1	REEPEALyAAVNK	Y8;	Replicate 1	Unambiguous	ITSN2	NP_671494.2	50618	intersectin-2 isoform 2	3	1	194294525	Y8(Phospho)	1	Y(8): 100.0	1	3853			26310000	Light	Unique	Used	1.443	26310000	14470000		24	0.105422	1	29	2	785.37	1569.73	1.13	54.26	13118	13118	CAL27_CURCUMIN_pTy_R1.raw
1	SQPVyIQYSNHR	Y5;	Replicate 1	Unambiguous	PTBP3	NP_001231825.1	9991	polypyrimidine tract-binding protein 3 isoform 4	6	1	349732186	Y5(Phospho)	1	S(1): 0.0; Y(5): 100.0; Y(8): 0.0; S(9): 0.0	1	2241		1	5929000	Light	Excluded by Method	Not	26.3209	2944000	88770		23	0.135245	0	0	2	786.353	1571.7	-0.47	44	10361	10361	CAL27_CURCUMIN_pTy_R1.raw
1	SQPVyIQYSNHR	Y5;	Replicate 1	Unambiguous	PTBP3	NP_001231825.1	9991	polypyrimidine tract-binding protein 3 isoform 4	6	1	349732186	Y5(Phospho)	1	S(1): 0.0; Y(5): 100.0; Y(8): 0.0; S(9): 0.0	1	2261			6236000	Light	Redundant	Not	5.828	5247000	714400		25	0.0877403	0	40	3	524.572	1571.7	0.33	44.11	10391	10391	CAL27_CURCUMIN_pTy_R1.raw
1	QVEyLDLDLDSGK	Y4;	Replicate 1	Unambiguous	GAB1	NP_002030.2	2549	GRB2-associated-binding protein 1 isoform b	2	1	46370073	Y4(Phospho)	1	Y(4): 100.0; S(11): 0.0	1	7668			1470000	Light	Redundant	Not	0.759	1470000	1537000		27	0.0502794	0	83	2	787.853	1574.7	0.56	77.68	19376	19376	CAL27_CURCUMIN_pTy_R1.raw
1	SSLyEGLEKPESR	Y4;	Replicate 1	Unambiguous	ATP2B2	NP_001674.2	491	plasma membrane calcium-transporting ATPase 2 isoform 2	3	1	48255949	Y4(Phospho)	1	S(1): 0.0; S(2): 0.0; Y(4): 100.0; S(12): 0.0	1	3117		1	3558000	Light	Excluded by Method	Not	3.60922	1719000	378000		24	0.11928	0	62	3	525.574	1574.71	-0.88	49.79	11917	11917	CAL27_CURCUMIN_pTy_R1.raw
1	SSLyEGLEKPESR	Y4;	Replicate 1	Unambiguous	ATP2B2	NP_001674.2	491	plasma membrane calcium-transporting ATPase 2 isoform 2	3	1	48255949	Y4(Phospho)	1	S(1): 0.0; S(2): 0.0; Y(4): 100.0; S(12): 0.0	1	3098	1		8971000	Light	Excluded by Method	Not	100	4565000	5315		58	3.7518e-05	0	0	2	787.859	1574.71	0.95	49.68	11889	11889	CAL27_CURCUMIN_pTy_R1.raw
2	HTDDEMtGyVATR	T7; Y9;	Replicate 1	Unambiguous	MAPK14	NP_620582.1	1432	mitogen-activated protein kinase 14 isoform 3	4	1	20986514	Y9(Phospho)	1	T(2): 0.0; T(7): 99.2; Y(9): 99.2; T(12): 1.7	1	966			284100000	Light	Redundant	Not	1.686	284100000	133700000		59	2.48861e-05	0	7	3	525.876	1575.61	0.05	35.11	7964	7964	CAL27_CURCUMIN_pTy_R1.raw
2	HTDDEMtGyVATR	T7; Y9;	Replicate 1	Unambiguous	MAPK14	NP_620582.1	1432	mitogen-activated protein kinase 14 isoform 3	4	1	20986514	Y9(Phospho)	1	T(2): 0.0; T(7): 99.2; Y(9): 99.2; T(12): 1.7	1	968			614700000	Light	Redundant	Not	1.671	614700000	291900000		50	0.000193623	0	8	2	788.311	1575.61	0.22	36.29	8280	8280	CAL27_CURCUMIN_pTy_R1.raw
2	HTDDEMtGyVATR	T7; Y9;	Replicate 1	Unambiguous	MAPK14	NP_620582.1	1432	mitogen-activated protein kinase 14 isoform 3	4	1	20986514	Y9(Phospho)	1	T(2): 0.0; T(7): 99.2; Y(9): 99.2; T(12): 1.7	1	968			614700000	Light	Redundant	Not	1.671	614700000	291900000		73	9.95306e-07	0	0	2	788.311	1575.62	0.68	35.2	7987	7987	CAL27_CURCUMIN_pTy_R1.raw
2	HTDDEMtGyVATR	T7; Y9;	Replicate 1	Unambiguous	MAPK14	NP_620582.1	1432	mitogen-activated protein kinase 14 isoform 3	4	1	20986514	T12(Phospho)	1	T(2): 0.0; T(7): 99.2; Y(9): 99.2; T(12): 1.7	1	1179		1	241300	Light	Excluded by Method	Not	0.917318	126100	109100		48	0.000333393	0	0	2	788.312	1575.62	1.3	36.85	8433	8433	CAL27_CURCUMIN_pTy_R1.raw
2	HTDDEMtGyVATR	T7; Y9;	Replicate 1	Unambiguous	MAPK14	NP_620582.1	1432	mitogen-activated protein kinase 14 isoform 3	4	1	20986514	Y9(Phospho)	1	T(2): 0.0; T(7): 99.2; Y(9): 99.2; T(12): 1.7	1	968			614700000	Light	Redundant	Not	1.671	614700000	291900000		73	1.01381e-06	0	1	2	788.312	1575.62	1.54	35.77	8139	8139	CAL27_CURCUMIN_pTy_R1.raw
2	HTDDEMtGyVATR	T7; Y9;	Replicate 1	Unambiguous	MAPK14	NP_620582.1	1432	mitogen-activated protein kinase 14 isoform 3	4	1	20986514	Y9(Phospho)	1	T(2): 0.0; T(7): 99.2; Y(9): 99.2; T(12): 1.7	1	966			284100000	Light	Redundant	Not	1.686	284100000	133700000		51	0.000160309	0	2	3	525.878	1575.62	2.49	35.67	8111	8111	CAL27_CURCUMIN_pTy_R1.raw
2	HTDDEMtGyVATR	T7; Y9;	Replicate 1	Unambiguous	MAPK14	NP_620582.1	1432	mitogen-activated protein kinase 14 isoform 3	4	1	20986514	Y9(Phospho); R13(Label:13C(6))	1	T(2): 0.0; T(7): 99.2; Y(9): 99.2; T(12): 1.7	1	966			134200000	Heavy	Redundant	Not	1.686	284100000	133700000		41	0.0017781	0	38	3	527.883	1581.63	-0.75	35.21	7988	7988	CAL27_CURCUMIN_pTy_R1.raw
2	HTDDEMtGyVATR	T7; Y9;	Replicate 1	Unambiguous	MAPK14	NP_620582.1	1432	mitogen-activated protein kinase 14 isoform 3	4	1	20986514	Y9(Phospho); R13(Label:13C(6))	1	T(2): 0.0; T(7): 99.2; Y(9): 99.2; T(12): 1.7	1	966			134200000	Heavy	Redundant	Not	1.686	284100000	133700000		50	0.000213775	0	18	3	527.883	1581.63	-0.29	35.88	8170	8170	CAL27_CURCUMIN_pTy_R1.raw
2	HTDDEMtGyVATR	T7; Y9;	Replicate 1	Unambiguous	MAPK14	NP_620582.1	1432	mitogen-activated protein kinase 14 isoform 3	4	1	20986514	Y9(Phospho); R13(Label:13C(6))	1	T(2): 0.0; T(7): 99.2; Y(9): 99.2; T(12): 1.7	1	968			293000000	Heavy	Redundant	Not	1.671	614700000	291900000		76	4.86359e-07	0	3	2	791.323	1581.64	2	35.66	8110	8110	CAL27_CURCUMIN_pTy_R1.raw
2	HTDDEMtGyVATR	T7; Y9;	Replicate 1	Unambiguous	MAPK14	NP_620582.1	1432	mitogen-activated protein kinase 14 isoform 3	4	1	20986514	T7(Phospho); R13(Label:13C(6))	1	T(2): 0.0; T(7): 99.2; Y(9): 99.2; T(12): 1.7	1	968			293000000	Heavy	Redundant	Not	1.671	614700000	291900000		46	0.000462181	0	0	2	791.323	1581.64	2.08	36.21	8259	8259	CAL27_CURCUMIN_pTy_R1.raw
2	HTDDEMtGyVATR	T7; Y9;	Replicate 1	Unambiguous	MAPK14	NP_620582.1	1432	mitogen-activated protein kinase 14 isoform 3	4	1	20986514	T12(Phospho); R13(Label:13C(6))	1	T(2): 0.0; T(7): 99.2; Y(9): 99.2; T(12): 1.7	1	968			293000000	Heavy	Unique	Used	1.671	614700000	291900000		26	0.050097	0	5	2	791.323	1581.64	2.15	35.12	7968	7968	CAL27_CURCUMIN_pTy_R1.raw
1	REEPEALyAAVNK	Y8;	Replicate 1	Unambiguous	ITSN2	NP_671494.2	50618	intersectin-2 isoform 2	3	1	194294525	R1(Label:13C(6)); Y8(Phospho); K13(Label:13C(6))	1	Y(8): 100.0	1	3853			14470000	Heavy	Redundant	Not	1.443	26310000	14470000		40	0.00231578	1	19	2	791.39	1581.77	0.76	54.67	13226	13226	CAL27_CURCUMIN_pTy_R1.raw
1	SWHDVQVSSAyVK	Y11;	Replicate 1	Unambiguous	TPD52L2	NP_001230820.1	7165	tumor protein D54 isoform g	5	1	345197262	Y11(Phospho)	1	S(1): 0.0; S(8): 0.0; S(9): 0.0; Y(11): 100.0	1	3929	1		6197000	Light	Excluded by Method	Not	100	3374000	5315		34	0.0104178	0	75	2	793.356	1585.7	0.2	54.83	13270	13270	CAL27_CURCUMIN_pTy_R1.raw
1	LPSSPVyEDAASFK	Y7;	Replicate 1	Unambiguous	CTTN	NP_612632.1	2017	src substrate cortactin isoform b	3	1	20357556	Y7(Phospho)	1	S(3): 0.0; S(4): 0.0; Y(7): 100.0; S(12): 0.0	1	6239			60250000	Light	Redundant	Not	2.077	59920000	22890000		64	1.06693e-05	0	19	2	795.858	1590.71	0	68.61	16951	16951	CAL27_CURCUMIN_pTy_R1.raw
1	LPSSPVyEDAASFK	Y7;	Replicate 1	Unambiguous	CTTN	NP_612632.1	2017	src substrate cortactin isoform b	3	1	20357556	Y7(Phospho)	1	S(3): 0.0; S(4): 0.0; Y(7): 100.0; S(12): 0.0	1	6239			60250000	Light	Redundant	Not	2.077	59920000	22890000		66	7.04501e-06	0	5	2	795.859	1590.71	0.76	69.16	17099	17099	CAL27_CURCUMIN_pTy_R1.raw
2	HTDDEMtGyVATR	T7; Y9;	Replicate 1	Unambiguous	MAPK14	NP_620582.1	1432	mitogen-activated protein kinase 14 isoform 3	4	1	20986514	M6(Oxidation); Y9(Phospho)	1	T(2): 0.0; T(7): 99.2; Y(9): 99.2; T(12): 1.7	1	984			5453000	Light	Redundant	Not	1.583	5453000	2734000		46	0.000499985	0	57	3	531.208	1591.61	0.45	35.31	8015	8015	CAL27_CURCUMIN_pTy_R1.raw
2	HTDDEMtGyVATR	T7; Y9;	Replicate 1	Unambiguous	MAPK14	NP_620582.1	1432	mitogen-activated protein kinase 14 isoform 3	4	1	20986514	M6(Oxidation); Y9(Phospho)	1	T(2): 0.0; T(7): 99.2; Y(9): 99.2; T(12): 1.7	1	1016			27650000	Light	Redundant	Not	1.701	26840000	12520000		74	8.51053e-07	0	1	2	796.309	1591.61	0.96	35.6	8094	8094	CAL27_CURCUMIN_pTy_R1.raw
1	TEGTyDLPYWDR	Y5;	Replicate 1	Unambiguous	DCBLD2	NP_563615.3	131566	discoidin, CUB and LCCL domain-containing protein 2 precursor	1	1	54792129	Y5(Phospho)	1	T(1): 0.0; T(4): 0.5; Y(5): 99.5; Y(9): 0.0	1	7319		1	7904000	Light	Excluded by Method	Not	4.54789	3774000	658600		64	9.94258e-06	0	10	2	798.323	1595.64	-1.85	75.22	18719	18719	CAL27_CURCUMIN_pTy_R1.raw
1	TEGTyDLPYWDR	Y5;	Replicate 1	Unambiguous	DCBLD2	NP_563615.3	131566	discoidin, CUB and LCCL domain-containing protein 2 precursor	1	1	54792129	Y5(Phospho)	1	T(1): 0.0; T(4): 0.5; Y(5): 99.5; Y(9): 0.0	1	7319		1	7904000	Light	Excluded by Method	Not	4.54789	3774000	658600		52	0.000133032	0	17	2	798.325	1595.64	1.14	75.76	18865	18865	CAL27_CURCUMIN_pTy_R1.raw
1	LPSSPVyEDAASFK	Y7;	Replicate 1	Unambiguous	CTTN	NP_612632.1	2017	src substrate cortactin isoform b	3	1	20357556	Y7(Phospho); K14(Label:13C(6))	1	S(3): 0.0; S(4): 0.0; Y(7): 100.0; S(12): 0.0	1	6239			22890000	Heavy	Redundant	Not	2.077	59920000	22890000		64	1.0655e-05	0	9	2	798.869	1596.73	1.15	69.06	17071	17071	CAL27_CURCUMIN_pTy_R1.raw
2	HTDDEMtGyVATR	T7; Y9;	Replicate 1	Unambiguous	MAPK14	NP_620582.1	1432	mitogen-activated protein kinase 14 isoform 3	4	1	20986514	M6(Oxidation); Y9(Phospho); R13(Label:13C(6))	1	T(2): 0.0; T(7): 99.2; Y(9): 99.2; T(12): 1.7	1	984			3105000	Heavy	Redundant	Not	1.583	5453000	2734000		41	0.00142875	0	35	3	533.215	1597.63	0.57	35.38	8033	8033	CAL27_CURCUMIN_pTy_R1.raw
2	HTDDEMtGyVATR	T7; Y9;	Replicate 1	Unambiguous	MAPK14	NP_620582.1	1432	mitogen-activated protein kinase 14 isoform 3	4	1	20986514	M6(Oxidation); Y9(Phospho); R13(Label:13C(6))	1	T(2): 0.0; T(7): 99.2; Y(9): 99.2; T(12): 1.7	1	1016			12520000	Heavy	Redundant	Not	1.701	26840000	12520000		68	3.53962e-06	0	5	2	799.319	1597.63	1.19	35.61	8095	8095	CAL27_CURCUMIN_pTy_R1.raw
1	LLAQAEGEPCyIR	Y11;	Replicate 1	Unambiguous	TYK2	NP_003322.3	7297	non-receptor tyrosine-protein kinase TYK2	1	1	187608615	C10(Carbamidomethyl); Y11(Phospho)	1	Y(11): 100.0	1	4462			67040000	Light	Redundant	Not	0.896	67040000	59400000		50	0.000312534	0	39	2	800.367	1599.73	1.26	57.97	14105	14105	CAL27_CURCUMIN_pTy_R1.raw
1	LLAQAEGEPCyIR	Y11;	Replicate 1	Unambiguous	TYK2	NP_003322.3	7297	non-receptor tyrosine-protein kinase TYK2	1	1	187608615	C10(Carbamidomethyl); Y11(Phospho); R13(Label:13C(6))	1	Y(11): 100.0	1	4462			59400000	Heavy	Redundant	Not	0.896	67040000	59400000		32	0.019368	0	38	2	803.376	1605.75	0.89	57.97	14106	14106	CAL27_CURCUMIN_pTy_R1.raw
1	DPHLLDPTVEyVK	Y11;	Replicate 1	Unambiguous	BCAR3	NP_001248338.1	8412	breast cancer anti-estrogen resistance protein 3 isoform 1	1	1	387157909	Y11(Phospho)	1	T(8): 0.0; Y(11): 100.0	1	6183			11420000	Light	Redundant	Not	1.521	11140000	5813000		22	0.169784	0	26	2	803.383	1605.76	1.65	68.15	16829	16829	CAL27_CURCUMIN_pTy_R1.raw
1	VyESIGQYGGETVK	Y2;	Replicate 1	Unambiguous	MPP5	NP_001243479.1	64398	MAGUK p55 subfamily member 5 isoform 2	2	1	375065852	Y2(Phospho)	1	Y(2): 100.0; S(4): 0.0; Y(8): 0.0; T(12): 0.0	1	3785			42460000	Light	Redundant	Not	2.649	42460000	12720000		76	6.6209e-07	0	7	2	805.361	1609.72	0.26	54.36	13144	13144	CAL27_CURCUMIN_pTy_R1.raw
1	VyESIGQYGGETVK	Y2;	Replicate 1	Unambiguous	MPP5	NP_001243479.1	64398	MAGUK p55 subfamily member 5 isoform 2	2	1	375065852	Y2(Phospho)	1	Y(2): 100.0; S(4): 0.0; Y(8): 0.0; T(12): 0.0	1	3785			42460000	Light	Redundant	Not	2.649	42460000	12720000		55	7.78129e-05	0	14	2	805.362	1609.72	0.72	53.83	13001	13001	CAL27_CURCUMIN_pTy_R1.raw
1	VMIyQDEVKLPAK	Y4;	Replicate 1	Unambiguous	PTRF	NP_036364.2	284119	polymerase I and transcript release factor	1	1	42734430	Y4(Phospho)	1	Y(4): 100.0	1	5785			1816000	Light	Unique	Used	1.213	1743000	1140000		48	0.000395039	1	21	2	807.406	1613.8	2.36	65.85	16210	16210	CAL27_CURCUMIN_pTy_R1.raw
1	VGEEEHVySFPNK	Y8;	Replicate 1	Unambiguous	PXN	NP_002850.2	5829	paxillin isoform 1	3	1	170932516	Y8(Phospho)	1	Y(8): 99.6; S(9): 0.4	1	2320			365400000	Light	Redundant	Not	0.809	365400000	358600000		71	2.25549e-06	0	0	2	807.846	1614.68	0.53	45	10633	10633	CAL27_CURCUMIN_pTy_R1.raw
1	VGEEEHVySFPNK	Y8;	Replicate 1	Unambiguous	PXN	NP_002850.2	5829	paxillin isoform 1	3	1	170932516	Y8(Phospho)	1	Y(8): 99.6; S(9): 0.4	1	2320			365400000	Light	Redundant	Not	0.809	365400000	358600000		62	1.69196e-05	0	31	2	807.846	1614.68	0.84	45.54	10780	10780	CAL27_CURCUMIN_pTy_R1.raw
1	VGEEEHVySFPNK	Y8;	Replicate 1	Unambiguous	PXN	NP_002850.2	5829	paxillin isoform 1	3	1	170932516	S9(Phospho)	1	Y(8): 99.6; S(9): 0.4	1	2338			254800000	Light	Redundant	Not	0.785	253200000	256100000		29	0.0327392	0	22	3	538.9	1614.69	1.17	45.33	10722	10722	CAL27_CURCUMIN_pTy_R1.raw
1	VGEEEHVySFPNK	Y8;	Replicate 1	Unambiguous	PXN	NP_002850.2	5829	paxillin isoform 1	3	1	170932516	Y8(Phospho)	1	Y(8): 99.6; S(9): 0.4	1	2320			365400000	Light	Redundant	Not	0.809	365400000	358600000		54	9.60974e-05	0	43	2	807.847	1614.69	1.44	44.45	10483	10483	CAL27_CURCUMIN_pTy_R1.raw
1	GPNVKGEyDVTMPK	Y8;	Replicate 1	Unambiguous	AHNAK	NP_001611.1	79026	neuroblast differentiation-associated protein AHNAK isoform 1	1	1	61743954	Y8(Phospho)	1	Y(8): 100.0; T(11): 0.0	1	2779			23280000	Light	Redundant	Not	6.373	19210000	2391000		46	0.000806089	1	6	2	807.866	1614.73	1	48.03	11446	11446	CAL27_CURCUMIN_pTy_R1.raw
1	EYDRLyEEYTR	Y6;	Replicate 1	Unambiguous	PIK3R1	NP_001229395.1	5295	phosphatidylinositol 3-kinase regulatory subunit alpha isoform 4	5	1	335057534	Y6(Phospho)	1	Y(2): 0.0; Y(6): 100.0; Y(9): 0.0; T(10): 0.0	1	3572			12930000	Light	Unique	Used	0.885	12490000	11200000		28	0.041345	1	0	2	808.836	1616.66	0.61	52.61	12675	12675	CAL27_CURCUMIN_pTy_R1.raw
1	yESLTDPSKLDSGK	Y1;	Replicate 1	Unambiguous	HSP90AA1||HSP90AB1	NP_005339.3||NP_001258901.1	3320||3326	heat shock protein HSP 90-alpha isoform 2||heat shock protein HSP 90-beta isoform c	5	2	154146191;431822408	Y1(Phospho)	1	Y(1): 100.0; S(3): 0.0; T(5): 0.0; S(8): 0.0; S(12): 0.0	1	2544			17960000	Light	Redundant	Not	2.032	17080000	6671000		75	1.02534e-06	1	0	2	810.364	1619.72	0.41	46.4	11009	11009	CAL27_CURCUMIN_pTy_R1.raw
1	yESLTDPSKLDSGK	Y1;	Replicate 1	Unambiguous	HSP90AA1||HSP90AB1	NP_005339.3||NP_001258901.1	3320||3326	heat shock protein HSP 90-alpha isoform 2||heat shock protein HSP 90-beta isoform c	5	2	154146191;431822408	Y1(Phospho)	1	Y(1): 100.0; S(3): 0.0; T(5): 0.0; S(8): 0.0; S(12): 0.0	1	2554			12290000	Light	Redundant	Not	3.004	11460000	3028000		28	0.0421019	1	78	3	540.579	1619.72	1.2	46.08	10924	10924	CAL27_CURCUMIN_pTy_R1.raw
1	VGEEEHVySFPNK	Y8;	Replicate 1	Unambiguous	PXN	NP_002850.2	5829	paxillin isoform 1	3	1	170932516	S9(Phospho); K13(Label:13C(6))	1	Y(8): 99.6; S(9): 0.4	1	2338			256100000	Heavy	Redundant	Not	0.785	253200000	256100000		24	0.116088	0	17	3	540.906	1620.7	0.04	44.59	10521	10521	CAL27_CURCUMIN_pTy_R1.raw
1	VGEEEHVySFPNK	Y8;	Replicate 1	Unambiguous	PXN	NP_002850.2	5829	paxillin isoform 1	3	1	170932516	Y8(Phospho); K13(Label:13C(6))	1	Y(8): 99.6; S(9): 0.4	1	2320			358600000	Heavy	Redundant	Not	0.809	365400000	358600000		62	1.7017e-05	0	12	2	810.856	1620.7	0.47	44.44	10482	10482	CAL27_CURCUMIN_pTy_R1.raw
1	VGEEEHVySFPNK	Y8;	Replicate 1	Unambiguous	PXN	NP_002850.2	5829	paxillin isoform 1	3	1	170932516	Y8(Phospho); K13(Label:13C(6))	1	Y(8): 99.6; S(9): 0.4	1	2320			358600000	Heavy	Redundant	Not	0.809	365400000	358600000		78	4.55657e-07	0	2	2	810.856	1620.7	0.54	45.01	10634	10634	CAL27_CURCUMIN_pTy_R1.raw
1	VGEEEHVySFPNK	Y8;	Replicate 1	Unambiguous	PXN	NP_002850.2	5829	paxillin isoform 1	3	1	170932516	Y8(Phospho); K13(Label:13C(6))	1	Y(8): 99.6; S(9): 0.4	1	2320			358600000	Heavy	Redundant	Not	0.809	365400000	358600000		70	2.58099e-06	0	0	2	810.856	1620.71	0.92	45.54	10779	10779	CAL27_CURCUMIN_pTy_R1.raw
1	VGEEEHVySFPNK	Y8;	Replicate 1	Unambiguous	PXN	NP_002850.2	5829	paxillin isoform 1	3	1	170932516	S9(Phospho); K13(Label:13C(6))	1	Y(8): 99.6; S(9): 0.4	1	2338			256100000	Heavy	Redundant	Not	0.785	253200000	256100000		47	0.00059078	0	18	3	540.907	1620.71	1.17	45.11	10664	10664	CAL27_CURCUMIN_pTy_R1.raw
1	INSDDSNLyLTASK	Y9;	Replicate 1	Unambiguous	RAB34	NP_001243205.1	83871	ras-related protein Rab-34 isoform 6	6	1	372266169	Y9(Phospho)	1	S(3): 0.0; S(6): 0.0; Y(9): 100.0; T(11): 0.0; S(13): 0.0	1	3234		1	10430000	Light	Excluded by Method	Not	12.1136	5887000	385700		111	2.04702e-10	0	0	2	810.861	1620.72	0.04	50.46	12101	12101	CAL27_CURCUMIN_pTy_R1.raw
1	VMIyQDEVKLPAK	Y4;	Replicate 1	Unambiguous	PTRF	NP_036364.2	284119	polymerase I and transcript release factor	1	1	42734430	Y4(Phospho); K9(Label:13C(6)); K13(Label:13C(6))	1	Y(4): 100.0	1	5785			1140000	Heavy	Redundant	Not	1.213	1743000	1140000		70	2.00427e-06	1	16	2	813.426	1625.84	1.6	65.89	16223	16223	CAL27_CURCUMIN_pTy_R1.raw
1	yESLTDPSKLDSGK	Y1;	Replicate 1	Unambiguous	HSP90AA1||HSP90AB1	NP_005339.3||NP_001258901.1	3320||3326	heat shock protein HSP 90-alpha isoform 2||heat shock protein HSP 90-beta isoform c	5	2	154146191;431822408	Y1(Phospho); K9(Label:13C(6)); K14(Label:13C(6))	1	Y(1): 100.0; S(3): 0.0; T(5): 0.0; S(8): 0.0; S(12): 0.0	1	2544			6671000	Heavy	Redundant	Not	2.032	17080000	6671000		25	0.105952	1	79	2	816.383	1631.76	-0.62	46.02	10907	10907	CAL27_CURCUMIN_pTy_R1.raw
1	SSSSDEEYIyMNK	Y10;	Replicate 1	Unambiguous	AFAP1L2	NP_115939.1	84632	actin filament-associated protein 1-like 2 isoform 2	3	1	24308338	Y10(Phospho)	1	S(1): 0.0; S(2): 0.0; S(3): 0.0; S(4): 0.0; Y(8): 0.0; Y(10): 100.0	1	3583		1	4245000	Light	Excluded by Method	Not	6.57676	1422000	171600		68	3.27308e-06	0	53	2	816.81	1632.61	-0.29	52.67	12690	12690	CAL27_CURCUMIN_pTy_R1.raw
1	DySTLTSVSSHDSR	Y2;	Replicate 1	Unambiguous	ITGB4	NP_001005731.1	3691	integrin beta-4 isoform 3 precursor	2	1	54607033	Y2(Phospho)	1	Y(2): 100.0; S(3): 0.0; T(4): 0.0; T(6): 0.0; S(7): 0.0; S(9): 0.0; S(10): 0.0; S(13): 0.0	1	1357			40030000	Light	Redundant	Not	1.353	40030000	23490000		35	0.00591453	0	39	3	545.56	1634.67	-1.65	38.06	8760	8760	CAL27_CURCUMIN_pTy_R1.raw
1	DySTLTSVSSHDSR	Y2;	Replicate 1	Unambiguous	ITGB4	NP_001005731.1	3691	integrin beta-4 isoform 3 precursor	2	1	54607033	Y2(Phospho)	1	Y(2): 100.0; S(3): 0.0; T(4): 0.0; T(6): 0.0; S(7): 0.0; S(9): 0.0; S(10): 0.0; S(13): 0.0	1	1298			67220000	Light	Redundant	Not	1.3	66960000	40890000		77	4.04535e-07	0	0	2	817.838	1634.67	0.19	37.63	8643	8643	CAL27_CURCUMIN_pTy_R1.raw
1	DySTLTSVSSHDSR	Y2;	Replicate 1	Unambiguous	ITGB4	NP_001005731.1	3691	integrin beta-4 isoform 3 precursor	2	1	54607033	Y2(Phospho)	1	Y(2): 100.0; S(3): 0.0; T(4): 0.0; T(6): 0.0; S(7): 0.0; S(9): 0.0; S(10): 0.0; S(13): 0.0	1	1298			67220000	Light	Redundant	Not	1.3	66960000	40890000		84	8.01598e-08	0	0	2	817.839	1634.67	0.56	38.15	8783	8783	CAL27_CURCUMIN_pTy_R1.raw
1	DySTLTSVSSHDSR	Y2;	Replicate 1	Unambiguous	ITGB4	NP_001005731.1	3691	integrin beta-4 isoform 3 precursor	2	1	54607033	S3(Phospho); R14(Label:13C(6))	1	Y(2): 100.0; S(3): 0.0; T(4): 0.0; T(6): 0.0; S(7): 0.0; S(9): 0.0; S(10): 0.0; S(13): 0.0	1	1298			40890000	Heavy	Redundant	Not	1.3	66960000	40890000		47	0.000459178	0	14	2	820.848	1640.69	-1.07	37.64	8646	8646	CAL27_CURCUMIN_pTy_R1.raw
1	DySTLTSVSSHDSR	Y2;	Replicate 1	Unambiguous	ITGB4	NP_001005731.1	3691	integrin beta-4 isoform 3 precursor	2	1	54607033	Y2(Phospho); R14(Label:13C(6))	1	Y(2): 100.0; S(3): 0.0; T(4): 0.0; T(6): 0.0; S(7): 0.0; S(9): 0.0; S(10): 0.0; S(13): 0.0	1	1298			40890000	Heavy	Redundant	Not	1.3	66960000	40890000		89	2.89028e-08	0	6	2	820.848	1640.69	-0.4	38.18	8793	8793	CAL27_CURCUMIN_pTy_R1.raw
1	DySTLTSVSSHDSR	Y2;	Replicate 1	Unambiguous	ITGB4	NP_001005731.1	3691	integrin beta-4 isoform 3 precursor	2	1	54607033	Y2(Phospho); R14(Label:13C(6))	1	Y(2): 100.0; S(3): 0.0; T(4): 0.0; T(6): 0.0; S(7): 0.0; S(9): 0.0; S(10): 0.0; S(13): 0.0	1	1357			24050000	Heavy	Redundant	Not	1.353	40030000	23490000		42	0.00165368	0	52	3	547.568	1640.69	-0.3	38	8745	8745	CAL27_CURCUMIN_pTy_R1.raw
1	LQDEANYHLyGSR	Y10;	Replicate 1	Unambiguous	RIPK1	NP_003795.2	8737	receptor-interacting serine/threonine-protein kinase 1	1	1	57242761	Y10(Phospho)	1	Y(7): 0.0; Y(10): 99.6; S(12): 0.4	1	2543	1		3897000	Light	Excluded by Method	Not	100	2000000	5315		52	0.000125441	0	0	2	823.354	1645.7	0.64	46.01	10906	10906	CAL27_CURCUMIN_pTy_R1.raw
1	RAQIPEGDyLSYR	Y9;	Replicate 1	Unambiguous	ERBB2IP	NP_001006600.1	55914	protein LAP2 isoform 7	6	1	55770895	Y9(Phospho)	1	Y(9): 100.0; S(11): 0.0; Y(12): 0.0	1	4624			3177000	Light	Redundant	Not	4.045	2690000	527600		27	0.0640676	1	51	3	549.922	1647.75	0.12	58.95	14365	14365	CAL27_CURCUMIN_pTy_R1.raw
1	LEPQIASASEyAHR	Y11;	Replicate 1	Unambiguous	PLIN3	NP_001157666.1	10226	perilipin-3 isoform 3	3	1	255958306	Y11(Phospho)	1	S(7): 0.0; S(9): 0.0; Y(11): 100.0	1	2786			13150000	Light	Redundant	Not	4.427	12690000	2274000		46	0.00075879	0	31	3	551.255	1651.75	1.38	47.53	11309	11309	CAL27_CURCUMIN_pTy_R1.raw
2	HTDDEMtGyVATR	T7; Y9;	Replicate 1	Unambiguous	MAPK14	NP_620582.1	1432	mitogen-activated protein kinase 14 isoform 3	4	1	20986514	T7(Phospho); Y9(Phospho)	1	T(2): 0.0; T(7): 99.2; Y(9): 99.2; T(12): 1.7	1	969			36760000	Light	Redundant	Not	0.82	36420000	35230000		62	1.39945e-05	0	23	3	552.532	1655.58	0.74	35.78	8141	8141	CAL27_CURCUMIN_pTy_R1.raw
2	HTDDEMtGyVATR	T7; Y9;	Replicate 1	Unambiguous	MAPK14	NP_620582.1	1432	mitogen-activated protein kinase 14 isoform 3	4	1	20986514	T7(Phospho); Y9(Phospho)	1	T(2): 0.0; T(7): 99.2; Y(9): 99.2; T(12): 1.7	1	969			36760000	Light	Redundant	Not	0.82	36420000	35230000		24	0.0854981	0	55	3	552.532	1655.58	0.96	35.16	7975	7975	CAL27_CURCUMIN_pTy_R1.raw
2	HTDDEMtGyVATR	T7; Y9;	Replicate 1	Unambiguous	MAPK14	NP_620582.1	1432	mitogen-activated protein kinase 14 isoform 3	4	1	20986514	T7(Phospho); Y9(Phospho)	1	T(2): 0.0; T(7): 99.2; Y(9): 99.2; T(12): 1.7	1	926			145100000	Light	Redundant	Not	0.827	145100000	139100000		61	1.60309e-05	0	0	2	828.295	1655.58	1.15	35.84	8158	8158	CAL27_CURCUMIN_pTy_R1.raw
2	HTDDEMtGyVATR	T7; Y9;	Replicate 1	Unambiguous	MAPK14	NP_620582.1	1432	mitogen-activated protein kinase 14 isoform 3	4	1	20986514	T7(Phospho); Y9(Phospho)	1	T(2): 0.0; T(7): 99.2; Y(9): 99.2; T(12): 1.7	1	926			145100000	Light	Redundant	Not	0.827	145100000	139100000		57	4.46639e-05	0	10	2	828.295	1655.58	1.45	34.79	7876	7876	CAL27_CURCUMIN_pTy_R1.raw
2	HTDDEMtGyVATR	T7; Y9;	Replicate 1	Unambiguous	MAPK14	NP_620582.1	1432	mitogen-activated protein kinase 14 isoform 3	4	1	20986514	T7(Phospho); Y9(Phospho)	1	T(2): 0.0; T(7): 99.2; Y(9): 99.2; T(12): 1.7	1	926			145100000	Light	Redundant	Not	0.827	145100000	139100000		66	5.53295e-06	0	0	2	828.295	1655.58	1.45	35.31	8014	8014	CAL27_CURCUMIN_pTy_R1.raw
2	HTDDEMtGyVATR	T7; Y9;	Replicate 1	Unambiguous	MAPK14	NP_620582.1	1432	mitogen-activated protein kinase 14 isoform 3	4	1	20986514	T7(Phospho); Y9(Phospho)	1	T(2): 0.0; T(7): 99.2; Y(9): 99.2; T(12): 1.7	1	926			145100000	Light	Redundant	Not	0.827	145100000	139100000		29	0.026119	0	0	2	828.296	1655.58	1.74	36.37	8303	8303	CAL27_CURCUMIN_pTy_R1.raw
2	HTDDEMtGyVATR	T7; Y9;	Replicate 1	Unambiguous	MAPK14	NP_620582.1	1432	mitogen-activated protein kinase 14 isoform 3	4	1	20986514	T7(Phospho); Y9(Phospho); R13(Label:13C(6))	1	T(2): 0.0; T(7): 99.2; Y(9): 99.2; T(12): 1.7	1	969			35230000	Heavy	Redundant	Not	0.82	36420000	35230000		54	7.22698e-05	0	46	3	554.538	1661.6	-1.13	35.19	7982	7982	CAL27_CURCUMIN_pTy_R1.raw
2	HTDDEMtGyVATR	T7; Y9;	Replicate 1	Unambiguous	MAPK14	NP_620582.1	1432	mitogen-activated protein kinase 14 isoform 3	4	1	20986514	T7(Phospho); Y9(Phospho); R13(Label:13C(6))	1	T(2): 0.0; T(7): 99.2; Y(9): 99.2; T(12): 1.7	1	926			139300000	Heavy	Redundant	Not	0.827	145100000	139100000		21	0.148579	0	0	2	831.304	1661.6	-0.09	36.47	8329	8329	CAL27_CURCUMIN_pTy_R1.raw
2	HTDDEMtGyVATR	T7; Y9;	Replicate 1	Unambiguous	MAPK14	NP_620582.1	1432	mitogen-activated protein kinase 14 isoform 3	4	1	20986514	T7(Phospho); Y9(Phospho); R13(Label:13C(6))	1	T(2): 0.0; T(7): 99.2; Y(9): 99.2; T(12): 1.7	1	969			35230000	Heavy	Redundant	Not	0.82	36420000	35230000		51	0.000171774	0	14	3	554.539	1661.6	-0.03	35.82	8152	8152	CAL27_CURCUMIN_pTy_R1.raw
2	HTDDEMtGyVATR	T7; Y9;	Replicate 1	Unambiguous	MAPK14	NP_620582.1	1432	mitogen-activated protein kinase 14 isoform 3	4	1	20986514	T7(Phospho); Y9(Phospho); R13(Label:13C(6))	1	T(2): 0.0; T(7): 99.2; Y(9): 99.2; T(12): 1.7	1	926			139300000	Heavy	Redundant	Not	0.827	145100000	139100000		71	1.64043e-06	0	4	2	831.305	1661.6	0.86	35.9	8176	8176	CAL27_CURCUMIN_pTy_R1.raw
2	HTDDEMtGyVATR	T7; Y9;	Replicate 1	Unambiguous	MAPK14	NP_620582.1	1432	mitogen-activated protein kinase 14 isoform 3	4	1	20986514	T7(Phospho); Y9(Phospho); R13(Label:13C(6))	1	T(2): 0.0; T(7): 99.2; Y(9): 99.2; T(12): 1.7	1	926			139300000	Heavy	Unique	Used	0.827	145100000	139100000		19	0.243757	0	29	2	831.305	1661.6	1.38	34.85	7894	7894	CAL27_CURCUMIN_pTy_R1.raw
2	HTDDEMtGyVATR	T7; Y9;	Replicate 1	Unambiguous	MAPK14	NP_620582.1	1432	mitogen-activated protein kinase 14 isoform 3	4	1	20986514	T7(Phospho); Y9(Phospho); R13(Label:13C(6))	1	T(2): 0.0; T(7): 99.2; Y(9): 99.2; T(12): 1.7	1	926			139300000	Heavy	Redundant	Not	0.827	145100000	139100000		71	1.74163e-06	0	4	2	831.305	1661.6	1.38	35.37	8032	8032	CAL27_CURCUMIN_pTy_R1.raw
1	GESAGyMEPYEAQR	Y6;	Replicate 1	Unambiguous	SHB	NP_003019.2	6461	SH2 domain-containing adapter protein B	1	1	106879210	Y6(Phospho)	1	S(3): 0.6; Y(6): 99.4; Y(10): 0.0	1	2542			16180000	Light	Redundant	Not	0.596	16180000	21530000		41	0.00158839	0	51	2	834.324	1667.64	-0.14	46.01	10905	10905	CAL27_CURCUMIN_pTy_R1.raw
1	SYSPyDMLESIRK	Y5;	Replicate 1	Unambiguous	ANXA2	NP_001002857.1	302	annexin A2 isoform 2	2	1	50845386	Y5(Phospho)	1	S(1): 0.0; Y(2): 0.0; S(3): 0.0; Y(5): 100.0; S(10): 0.0	1				6673000		No Quan Values	Not					29	0.0368232	1	30	2	834.871	1668.73	0.35	92.98	23461	23461	CAL27_CURCUMIN_pTy_R1.raw
2	HTDDEMtGyVATR	T7; Y9;	Replicate 1	Unambiguous	MAPK14	NP_620582.1	1432	mitogen-activated protein kinase 14 isoform 3	4	1	20986514	M6(Oxidation); T7(Phospho); Y9(Phospho)	1	T(2): 0.0; T(7): 99.2; Y(9): 99.2; T(12): 1.7	1	1029			3306000	Light	Unique	Used	0.948	3306000	2767000		21	0.151341	0	0	2	836.292	1671.58	0.53	35.8	8147	8147	CAL27_CURCUMIN_pTy_R1.raw
2	HTDDEMtGyVATR	T7; Y9;	Replicate 1	Unambiguous	MAPK14	NP_620582.1	1432	mitogen-activated protein kinase 14 isoform 3	4	1	20986514	M6(Oxidation); T7(Phospho); Y9(Phospho)	1	T(2): 0.0; T(7): 99.2; Y(9): 99.2; T(12): 1.7	1	970			2888000	Light	Unique	Used	0.692	2888000	3313000		24	0.0814623	0	18	2	836.292	1671.58	0.82	35.26	8000	8000	CAL27_CURCUMIN_pTy_R1.raw
1	GESAGyMEPYEAQR	Y6;	Replicate 1	Unambiguous	SHB	NP_003019.2	6461	SH2 domain-containing adapter protein B	1	1	106879210	Y6(Phospho); R14(Label:13C(6))	1	S(3): 0.6; Y(6): 99.4; Y(10): 0.0	1	2542			21530000	Heavy	Redundant	Not	0.596	16180000	21530000		59	2.79226e-05	0	26	2	837.335	1673.66	0.81	46.21	10958	10958	CAL27_CURCUMIN_pTy_R1.raw
1	ISIGGGSCAISGGyGSR	Y14;	Replicate 1	Unambiguous	KRT6A	NP_005545.1	3853	keratin, type II cytoskeletal 6A	3	1	5031839	C8(Carbamidomethyl); Y14(Phospho)	1	S(2): 0.0; S(7): 0.0; S(11): 0.0; Y(14): 99.3; S(16): 0.7	1	3807			8168000	Light	Redundant	Not	3.94	7001000	1410000		76	6.7923e-07	0	17	2	839.867	1678.73	1.08	54	13049	13049	CAL27_CURCUMIN_pTy_R1.raw
1	EEPIyIITEYMAK	Y5;	Replicate 1	Unambiguous	LYN	NP_001104567.1	4067	tyrosine-protein kinase Lyn isoform B	2	1	162287326	Y5(Phospho)	1	Y(5): 100.0; T(8): 0.0; Y(10): 0.0	1	15302			5734000	Light	Redundant	Not	0.576	5734000	7904000		38	0.00378555	0	39	2	840.387	1679.77	1.59	125	32058	32058	CAL27_CURCUMIN_pTy_R1.raw
1	FHPEPyGLEDDQR	Y6;	Replicate 1	Unambiguous	CTNND1	NP_001193818.1	1500	catenin delta-1 isoform 2A	15	1	332688218	Y6(Phospho)	1	Y(6): 100.0	1	3519			23910000	Light	Unique	Used	7.151	19330000	2144000		25	0.0622238	0	0	2	841.847	1682.69	1.4	52.3	12591	12591	CAL27_CURCUMIN_pTy_R1.raw
1	ISIGGGSCAISGGyGSR	Y14;	Replicate 1	Unambiguous	KRT6A	NP_005545.1	3853	keratin, type II cytoskeletal 6A	3	1	5031839	C8(Carbamidomethyl); S16(Phospho); R17(Label:13C(6))	1	S(2): 0.0; S(7): 0.0; S(11): 0.0; Y(14): 99.3; S(16): 0.7	1	3807			1410000	Heavy	Redundant	Not	3.94	7001000	1410000		40	0.00254931	0	13	2	842.879	1684.75	3.47	54.16	13092	13092	CAL27_CURCUMIN_pTy_R1.raw
1	EEPIyIITEYMAK	Y5;	Replicate 1	Unambiguous	LYN	NP_001104567.1	4067	tyrosine-protein kinase Lyn isoform B	2	1	162287326	Y5(Phospho); K13(Label:13C(6))	1	Y(5): 100.0; T(8): 0.0; Y(10): 0.0	1	15302			9737000	Heavy	Redundant	Not	0.576	5734000	7904000		28	0.0382944	0	59	2	843.396	1685.79	0.79	124.78	31999	31999	CAL27_CURCUMIN_pTy_R1.raw
1	GESAGyMEPYEAQR	Y6;	Replicate 1	Unambiguous	SHB	NP_003019.2	6461	SH2 domain-containing adapter protein B	1	1	106879210	Y6(Phospho); M7(Oxidation); R14(Label:13C(6))	1	S(3): 0.6; Y(6): 99.4; Y(10): 0.0	1						No Quan Values	Not					41	0.00162913	0	0	2	845.332	1689.66	0.2	46.18	10951	10951	CAL27_CURCUMIN_pTy_R1.raw
1	EPLSSETQySVDTR	Y9;	Replicate 1	Unambiguous	PIP5K1A	NP_001129109.1	8394	phosphatidylinositol 4-phosphate 5-kinase type-1 alpha isoform 4	4	1	208431776	Y9(Phospho)	1	S(4): 0.0; S(5): 0.0; T(7): 0.6; Y(9): 98.8; S(10): 0.6; T(13): 0.0	1	2204	1		1266000	Light	Unique	Used	75.818	507800	5315		49	0.00023494	0	0	2	846.361	1691.71	-0.69	43.77	10301	10301	CAL27_CURCUMIN_pTy_R1.raw
1	TQyNQVPSEDFER	Y3;	Replicate 1	Unambiguous	CXADR	NP_001193995.1	1525	coxsackievirus and adenovirus receptor isoform 5 precursor	2	1	333470709	Y3(Phospho)	1	T(1): 0.0; Y(3): 100.0; S(8): 0.0	1	3340		1	12890000	Light	Excluded by Method	Not	8.89016	5034000	449400		70	2.68723e-06	0	29	2	846.849	1692.69	0.83	51.12	12276	12276	CAL27_CURCUMIN_pTy_R1.raw
1	LGAAPEEESAyVAGEK	Y11;	Replicate 1	Unambiguous	NSFL1C	NP_057227.2	55968	NSFL1 cofactor p47 isoform a	2	1	20149635	Y11(Phospho)	1	S(9): 0.5; Y(11): 99.5	1	2680	1		3593000	Light	Excluded by Method	Not	100	1970000	5315		70	2.70151e-06	0	0	2	850.874	1700.74	-0.54	46.85	11132	11132	CAL27_CURCUMIN_pTy_R1.raw
2	SSGPyGGGGQyFAKPR	Y5; Y11;	Replicate 1	Unambiguous	HNRNPA1	NP_002127.1	3178	heterogeneous nuclear ribonucleoprotein A1 isoform a	2	1	4504445	Y11(Phospho)	1	S(1): 0.0; S(2): 0.0; Y(5): 100.0; Y(11): 100.0	1	2471		1	35760000	Light	Excluded by Method	Not	4.98227	15600000	2485000		23	0.14141	0	29	3	570.254	1708.75	-0.26	46.12	10935	10935	CAL27_CURCUMIN_pTy_R1.raw
2	SSGPyGGGGQyFAKPR	Y5; Y11;	Replicate 1	Unambiguous	HNRNPA1	NP_002127.1	3178	heterogeneous nuclear ribonucleoprotein A1 isoform a	2	1	4504445	Y5(Phospho)	1	S(1): 0.0; S(2): 0.0; Y(5): 100.0; Y(11): 100.0	1	2323		1	135100000	Light	Excluded by Method	Not	15.148	55370000	2901000		23	0.13947	0	37	3	570.254	1708.75	-0.26	45.02	10639	10639	CAL27_CURCUMIN_pTy_R1.raw
2	SSGPyGGGGQyFAKPR	Y5; Y11;	Replicate 1	Unambiguous	HNRNPA1	NP_002127.1	3178	heterogeneous nuclear ribonucleoprotein A1 isoform a	2	1	4504445	Y11(Phospho)	1	S(1): 0.0; S(2): 0.0; Y(5): 100.0; Y(11): 100.0	1	2471		1	35760000	Light	Excluded by Method	Not	4.98227	15600000	2485000		43	0.0012605	0	26	3	570.254	1708.75	0.06	45.57	10788	10788	CAL27_CURCUMIN_pTy_R1.raw
2	SSGPyGGGGQyFAKPR	Y5; Y11;	Replicate 1	Unambiguous	HNRNPA1	NP_002127.1	3178	heterogeneous nuclear ribonucleoprotein A1 isoform a	2	1	4504445	Y5(Phospho)	1	S(1): 0.0; S(2): 0.0; Y(5): 100.0; Y(11): 100.0	1	2323		1	135100000	Light	Excluded by Method	Not	15.148	55370000	2901000		33	0.0142742	0	18	3	570.254	1708.75	0.17	44.48	10491	10491	CAL27_CURCUMIN_pTy_R1.raw
2	SSGPyGGGGQyFAKPR	Y5; Y11;	Replicate 1	Unambiguous	HNRNPA1	NP_002127.1	3178	heterogeneous nuclear ribonucleoprotein A1 isoform a	2	1	4504445	Y11(Phospho)	1	S(1): 0.0; S(2): 0.0; Y(5): 100.0; Y(11): 100.0	1	2453			20770000	Light	Redundant	Not	7.213	16100000	1772000		75	9.21261e-07	0	0	2	854.878	1708.75	0.86	45.99	10900	10900	CAL27_CURCUMIN_pTy_R1.raw
2	SSGPyGGGGQyFAKPR	Y5; Y11;	Replicate 1	Unambiguous	HNRNPA1	NP_002127.1	3178	heterogeneous nuclear ribonucleoprotein A1 isoform a	2	1	4504445	Y5(Phospho)	1	S(1): 0.0; S(2): 0.0; Y(5): 100.0; Y(11): 100.0	1	2291			58180000	Light	Redundant	Not	14.259	46440000	2585000		69	3.94805e-06	0	0	2	854.878	1708.75	1	44.82	10584	10584	CAL27_CURCUMIN_pTy_R1.raw
2	SSGPyGGGGQyFAKPR	Y5; Y11;	Replicate 1	Unambiguous	HNRNPA1	NP_002127.1	3178	heterogeneous nuclear ribonucleoprotein A1 isoform a	2	1	4504445	Y11(Phospho)	1	S(1): 0.0; S(2): 0.0; Y(5): 100.0; Y(11): 100.0	1	2453			20770000	Light	Redundant	Not	7.213	16100000	1772000		59	3.51061e-05	0	0	2	854.879	1708.75	1.07	45.44	10753	10753	CAL27_CURCUMIN_pTy_R1.raw
2	SSGPyGGGGQyFAKPR	Y5; Y11;	Replicate 1	Unambiguous	HNRNPA1	NP_002127.1	3178	heterogeneous nuclear ribonucleoprotein A1 isoform a	2	1	4504445	Y5(Phospho)	1	S(1): 0.0; S(2): 0.0; Y(5): 100.0; Y(11): 100.0	1	2291			58180000	Light	Unique	Used	14.259	46440000	2585000		39	0.00339486	0	34	2	854.879	1708.75	2.07	44.27	10435	10435	CAL27_CURCUMIN_pTy_R1.raw
1	yMSPEQISSQDYGK	Y1;	Replicate 1	Unambiguous	EIF2AK2	NP_001129124.1	5610	interferon-induced, double-stranded RNA-activated protein kinase isoform b	2	1	208431829	Y1(Phospho)	1	Y(1): 100.0; S(3): 0.0; S(8): 0.0; S(9): 0.0; Y(12): 0.0	1	3802	1		2082000	Light	Excluded by Method	Not	100	1337000	5315		38	0.00364099	0	0	2	856.849	1712.69	2.3	53.97	13039	13039	CAL27_CURCUMIN_pTy_R1.raw
2	SSGPyGGGGQyFAKPR	Y5; Y11;	Replicate 1	Unambiguous	HNRNPA1	NP_002127.1	3178	heterogeneous nuclear ribonucleoprotein A1 isoform a	2	1	4504445	Y11(Phospho); K14(Label:13C(6)); R16(Label:13C(6))	1	S(1): 0.0; S(2): 0.0; Y(5): 100.0; Y(11): 100.0	1	2471		1	2485000	Heavy	Excluded by Method	Not	4.98227	15600000	2485000		24	0.123183	0	57	3	574.268	1720.79	1.14	45.77	10841	10841	CAL27_CURCUMIN_pTy_R1.raw
2	SSGPyGGGGQyFAKPR	Y5; Y11;	Replicate 1	Unambiguous	HNRNPA1	NP_002127.1	3178	heterogeneous nuclear ribonucleoprotein A1 isoform a	2	1	4504445	Y5(Phospho); K14(Label:13C(6)); R16(Label:13C(6))	1	S(1): 0.0; S(2): 0.0; Y(5): 100.0; Y(11): 100.0	1	2291			2585000	Heavy	Redundant	Not	14.259	46440000	2585000		26	0.0841253	0	8	2	860.9	1720.79	2.71	44.56	10514	10514	CAL27_CURCUMIN_pTy_R1.raw
1	DySTVSASPTALSTLK	Y2;	Replicate 1	Unambiguous	LOC102725117	XP_006726519.1	102725117	rho guanine nucleotide exchange factor 5-like	2	1	578844357	Y2(Phospho)	1	Y(2): 100.0; S(3): 0.0; T(4): 0.0; S(6): 0.0; S(8): 0.0; T(10): 0.0; S(13): 0.0; T(14): 0.0	1	5969			13540000	Light	Redundant	Not	1.677	10160000	4806000		51	0.000247336	0	43	2	860.906	1720.8	0.34	66.87	16483	16483	CAL27_CURCUMIN_pTy_R1.raw
1	DySTVSASPTALSTLK	Y2;	Replicate 1	Unambiguous	LOC102725117	XP_006726519.1	102725117	rho guanine nucleotide exchange factor 5-like	2	1	578844357	Y2(Phospho); K16(Label:13C(6))	1	Y(2): 100.0; S(3): 0.0; T(4): 0.0; S(6): 0.0; S(8): 0.0; T(10): 0.0; S(13): 0.0; T(14): 0.0	1	5969			4806000	Heavy	Redundant	Not	1.677	10160000	4806000		54	0.000123892	0	35	2	863.916	1726.82	0	67.07	16538	16538	CAL27_CURCUMIN_pTy_R1.raw
1	QTSAyNISNSSTFTK	Y5;	Replicate 1	Unambiguous	PLXNA1	NP_115618.3	5361	plexin-A1 precursor	1	1	262118282	Y5(Phospho)	1	T(2): 0.0; S(3): 0.5; Y(5): 99.5; S(8): 0.0; S(10): 0.0; S(11): 0.0; T(12): 0.0; T(14): 0.0	1	2904	1		3431000	Light	Excluded by Method	Not	100	1717000	5315		68	3.96078e-06	0	34	2	864.879	1728.75	1.73	48.33	11528	11528	CAL27_CURCUMIN_pTy_R1.raw
2	yVDSEGHLyTVPIR	Y1; Y9;	Replicate 1	Unambiguous	CAV1	NP_001744.2	857	caveolin-1 isoform alpha	1	1	15451856	T10(Phospho)	1	Y(1): 100.0; S(4): 0.0; Y(9): 98.9; T(10): 1.1	1	5005			577400000	Light	Redundant	Not	1.49	577400000	307400000		29	0.0351465	0	24	3	576.937	1728.8	-0.9	61.14	14952	14952	CAL27_CURCUMIN_pTy_R1.raw
2	yVDSEGHLyTVPIR	Y1; Y9;	Replicate 1	Unambiguous	CAV1	NP_001744.2	857	caveolin-1 isoform alpha	1	1	15451856	Y1(Phospho)	1	Y(1): 100.0; S(4): 0.0; Y(9): 98.9; T(10): 1.1	1	5843			201800000	Light	Redundant	Not	1.172	201800000	136600000		48	0.0004785	0	2	3	576.938	1728.8	-0.05	66.73	16446	16446	CAL27_CURCUMIN_pTy_R1.raw
2	yVDSEGHLyTVPIR	Y1; Y9;	Replicate 1	Unambiguous	CAV1	NP_001744.2	857	caveolin-1 isoform alpha	1	1	15451856	Y9(Phospho)	1	Y(1): 100.0; S(4): 0.0; Y(9): 98.9; T(10): 1.1	1	5001			422800000	Light	Redundant	Not	1.462	422800000	229400000		57	6.0903e-05	0	0	2	864.904	1728.8	0.24	61.1	14940	14940	CAL27_CURCUMIN_pTy_R1.raw
2	yVDSEGHLyTVPIR	Y1; Y9;	Replicate 1	Unambiguous	CAV1	NP_001744.2	857	caveolin-1 isoform alpha	1	1	15451856	Y1(Phospho)	1	Y(1): 100.0; S(4): 0.0; Y(9): 98.9; T(10): 1.1	1	5843			201800000	Light	Redundant	Not	1.172	201800000	136600000		42	0.00174995	0	16	3	576.938	1728.8	0.79	66.17	16295	16295	CAL27_CURCUMIN_pTy_R1.raw
2	yVDSEGHLyTVPIR	Y1; Y9;	Replicate 1	Unambiguous	CAV1	NP_001744.2	857	caveolin-1 isoform alpha	1	1	15451856	Y9(Phospho)	1	Y(1): 100.0; S(4): 0.0; Y(9): 98.9; T(10): 1.1	1	5001			422800000	Light	Redundant	Not	1.462	422800000	229400000		25	0.0913182	0	13	2	864.904	1728.8	1.08	62.3	15260	15260	CAL27_CURCUMIN_pTy_R1.raw
2	yVDSEGHLyTVPIR	Y1; Y9;	Replicate 1	Unambiguous	CAV1	NP_001744.2	857	caveolin-1 isoform alpha	1	1	15451856	Y1(Phospho)	1	Y(1): 100.0; S(4): 0.0; Y(9): 98.9; T(10): 1.1	1	5846			103600000	Light	Redundant	Not	1.201	103600000	68410000		83	1.50747e-07	0	0	2	864.904	1728.8	1.3	66.18	16298	16298	CAL27_CURCUMIN_pTy_R1.raw
2	yVDSEGHLyTVPIR	Y1; Y9;	Replicate 1	Unambiguous	CAV1	NP_001744.2	857	caveolin-1 isoform alpha	1	1	15451856	Y1(Phospho)	1	Y(1): 100.0; S(4): 0.0; Y(9): 98.9; T(10): 1.1	1	5846			103600000	Light	Redundant	Not	1.201	103600000	68410000		69	3.43245e-06	0	8	2	864.905	1728.8	1.44	66.76	16455	16455	CAL27_CURCUMIN_pTy_R1.raw
2	yVDSEGHLyTVPIR	Y1; Y9;	Replicate 1	Unambiguous	CAV1	NP_001744.2	857	caveolin-1 isoform alpha	1	1	15451856	T10(Phospho)	1	Y(1): 100.0; S(4): 0.0; Y(9): 98.9; T(10): 1.1	1	5005			577400000	Light	Redundant	Not	1.49	577400000	307400000		38	0.00442809	0	3	3	576.939	1728.8	2.59	61.69	15098	15098	CAL27_CURCUMIN_pTy_R1.raw
2	yVDSEGHLyTVPIR	Y1; Y9;	Replicate 1	Unambiguous	CAV1	NP_001744.2	857	caveolin-1 isoform alpha	1	1	15451856	Y9(Phospho)	1	Y(1): 100.0; S(4): 0.0; Y(9): 98.9; T(10): 1.1	1	5001			422800000	Light	Redundant	Not	1.462	422800000	229400000		77	5.73652e-07	0	0	2	864.906	1728.8	2.85	61.69	15099	15099	CAL27_CURCUMIN_pTy_R1.raw
1	ENDyESISDLQQGR	Y4;	Replicate 1	Unambiguous	PAG1	NP_060910.3	55824	phosphoprotein associated with glycosphingolipid-enriched microdomains 1	1	1	63054864	Y4(Phospho)	1	Y(4): 100.0; S(6): 0.0; S(8): 0.0	1	3799		1	2367000	Light	Excluded by Method	Not	7.16633	1740000	192700		69	2.34998e-06	0	59	2	867.355	1733.7	0.98	53.95	13035	13035	CAL27_CURCUMIN_pTy_R1.raw
2	yVDSEGHLyTVPIR	Y1; Y9;	Replicate 1	Unambiguous	CAV1	NP_001744.2	857	caveolin-1 isoform alpha	1	1	15451856	Y1(Phospho); R14(Label:13C(6))	1	Y(1): 100.0; S(4): 0.0; Y(9): 98.9; T(10): 1.1	1	5843			136600000	Heavy	Redundant	Not	1.172	201800000	136600000		53	0.000141619	0	14	3	578.944	1734.82	-1.21	66.86	16482	16482	CAL27_CURCUMIN_pTy_R1.raw
2	yVDSEGHLyTVPIR	Y1; Y9;	Replicate 1	Unambiguous	CAV1	NP_001744.2	857	caveolin-1 isoform alpha	1	1	15451856	Y9(Phospho); R14(Label:13C(6))	1	Y(1): 100.0; S(4): 0.0; Y(9): 98.9; T(10): 1.1	1	5005			307400000	Heavy	Redundant	Not	1.49	577400000	307400000		34	0.00956703	0	11	3	578.944	1734.82	-0.68	61.82	15133	15133	CAL27_CURCUMIN_pTy_R1.raw
2	yVDSEGHLyTVPIR	Y1; Y9;	Replicate 1	Unambiguous	CAV1	NP_001744.2	857	caveolin-1 isoform alpha	1	1	15451856	Y1(Phospho); R14(Label:13C(6))	1	Y(1): 100.0; S(4): 0.0; Y(9): 98.9; T(10): 1.1	1	5843			136600000	Heavy	Redundant	Not	1.172	201800000	136600000		39	0.00300408	0	16	3	578.945	1734.82	-0.26	66.3	16331	16331	CAL27_CURCUMIN_pTy_R1.raw
2	yVDSEGHLyTVPIR	Y1; Y9;	Replicate 1	Unambiguous	CAV1	NP_001744.2	857	caveolin-1 isoform alpha	1	1	15451856	T10(Phospho); R14(Label:13C(6))	1	Y(1): 100.0; S(4): 0.0; Y(9): 98.9; T(10): 1.1	1	5001			229400000	Heavy	Redundant	Not	1.462	422800000	229400000		72	1.35585e-06	0	4	2	867.914	1734.82	0.17	61.78	15122	15122	CAL27_CURCUMIN_pTy_R1.raw
2	yVDSEGHLyTVPIR	Y1; Y9;	Replicate 1	Unambiguous	CAV1	NP_001744.2	857	caveolin-1 isoform alpha	1	1	15451856	T10(Phospho); R14(Label:13C(6))	1	Y(1): 100.0; S(4): 0.0; Y(9): 98.9; T(10): 1.1	1	5005			307400000	Heavy	Redundant	Not	1.49	577400000	307400000		38	0.00352195	0	27	3	578.945	1734.82	0.59	61.22	14971	14971	CAL27_CURCUMIN_pTy_R1.raw
2	yVDSEGHLyTVPIR	Y1; Y9;	Replicate 1	Unambiguous	CAV1	NP_001744.2	857	caveolin-1 isoform alpha	1	1	15451856	T10(Phospho); R14(Label:13C(6))	1	Y(1): 100.0; S(4): 0.0; Y(9): 98.9; T(10): 1.1	1	5001			229400000	Heavy	Redundant	Not	1.462	422800000	229400000		41	0.00191874	0	0	2	867.914	1734.82	0.81	61.17	14959	14959	CAL27_CURCUMIN_pTy_R1.raw
2	yVDSEGHLyTVPIR	Y1; Y9;	Replicate 1	Unambiguous	CAV1	NP_001744.2	857	caveolin-1 isoform alpha	1	1	15451856	Y1(Phospho); R14(Label:13C(6))	1	Y(1): 100.0; S(4): 0.0; Y(9): 98.9; T(10): 1.1	1	5846			68410000	Heavy	Redundant	Not	1.201	103600000	68410000		78	3.89028e-07	0	9	2	867.915	1734.82	1.44	66.77	16458	16458	CAL27_CURCUMIN_pTy_R1.raw
1	HVHLENATEyATLR	Y10;	Replicate 1	Unambiguous	C11orf52	NP_542390.2	91894	uncharacterized protein C11orf52	1	1	131889517	Y10(Phospho); R14(Label:13C(6))	1	T(8): 0.0; Y(10): 99.6; T(12): 0.4	1	3688			4922000	Heavy	Redundant	Not	0.314	1704000	4307000		27	0.0547477	0	35	3	580.612	1739.82	-0.29	53.3	12859	12859	CAL27_CURCUMIN_pTy_R1.raw
2	TAGTSFMMtPyVVTR	T9; Y11;	Replicate 1	Unambiguous	MAPK10	NP_620447.1	5602	mitogen-activated protein kinase 10 isoform 4	9	1	20986508	Y11(Phospho)	1	T(1): 0.0; T(4): 0.0; S(5): 0.0; T(9): 100.0; Y(11): 100.0; T(14): 0.0	1				48790000		No Quan Values	Not					42	0.00164722	0	17	2	871.389	1741.77	0.62	86.69	21774	21774	CAL27_CURCUMIN_pTy_R1.raw
2	TAGTSFMMtPyVVTR	T9; Y11;	Replicate 1	Unambiguous	MAPK10	NP_620447.1	5602	mitogen-activated protein kinase 10 isoform 4	9	1	20986508	T14(Phospho)	1	T(1): 0.0; T(4): 0.0; S(5): 0.0; T(9): 100.0; Y(11): 100.0; T(14): 0.0	1				48790000		No Quan Values	Not					22	0.163826	0	51	2	871.389	1741.77	1.11	86.16	21630	21630	CAL27_CURCUMIN_pTy_R1.raw
1	VTPPEGyEVVTVFPK	Y7;	Replicate 1	Unambiguous	PDLIM1	NP_066272.1	9124	PDZ and LIM domain protein 1	1	1	13994151	Y7(Phospho)	1	T(2): 0.0; Y(7): 100.0; T(11): 0.0	1	8801			72060000	Light	Redundant	Not	3.446	71620000	16490000		23	0.113054	0	7	2	871.426	1741.84	-0.21	85.61	21483	21483	CAL27_CURCUMIN_pTy_R1.raw
1	NINSINFDNPVyQK	Y12;	Replicate 1	Unambiguous	LDLR	NP_001182728.1	3949	low-density lipoprotein receptor isoform 3 precursor	5	1	307775414	Y12(Phospho)	1	S(4): 0.0; Y(12): 100.0	1	6848			3716000	Light	Redundant	Not	3.219	3017000	743700		55	8.82646e-05	0	0	2	873.4	1745.79	1.53	72.41	17966	17966	CAL27_CURCUMIN_pTy_R1.raw
2	TAGTSFMMtPyVVTR	T9; Y11;	Replicate 1	Unambiguous	MAPK10	NP_620447.1	5602	mitogen-activated protein kinase 10 isoform 4	9	1	20986508	T14(Phospho); R15(Label:13C(6))	1	T(1): 0.0; T(4): 0.0; S(5): 0.0; T(9): 100.0; Y(11): 100.0; T(14): 0.0	1				6236000		No Quan Values	Not					32	0.0159317	0	4	2	874.399	1747.79	0.7	86.82	21808	21808	CAL27_CURCUMIN_pTy_R1.raw
2	TAGTSFMMtPyVVTR	T9; Y11;	Replicate 1	Unambiguous	MAPK10	NP_620447.1	5602	mitogen-activated protein kinase 10 isoform 4	9	1	20986508	T14(Phospho); R15(Label:13C(6))	1	T(1): 0.0; T(4): 0.0; S(5): 0.0; T(9): 100.0; Y(11): 100.0; T(14): 0.0	1						No Quan Values	Not					26	0.068273	0	21	2	874.4	1747.79	2.51	86.22	21648	21648	CAL27_CURCUMIN_pTy_R1.raw
1	NINSINFDNPVyQK	Y12;	Replicate 1	Unambiguous	LDLR	NP_001182728.1	3949	low-density lipoprotein receptor isoform 3 precursor	5	1	307775414	Y12(Phospho); K14(Label:13C(6))	1	S(4): 0.0; Y(12): 100.0	1	6894			2542000	Heavy	Redundant	Not	3.088	9892000	2542000		77	6.62892e-07	0	10	2	876.408	1751.81	-0.42	72.74	18054	18054	CAL27_CURCUMIN_pTy_R1.raw
1	HKAPGSADyGFAPAAGR	Y9;	Replicate 1	Unambiguous	C6orf132	NP_001157918.1	647024	uncharacterized protein C6orf132	1	1	256574805	Y9(Phospho)	1	S(6): 0.0; Y(9): 100.0	1	1669	1		7087000	Light	Excluded by Method	Not	100	3175000	5315		43	0.00124389	1	39	3	584.933	1752.78	-0.39	40.29	9364	9364	CAL27_CURCUMIN_pTy_R1.raw
1	LSHSSGyAQLNTYSR	Y7;	Replicate 1	Unambiguous	KIRREL	NP_001273278.1	55243	kin of IRRE-like protein 1 isoform 2 precursor	2	1	556503362	Y7(Phospho); R15(Label:13C(6))	1	S(2): 0.0; S(4): 0.0; S(5): 0.5; Y(7): 99.5; T(12): 0.0; Y(13): 0.0; S(14): 0.0	1	2042			1736000	Heavy	Redundant	Not	2.591	5667000	1736000		63	1.61662e-05	0	0	2	885.402	1769.8	0.6	42.86	10054	10054	CAL27_CURCUMIN_pTy_R1.raw
1	DMYDKEyYSVHNK	Y7;	Replicate 1	Unambiguous	MET	NP_000236.2	4233	hepatocyte growth factor receptor isoform b precursor	2	1	42741655	Y8(Phospho)	1	Y(3): 0.0; Y(7): 99.5; Y(8): 0.5; S(9): 0.0	1	1639			181900000	Light	Redundant	Not	1.006	181900000	143400000		42	0.00136233	1	16	3	591.239	1771.7	-0.18	40.65	9460	9460	CAL27_CURCUMIN_pTy_R1.raw
1	DMYDKEyYSVHNK	Y7;	Replicate 1	Unambiguous	MET	NP_000236.2	4233	hepatocyte growth factor receptor isoform b precursor	2	1	42741655	S9(Phospho)	1	Y(3): 0.0; Y(7): 99.5; Y(8): 0.5; S(9): 0.0	1	1639			181900000	Light	Redundant	Not	1.006	181900000	143400000		36	0.00527573	1	17	3	591.239	1771.7	-0.18	40.09	9308	9308	CAL27_CURCUMIN_pTy_R1.raw
1	DMYDKEyYSVHNK	Y7;	Replicate 1	Unambiguous	MET	NP_000236.2	4233	hepatocyte growth factor receptor isoform b precursor	2	1	42741655	Y7(Phospho)	1	Y(3): 0.0; Y(7): 99.5; Y(8): 0.5; S(9): 0.0	1	1640			14770000	Light	Redundant	Not	0.993	14770000	11800000		57	4.96008e-05	1	4	2	886.356	1771.71	1.06	40.16	9327	9327	CAL27_CURCUMIN_pTy_R1.raw
1	DMYDKEyYSVHNK	Y7;	Replicate 1	Unambiguous	MET	NP_000236.2	4233	hepatocyte growth factor receptor isoform b precursor	2	1	42741655	K5(Label:13C(6)); Y7(Phospho); K13(Label:13C(6))	1	Y(3): 0.0; Y(7): 99.5; Y(8): 0.5; S(9): 0.0	1	1639			143400000	Heavy	Redundant	Not	1.006	181900000	143400000		31	0.0181226	1	27	3	595.253	1783.74	-0.27	40.09	9309	9309	CAL27_CURCUMIN_pTy_R1.raw
1	DMYDKEyYSVHNK	Y7;	Replicate 1	Unambiguous	MET	NP_000236.2	4233	hepatocyte growth factor receptor isoform b precursor	2	1	42741655	K5(Label:13C(6)); Y7(Phospho); K13(Label:13C(6))	1	Y(3): 0.0; Y(7): 99.5; Y(8): 0.5; S(9): 0.0	1	1640			11800000	Heavy	Unique	Used	0.993	14770000	11800000		36	0.00561196	1	0	2	892.377	1783.75	1.89	40.11	9313	9313	CAL27_CURCUMIN_pTy_R1.raw
2	SSGPyGGGGQyFAKPR	Y5; Y11;	Replicate 1	Unambiguous	HNRNPA1	NP_002127.1	3178	heterogeneous nuclear ribonucleoprotein A1 isoform a	2	1	4504445	Y5(Phospho); Y11(Phospho)	1	S(1): 0.0; S(2): 0.0; Y(5): 100.0; Y(11): 100.0	1	1414	1		5070000	Light	Excluded by Method	Not	100	2473000	5315		26	0.0594917	0	65	2	894.86	1788.71	-1.45	38.45	8866	8866	CAL27_CURCUMIN_pTy_R1.raw
1	TPLYLQPDAyGSLDR	Y10;	Replicate 1	Unambiguous	PPP1R13L	NP_001135974.1	10848	relA-associated inhibitor	1	1	215820635	S12(Phospho)	1	T(1): 0.0; Y(4): 0.0; Y(10): 99.4; S(12): 0.6	1	7370	1		3277000	Light	Excluded by Method	Not	100	1256000	5315		37	0.00526752	0	32	2	894.916	1788.82	1.85	75.58	18816	18816	CAL27_CURCUMIN_pTy_R1.raw
1	VyGTIKPAFNQNSAAK	Y2;	Replicate 1	Unambiguous	SHANK2	NP_573573.2	22941	SH3 and multiple ankyrin repeat domains protein 2 isoform 2	2	1	254911082	Y2(Phospho)	1	Y(2): 100.0; T(4): 0.0; S(13): 0.0	1	2762			4903000	Light	Redundant	Not	2.47	4903000	1575000		30	0.02955	0	39	3	596.96	1788.87	-0.83	47.39	11274	11274	CAL27_CURCUMIN_pTy_R1.raw
1	VIGAGEFGEVyKGMLK	Y11;	Replicate 1	Unambiguous	EPHA2	NP_004422.2	1969	ephrin type-A receptor 2 precursor	1	1	32967311	Y11(Phospho); K12(Label:13C(6)); K16(Label:13C(6))	1	Y(11): 100.0	1	9007		1	4867000	Heavy	Excluded by Method	Not	0.19203	645300	2667000		54	8.38008e-05	1	28	2	895.454	1789.9	0.16	86.41	21699	21699	CAL27_CURCUMIN_pTy_R1.raw
1	NPGFyVEANPMPTFK	Y5;	Replicate 1	Unambiguous	PLCG1	NP_877963.1	5335	1-phosphatidylinositol 4,5-bisphosphate phosphodiesterase gamma-1 isoform b	2	1	33598946	Y5(Phospho)	1	Y(5): 100.0; T(13): 0.0	1	9888		1	31440000	Light	Excluded by Method	Not	2.86962	12420000	3435000		60	2.59656e-05	0	14	2	896.395	1791.78	1.04	92.79	23411	23411	CAL27_CURCUMIN_pTy_R1.raw
1	NPGFyVEANPMPTFK	Y5;	Replicate 1	Unambiguous	PLCG1	NP_877963.1	5335	1-phosphatidylinositol 4,5-bisphosphate phosphodiesterase gamma-1 isoform b	2	1	33598946	Y5(Phospho)	1	Y(5): 100.0; T(13): 0.0	1	9888		1	31440000	Light	Excluded by Method	Not	2.86962	12420000	3435000		34	0.0113601	0	30	2	896.397	1791.79	3.09	92.09	23223	23223	CAL27_CURCUMIN_pTy_R1.raw
1	SAVGFNEMEAPTTAyK	Y15;	Replicate 1	Unambiguous	HCLS1	NP_005326.2	3059	hematopoietic lineage cell-specific protein isoform 1	1	1	167234422	Y15(Phospho)	1	S(1): 0.0; T(12): 0.7; T(13): 0.7; Y(15): 98.6	1	5593	1		1351000	Light	Excluded by Method	Not	100	673600	5315		23	0.119064	0	0	2	898.386	1795.76	1.69	64.65	15890	15890	CAL27_CURCUMIN_pTy_R1.raw
1	yEAPQATDGLAGALDAR	Y1;	Replicate 1	Unambiguous	TOM1	NP_001129202.1	10043	target of Myb protein 1 isoform 4	4	1	209180450	Y1(Phospho)	1	Y(1): 100.0; T(7): 0.0	1	6748		1	4636000	Light	Excluded by Method	Not	6.72293	2299000	271400		33	0.0139242	0	31	2	899.907	1798.81	3.6	71.72	17783	17783	CAL27_CURCUMIN_pTy_R1.raw
1	DMYDKEyYSVHNK	Y7;	Replicate 1	Unambiguous	MET	NP_000236.2	4233	hepatocyte growth factor receptor isoform b precursor	2	1	42741655	M2(Oxidation); K5(Label:13C(6)); Y7(Phospho); K13(Label:13C(6))	1	Y(3): 0.0; Y(7): 99.5; Y(8): 0.5; S(9): 0.0	1	1673			7262000	Heavy	Redundant	Not	1.052	9626000	7262000		29	0.0260276	1	24	3	600.584	1799.74	-0.63	40.32	9372	9372	CAL27_CURCUMIN_pTy_R1.raw
1	FQDVGPQAPVGSVyQK	Y14;	Replicate 1	Unambiguous	DBNL	NP_001014436.1	28988	drebrin-like protein isoform b	5	1	62198235	Y14(Phospho)	1	S(12): 0.5; Y(14): 99.5	1	4166	1		14970000	Light	Excluded by Method	Not	100	5593000	5315		30	0.0244214	0	52	3	600.617	1799.84	-0.51	56.19	13632	13632	CAL27_CURCUMIN_pTy_R1.raw
1	FQDVGPQAPVGSVyQK	Y14;	Replicate 1	Unambiguous	DBNL	NP_001014436.1	28988	drebrin-like protein isoform b	5	1	62198235	Y14(Phospho)	1	S(12): 0.5; Y(14): 99.5	1	4124			78390000	Light	Redundant	Not	7.914	72310000	7251000		68	4.06073e-06	0	22	2	900.422	1799.84	0.07	55.96	13572	13572	CAL27_CURCUMIN_pTy_R1.raw
1	NGDVSQFPyVEFTGR	Y9;	Replicate 1	Unambiguous	TMEM106B	NP_001127704.1	54664	transmembrane protein 106B	1	1	197116389	T13(Phospho); R15(Label:13C(6))	1	S(5): 0.0; Y(9): 99.5; T(13): 0.5	1	8770			3169000	Heavy	Unique	Used	1.755	7008000	3169000		34	0.0132613	0	0	2	901.399	1801.79	1.27	84.8	21265	21265	CAL27_CURCUMIN_pTy_R1.raw
1	HGHyFVALFDYQAR	Y4;	Replicate 1	Unambiguous	FRK	NP_002022.1	2444	tyrosine-protein kinase FRK	1	1	4503787	Y4(Phospho)	1	Y(4): 100.0; Y(11): 0.0	1	10301		1	1239000	Light	Excluded by Method	Not	0.240954	1239000	4081000		29	0.030098	0	0	2	902.404	1803.8	0.69	94.72	23928	23928	CAL27_CURCUMIN_pTy_R1.raw
1	HGHyFVALFDYQAR	Y4;	Replicate 1	Unambiguous	FRK	NP_002022.1	2444	tyrosine-protein kinase FRK	1	1	4503787	Y4(Phospho)	1	Y(4): 100.0; Y(11): 0.0	1	10264			142800000	Light	Redundant	Not	0.501	142800000	226100000		38	0.0045287	0	23	3	601.939	1803.8	1.42	94.73	23932	23932	CAL27_CURCUMIN_pTy_R1.raw
1	FQDVGPQAPVGSVyQK	Y14;	Replicate 1	Unambiguous	DBNL	NP_001014436.1	28988	drebrin-like protein isoform b	5	1	62198235	Y14(Phospho); K16(Label:13C(6))	1	S(12): 0.5; Y(14): 99.5	1	4124			7251000	Heavy	Redundant	Not	7.914	72310000	7251000		31	0.0246126	0	0	2	903.432	1805.86	-0.05	56.16	13624	13624	CAL27_CURCUMIN_pTy_R1.raw
2	yVDSEGHLyTVPIR	Y1; Y9;	Replicate 1	Unambiguous	CAV1	NP_001744.2	857	caveolin-1 isoform alpha	1	1	15451856	Y1(Phospho); Y9(Phospho)	1	Y(1): 100.0; S(4): 0.0; Y(9): 98.9; T(10): 1.1	1	4917			84540000	Light	Redundant	Not	4.401	84540000	15240000		54	0.000113524	0	13	2	904.886	1808.76	-0.6	60.65	14820	14820	CAL27_CURCUMIN_pTy_R1.raw
2	yVDSEGHLyTVPIR	Y1; Y9;	Replicate 1	Unambiguous	CAV1	NP_001744.2	857	caveolin-1 isoform alpha	1	1	15451856	Y1(Phospho); T10(Phospho)	1	Y(1): 100.0; S(4): 0.0; Y(9): 98.9; T(10): 1.1	1	4989			82350000	Light	Redundant	Not	4.33	76140000	13950000		36	0.00603309	0	25	3	603.593	1808.77	-0.13	61.04	14923	14923	CAL27_CURCUMIN_pTy_R1.raw
2	yVDSEGHLyTVPIR	Y1; Y9;	Replicate 1	Unambiguous	CAV1	NP_001744.2	857	caveolin-1 isoform alpha	1	1	15451856	Y1(Phospho); Y9(Phospho)	1	Y(1): 100.0; S(4): 0.0; Y(9): 98.9; T(10): 1.1	1	4917			84540000	Light	Redundant	Not	4.401	84540000	15240000		66	6.93981e-06	0	0	2	904.888	1808.77	2.17	61.28	14987	14987	CAL27_CURCUMIN_pTy_R1.raw
1	TGVAGEDMQDNSGTyGK	Y15;	Replicate 1	Unambiguous	PRKCD	NP_997704.1	5580	protein kinase C delta type	1	1	47157325	Y15(Phospho)	1	T(1): 0.0; S(12): 0.0; T(14): 0.4; Y(15): 99.6	1	410			6335000	Light	Unique	Used	4.071	6335000	1235000		76	5.18748e-07	0	0	2	905.355	1809.7	1.27	30.47	6735	6735	CAL27_CURCUMIN_pTy_R1.raw
1	HGHyFVALFDYQAR	Y4;	Replicate 1	Unambiguous	FRK	NP_002022.1	2444	tyrosine-protein kinase FRK	1	1	4503787	Y4(Phospho); R14(Label:13C(6))	1	Y(4): 100.0; Y(11): 0.0	1	10301		1	5900000	Heavy	Excluded by Method	Not	0.240954	1239000	4081000		33	0.014406	0	40	2	905.414	1809.82	-0.39	94.57	23890	23890	CAL27_CURCUMIN_pTy_R1.raw
1	HGHyFVALFDYQAR	Y4;	Replicate 1	Unambiguous	FRK	NP_002022.1	2444	tyrosine-protein kinase FRK	1	1	4503787	Y4(Phospho); R14(Label:13C(6))	1	Y(4): 100.0; Y(11): 0.0	1	10264			230000000	Heavy	Redundant	Not	0.501	142800000	226100000		49	0.00034369	0	9	3	603.945	1809.82	-0.09	94.34	23826	23826	CAL27_CURCUMIN_pTy_R1.raw
1	IQNTGDyYDLYGGEK	Y7;	Replicate 1	Unambiguous	PTPN11	NP_002825.3	5781	tyrosine-protein phosphatase non-receptor type 11 isoform 1	2	1	33356177	Y7(Phospho)	1	T(4): 0.5; Y(7): 99.0; Y(8): 0.5; Y(11): 0.0	1	4751			64620000	Light	Redundant	Not	0.951	64620000	53930000		85	6.99869e-08	0	0	2	908.378	1815.75	0.48	59.72	14573	14573	CAL27_CURCUMIN_pTy_R1.raw
1	IQNTGDyYDLYGGEK	Y7;	Replicate 1	Unambiguous	PTPN11	NP_002825.3	5781	tyrosine-protein phosphatase non-receptor type 11 isoform 1	2	1	33356177	Y7(Phospho)	1	T(4): 0.5; Y(7): 99.0; Y(8): 0.5; Y(11): 0.0	1	4751			64620000	Light	Redundant	Not	0.951	64620000	53930000		26	0.0615639	0	0	2	908.378	1815.75	0.75	60.29	14726	14726	CAL27_CURCUMIN_pTy_R1.raw
1	NPGNQAAyEHFETMK	Y8;	Replicate 1	Unambiguous	VCL	NP_003364.1	7414	vinculin isoform VCL	2	1	4507877	Y8(Phospho)	1	Y(8): 100.0; T(13): 0.0	1	3278			13050000	Light	Redundant	Not	1.645	13050000	6294000		39	0.00352889	0	48	3	606.251	1816.74	0.75	50.71	12167	12167	CAL27_CURCUMIN_pTy_R1.raw
1	NPGNQAAyEHFETMK	Y8;	Replicate 1	Unambiguous	VCL	NP_003364.1	7414	vinculin isoform VCL	2	1	4507877	Y8(Phospho)	1	Y(8): 100.0; T(13): 0.0	1	3286			5425000	Light	Redundant	Not	1.552	5425000	2773000		46	0.00079889	0	46	2	908.873	1816.74	1.1	50.77	12182	12182	CAL27_CURCUMIN_pTy_R1.raw
2	TAGTSFMMtPyVVTR	T9; Y11;	Replicate 1	Unambiguous	MAPK10	NP_620447.1	5602	mitogen-activated protein kinase 10 isoform 4	9	1	20986508	T9(Phospho); Y11(Phospho)	1	T(1): 0.0; T(4): 0.0; S(5): 0.0; T(9): 100.0; Y(11): 100.0; T(14): 0.0	1	8542			5141000	Light	Unique	Used	1.48	4672000	2505000		25	0.0752418	0	0	2	911.372	1821.74	0.38	83.36	20885	20885	CAL27_CURCUMIN_pTy_R1.raw
1	IQNTGDyYDLYGGEK	Y7;	Replicate 1	Unambiguous	PTPN11	NP_002825.3	5781	tyrosine-protein phosphatase non-receptor type 11 isoform 1	2	1	33356177	Y7(Phospho); K15(Label:13C(6))	1	T(4): 0.5; Y(7): 99.0; Y(8): 0.5; Y(11): 0.0	1	4751			53930000	Heavy	Redundant	Not	0.951	64620000	53930000		85	8.74625e-08	0	0	2	911.387	1821.77	-0.72	60.2	14701	14701	CAL27_CURCUMIN_pTy_R1.raw
1	IQNTGDyYDLYGGEK	Y7;	Replicate 1	Unambiguous	PTPN11	NP_002825.3	5781	tyrosine-protein phosphatase non-receptor type 11 isoform 1	2	1	33356177	Y7(Phospho); K15(Label:13C(6))	1	T(4): 0.5; Y(7): 99.0; Y(8): 0.5; Y(11): 0.0	1	4751			53930000	Heavy	Redundant	Not	0.951	64620000	53930000		100	2.89999e-09	0	21	2	911.388	1821.77	0.49	59.65	14553	14553	CAL27_CURCUMIN_pTy_R1.raw
1	VFDKDGNGyISAAELR	Y9;	Replicate 1	Unambiguous	CALM3	NP_005175.2	808	calmodulin	1	1	58218968	Y9(Phospho)	1	Y(9): 99.2; S(11): 0.8	1	5268			20350000	Light	Redundant	Not	0.877	20350000	18410000		47	0.000511972	1	48	3	612.284	1834.84	0.43	62.79	15392	15392	CAL27_CURCUMIN_pTy_R1.raw
1	VFDKDGNGyISAAELR	Y9;	Replicate 1	Unambiguous	CALM3	NP_005175.2	808	calmodulin	1	1	58218968	Y9(Phospho)	1	Y(9): 99.2; S(11): 0.8	1	5276			9579000	Light	Unique	Used	1.011	9579000	7520000		24	0.108927	1	0	2	917.923	1834.84	1	62.81	15395	15395	CAL27_CURCUMIN_pTy_R1.raw
1	EDsAYGSQSVEQEAEK	S3;	Replicate 1	Unambiguous	NFKB2	NP_001248332.1	4791	nuclear factor NF-kappa-B p100 subunit isoform b	2	1	387157878	S3(Phospho)	1	S(3): 99.2; Y(5): 0.7; S(7): 0.0; S(9): 0.0	1	945	1		4404000	Light	Excluded by Method	Not	100	2062000	5315		32	0.0119387	0	0	2	918.863	1836.72	1.14	34.92	7912	7912	CAL27_CURCUMIN_pTy_R1.raw
1	YQyGGLNSGRPVTPPR	Y3;	Replicate 1	Unambiguous	PPP1CB	NP_002700.1	5500	serine/threonine-protein phosphatase PP1-beta catalytic subunit isoform 1	1	1	4506005	Y3(Phospho)	1	Y(1): 1.0; Y(3): 99.0; S(8): 0.0; T(13): 0.0	1	2760			24640000	Light	Redundant	Not	13.876	18820000	1077000		23	0.149917	0	47	3	614.628	1841.87	-0.03	47.37	11269	11269	CAL27_CURCUMIN_pTy_R1.raw
1	VFDKDGNGyISAAELR	Y9;	Replicate 1	Unambiguous	CALM3	NP_005175.2	808	calmodulin	1	1	58218968	K4(Label:13C(6)); Y9(Phospho); R16(Label:13C(6))	1	Y(9): 99.2; S(11): 0.8	1	5268			18410000	Heavy	Redundant	Not	0.877	20350000	18410000		38	0.00392591	1	31	3	616.297	1846.88	-1.25	62.77	15385	15385	CAL27_CURCUMIN_pTy_R1.raw
1	VFDKDGNGyISAAELR	Y9;	Replicate 1	Unambiguous	CALM3	NP_005175.2	808	calmodulin	1	1	58218968	K4(Label:13C(6)); Y9(Phospho); R16(Label:13C(6))	1	Y(9): 99.2; S(11): 0.8	1	5276			7520000	Heavy	Redundant	Not	1.011	9579000	7520000		81	1.852e-07	1	0	2	923.943	1846.88	0.41	62.82	15398	15398	CAL27_CURCUMIN_pTy_R1.raw
1	GQESEyGNITYPPAMK	Y6;	Replicate 1	Unambiguous	PTPN6	NP_002822.2	5777	tyrosine-protein phosphatase non-receptor type 6 isoform 1	3	1	18104989	Y6(Phospho)	1	S(4): 0.5; Y(6): 99.5; T(10): 0.0; Y(11): 0.0	1	4914			23100000	Light	Redundant	Not	5.151	20060000	3090000		38	0.00430136	0	21	2	932.896	1864.78	1.06	60.64	14817	14817	CAL27_CURCUMIN_pTy_R1.raw
1	GQESEyGNITYPPAMK	Y6;	Replicate 1	Unambiguous	PTPN6	NP_002822.2	5777	tyrosine-protein phosphatase non-receptor type 6 isoform 1	3	1	18104989	Y6(Phospho)	1	S(4): 0.5; Y(6): 99.5; T(10): 0.0; Y(11): 0.0	1				1673000		No Quan Values	Not					66	5.75026e-06	0	0	2	932.898	1864.79	2.89	61.32	14998	14998	CAL27_CURCUMIN_pTy_R1.raw
1	VDQSAVGFEyQGKTEK	Y10;	Replicate 1	Unambiguous	CTTN	NP_612632.1	2017	src substrate cortactin isoform b	3	1	20357556	Y10(Phospho)	1	S(4): 0.0; Y(10): 99.4; T(14): 0.6	1	1884	1		4862000	Light	Excluded by Method	Not	100	2193000	5315		33	0.0145863	1	0	2	933.42	1865.83	0.88	41.81	9770	9770	CAL27_CURCUMIN_pTy_R1.raw
1	HELQANCyEEVKDR	Y8;	Replicate 1	Unambiguous	CFL1	NP_005498.1	1072	cofilin-1	1	1	5031635	C7(Carbamidomethyl); Y8(Phospho)	1	Y(8): 100.0	1	821			44010000	Light	Redundant	Not	1.13	43910000	30840000		41	0.00202074	1	48	3	624.263	1870.78	-1.85	34.01	7668	7668	CAL27_CURCUMIN_pTy_R1.raw
1	HELQANCyEEVKDR	Y8;	Replicate 1	Unambiguous	CFL1	NP_005498.1	1072	cofilin-1	1	1	5031635	C7(Carbamidomethyl); Y8(Phospho)	1	Y(8): 100.0	1	821			44010000	Light	Redundant	Not	1.13	43910000	30840000		65	8.11751e-06	1	2	3	624.265	1870.78	0.3	34.55	7814	7814	CAL27_CURCUMIN_pTy_R1.raw
2	TACTNFMMtPyVVTR	T9; Y11;	Replicate 1	Unambiguous	MAPK9	NP_001128516.1	5601	mitogen-activated protein kinase 9 isoform JNK2 gamma	5	1	205277412	C3(Carbamidomethyl); Y11(Phospho)	1	T(1): 0.0; T(4): 0.0; T(9): 100.0; Y(11): 99.3; T(14): 0.7	1	8977			24040000	Light	Redundant	Not	1.537	24040000	12410000		57	6.78502e-05	0	35	2	936.399	1871.79	0.48	86.8	21804	21804	CAL27_CURCUMIN_pTy_R1.raw
2	TACTNFMMtPyVVTR	T9; Y11;	Replicate 1	Unambiguous	MAPK9	NP_001128516.1	5601	mitogen-activated protein kinase 9 isoform JNK2 gamma	5	1	205277412	C3(Carbamidomethyl); Y11(Phospho)	1	T(1): 0.0; T(4): 0.0; T(9): 100.0; Y(11): 99.3; T(14): 0.7	1	8977			24040000	Light	Redundant	Not	1.537	24040000	12410000		52	0.00020209	0	0	2	936.4	1871.79	1.52	86.23	21649	21649	CAL27_CURCUMIN_pTy_R1.raw
2	TACTNFMMtPyVVTR	T9; Y11;	Replicate 1	Unambiguous	MAPK9	NP_001128516.1	5601	mitogen-activated protein kinase 9 isoform JNK2 gamma	5	1	205277412	C3(Carbamidomethyl); T14(Phospho); R15(Label:13C(6))	1	T(1): 0.0; T(4): 0.0; T(9): 100.0; Y(11): 99.3; T(14): 0.7	1	8977			12410000	Heavy	Unique	Used	1.537	24040000	12410000		39	0.00390686	0	0	2	939.409	1877.81	0.88	86.25	21655	21655	CAL27_CURCUMIN_pTy_R1.raw
2	TACTNFMMtPyVVTR	T9; Y11;	Replicate 1	Unambiguous	MAPK9	NP_001128516.1	5601	mitogen-activated protein kinase 9 isoform JNK2 gamma	5	1	205277412	C3(Carbamidomethyl); T14(Phospho); R15(Label:13C(6))	1	T(1): 0.0; T(4): 0.0; T(9): 100.0; Y(11): 99.3; T(14): 0.7	1	8977			12410000	Heavy	Redundant	Not	1.537	24040000	12410000		35	0.0103235	0	14	2	939.409	1877.81	0.88	86.81	21807	21807	CAL27_CURCUMIN_pTy_R1.raw
2	SDsASSEPVGIyQGFEK	S3; Y12;	Replicate 1	Unambiguous	PRKCD	NP_997704.1	5580	protein kinase C delta type	1	1	47157325	Y12(Phospho)	1	S(1): 0.9; S(3): 99.1; S(5): 0.0; S(6): 0.0; Y(12): 100.0	1	5037			27110000	Light	Redundant	Not	2.073	24920000	9536000		52	0.000197974	0	3	2	940.902	1880.8	1.32	61.38	15014	15014	CAL27_CURCUMIN_pTy_R1.raw
1	HELQANCyEEVKDR	Y8;	Replicate 1	Unambiguous	CFL1	NP_005498.1	1072	cofilin-1	1	1	5031635	C7(Carbamidomethyl); Y8(Phospho); K12(Label:13C(6)); R14(Label:13C(6))	1	Y(8): 100.0	1	821			30840000	Heavy	Redundant	Not	1.13	43910000	30840000		65	9.68319e-06	1	3	3	628.278	1882.82	-0.37	34.1	7691	7691	CAL27_CURCUMIN_pTy_R1.raw
1	HELQANCyEEVKDR	Y8;	Replicate 1	Unambiguous	CFL1	NP_005498.1	1072	cofilin-1	1	1	5031635	C7(Carbamidomethyl); Y8(Phospho); K12(Label:13C(6)); R14(Label:13C(6))	1	Y(8): 100.0	1	821			30840000	Heavy	Redundant	Not	1.13	43910000	30840000		68	4.76301e-06	1	12	3	628.279	1882.82	0.99	34.63	7836	7836	CAL27_CURCUMIN_pTy_R1.raw
1	AAVPSGASTGIyEALELR	Y12;	Replicate 1	Unambiguous	ENO1	NP_001419.1	2023	alpha-enolase isoform 1	4	1	4503571	Y12(Phospho)	1	S(5): 0.0; S(8): 0.0; T(9): 0.0; Y(12): 100.0	1	10868			37760000	Light	Unique	Used	1.437	36040000	19910000		32	0.0207855	0	0	2	942.959	1884.91	0.56	98.07	24829	24829	CAL27_CURCUMIN_pTy_R1.raw
1	AAVPSGASTGIyEALELR	Y12;	Replicate 1	Unambiguous	ENO1	NP_001419.1	2023	alpha-enolase isoform 1	4	1	4503571	Y12(Phospho)	1	S(5): 0.0; S(8): 0.0; T(9): 0.0; Y(12): 100.0	1	10754			23380000	Light	Redundant	Not	1.261	21520000	13540000		95	9.70837e-09	0	6	2	942.962	1884.92	3.15	97.37	24641	24641	CAL27_CURCUMIN_pTy_R1.raw
2	SDsASSEPVGIyQGFEK	S3; Y12;	Replicate 1	Unambiguous	PRKCD	NP_997704.1	5580	protein kinase C delta type	1	1	47157325	Y12(Phospho); K17(Label:13C(6))	1	S(1): 0.9; S(3): 99.1; S(5): 0.0; S(6): 0.0; Y(12): 100.0	1	5037			9536000	Heavy	Redundant	Not	2.073	24920000	9536000		51	0.000239715	0	0	2	943.913	1886.82	1.9	61.32	15000	15000	CAL27_CURCUMIN_pTy_R1.raw
1	GDKQVEyLDLDLDSGK	Y7;	Replicate 1	Unambiguous	GAB1	NP_002030.2	2549	GRB2-associated-binding protein 1 isoform b	2	1	46370073	K3(Label:13C(6)); Y7(Phospho); K16(Label:13C(6))	1	Y(7): 100.0; S(14): 0.0	1	7099			3204000	Heavy	Redundant	Not	0.935	3775000	3204000		46	0.000679061	1	19	2	943.946	1886.88	1.22	73.91	18370	18370	CAL27_CURCUMIN_pTy_R1.raw
1	AAVPSGASTGIyEALELR	Y12;	Replicate 1	Unambiguous	ENO1	NP_001419.1	2023	alpha-enolase isoform 1	4	1	4503571	Y12(Phospho); R18(Label:13C(6))	1	S(5): 0.0; S(8): 0.0; T(9): 0.0; Y(12): 100.0	1	10868			19910000	Heavy	Redundant	Not	1.437	36040000	19910000		60	2.50347e-05	0	0	2	945.97	1890.93	0.82	98.1	24837	24837	CAL27_CURCUMIN_pTy_R1.raw
1	EVGDyGQLHETEVLLK	Y5;	Replicate 1	Unambiguous	JAK2	NP_004963.1	3717	tyrosine-protein kinase JAK2	1	1	4826776	Y5(Phospho)	1	Y(5): 100.0; T(11): 0.0	1	7440			6038000	Light	Redundant	Not	1.43	5572000	3091000		27	0.0596004	0	33	3	637.302	1909.89	-2.1	76.02	18932	18932	CAL27_CURCUMIN_pTy_R1.raw
1	NEGFyADPYLYHEGR	Y5;	Replicate 1	Unambiguous	KIAA1217	NP_001091970.1	56243	sickle tail protein homolog isoform 2	6	1	148612813	Y5(Phospho)	1	Y(5): 100.0; Y(9): 0.0; Y(11): 0.0	1	6917			2465000	Light	Redundant	Not	1.787	2099000	932000		38	0.00336092	0	0	2	955.893	1910.78	1.74	72.85	18083	18083	CAL27_CURCUMIN_pTy_R1.raw
1	NLTEQNSySNIPHEGK	Y8;	Replicate 1	Unambiguous	FAM120A	NP_001273652.1	23196	constitutive coactivator of PPAR-gamma-like protein 1 isoform c	5	1	557878628	S9(Phospho)	1	T(3): 0.0; S(7): 0.8; Y(8): 98.5; S(9): 0.8	1	1712	1		10590000	Light	Excluded by Method	Not	100	4701000	5315		40	0.00312364	0	62	3	637.613	1910.83	-1.16	40.55	9435	9435	CAL27_CURCUMIN_pTy_R1.raw
1	TLyDFPGNDAEDLPFK	Y3;	Replicate 1	Unambiguous	CRKL	NP_005198.1	1399	crk-like protein	1	1	4885153	Y3(Phospho)	1	T(1): 0.0; Y(3): 100.0	1	10980			24240000	Light	Redundant	Not	1.446	24240000	13300000		60	2.66318e-05	0	17	2	961.415	1921.82	-1.79	98.93	25061	25061	CAL27_CURCUMIN_pTy_R1.raw
1	LSLEGDHSTPPSAyGSVK	Y14;	Replicate 1	Unambiguous	ANXA2	NP_001002857.1	302	annexin A2 isoform 2	2	1	50845386	Y14(Phospho)	1	S(2): 0.0; S(8): 0.0; T(9): 0.0; S(12): 0.0; Y(14): 99.5; S(16): 0.5	1	3570	1		569500	Light	Redundant	Not	40.197	269200	5315		24	0.115772	0	35	3	642.294	1924.87	-0.07	52.6	12672	12672	CAL27_CURCUMIN_pTy_R1.raw
1	LSLEGDHSTPPSAyGSVK	Y14;	Replicate 1	Unambiguous	ANXA2	NP_001002857.1	302	annexin A2 isoform 2	2	1	50845386	Y14(Phospho)	1	S(2): 0.0; S(8): 0.0; T(9): 0.0; S(12): 0.0; Y(14): 99.5; S(16): 0.5	1	3306			2851000000	Light	Redundant	Not	2.257	2851000000	1002000000		63	1.3251e-05	0	18	3	642.295	1924.87	0.31	50.87	12210	12210	CAL27_CURCUMIN_pTy_R1.raw
1	LSLEGDHSTPPSAyGSVK	Y14;	Replicate 1	Unambiguous	ANXA2	NP_001002857.1	302	annexin A2 isoform 2	2	1	50845386	Y14(Phospho)	1	S(2): 0.0; S(8): 0.0; T(9): 0.0; S(12): 0.0; Y(14): 99.5; S(16): 0.5	1						No Quan Values	Not					88	4.39945e-08	0	0	2	962.939	1924.87	0.67	51.39	12349	12349	CAL27_CURCUMIN_pTy_R1.raw
1	LSLEGDHSTPPSAyGSVK	Y14;	Replicate 1	Unambiguous	ANXA2	NP_001002857.1	302	annexin A2 isoform 2	2	1	50845386	Y14(Phospho)	1	S(2): 0.0; S(8): 0.0; T(9): 0.0; S(12): 0.0; Y(14): 99.5; S(16): 0.5	1						No Quan Values	Not					78	4.04174e-07	0	0	2	962.939	1924.87	0.79	50.83	12199	12199	CAL27_CURCUMIN_pTy_R1.raw
1	LSLEGDHSTPPSAyGSVK	Y14;	Replicate 1	Unambiguous	ANXA2	NP_001002857.1	302	annexin A2 isoform 2	2	1	50845386	Y14(Phospho)	1	S(2): 0.0; S(8): 0.0; T(9): 0.0; S(12): 0.0; Y(14): 99.5; S(16): 0.5	1	3556			1037000000	Light	Redundant	Not	2.167	1037000000	379500000		89	3.1787e-08	0	0	2	962.939	1924.87	0.86	52.5	12645	12645	CAL27_CURCUMIN_pTy_R1.raw
1	LSLEGDHSTPPSAyGSVK	Y14;	Replicate 1	Unambiguous	ANXA2	NP_001002857.1	302	annexin A2 isoform 2	2	1	50845386	Y14(Phospho)	1	S(2): 0.0; S(8): 0.0; T(9): 0.0; S(12): 0.0; Y(14): 99.5; S(16): 0.5	1	3306			2851000000	Light	Redundant	Not	2.257	2851000000	1002000000		65	8.25199e-06	0	2	3	642.295	1924.87	1.45	52.03	12521	12521	CAL27_CURCUMIN_pTy_R1.raw
1	LSLEGDHSTPPSAyGSVK	Y14;	Replicate 1	Unambiguous	ANXA2	NP_001002857.1	302	annexin A2 isoform 2	2	1	50845386	Y14(Phospho)	1	S(2): 0.0; S(8): 0.0; T(9): 0.0; S(12): 0.0; Y(14): 99.5; S(16): 0.5	1						No Quan Values	Not					89	3.77372e-08	0	0	2	962.94	1924.87	2	51.92	12492	12492	CAL27_CURCUMIN_pTy_R1.raw
1	TLyDFPGNDAEDLPFK	Y3;	Replicate 1	Unambiguous	CRKL	NP_005198.1	1399	crk-like protein	1	1	4885153	Y3(Phospho); K16(Label:13C(6))	1	T(1): 0.0; Y(3): 100.0	1	10980			13300000	Heavy	Redundant	Not	1.446	24240000	13300000		46	0.000785085	0	38	2	964.424	1927.84	-2.28	98.8	25026	25026	CAL27_CURCUMIN_pTy_R1.raw
1	QyTSPEEIDAQLQAEK	Y2;	Replicate 1	Unambiguous	PDAP1	NP_055706.1	11333	28 kDa heat- and acid-stable phosphoprotein	1	1	7657441	Y2(Phospho)	1	Y(2): 100.0; T(3): 0.0; S(4): 0.0	1	6068	1		11350000	Light	Excluded by Method	Not	100	4781000	5315		95	8.90648e-09	0	0	2	965.428	1929.85	0.13	68.03	16795	16795	CAL27_CURCUMIN_pTy_R1.raw
1	LSLEGDHSTPPSAyGSVK	Y14;	Replicate 1	Unambiguous	ANXA2	NP_001002857.1	302	annexin A2 isoform 2	2	1	50845386	Y14(Phospho); K18(Label:13C(6))	1	S(2): 0.0; S(8): 0.0; T(9): 0.0; S(12): 0.0; Y(14): 99.5; S(16): 0.5	1	3306			1002000000	Heavy	Redundant	Not	2.257	2851000000	1002000000		61	2.34039e-05	0	10	3	644.301	1930.89	-1.01	51.61	12410	12410	CAL27_CURCUMIN_pTy_R1.raw
1	LSLEGDHSTPPSAyGSVK	Y14;	Replicate 1	Unambiguous	ANXA2	NP_001002857.1	302	annexin A2 isoform 2	2	1	50845386	Y14(Phospho); K18(Label:13C(6))	1	S(2): 0.0; S(8): 0.0; T(9): 0.0; S(12): 0.0; Y(14): 99.5; S(16): 0.5	1	3306			1002000000	Heavy	Redundant	Not	2.257	2851000000	1002000000		57	6.92709e-05	0	13	3	644.301	1930.89	-0.06	50.99	12242	12242	CAL27_CURCUMIN_pTy_R1.raw
1	LSLEGDHSTPPSAyGSVK	Y14;	Replicate 1	Unambiguous	ANXA2	NP_001002857.1	302	annexin A2 isoform 2	2	1	50845386	Y14(Phospho); K18(Label:13C(6))	1	S(2): 0.0; S(8): 0.0; T(9): 0.0; S(12): 0.0; Y(14): 99.5; S(16): 0.5	1				352400000		No Quan Values	Not					104	1.39269e-09	0	3	2	965.948	1930.89	0.04	51.53	12386	12386	CAL27_CURCUMIN_pTy_R1.raw
1	LSLEGDHSTPPSAyGSVK	Y14;	Replicate 1	Unambiguous	ANXA2	NP_001002857.1	302	annexin A2 isoform 2	2	1	50845386	Y14(Phospho); K18(Label:13C(6))	1	S(2): 0.0; S(8): 0.0; T(9): 0.0; S(12): 0.0; Y(14): 99.5; S(16): 0.5	1	3306			1002000000	Heavy	Redundant	Not	2.257	2851000000	1002000000		52	0.000203637	0	6	3	644.301	1930.89	0.32	52.26	12582	12582	CAL27_CURCUMIN_pTy_R1.raw
1	LSLEGDHSTPPSAyGSVK	Y14;	Replicate 1	Unambiguous	ANXA2	NP_001002857.1	302	annexin A2 isoform 2	2	1	50845386	Y14(Phospho); K18(Label:13C(6))	1	S(2): 0.0; S(8): 0.0; T(9): 0.0; S(12): 0.0; Y(14): 99.5; S(16): 0.5	1				352400000		No Quan Values	Not					92	1.97644e-08	0	0	2	965.948	1930.89	0.35	52.22	12571	12571	CAL27_CURCUMIN_pTy_R1.raw
1	LSLEGDHSTPPSAyGSVK	Y14;	Replicate 1	Unambiguous	ANXA2	NP_001002857.1	302	annexin A2 isoform 2	2	1	50845386	Y14(Phospho); K18(Label:13C(6))	1	S(2): 0.0; S(8): 0.0; T(9): 0.0; S(12): 0.0; Y(14): 99.5; S(16): 0.5	1				352400000		No Quan Values	Not					84	1.27501e-07	0	0	2	965.949	1930.89	0.67	50.89	12215	12215	CAL27_CURCUMIN_pTy_R1.raw
1	QSLTHGSsGYINSTGSTR	S8;	Replicate 1	Unambiguous	COL17A1	NP_000485.3	1308	collagen alpha-1(XVII) chain	1	1	119829187	Y10(Phospho)	1	S(2): 0.0; T(4): 0.0; S(7): 1.0; S(8): 98.0; Y(10): 1.0; S(13): 0.0; T(14): 0.0; S(16): 0.0; T(17): 0.0	1	704			15260000	Light	Unique	Used	2.093	15040000	5701000		31	0.0189642	0	0	2	966.927	1932.85	0.7	33.55	7544	7544	CAL27_CURCUMIN_pTy_R1.raw
1	AGKGESAGyMEPYEAQR	Y9;	Replicate 1	Unambiguous	SHB	NP_003019.2	6461	SH2 domain-containing adapter protein B	1	1	106879210	K3(Label:13C(6)); Y9(Phospho); R17(Label:13C(6))	1	S(6): 0.0; Y(9): 100.0; Y(13): 0.0	1	1931	1		13040000	Heavy	Excluded by Method	Not	0.01	5315	5349000		31	0.0213497	1	29	3	645.95	1935.83	-0.21	42.11	9851	9851	CAL27_CURCUMIN_pTy_R1.raw
1	AGKGESAGyMEPYEAQR	Y9;	Replicate 1	Unambiguous	SHB	NP_003019.2	6461	SH2 domain-containing adapter protein B	1	1	106879210	K3(Label:13C(6)); Y9(Phospho); R17(Label:13C(6))	1	S(6): 0.0; Y(9): 100.0; Y(13): 0.0	1	1925	1		5801000	Heavy	Excluded by Method	Not	0.01	5315	2685000		74	1.18435e-06	1	0	2	968.423	1935.84	1.97	42.07	9840	9840	CAL27_CURCUMIN_pTy_R1.raw
1	VADLTEQYNEQyGAVR	Y12;	Replicate 1	Unambiguous	RBM14-RBM4	NP_001185774.1	100526737	RBM14-RBM4 protein isoform 1	2	1	311771545	Y12(Phospho)	1	T(5): 0.0; Y(8): 0.0; Y(12): 100.0	1	4035	1		3778000	Light	Excluded by Method	Not	100	1538000	5315		58	5.38084e-05	0	0	2	968.43	1935.85	2	55.45	13434	13434	CAL27_CURCUMIN_pTy_R1.raw
1	GYSDEIyVVPDDSQNR	Y7;	Replicate 1	Unambiguous	ARHGAP5	NP_001164.2	394	rho GTPase-activating protein 5 isoform b	2	1	71834861	Y7(Phospho)	1	Y(2): 0.0; S(3): 0.0; Y(7): 100.0; S(13): 0.0	1	5240	1		1148000	Light	Excluded by Method	Not	100	784400	5315		47	0.000514602	0	0	2	968.904	1936.8	2	62.59	15338	15338	CAL27_CURCUMIN_pTy_R1.raw
1	QSLTHGSsGYINSTGSTR	S8;	Replicate 1	Unambiguous	COL17A1	NP_000485.3	1308	collagen alpha-1(XVII) chain	1	1	119829187	Y10(Phospho); R18(Label:13C(6))	1	S(2): 0.0; T(4): 0.0; S(7): 1.0; S(8): 98.0; Y(10): 1.0; S(13): 0.0; T(14): 0.0; S(16): 0.0; T(17): 0.0	1	719			17450000	Heavy	Redundant	Not	1.959	40200000	16280000		29	0.0340384	0	37	3	646.96	1938.86	0.03	33.19	7445	7445	CAL27_CURCUMIN_pTy_R1.raw
1	yVLCPSTTPSPAQPADR	Y1;	Replicate 1	Unambiguous	AXL	NP_001265528.1	558	tyrosine-protein kinase receptor UFO isoform 3	3	1	520260399	Y1(Phospho); C4(Carbamidomethyl)	1	Y(1): 100.0; S(6): 0.0; T(7): 0.0; T(8): 0.0; S(10): 0.0	1	3394			42480000	Light	Redundant	Not	0.527	41740000	62900000		65	9.3411e-06	0	61	2	970.433	1939.86	-1.66	51.52	12383	12383	CAL27_CURCUMIN_pTy_R1.raw
1	yVLCPSTTPSPAQPADR	Y1;	Replicate 1	Unambiguous	AXL	NP_001265528.1	558	tyrosine-protein kinase receptor UFO isoform 3	3	1	520260399	Y1(Phospho); C4(Carbamidomethyl)	1	Y(1): 100.0; S(6): 0.0; T(7): 0.0; T(8): 0.0; S(10): 0.0	1	3394			42480000	Light	Redundant	Not	0.527	41740000	62900000		73	1.65866e-06	0	4	2	970.436	1939.87	1.55	52.11	12541	12541	CAL27_CURCUMIN_pTy_R1.raw
1	yVLCPSTTPSPAQPADR	Y1;	Replicate 1	Unambiguous	AXL	NP_001265528.1	558	tyrosine-protein kinase receptor UFO isoform 3	3	1	520260399	Y1(Phospho); C4(Carbamidomethyl); R17(Label:13C(6))	1	Y(1): 100.0; S(6): 0.0; T(7): 0.0; T(8): 0.0; S(10): 0.0	1	3394			62900000	Heavy	Redundant	Not	0.527	41740000	62900000		59	3.96474e-05	0	13	2	973.444	1945.88	-0.45	51.58	12400	12400	CAL27_CURCUMIN_pTy_R1.raw
1	yVLCPSTTPSPAQPADR	Y1;	Replicate 1	Unambiguous	AXL	NP_001265528.1	558	tyrosine-protein kinase receptor UFO isoform 3	3	1	520260399	Y1(Phospho); C4(Carbamidomethyl); R17(Label:13C(6))	1	Y(1): 100.0; S(6): 0.0; T(7): 0.0; T(8): 0.0; S(10): 0.0	1	3394			62900000	Heavy	Redundant	Not	0.527	41740000	62900000		58	5.18245e-05	0	9	2	973.446	1945.88	0.8	52.16	12556	12556	CAL27_CURCUMIN_pTy_R1.raw
2	TACTNFMMtPyVVTR	T9; Y11;	Replicate 1	Unambiguous	MAPK9	NP_001128516.1	5601	mitogen-activated protein kinase 9 isoform JNK2 gamma	5	1	205277412	C3(Carbamidomethyl); T9(Phospho); Y11(Phospho)	1	T(1): 0.0; T(4): 0.0; T(9): 100.0; Y(11): 99.3; T(14): 0.7	1	8193			10080000	Light	Redundant	Not	1.46	10080000	5478000		40	0.00208189	0	41	2	976.383	1951.76	1.39	81.36	20361	20361	CAL27_CURCUMIN_pTy_R1.raw
1	NASTFEDVTQVSSAyQK	Y15;	Replicate 1	Unambiguous	CTTN	NP_612632.1	2017	src substrate cortactin isoform b	3	1	20357556	Y15(Phospho)	1	S(3): 0.0; T(4): 0.0; T(9): 0.0; S(12): 0.0; S(13): 1.1; Y(15): 98.9	1	4676		1	12480000	Light	Excluded by Method	Not	6.15794	4501000	580100		38	0.00430545	0	49	3	652.285	1954.84	-0.72	59.23	14439	14439	CAL27_CURCUMIN_pTy_R1.raw
1	NASTFEDVTQVSSAyQK	Y15;	Replicate 1	Unambiguous	CTTN	NP_612632.1	2017	src substrate cortactin isoform b	3	1	20357556	Y15(Phospho)	1	S(3): 0.0; T(4): 0.0; T(9): 0.0; S(12): 0.0; S(13): 1.1; Y(15): 98.9	1	4655			38910000	Light	Redundant	Not	5.164	35840000	5507000		55	0.000100371	0	0	2	977.927	1954.85	1.44	59.71	14568	14568	CAL27_CURCUMIN_pTy_R1.raw
1	NASTFEDVTQVSSAyQK	Y15;	Replicate 1	Unambiguous	CTTN	NP_612632.1	2017	src substrate cortactin isoform b	3	1	20357556	Y15(Phospho)	1	S(3): 0.0; T(4): 0.0; T(9): 0.0; S(12): 0.0; S(13): 1.1; Y(15): 98.9	1	4655			38910000	Light	Redundant	Not	5.164	35840000	5507000		99	3.37121e-09	0	53	2	977.928	1954.85	3.07	59.12	14411	14411	CAL27_CURCUMIN_pTy_R1.raw
2	TACTNFMMtPyVVTR	T9; Y11;	Replicate 1	Unambiguous	MAPK9	NP_001128516.1	5601	mitogen-activated protein kinase 9 isoform JNK2 gamma	5	1	205277412	C3(Carbamidomethyl); T9(Phospho); Y11(Phospho); R15(Label:13C(6))	1	T(1): 0.0; T(4): 0.0; T(9): 100.0; Y(11): 99.3; T(14): 0.7	1	8193			5478000	Heavy	Unique	Used	1.46	10080000	5478000		26	0.0717038	0	0	2	979.391	1957.77	-0.86	81.06	20280	20280	CAL27_CURCUMIN_pTy_R1.raw
2	TACTNFMMtPyVVTR	T9; Y11;	Replicate 1	Unambiguous	MAPK9	NP_001128516.1	5601	mitogen-activated protein kinase 9 isoform JNK2 gamma	5	1	205277412	C3(Carbamidomethyl); T9(Phospho); Y11(Phospho); R15(Label:13C(6))	1	T(1): 0.0; T(4): 0.0; T(9): 100.0; Y(11): 99.3; T(14): 0.7	1	8298			3308000	Heavy	Redundant	Not	1.191	4627000	3082000		66	6.97021e-06	0	0	2	979.392	1957.78	0.7	81.68	20446	20446	CAL27_CURCUMIN_pTy_R1.raw
2	SDsASSEPVGIyQGFEK	S3; Y12;	Replicate 1	Unambiguous	PRKCD	NP_997704.1	5580	protein kinase C delta type	1	1	47157325	S3(Phospho); Y12(Phospho)	1	S(1): 0.9; S(3): 99.1; S(5): 0.0; S(6): 0.0; Y(12): 100.0	1	5384		1	3239000	Light	Excluded by Method	Not	2.56295	3239000	1003000		30	0.0226088	0	0	2	980.884	1960.76	-0.8	63.39	15551	15551	CAL27_CURCUMIN_pTy_R1.raw
1	NASTFEDVTQVSSAyQK	Y15;	Replicate 1	Unambiguous	CTTN	NP_612632.1	2017	src substrate cortactin isoform b	3	1	20357556	Y15(Phospho); K17(Label:13C(6))	1	S(3): 0.0; T(4): 0.0; T(9): 0.0; S(12): 0.0; S(13): 1.1; Y(15): 98.9	1	4655			5507000	Heavy	Redundant	Not	5.164	35840000	5507000		70	2.95151e-06	0	52	2	980.937	1960.87	1.76	59.3	14458	14458	CAL27_CURCUMIN_pTy_R1.raw
1	NGNGGPGPyVGQAGTATLPR	Y9;	Replicate 1	Unambiguous	CTNND1	NP_001193818.1	1500	catenin delta-1 isoform 2A	15	1	332688218	Y9(Phospho)	1	Y(9): 100.0; T(15): 0.0; T(17): 0.0	1	4216	1		3921000	Light	Excluded by Method	Not	100	1597000	5315		55	0.000102332	0	0	2	982.454	1963.9	-0.69	57.11	13880	13880	CAL27_CURCUMIN_pTy_R1.raw
1	NGNGGPGPyVGQAGTATLPR	Y9;	Replicate 1	Unambiguous	CTNND1	NP_001193818.1	1500	catenin delta-1 isoform 2A	15	1	332688218	Y9(Phospho)	1	Y(9): 100.0; T(15): 0.0; T(17): 0.0	1	4216	1		3921000	Light	Excluded by Method	Not	100	1597000	5315		44	0.00120184	0	58	2	982.456	1963.9	0.99	56.47	13709	13709	CAL27_CURCUMIN_pTy_R1.raw
1	NGNGGPGPyVGQAGTATLPR	Y9;	Replicate 1	Unambiguous	CTNND1	NP_001193818.1	1500	catenin delta-1 isoform 2A	15	1	332688218	Y9(Phospho)	1	Y(9): 100.0; T(15): 0.0; T(17): 0.0	1				1030000		No Quan Values	Not					27	0.0616375	0	17	3	655.307	1963.9	1.39	56.63	13751	13751	CAL27_CURCUMIN_pTy_R1.raw
1	HLLAPGPQDIyDVPPVR	Y11;	Replicate 1	Unambiguous	BCAR1	NP_001164190.1	9564	breast cancer anti-estrogen resistance protein 1 isoform 7	9	1	282398123	Y11(Phospho)	1	Y(11): 100.0	1				1410000		No Quan Values	Not					40	0.0026708	0	10	2	983.992	1966.98	-0.64	80.38	20097	20097	CAL27_CURCUMIN_pTy_R1.raw
1	HLLAPGPQDIyDVPPVR	Y11;	Replicate 1	Unambiguous	BCAR1	NP_001164190.1	9564	breast cancer anti-estrogen resistance protein 1 isoform 7	9	1	282398123	Y11(Phospho)	1	Y(11): 100.0	1	8254	1		5115000	Light	Excluded by Method	Not	100	1990000	5315		68	3.72084e-06	0	16	3	656.331	1966.98	-0.43	81.44	20383	20383	CAL27_CURCUMIN_pTy_R1.raw
1	HLLAPGPQDIyDVPPVR	Y11;	Replicate 1	Unambiguous	BCAR1	NP_001164190.1	9564	breast cancer anti-estrogen resistance protein 1 isoform 7	9	1	282398123	Y11(Phospho)	1	Y(11): 100.0	1	8138			13940000	Light	Redundant	Not	1.163	13940000	9513000		63	1.40456e-05	0	29	3	656.331	1966.98	0.32	80.82	20215	20215	CAL27_CURCUMIN_pTy_R1.raw
1	HLLAPGPQDIyDVPPVR	Y11;	Replicate 1	Unambiguous	BCAR1	NP_001164190.1	9564	breast cancer anti-estrogen resistance protein 1 isoform 7	9	1	282398123	Y11(Phospho)	1	Y(11): 100.0	1	8053			12960000	Light	Redundant	Not	0.782	12960000	13150000		28	0.0401872	0	53	3	656.331	1966.98	0.41	80.18	20045	20045	CAL27_CURCUMIN_pTy_R1.raw
1	LVyENINGLSIPSASGVR	Y3;	Replicate 1	Unambiguous	FRS2	NP_001265284.1	10818	fibroblast growth factor receptor substrate 2	1	1	507834071	Y3(Phospho)	1	Y(3): 100.0; S(10): 0.0; S(13): 0.0; S(15): 0.0	1	9034		1	6468000	Light	Excluded by Method	Not	3.69255	2692000	578600		71	1.93158e-06	0	0	2	984.993	1968.98	0.22	86.6	21750	21750	CAL27_CURCUMIN_pTy_R1.raw
1	HLLAPGPQDIyDVPPVR	Y11;	Replicate 1	Unambiguous	BCAR1	NP_001164190.1	9564	breast cancer anti-estrogen resistance protein 1 isoform 7	9	1	282398123	Y11(Phospho); R17(Label:13C(6))	1	Y(11): 100.0	1	8138			10080000	Heavy	Redundant	Not	1.163	13940000	9513000		85	7.26731e-08	0	22	3	658.338	1973	-0.42	80.75	20195	20195	CAL27_CURCUMIN_pTy_R1.raw
1	HLLAPGPQDIyDVPPVR	Y11;	Replicate 1	Unambiguous	BCAR1	NP_001164190.1	9564	breast cancer anti-estrogen resistance protein 1 isoform 7	9	1	282398123	Y11(Phospho); R17(Label:13C(6))	1	Y(11): 100.0	1						No Quan Values	Not					40	0.00238881	0	19	3	658.338	1973	-0.24	81.37	20362	20362	CAL27_CURCUMIN_pTy_R1.raw
1	SVSPTTEMVSNESVDyR	Y16;	Replicate 1	Unambiguous	MET	NP_000236.2	4233	hepatocyte growth factor receptor isoform b precursor	2	1	42741655	Y16(Phospho)	1	S(1): 0.0; S(3): 0.0; T(5): 0.0; T(6): 0.0; S(10): 0.0; S(13): 0.0; Y(16): 100.0	1	4239			7492000	Light	Redundant	Not	1.217	7492000	4884000		49	0.000314088	0	18	2	990.92	1980.83	4.02	56.59	13739	13739	CAL27_CURCUMIN_pTy_R1.raw
1	SVSPTTEMVSNESVDyR	Y16;	Replicate 1	Unambiguous	MET	NP_000236.2	4233	hepatocyte growth factor receptor isoform b precursor	2	1	42741655	Y16(Phospho); R17(Label:13C(6))	1	S(1): 0.0; S(3): 0.0; T(5): 0.0; T(6): 0.0; S(10): 0.0; S(13): 0.0; Y(16): 100.0	1	4239			4884000	Heavy	Redundant	Not	1.217	7492000	4884000		44	0.00107286	0	0	2	993.927	1986.85	0.14	56.74	13780	13780	CAL27_CURCUMIN_pTy_R1.raw
1	VVQEYIDAFSDyANFK	Y12;	Replicate 1	Unambiguous	PTPRA	NP_543030.1	5786	receptor-type tyrosine-protein phosphatase alpha isoform 2 precursor	2	1	18450369	Y12(Phospho)	1	Y(5): 0.0; S(10): 0.0; Y(12): 100.0	1	11529			483100000	Light	Redundant	Not	0.9	483100000	425800000		79	2.66774e-07	0	1	2	994.937	1988.87	-0.17	102.03	25892	25892	CAL27_CURCUMIN_pTy_R1.raw
1	VVQEYIDAFSDyANFK	Y12;	Replicate 1	Unambiguous	PTPRA	NP_543030.1	5786	receptor-type tyrosine-protein phosphatase alpha isoform 2 precursor	2	1	18450369	Y12(Phospho)	1	Y(5): 0.0; S(10): 0.0; Y(12): 100.0	1	11489			201800000	Light	Redundant	Not	0.692	201800000	231400000		50	0.000246131	0	31	3	663.628	1988.87	0.62	102.03	25893	25893	CAL27_CURCUMIN_pTy_R1.raw
1	VVQEYIDAFSDyANFK	Y12;	Replicate 1	Unambiguous	PTPRA	NP_543030.1	5786	receptor-type tyrosine-protein phosphatase alpha isoform 2 precursor	2	1	18450369	Y12(Phospho)	1	Y(5): 0.0; S(10): 0.0; Y(12): 100.0	1	11432			466600000	Light	Redundant	Not	0.972	385600000	314800000		73	1.33791e-06	0	18	2	994.939	1988.87	1.61	101.48	25745	25745	CAL27_CURCUMIN_pTy_R1.raw
1	LSLGQyDNDAGGQLPFSK	Y6;	Replicate 1	Unambiguous	TNS3	NP_073585.8	64759	tensin-3	1	1	65288071	Y6(Phospho)	1	S(2): 0.0; Y(6): 100.0; S(17): 0.0	1	8327			20050000	Light	Redundant	Not	0.693	20050000	22960000		97	5.18974e-09	0	0	2	995.451	1989.89	-0.68	81.89	20500	20500	CAL27_CURCUMIN_pTy_R1.raw
1	SSGSPyGGGYGSGGGSGGYGSR	Y6;	Replicate 1	Unambiguous	HNRNPA3	NP_919223.1	220988	heterogeneous nuclear ribonucleoprotein A3	1	1	34740329	Y6(Phospho)	1	S(1): 0.0; S(2): 0.0; S(4): 0.0; Y(6): 100.0; Y(10): 0.0; S(12): 0.0; S(16): 0.0; Y(19): 0.0; S(21): 0.0	1	782		1	4819000	Light	Excluded by Method	Not	8.13225	1828000	178400		43	0.000901481	0	8	2	995.881	1990.75	-1.21	33.23	7456	7456	CAL27_CURCUMIN_pTy_R1.raw
1	SSGSPyGGGYGSGGGSGGYGSR	Y6;	Replicate 1	Unambiguous	HNRNPA3	NP_919223.1	220988	heterogeneous nuclear ribonucleoprotein A3	1	1	34740329	S16(Phospho)	1	S(1): 0.0; S(2): 0.0; S(4): 0.0; Y(6): 100.0; Y(10): 0.0; S(12): 0.0; S(16): 0.0; Y(19): 0.0; S(21): 0.0	1	929		1	5483000	Light	Excluded by Method	Not	14.1926	2196000	122800		39	0.00275395	0	4	2	995.881	1990.76	-0.48	34.82	7884	7884	CAL27_CURCUMIN_pTy_R1.raw
1	yGQFSGLNPGGRPITPPR	Y1;	Replicate 1	Unambiguous	PPP1CA	NP_996756.1	5499	serine/threonine-protein phosphatase PP1-alpha catalytic subunit isoform 2	3	1	45827798	Y1(Phospho)	1	Y(1): 100.0; S(5): 0.0; T(15): 0.0	1	5884			52170000	Light	Redundant	Not	4.31	46340000	8531000		32	0.0174832	0	14	3	665.327	1993.97	0.48	66.4	16358	16358	CAL27_CURCUMIN_pTy_R1.raw
1	yGQFSGLNPGGRPITPPR	Y1;	Replicate 1	Unambiguous	PPP1CA	NP_996756.1	5499	serine/threonine-protein phosphatase PP1-alpha catalytic subunit isoform 2	3	1	45827798	Y1(Phospho)	1	Y(1): 100.0; S(5): 0.0; T(15): 0.0	1	5981	1		14300000	Light	Excluded by Method	Not	100	5035000	5315		32	0.0156041	0	5	3	665.327	1993.97	1.03	66.95	16505	16505	CAL27_CURCUMIN_pTy_R1.raw
1	VVQEYIDAFSDyANFK	Y12;	Replicate 1	Unambiguous	PTPRA	NP_543030.1	5786	receptor-type tyrosine-protein phosphatase alpha isoform 2 precursor	2	1	18450369	Y12(Phospho); K16(Label:13C(6))	1	Y(5): 0.0; S(10): 0.0; Y(12): 100.0	1	11529			425800000	Heavy	Redundant	Not	0.9	483100000	425800000		75	7.87705e-07	0	7	2	997.948	1994.89	0.15	102.02	25891	25891	CAL27_CURCUMIN_pTy_R1.raw
1	VVQEYIDAFSDyANFK	Y12;	Replicate 1	Unambiguous	PTPRA	NP_543030.1	5786	receptor-type tyrosine-protein phosphatase alpha isoform 2 precursor	2	1	18450369	Y12(Phospho); K16(Label:13C(6))	1	Y(5): 0.0; S(10): 0.0; Y(12): 100.0	1	11489			231900000	Heavy	Redundant	Not	0.692	201800000	231400000		73	1.31756e-06	0	21	3	665.635	1994.89	0.54	101.78	25826	25826	CAL27_CURCUMIN_pTy_R1.raw
1	VVQEYIDAFSDyANFK	Y12;	Replicate 1	Unambiguous	PTPRA	NP_543030.1	5786	receptor-type tyrosine-protein phosphatase alpha isoform 2 precursor	2	1	18450369	Y12(Phospho); K16(Label:13C(6))	1	Y(5): 0.0; S(10): 0.0; Y(12): 100.0	1	11432			314800000	Heavy	Redundant	Not	0.972	385600000	314800000		68	5.14515e-06	0	35	2	997.949	1994.89	1.19	101.47	25741	25741	CAL27_CURCUMIN_pTy_R1.raw
1	NLSEGNNANYTEyVATR	Y13;	Replicate 1	Unambiguous	CDKL5	NP_003150.1	6792	cyclin-dependent kinase-like 5	1	1	4507281	Y13(Phospho)	1	S(3): 0.0; Y(10): 0.0; T(11): 0.6; Y(13): 99.4; T(16): 0.0	1	3854		1	985500	Light	Excluded by Method	Not	0.438478	497400	900300		42	0.00145698	0	26	2	998.429	1995.85	2.74	54.27	13121	13121	CAL27_CURCUMIN_pTy_R1.raw
1	LSLGQyDNDAGGQLPFSK	Y6;	Replicate 1	Unambiguous	TNS3	NP_073585.8	64759	tensin-3	1	1	65288071	Y6(Phospho); K18(Label:13C(6))	1	S(2): 0.0; Y(6): 100.0; S(17): 0.0	1	8327			22960000	Heavy	Redundant	Not	0.693	20050000	22960000		84	1.20738e-07	0	27	2	998.461	1995.91	-0.61	82.45	20648	20648	CAL27_CURCUMIN_pTy_R1.raw
1	LSLGQyDNDAGGQLPFSK	Y6;	Replicate 1	Unambiguous	TNS3	NP_073585.8	64759	tensin-3	1	1	65288071	Y6(Phospho); K18(Label:13C(6))	1	S(2): 0.0; Y(6): 100.0; S(17): 0.0	1	8327			22960000	Heavy	Redundant	Not	0.693	20050000	22960000		87	5.86757e-08	0	34	2	998.464	1995.92	2.2	81.87	20493	20493	CAL27_CURCUMIN_pTy_R1.raw
1	EEDEHPyELLLTAETK	Y7;	Replicate 1	Unambiguous	ANKS1A	NP_056060.2	23294	ankyrin repeat and SAM domain-containing protein 1A	1	1	140161500	Y7(Phospho)	1	Y(7): 99.3; T(12): 0.7; T(15): 0.0	1	8052			5017000	Light	Unique	Used	1.169	5017000	3407000		25	0.104875	0	0	2	998.946	1996.88	2.96	80.15	20037	20037	CAL27_CURCUMIN_pTy_R1.raw
1	VPIVINPNAyDNLAIYK	Y10;	Replicate 1	Unambiguous	PEAK1	NP_079052.2	79834	pseudopodium-enriched atypical kinase 1	1	1	148368962	Y10(Phospho)	1	Y(10): 100.0; Y(16): 0.0	1	10889			11040000	Light	Redundant	Not	0.722	11040000	12140000		37	0.00404535	0	8	2	999.014	1997.02	2.95	98.19	24862	24862	CAL27_CURCUMIN_pTy_R1.raw
1	VVQDFIDIFSDyANFK	Y12;	Replicate 1	Unambiguous	PTPRE	NP_569119.1	5791	receptor-type tyrosine-protein phosphatase epsilon isoform 2	2	1	18860859	Y12(Phospho)	1	S(10): 0.0; Y(12): 100.0	1	15341			8353000	Light	Redundant	Not	0.61	8353000	10870000		66	5.32448e-06	0	28	2	1000.96	2000.9	-0.18	125.04	32067	32067	CAL27_CURCUMIN_pTy_R1.raw
1	VPIVINPNAyDNLAIYK	Y10;	Replicate 1	Unambiguous	PEAK1	NP_079052.2	79834	pseudopodium-enriched atypical kinase 1	1	1	148368962	Y10(Phospho); K17(Label:13C(6))	1	Y(10): 100.0; Y(16): 0.0	1	10889			15700000	Heavy	Redundant	Not	0.722	11040000	12140000		36	0.00473104	0	29	2	1002.02	2003.04	0.57	98.19	24861	24861	CAL27_CURCUMIN_pTy_R1.raw
1	VVQDFIDIFSDyANFK	Y12;	Replicate 1	Unambiguous	PTPRE	NP_569119.1	5791	receptor-type tyrosine-protein phosphatase epsilon isoform 2	2	1	18860859	Y12(Phospho); K16(Label:13C(6))	1	S(10): 0.0; Y(12): 100.0	1	15365			32530000	Heavy	Redundant	Not	0.56	22970000	32530000		57	5.4797e-05	0	2	2	1003.97	2006.92	0.07	125.16	32100	32100	CAL27_CURCUMIN_pTy_R1.raw
1	IySFNSTNDSSGPANLDK	Y2;	Replicate 1	Unambiguous	DHX29	NP_061903.2	54505	ATP-dependent RNA helicase DHX29	1	1	67782362	Y2(Phospho)	1	Y(2): 99.5; S(3): 0.5; S(6): 0.0; T(7): 0.0; S(10): 0.0; S(11): 0.0	1	4333	1		1697000	Light	Excluded by Method	Not	100	934100	5315		89	3.38694e-08	0	0	2	1005.43	2009.85	0.27	57.15	13888	13888	CAL27_CURCUMIN_pTy_R1.raw
1	NEEENIySVPHDSTQGK	Y7;	Replicate 1	Unambiguous	ARHGAP35	NP_004482.4	2909	rho GTPase-activating protein 35	1	1	150417981	Y7(Phospho)	1	Y(7): 99.5; S(8): 0.5; S(13): 0.0; T(14): 0.0	1	1755			62220000	Light	Redundant	Not	1.184	61430000	41180000		67	5.20073e-06	0	0	2	1013.92	2026.84	0.6	40.87	9521	9521	CAL27_CURCUMIN_pTy_R1.raw
1	NEEENIySVPHDSTQGK	Y7;	Replicate 1	Unambiguous	ARHGAP35	NP_004482.4	2909	rho GTPase-activating protein 35	1	1	150417981	Y7(Phospho)	1	Y(7): 99.5; S(8): 0.5; S(13): 0.0; T(14): 0.0	1	1755			62220000	Light	Redundant	Not	1.184	61430000	41180000		88	3.9e-08	0	0	2	1013.92	2026.84	0.6	41.39	9659	9659	CAL27_CURCUMIN_pTy_R1.raw
1	NEEENIySVPHDSTQGK	Y7;	Replicate 1	Unambiguous	ARHGAP35	NP_004482.4	2909	rho GTPase-activating protein 35	1	1	150417981	Y7(Phospho)	1	Y(7): 99.5; S(8): 0.5; S(13): 0.0; T(14): 0.0	1	1744			257900000	Light	Redundant	Not	1.181	257900000	173400000		41	0.00215806	0	5	3	676.285	2026.84	0.66	41.33	9645	9645	CAL27_CURCUMIN_pTy_R1.raw
1	ERVTPPEGyEVVTVFPK	Y9;	Replicate 1	Unambiguous	PDLIM1	NP_066272.1	9124	PDZ and LIM domain protein 1	1	1	13994151	Y9(Phospho)	1	T(4): 0.0; Y(9): 100.0; T(13): 0.0	1	8204		1	12010000	Light	Excluded by Method	Not	9.11244	4355000	379300		35	0.0082031	1	18	3	676.334	2026.99	-0.51	81.14	20300	20300	CAL27_CURCUMIN_pTy_R1.raw
1	FIHQQPQSSSPVyGSSAK	Y13;	Replicate 1	Unambiguous	PXN	NP_002850.2	5829	paxillin isoform 1	3	1	170932516	Y13(Phospho)	1	S(8): 33.3; S(9): 33.3; S(10): 33.3; Y(13): 100.0; S(15): 0.0; S(16): 0.0	1	1127			423200000	Light	Redundant	Not	1.099	423200000	305500000		26	0.0693627	0	26	3	676.644	2027.92	-2.33	37.55	8621	8621	CAL27_CURCUMIN_pTy_R1.raw
1	FIHQQPQSSSPVyGSSAK	Y13;	Replicate 1	Unambiguous	PXN	NP_002850.2	5829	paxillin isoform 1	3	1	170932516	S16(Phospho)	1	S(8): 33.3; S(9): 33.3; S(10): 33.3; Y(13): 100.0; S(15): 0.0; S(16): 0.0	1	1127			423200000	Light	Redundant	Not	1.099	423200000	305500000		30	0.0276339	0	0	3	676.645	2027.92	-1.34	36.46	8328	8328	CAL27_CURCUMIN_pTy_R1.raw
1	FIHQQPQSSSPVyGSSAK	Y13;	Replicate 1	Unambiguous	PXN	NP_002850.2	5829	paxillin isoform 1	3	1	170932516	Y13(Phospho)	1	S(8): 33.3; S(9): 33.3; S(10): 33.3; Y(13): 100.0; S(15): 0.0; S(16): 0.0	1	1131			75010000	Light	Redundant	Not	1.103	73890000	53170000		67	6.1291e-06	0	0	2	1014.47	2027.92	0.35	37.01	8475	8475	CAL27_CURCUMIN_pTy_R1.raw
1	FIHQQPQSSSPVyGSSAK	Y13;	Replicate 1	Unambiguous	PXN	NP_002850.2	5829	paxillin isoform 1	3	1	170932516	Y13(Phospho)	1	S(8): 33.3; S(9): 33.3; S(10): 33.3; Y(13): 100.0; S(15): 0.0; S(16): 0.0	1	1127			423200000	Light	Redundant	Not	1.099	423200000	305500000		42	0.00188173	0	0	3	676.647	2027.93	2.54	37	8471	8471	CAL27_CURCUMIN_pTy_R1.raw
1	LNGPQDHSHLLySTIPR	Y12;	Replicate 1	Unambiguous	CTNND1	NP_001193818.1	1500	catenin delta-1 isoform 2A	10	1	332688218	Y12(Phospho)	1	S(8): 0.0; Y(12): 99.4; S(13): 0.6; T(14): 0.0	1	5351			47390000	Light	Redundant	Not	4.324	47390000	8698000		54	0.000136525	0	45	3	676.662	2027.97	0.1	63.2	15499	15499	CAL27_CURCUMIN_pTy_R1.raw
1	LNGPQDHSHLLySTIPR	Y12;	Replicate 1	Unambiguous	CTNND1	NP_001193818.1	1500	catenin delta-1 isoform 2A	10	1	332688218	Y12(Phospho)	1	S(8): 0.0; Y(12): 99.4; S(13): 0.6; T(14): 0.0	1	5351			47390000	Light	Redundant	Not	4.324	47390000	8698000		45	0.00109282	0	9	3	676.662	2027.97	1.36	63.76	15649	15649	CAL27_CURCUMIN_pTy_R1.raw
1	NEEENIySVPHDSTQGK	Y7;	Replicate 1	Unambiguous	ARHGAP35	NP_004482.4	2909	rho GTPase-activating protein 35	1	1	150417981	Y7(Phospho); K17(Label:13C(6))	1	Y(7): 99.5; S(8): 0.5; S(13): 0.0; T(14): 0.0	1	1744			173400000	Heavy	Redundant	Not	1.181	257900000	173400000		52	0.000137313	0	11	3	678.291	2032.86	-0.69	40.94	9539	9539	CAL27_CURCUMIN_pTy_R1.raw
1	NEEENIySVPHDSTQGK	Y7;	Replicate 1	Unambiguous	ARHGAP35	NP_004482.4	2909	rho GTPase-activating protein 35	1	1	150417981	Y7(Phospho); K17(Label:13C(6))	1	Y(7): 99.5; S(8): 0.5; S(13): 0.0; T(14): 0.0	1	1744			173400000	Heavy	Redundant	Not	1.181	257900000	173400000		34	0.0089887	0	13	3	678.291	2032.86	-0.33	41.48	9684	9684	CAL27_CURCUMIN_pTy_R1.raw
1	NEEENIySVPHDSTQGK	Y7;	Replicate 1	Unambiguous	ARHGAP35	NP_004482.4	2909	rho GTPase-activating protein 35	1	1	150417981	Y7(Phospho); K17(Label:13C(6))	1	Y(7): 99.5; S(8): 0.5; S(13): 0.0; T(14): 0.0	1	1755			41180000	Heavy	Redundant	Not	1.184	61430000	41180000		85	7.14824e-08	0	4	2	1016.93	2032.86	0.49	41.45	9674	9674	CAL27_CURCUMIN_pTy_R1.raw
1	NEEENIySVPHDSTQGK	Y7;	Replicate 1	Unambiguous	ARHGAP35	NP_004482.4	2909	rho GTPase-activating protein 35	1	1	150417981	Y7(Phospho); K17(Label:13C(6))	1	Y(7): 99.5; S(8): 0.5; S(13): 0.0; T(14): 0.0	1	1755			41180000	Heavy	Redundant	Not	1.184	61430000	41180000		34	0.00933125	0	0	2	1016.93	2032.86	1.21	40.91	9531	9531	CAL27_CURCUMIN_pTy_R1.raw
1	FIHQQPQSSSPVyGSSAK	Y13;	Replicate 1	Unambiguous	PXN	NP_002850.2	5829	paxillin isoform 1	3	1	170932516	Y13(Phospho); K18(Label:13C(6))	1	S(8): 33.3; S(9): 33.3; S(10): 33.3; Y(13): 100.0; S(15): 0.0; S(16): 0.0	1	1131			53170000	Heavy	Unique	Used	1.103	73890000	53170000		23	0.144786	0	13	2	1017.47	2033.94	-0.9	36.56	8353	8353	CAL27_CURCUMIN_pTy_R1.raw
1	FIHQQPQSSSPVyGSSAK	Y13;	Replicate 1	Unambiguous	PXN	NP_002850.2	5829	paxillin isoform 1	3	1	170932516	Y13(Phospho); K18(Label:13C(6))	1	S(8): 33.3; S(9): 33.3; S(10): 33.3; Y(13): 100.0; S(15): 0.0; S(16): 0.0	1	1127			305500000	Heavy	Redundant	Not	1.099	423200000	305500000		51	0.000220296	0	7	3	678.652	2033.94	-0.25	37.01	8474	8474	CAL27_CURCUMIN_pTy_R1.raw
1	FIHQQPQSSSPVyGSSAK	Y13;	Replicate 1	Unambiguous	PXN	NP_002850.2	5829	paxillin isoform 1	3	1	170932516	Y13(Phospho); K18(Label:13C(6))	1	S(8): 33.3; S(9): 33.3; S(10): 33.3; Y(13): 100.0; S(15): 0.0; S(16): 0.0	1	1131			53170000	Heavy	Redundant	Not	1.103	73890000	53170000		53	0.00015907	0	1	2	1017.48	2033.94	0.42	37.09	8496	8496	CAL27_CURCUMIN_pTy_R1.raw
1	FIHQQPQSSSPVyGSSAK	Y13;	Replicate 1	Unambiguous	PXN	NP_002850.2	5829	paxillin isoform 1	3	1	170932516	S16(Phospho); K18(Label:13C(6))	1	S(8): 33.3; S(9): 33.3; S(10): 33.3; Y(13): 100.0; S(15): 0.0; S(16): 0.0	1	1127			305500000	Heavy	Redundant	Not	1.099	423200000	305500000		28	0.0448462	0	28	3	678.653	2033.94	1.1	36.49	8336	8336	CAL27_CURCUMIN_pTy_R1.raw
1	AGVDyAPNLPPFPSPADVK	Y5;	Replicate 1	Unambiguous	TNS3	NP_073585.8	64759	tensin-3	1	1	65288071	Y5(Phospho)	1	Y(5): 100.0; S(14): 0.0	1	10444			8417000	Light	Redundant	Not	0.651	8417000	10270000		31	0.0232236	0	19	2	1017.98	2034.95	-1.2	95.45	24125	24125	CAL27_CURCUMIN_pTy_R1.raw
2	HyEDGYPGGSDNyGSLSR	Y2; Y13;	Replicate 1	Unambiguous	CTNND1	NP_001193818.1	1500	catenin delta-1 isoform 2A	15	1	332688218	Y13(Phospho)	1	Y(2): 100.0; Y(6): 0.0; S(10): 0.0; Y(13): 98.9; S(15): 1.1; S(17): 0.0	1	2415			160600000	Light	Redundant	Not	5.562	159400000	22750000		51	0.000143204	0	14	3	685.269	2053.79	0.08	45.13	10669	10669	CAL27_CURCUMIN_pTy_R1.raw
2	HyEDGYPGGSDNyGSLSR	Y2; Y13;	Replicate 1	Unambiguous	CTNND1	NP_001193818.1	1500	catenin delta-1 isoform 2A	15	1	332688218	Y13(Phospho)	1	Y(2): 100.0; Y(6): 0.0; S(10): 0.0; Y(13): 98.9; S(15): 1.1; S(17): 0.0	1	2436			67260000	Light	Redundant	Not	6.068	65780000	8601000		90	2.02282e-08	0	0	2	1027.4	2053.79	0.3	45.57	10787	10787	CAL27_CURCUMIN_pTy_R1.raw
2	HyEDGYPGGSDNyGSLSR	Y2; Y13;	Replicate 1	Unambiguous	CTNND1	NP_001193818.1	1500	catenin delta-1 isoform 2A	15	1	332688218	Y6(Phospho)	1	Y(2): 100.0; Y(6): 0.0; S(10): 0.0; Y(13): 98.9; S(15): 1.1; S(17): 0.0	1	2588	1		3121000	Light	Excluded by Method	Not	100	966300	5315		25	0.0647078	0	50	3	685.269	2053.79	0.35	46.29	10979	10979	CAL27_CURCUMIN_pTy_R1.raw
2	HyEDGYPGGSDNyGSLSR	Y2; Y13;	Replicate 1	Unambiguous	CTNND1	NP_001193818.1	1500	catenin delta-1 isoform 2A	15	1	332688218	Y13(Phospho)	1	Y(2): 100.0; Y(6): 0.0; S(10): 0.0; Y(13): 98.9; S(15): 1.1; S(17): 0.0	1	2415			160600000	Light	Redundant	Not	5.562	159400000	22750000		54	7.48095e-05	0	4	3	685.269	2053.79	0.44	45.67	10813	10813	CAL27_CURCUMIN_pTy_R1.raw
2	HyEDGYPGGSDNyGSLSR	Y2; Y13;	Replicate 1	Unambiguous	CTNND1	NP_001193818.1	1500	catenin delta-1 isoform 2A	15	1	332688218	Y13(Phospho); R18(Label:13C(6))	1	Y(2): 100.0; Y(6): 0.0; S(10): 0.0; Y(13): 98.9; S(15): 1.1; S(17): 0.0	1	2415			22750000	Heavy	Redundant	Not	5.562	159400000	22750000		43	0.00107493	0	50	3	687.274	2059.81	-2.31	45.26	10704	10704	CAL27_CURCUMIN_pTy_R1.raw
1	ATGNQPPPLVGTyNTLLSR	Y13;	Replicate 1	Unambiguous	DCBLD2	NP_563615.3	131566	discoidin, CUB and LCCL domain-containing protein 2 precursor	1	1	54792129	T15(Phospho)	1	T(2): 0.0; T(12): 0.7; Y(13): 99.3; T(15): 0.0; S(18): 0.0	1	8419			10290000	Light	Redundant	Not	4.418	9634000	1731000		31	0.0182494	0	0	2	1040.02	2079.03	0.25	82.49	20658	20658	CAL27_CURCUMIN_pTy_R1.raw
1	ATGNQPPPLVGTyNTLLSR	Y13;	Replicate 1	Unambiguous	DCBLD2	NP_563615.3	131566	discoidin, CUB and LCCL domain-containing protein 2 precursor	1	1	54792129	T15(Phospho)	1	T(2): 0.0; T(12): 0.7; Y(13): 99.3; T(15): 0.0; S(18): 0.0	1	8486			3381000	Light	Redundant	Not	3.88	2732000	558600		34	0.0093391	0	0	2	1040.02	2079.03	0.48	83.01	20792	20792	CAL27_CURCUMIN_pTy_R1.raw
1	ATGNQPPPLVGTyNTLLSR	Y13;	Replicate 1	Unambiguous	DCBLD2	NP_563615.3	131566	discoidin, CUB and LCCL domain-containing protein 2 precursor	1	1	54792129	Y13(Phospho)	1	T(2): 0.0; T(12): 0.7; Y(13): 99.3; T(15): 0.0; S(18): 0.0	1	8461			5917000	Light	Redundant	Not	5.572	5216000	742900		49	0.000293782	0	11	3	693.682	2079.03	1.47	82.78	20735	20735	CAL27_CURCUMIN_pTy_R1.raw
1	APVDFGyVGIDSILEQMR	Y7;	Replicate 1	Unambiguous	42256	NP_001106968.1	10801	septin-9 isoform f	6	1	164698504	Y7(Phospho)	1	Y(7): 100.0; S(12): 0.0	1	16047			9901000	Light	Redundant	Not	2.206	9050000	3255000		58	5.06843e-05	0	31	2	1045.49	2089.97	0.15	129.16	33175	33175	CAL27_CURCUMIN_pTy_R1.raw
1	NyGSYSTQASAAAATAELLK	Y2;	Replicate 1	Unambiguous	SCAMP3	NP_443069.1	10067	secretory carrier-associated membrane protein 3 isoform 2	2	1	16445421	Y2(Phospho)	1	Y(2): 99.4; S(4): 0.6; Y(5): 0.0; S(6): 0.0; T(7): 0.0; S(10): 0.0; T(15): 0.0	1	9544	1		3621000	Light	Excluded by Method	Not	100	1189000	5315		64	1.15423e-05	0	29	2	1048.98	2096.96	1.97	89.9	22637	22637	CAL27_CURCUMIN_pTy_R1.raw
2	IyIDPFTyEDPNEAVR	Y2; Y8;	Replicate 1	Unambiguous	EPHB2	NP_059145.2	2048	ephrin type-B receptor 2 isoform 1 precursor	3	1	111118978	Y2(Phospho); Y8(Phospho)	1	Y(2): 100.0; T(7): 0.7; Y(8): 99.3	1	10164	1		11200000	Light	Excluded by Method	Not	100	4124000	5315		46	0.000606724	0	14	2	1051.43	2101.86	0.19	93.74	23666	23666	CAL27_CURCUMIN_pTy_R1.raw
2	IyIDPFTyEDPNEAVR	Y2; Y8;	Replicate 1	Unambiguous	EPHB2	NP_059145.2	2048	ephrin type-B receptor 2 isoform 1 precursor	3	1	111118978	Y2(Phospho); Y8(Phospho); R16(Label:13C(6))	1	Y(2): 100.0; T(7): 0.7; Y(8): 99.3	1						No Quan Values	Not					34	0.0114018	0	65	2	1054.44	2107.87	-3.34	93.87	23700	23700	CAL27_CURCUMIN_pTy_R1.raw
1	FIHQQPQSSSPVyGSSAK	Y13;	Replicate 1	Unambiguous	PXN	NP_002850.2	5829	paxillin isoform 1	3	1	170932516	S10(Phospho); Y13(Phospho)	1	S(8): 33.3; S(9): 33.3; S(10): 33.3; Y(13): 100.0; S(15): 0.0; S(16): 0.0	1	833			42510000	Light	Redundant	Not	0.949	41920000	35050000		35	0.00861715	0	25	3	703.301	2107.89	-0.66	34.62	7833	7833	CAL27_CURCUMIN_pTy_R1.raw
1	FIHQQPQSSSPVyGSSAK	Y13;	Replicate 1	Unambiguous	PXN	NP_002850.2	5829	paxillin isoform 1	3	1	170932516	S10(Phospho); Y13(Phospho)	1	S(8): 33.3; S(9): 33.3; S(10): 33.3; Y(13): 100.0; S(15): 0.0; S(16): 0.0	1	868			12940000	Light	Redundant	Not	0.936	12860000	10900000		31	0.0226276	0	0	2	1054.45	2107.89	0.97	34.93	7916	7916	CAL27_CURCUMIN_pTy_R1.raw
1	FIHQQPQSSSPVyGSSAK	Y13;	Replicate 1	Unambiguous	PXN	NP_002850.2	5829	paxillin isoform 1	3	1	170932516	S10(Phospho); Y13(Phospho); K18(Label:13C(6))	1	S(8): 33.3; S(9): 33.3; S(10): 33.3; Y(13): 100.0; S(15): 0.0; S(16): 0.0	1	833			35050000	Heavy	Redundant	Not	0.949	41920000	35050000		41	0.00235049	0	7	3	705.308	2113.91	-0.05	34.84	7890	7890	CAL27_CURCUMIN_pTy_R1.raw
1	FIHQQPQSSSPVyGSSAK	Y13;	Replicate 1	Unambiguous	PXN	NP_002850.2	5829	paxillin isoform 1	3	1	170932516	S10(Phospho); Y13(Phospho); K18(Label:13C(6))	1	S(8): 33.3; S(9): 33.3; S(10): 33.3; Y(13): 100.0; S(15): 0.0; S(16): 0.0	1	868			10900000	Heavy	Redundant	Not	0.936	12860000	10900000		26	0.0752767	0	2	2	1057.46	2113.91	0.91	34.87	7898	7898	CAL27_CURCUMIN_pTy_R1.raw
1	TFLRPSPEDEAIyGPNTK	Y13;	Replicate 1	Unambiguous	TJP2	NP_001163886.1	9414	tight junction protein ZO-2 isoform 4	6	1	282165804	Y13(Phospho)	1	T(1): 0.0; S(6): 0.0; Y(13): 99.2; T(17): 0.8	1	5580		1	5010000	Light	Excluded by Method	Not	14.3753	1601000	88390		30	0.0320787	0	31	3	705.666	2114.98	1.54	64.58	15871	15871	CAL27_CURCUMIN_pTy_R1.raw
2	KLsLGQyDNDAGGQLPFSK	S3; Y7;	Replicate 1	Unambiguous	TNS3	NP_073585.8	64759	tensin-3	1	1	65288071	Y7(Phospho)	1	S(3): 100.0; Y(7): 100.0; S(18): 0.0	1	7384			9608000	Light	Redundant	Not	0.573	7891000	10930000		67	6.25531e-06	1	8	3	706.669	2117.99	1.57	75.67	18840	18840	CAL27_CURCUMIN_pTy_R1.raw
2	KLsLGQyDNDAGGQLPFSK	S3; Y7;	Replicate 1	Unambiguous	TNS3	NP_073585.8	64759	tensin-3	1	1	65288071	Y7(Phospho)	1	S(3): 100.0; Y(7): 100.0; S(18): 0.0	1	7384			9608000	Light	Redundant	Not	0.573	7891000	10930000		24	0.0903466	1	36	3	706.671	2118	4.17	76.23	18989	18989	CAL27_CURCUMIN_pTy_R1.raw
2	RSDsASSEPVGIyQGFEK	S4; Y13;	Replicate 1	Unambiguous	PRKCD	NP_997704.1	5580	protein kinase C delta type	1	1	47157325	R1(Label:13C(6)); S4(Phospho); Y13(Phospho); K18(Label:13C(6))	1	S(2): 1.1; S(4): 98.9; S(6): 0.0; S(7): 0.0; Y(13): 100.0	1	4743		1	508900	Heavy	Excluded by Method	Not	9.47734	6077000	508900		26	0.0523946	1	0	2	1064.96	2128.91	2.58	59.66	14557	14557	CAL27_CURCUMIN_pTy_R1.raw
2	HyEDGYPGGSDNyGSLSR	Y2; Y13;	Replicate 1	Unambiguous	CTNND1	NP_001193818.1	1500	catenin delta-1 isoform 2A	15	1	332688218	Y2(Phospho); Y13(Phospho)	1	Y(2): 100.0; Y(6): 0.0; S(10): 0.0; Y(13): 98.9; S(15): 1.1; S(17): 0.0	1	2162	1		2097000	Light	Excluded by Method	Not	100	725400	5315		23	0.0970413	0	0	3	711.924	2133.76	-0.67	43.5	10227	10227	CAL27_CURCUMIN_pTy_R1.raw
1	VCAYGAQGEGPySSLVSCR	Y12;	Replicate 1	Unambiguous	ITGB4	NP_001005731.1	3691	integrin beta-4 isoform 3 precursor	3	1	54607033	C2(Carbamidomethyl); S13(Phospho); C18(Carbamidomethyl)	1	Y(4): 0.0; Y(12): 99.5; S(13): 0.5; S(14): 0.0; S(17): 0.0	1	4809			21770000	Light	Redundant	Not	0.969	21770000	17840000		47	0.000415369	0	0	2	1070.94	2140.88	-0.22	59.99	14644	14644	CAL27_CURCUMIN_pTy_R1.raw
1	VCAYGAQGEGPySSLVSCR	Y12;	Replicate 1	Unambiguous	ITGB4	NP_001005731.1	3691	integrin beta-4 isoform 3 precursor	3	1	54607033	C2(Carbamidomethyl); Y12(Phospho); C18(Carbamidomethyl)	1	Y(4): 0.0; Y(12): 99.5; S(13): 0.5; S(14): 0.0; S(17): 0.0	1	4915			19400000	Light	Redundant	Not	0.991	19400000	15540000		55	5.97337e-05	0	15	3	714.299	2140.88	0.52	60.65	14818	14818	CAL27_CURCUMIN_pTy_R1.raw
1	VCAYGAQGEGPySSLVSCR	Y12;	Replicate 1	Unambiguous	ITGB4	NP_001005731.1	3691	integrin beta-4 isoform 3 precursor	3	1	54607033	C2(Carbamidomethyl); Y12(Phospho); C18(Carbamidomethyl)	1	Y(4): 0.0; Y(12): 99.5; S(13): 0.5; S(14): 0.0; S(17): 0.0	1	4889			26810000	Light	Redundant	Not	1.025	26230000	20310000		92	1.25713e-08	0	0	2	1070.95	2140.89	1.04	60.5	14779	14779	CAL27_CURCUMIN_pTy_R1.raw
1	VCAYGAQGEGPySSLVSCR	Y12;	Replicate 1	Unambiguous	ITGB4	NP_001005731.1	3691	integrin beta-4 isoform 3 precursor	3	1	54607033	C2(Carbamidomethyl); Y12(Phospho); C18(Carbamidomethyl)	1	Y(4): 0.0; Y(12): 99.5; S(13): 0.5; S(14): 0.0; S(17): 0.0	1	4818			11980000	Light	Redundant	Not	1.347	11980000	7057000		30	0.0235212	0	7	3	714.3	2140.89	1.46	60.04	14658	14658	CAL27_CURCUMIN_pTy_R1.raw
1	VCAYGAQGEGPySSLVSCR	Y12;	Replicate 1	Unambiguous	ITGB4	NP_001005731.1	3691	integrin beta-4 isoform 3 precursor	3	1	54607033	C2(Carbamidomethyl); Y12(Phospho); C18(Carbamidomethyl); R19(Label:13C(6))	1	Y(4): 0.0; Y(12): 99.5; S(13): 0.5; S(14): 0.0; S(17): 0.0	1	4818			7158000	Heavy	Redundant	Not	1.347	11980000	7057000		41	0.00226225	0	43	3	716.306	2146.9	0.44	60.1	14674	14674	CAL27_CURCUMIN_pTy_R1.raw
1	VCAYGAQGEGPySSLVSCR	Y12;	Replicate 1	Unambiguous	ITGB4	NP_001005731.1	3691	integrin beta-4 isoform 3 precursor	3	1	54607033	C2(Carbamidomethyl); Y12(Phospho); C18(Carbamidomethyl); R19(Label:13C(6))	1	Y(4): 0.0; Y(12): 99.5; S(13): 0.5; S(14): 0.0; S(17): 0.0	1	4889			20310000	Heavy	Redundant	Not	1.025	26230000	20310000		71	1.92741e-06	0	0	2	1073.96	2146.91	1.55	60.71	14835	14835	CAL27_CURCUMIN_pTy_R1.raw
1	ALSVGNIDDALQCySEAIK	Y14;	Replicate 1	Unambiguous	STIP1	NP_006810.1	10963	stress-induced-phosphoprotein 1 isoform b	3	1	5803181	C13(Carbamidomethyl); Y14(Phospho)	1	S(3): 0.0; Y(14): 99.2; S(15): 0.8	1						No Quan Values	Not					38	0.00440498	0	61	2	1073.99	2146.97	-0.12	99.34	25169	25169	CAL27_CURCUMIN_pTy_R1.raw
1	GVITDQNSDGyCQTGTMSR	Y11;	Replicate 1	Unambiguous	DSP	NP_001008844.1	1832	desmoplakin isoform II	2	1	58530842	Y11(Phospho); C12(Carbamidomethyl)	1	T(4): 0.0; S(8): 0.0; Y(11): 100.0; T(14): 0.0; T(16): 0.0; S(18): 0.0	1	1947			11170000	Light	Redundant	Not	4.724	10010000	1681000		95	7.38819e-09	0	69	2	1085.43	2169.86	-0.02	42.22	9879	9879	CAL27_CURCUMIN_pTy_R1.raw
1	yQPLASTASDNDFVTPEPR	Y1;	Replicate 1	Unambiguous	NCAPD2	NP_055680.3	9918	condensin complex subunit 1	1	1	178056552	Y1(Phospho)	1	Y(1): 100.0; S(6): 0.0; T(7): 0.0; S(9): 0.0; T(15): 0.0	1	6176	1		2980000	Light	Excluded by Method	Not	100	1021000	5315		71	2.23244e-06	0	0	2	1094.48	2187.96	-0.77	68.08	16810	16810	CAL27_CURCUMIN_pTy_R1.raw
2	KLsLGQyDNDAGGQLPFSK	S3; Y7;	Replicate 1	Unambiguous	TNS3	NP_073585.8	64759	tensin-3	1	1	65288071	S3(Phospho); Y7(Phospho)	1	S(3): 100.0; Y(7): 100.0; S(18): 0.0	1	7973			12740000	Light	Unique	Used	1.679	11620000	5490000		49	0.000353057	1	16	3	733.324	2197.96	-0.21	79.6	19889	19889	CAL27_CURCUMIN_pTy_R1.raw
2	KLsLGQyDNDAGGQLPFSK	S3; Y7;	Replicate 1	Unambiguous	TNS3	NP_073585.8	64759	tensin-3	1	1	65288071	S3(Phospho); Y7(Phospho)	1	S(3): 100.0; Y(7): 100.0; S(18): 0.0	1				4204000		No Quan Values	Not					37	0.00601717	1	0	2	1099.48	2197.96	0.93	79.46	19852	19852	CAL27_CURCUMIN_pTy_R1.raw
1	LVGMDPEQASVTNQNEyAR	Y17;	Replicate 1	Unambiguous	ZDHHC20	NP_001273567.1	253832	probable palmitoyltransferase ZDHHC20 isoform 2	2	1	557786103	Y17(Phospho)	1	S(10): 0.0; T(12): 0.8; Y(17): 99.2	1	4487	1		4793000	Light	Excluded by Method	Not	100	1874000	5315		25	0.113077	0	0	2	1101.49	2201.96	4.34	58.11	14143	14143	CAL27_CURCUMIN_pTy_R1.raw
1	ESMCSTPAFPVSPETPyVK	Y17;	Replicate 1	Unambiguous	TNS3	NP_073585.8	64759	tensin-3	1	1	65288071	C4(Carbamidomethyl); Y17(Phospho)	1	S(2): 0.0; S(5): 0.0; T(6): 0.0; S(12): 0.0; T(15): 1.0; Y(17): 99.0	1	7998			46840000	Light	Redundant	Not	0.864	46220000	42430000		34	0.011714	0	61	2	1103.98	2206.94	0.3	79.74	19927	19927	CAL27_CURCUMIN_pTy_R1.raw
1	ESMCSTPAFPVSPETPyVK	Y17;	Replicate 1	Unambiguous	TNS3	NP_073585.8	64759	tensin-3	1	1	65288071	C4(Carbamidomethyl); Y17(Phospho)	1	S(2): 0.0; S(5): 0.0; T(6): 0.0; S(12): 0.0; T(15): 1.0; Y(17): 99.0	1	8039			20940000	Light	Redundant	Not	0.863	20730000	19050000		34	0.0104055	0	27	3	736.32	2206.95	0.79	80	19996	19996	CAL27_CURCUMIN_pTy_R1.raw
1	ESMCSTPAFPVSPETPyVK	Y17;	Replicate 1	Unambiguous	TNS3	NP_073585.8	64759	tensin-3	1	1	65288071	C4(Carbamidomethyl); Y17(Phospho); K19(Label:13C(6))	1	S(2): 0.0; S(5): 0.0; T(6): 0.0; S(12): 0.0; T(15): 1.0; Y(17): 99.0	1	7998			42430000	Heavy	Redundant	Not	0.864	46220000	42430000		41	0.00274078	0	0	2	1106.98	2212.96	-3.5	79.84	19955	19955	CAL27_CURCUMIN_pTy_R1.raw
1	ESMCSTPAFPVSPETPyVK	Y17;	Replicate 1	Unambiguous	TNS3	NP_073585.8	64759	tensin-3	1	1	65288071	C4(Carbamidomethyl); Y17(Phospho); K19(Label:13C(6))	1	S(2): 0.0; S(5): 0.0; T(6): 0.0; S(12): 0.0; T(15): 1.0; Y(17): 99.0	1	8039			19050000	Heavy	Redundant	Not	0.863	20730000	19050000		35	0.010704	0	3	3	738.326	2212.96	0.46	80.25	20063	20063	CAL27_CURCUMIN_pTy_R1.raw
1	ESMCSTPAFPVSPETPyVK	Y17;	Replicate 1	Unambiguous	TNS3	NP_073585.8	64759	tensin-3	1	1	65288071	C4(Carbamidomethyl); Y17(Phospho); K19(Label:13C(6))	1	S(2): 0.0; S(5): 0.0; T(6): 0.0; S(12): 0.0; T(15): 1.0; Y(17): 99.0	1	8086			11200000	Heavy	Redundant	Not	1.202	16970000	11200000		65	1.04828e-05	0	0	2	1106.99	2212.97	0.8	80.42	20107	20107	CAL27_CURCUMIN_pTy_R1.raw
1	MTTTSAAAyGTHLSPHVPHR	Y9;	Replicate 1	Unambiguous	ITGB4	NP_001005731.1	3691	integrin beta-4 isoform 3 precursor	3	1	54607033	Y9(Phospho)	1	T(2): 0.0; T(3): 0.0; T(4): 0.0; S(5): 0.0; Y(9): 99.2; T(11): 0.8; S(14): 0.0	1	3250			107800000	Light	Redundant	Not	2.292	102400000	35450000		33	0.0201233	0	48	4	554.508	2215.01	-1.15	50.56	12128	12128	CAL27_CURCUMIN_pTy_R1.raw
1	MTTTSAAAyGTHLSPHVPHR	Y9;	Replicate 1	Unambiguous	ITGB4	NP_001005731.1	3691	integrin beta-4 isoform 3 precursor	3	1	54607033	Y9(Phospho)	1	T(2): 0.0; T(3): 0.0; T(4): 0.0; S(5): 0.0; Y(9): 99.2; T(11): 0.8; S(14): 0.0	1	3250			107800000	Light	Redundant	Not	2.292	102400000	35450000		34	0.013493	0	17	4	554.508	2215.01	-0.27	51.2	12297	12297	CAL27_CURCUMIN_pTy_R1.raw
1	MTTTSAAAyGTHLSPHVPHR	Y9;	Replicate 1	Unambiguous	ITGB4	NP_001005731.1	3691	integrin beta-4 isoform 3 precursor	3	1	54607033	S14(Phospho)	1	T(2): 0.0; T(3): 0.0; T(4): 0.0; S(5): 0.0; Y(9): 99.2; T(11): 0.8; S(14): 0.0	1	3265			44140000	Light	Redundant	Not	2.412	44140000	14520000		29	0.0428027	0	16	3	739.01	2215.01	1.14	51.31	12327	12327	CAL27_CURCUMIN_pTy_R1.raw
1	QAWFIENEEQEyVQTVK	Y12;	Replicate 1	Unambiguous	ANXA1	NP_000691.1	301	annexin A1	1	1	4502101	Y12(Phospho)	1	Y(12): 100.0; T(15): 0.0	1	9320			18930000	Light	Redundant	Not	3.275	17150000	4155000		54	0.000142961	0	0	2	1111	2220.99	1.84	88.42	22239	22239	CAL27_CURCUMIN_pTy_R1.raw
1	ESMCSTPAFPVSPETPyVK	Y17;	Replicate 1	Unambiguous	TNS3	NP_073585.8	64759	tensin-3	1	1	65288071	M3(Oxidation); C4(Carbamidomethyl); Y17(Phospho); K19(Label:13C(6))	1	S(2): 0.0; S(5): 0.0; T(6): 0.0; S(12): 0.0; T(15): 1.0; Y(17): 99.0	1	7116			897500	Heavy	Redundant	Not	1.962	2219000	897500		44	0.00123534	0	61	2	1114.98	2228.95	-1.96	74.02	18401	18401	CAL27_CURCUMIN_pTy_R1.raw
1	GPVSGTEPEPVySMEAADYR	Y12;	Replicate 1	Unambiguous	CTTN	NP_612632.1	2017	src substrate cortactin isoform b	3	1	20357556	Y12(Phospho)	1	S(4): 0.0; T(6): 0.0; Y(12): 99.5; S(13): 0.5; Y(19): 0.0	1	7048			8449000	Light	Redundant	Not	2.24	8304000	2942000		68	4.47458e-06	0	23	3	745.648	2234.93	-0.71	73.63	18296	18296	CAL27_CURCUMIN_pTy_R1.raw
1	GPVSGTEPEPVySMEAADYR	Y12;	Replicate 1	Unambiguous	CTTN	NP_612632.1	2017	src substrate cortactin isoform b	3	1	20357556	Y19(Phospho)	1	S(4): 0.0; T(6): 0.0; Y(12): 99.5; S(13): 0.5; Y(19): 0.0	1	6493		1	675200	Light	Excluded by Method	Not	6.10254	266200	34620		35	0.00814344	0	41	3	745.649	2234.93	-0.14	70.18	17371	17371	CAL27_CURCUMIN_pTy_R1.raw
1	GPVSGTEPEPVySMEAADYR	Y12;	Replicate 1	Unambiguous	CTTN	NP_612632.1	2017	src substrate cortactin isoform b	3	1	20357556	Y12(Phospho)	1	S(4): 0.0; T(6): 0.0; Y(12): 99.5; S(13): 0.5; Y(19): 0.0	1	7130			12650000	Light	Redundant	Not	1.967	12650000	5103000		49	0.000333135	0	0	2	1117.97	2234.93	0.3	74.07	18414	18414	CAL27_CURCUMIN_pTy_R1.raw
1	GPVSGTEPEPVySMEAADYR	Y12;	Replicate 1	Unambiguous	CTTN	NP_612632.1	2017	src substrate cortactin isoform b	3	1	20357556	Y12(Phospho)	1	S(4): 0.0; T(6): 0.0; Y(12): 99.5; S(13): 0.5; Y(19): 0.0	1	6950	1		1851000	Light	Excluded by Method	Not	100	702500	5315		26	0.0677048	0	21	3	745.649	2234.93	0.35	73.05	18139	18139	CAL27_CURCUMIN_pTy_R1.raw
1	GPVSGTEPEPVySMEAADYR	Y12;	Replicate 1	Unambiguous	CTTN	NP_612632.1	2017	src substrate cortactin isoform b	3	1	20357556	Y12(Phospho)	1	S(4): 0.0; T(6): 0.0; Y(12): 99.5; S(13): 0.5; Y(19): 0.0	1	7025			21600000	Light	Redundant	Not	1.909	21600000	8978000		63	1.24672e-05	0	8	2	1117.97	2234.93	0.74	73.51	18262	18262	CAL27_CURCUMIN_pTy_R1.raw
1	GPVSGTEPEPVySMEAADYR	Y12;	Replicate 1	Unambiguous	CTTN	NP_612632.1	2017	src substrate cortactin isoform b	3	1	20357556	Y12(Phospho)	1	S(4): 0.0; T(6): 0.0; Y(12): 99.5; S(13): 0.5; Y(19): 0.0	1	6933			6924000	Light	Redundant	Not	2.257	6924000	2434000		33	0.0131798	0	0	2	1117.97	2234.93	1.07	72.94	18109	18109	CAL27_CURCUMIN_pTy_R1.raw
1	GPVSGTEPEPVySMEAADYR	Y12;	Replicate 1	Unambiguous	CTTN	NP_612632.1	2017	src substrate cortactin isoform b	3	1	20357556	Y19(Phospho)	1	S(4): 0.0; T(6): 0.0; Y(12): 99.5; S(13): 0.5; Y(19): 0.0	1				474900		No Quan Values	Not					27	0.0578724	0	0	2	1117.97	2234.94	2.05	70.01	17327	17327	CAL27_CURCUMIN_pTy_R1.raw
1	yKPMMIITEYMENGALDK	Y1;	Replicate 1	Unambiguous	EPHA2	NP_004422.2	1969	ephrin type-A receptor 2 precursor	1	1	32967311	Y1(Phospho); K2(Label:13C(6)); K18(Label:13C(6))	1	Y(1): 100.0; T(8): 0.0; Y(10): 0.0	1	13871		1	1303000	Heavy	Excluded by Method	Not	0.403647	662700	1303000		29	0.0408124	0	14	3	747.015	2239.03	0.41	116.38	29744	29744	CAL27_CURCUMIN_pTy_R1.raw
1	yKPMMIITEYMENGALDK	Y1;	Replicate 1	Unambiguous	EPHA2	NP_004422.2	1969	ephrin type-A receptor 2 precursor	1	1	32967311	K2(Label:13C(6)); Y10(Phospho); K18(Label:13C(6))	1	Y(1): 100.0; T(8): 0.0; Y(10): 0.0	1				23320000		No Quan Values	Not					45	0.00115463	0	47	3	747.015	2239.03	1.31	107.01	27231	27231	CAL27_CURCUMIN_pTy_R1.raw
1	GPVSGTEPEPVySMEAADYR	Y12;	Replicate 1	Unambiguous	CTTN	NP_612632.1	2017	src substrate cortactin isoform b	3	1	20357556	Y12(Phospho); R20(Label:13C(6))	1	S(4): 0.0; T(6): 0.0; Y(12): 99.5; S(13): 0.5; Y(19): 0.0	1	7025			8978000	Heavy	Redundant	Not	1.909	21600000	8978000		54	0.00013588	0	4	2	1120.98	2240.95	0.69	73.83	18350	18350	CAL27_CURCUMIN_pTy_R1.raw
1	QQQMVVAHQySFAPDGEAR	Y10;	Replicate 1	Unambiguous	TNS3	NP_073585.8	64759	tensin-3	1	1	65288071	Y10(Phospho)	1	Y(10): 100.0; S(11): 0.0	1	4222			12620000	Light	Redundant	Not	1.212	11600000	7597000		41	0.00223022	0	19	3	747.996	2241.97	-0.06	56.51	13719	13719	CAL27_CURCUMIN_pTy_R1.raw
1	VLEDDPEATyTTSGGKIPIR	Y10;	Replicate 1	Unambiguous	EPHA2	NP_004422.2	1969	ephrin type-A receptor 2 precursor	1	1	32967311	Y10(Phospho)	1	T(9): 0.6; Y(10): 98.7; T(11): 0.6; T(12): 0.0; S(13): 0.0	1	4978			44080000	Light	Redundant	Not	1.707	44080000	20490000		61	2.26671e-05	1	0	2	1121.53	2242.06	-0.75	60.98	14907	14907	CAL27_CURCUMIN_pTy_R1.raw
1	VLEDDPEATyTTSGGKIPIR	Y10;	Replicate 1	Unambiguous	EPHA2	NP_004422.2	1969	ephrin type-A receptor 2 precursor	1	1	32967311	Y10(Phospho)	1	T(9): 0.6; Y(10): 98.7; T(11): 0.6; T(12): 0.0; S(13): 0.0	1	4990			386300000	Light	Redundant	Not	1.67	383400000	182200000		51	0.000213053	1	11	3	748.026	2242.06	0.17	61.04	14924	14924	CAL27_CURCUMIN_pTy_R1.raw
1	VLEDDPEATyTTSGGKIPIR	Y10;	Replicate 1	Unambiguous	EPHA2	NP_004422.2	1969	ephrin type-A receptor 2 precursor	1	1	32967311	Y10(Phospho)	1	T(9): 0.6; Y(10): 98.7; T(11): 0.6; T(12): 0.0; S(13): 0.0	1	4990			386300000	Light	Redundant	Not	1.67	383400000	182200000		47	0.000602594	1	17	3	748.026	2242.06	0.25	61.66	15090	15090	CAL27_CURCUMIN_pTy_R1.raw
1	EILVGDVGQTVDDPyATFVK	Y15;	Replicate 1	Unambiguous	CFL1	NP_005498.1	1072	cofilin-1	1	1	5031635	Y15(Phospho)	1	T(10): 0.0; Y(15): 99.3; T(17): 0.7	1	10432			263900000	Light	Redundant	Not	3.693	263900000	56690000		50	0.000310406	0	3	3	749.36	2246.06	0.45	95.98	24267	24267	CAL27_CURCUMIN_pTy_R1.raw
1	EILVGDVGQTVDDPyATFVK	Y15;	Replicate 1	Unambiguous	CFL1	NP_005498.1	1072	cofilin-1	1	1	5031635	Y15(Phospho)	1	T(10): 0.0; Y(15): 99.3; T(17): 0.7	1	10432			263900000	Light	Redundant	Not	3.693	263900000	56690000		37	0.00604242	0	15	3	749.36	2246.07	1.02	95.36	24101	24101	CAL27_CURCUMIN_pTy_R1.raw
1	EILVGDVGQTVDDPyATFVK	Y15;	Replicate 1	Unambiguous	CFL1	NP_005498.1	1072	cofilin-1	1	1	5031635	Y15(Phospho)	1	T(10): 0.0; Y(15): 99.3; T(17): 0.7	1	10422			706400000	Light	Redundant	Not	3.701	673600000	144400000		68	4.95681e-06	0	4	2	1123.54	2246.07	1.57	95.97	24266	24266	CAL27_CURCUMIN_pTy_R1.raw
1	EILVGDVGQTVDDPyATFVK	Y15;	Replicate 1	Unambiguous	CFL1	NP_005498.1	1072	cofilin-1	1	1	5031635	Y15(Phospho)	1	T(10): 0.0; Y(15): 99.3; T(17): 0.7	1	10422			706400000	Light	Redundant	Not	3.701	673600000	144400000		72	1.9373e-06	0	19	2	1123.54	2246.07	2.66	95.35	24097	24097	CAL27_CURCUMIN_pTy_R1.raw
2	IADPEHDHTGFLtEyVATR	T13; Y15;	Replicate 1	Unambiguous	MAPK3	NP_001103361.1	5595	mitogen-activated protein kinase 3 isoform 3	3	1	158138507	Y15(Phospho)	1	T(9): 0.0; T(13): 100.0; Y(15): 100.0; T(18): 0.0	1						No Quan Values	Not					46	0.000807709	0	0	3	751.338	2252	-1.13	68.23	16849	16849	CAL27_CURCUMIN_pTy_R1.raw
2	IADPEHDHTGFLtEyVATR	T13; Y15;	Replicate 1	Unambiguous	MAPK3	NP_001103361.1	5595	mitogen-activated protein kinase 3 isoform 3	3	1	158138507	Y15(Phospho)	1	T(9): 0.0; T(13): 100.0; Y(15): 100.0; T(18): 0.0	1						No Quan Values	Not					81	2.00421e-07	0	0	3	751.34	2252.01	2.04	67.64	16692	16692	CAL27_CURCUMIN_pTy_R1.raw
1	EILVGDVGQTVDDPyATFVK	Y15;	Replicate 1	Unambiguous	CFL1	NP_005498.1	1072	cofilin-1	1	1	5031635	T17(Phospho); K20(Label:13C(6))	1	T(10): 0.0; Y(15): 99.3; T(17): 0.7	1	10432			56690000	Heavy	Redundant	Not	3.693	263900000	56690000		35	0.00692014	0	12	3	751.367	2252.09	1.19	95.64	24175	24175	CAL27_CURCUMIN_pTy_R1.raw
1	VLEDDPEATyTTSGGKIPIR	Y10;	Replicate 1	Unambiguous	EPHA2	NP_004422.2	1969	ephrin type-A receptor 2 precursor	1	1	32967311	Y10(Phospho); K16(Label:13C(6)); R20(Label:13C(6))	1	T(9): 0.6; Y(10): 98.7; T(11): 0.6; T(12): 0.0; S(13): 0.0	1	4990			182200000	Heavy	Redundant	Not	1.67	383400000	182200000		47	0.000423579	1	30	3	752.039	2254.1	-0.31	61.05	14927	14927	CAL27_CURCUMIN_pTy_R1.raw
1	VLEDDPEATyTTSGGKIPIR	Y10;	Replicate 1	Unambiguous	EPHA2	NP_004422.2	1969	ephrin type-A receptor 2 precursor	1	1	32967311	Y10(Phospho); K16(Label:13C(6)); R20(Label:13C(6))	1	T(9): 0.6; Y(10): 98.7; T(11): 0.6; T(12): 0.0; S(13): 0.0	1	4978			20490000	Heavy	Redundant	Not	1.707	44080000	20490000		46	0.000657149	1	13	2	1127.56	2254.1	0.02	61.19	14965	14965	CAL27_CURCUMIN_pTy_R1.raw
1	VLEDDPEATyTTSGGKIPIR	Y10;	Replicate 1	Unambiguous	EPHA2	NP_004422.2	1969	ephrin type-A receptor 2 precursor	1	1	32967311	Y10(Phospho); K16(Label:13C(6)); R20(Label:13C(6))	1	T(9): 0.6; Y(10): 98.7; T(11): 0.6; T(12): 0.0; S(13): 0.0	1	4990			182200000	Heavy	Redundant	Not	1.67	383400000	182200000		59	3.14787e-05	1	10	3	752.04	2254.11	0.99	61.67	15092	15092	CAL27_CURCUMIN_pTy_R1.raw
2	IADPEHDHTGFLtEyVATR	T13; Y15;	Replicate 1	Unambiguous	MAPK3	NP_001103361.1	5595	mitogen-activated protein kinase 3 isoform 3	3	1	158138507	Y15(Phospho); R19(Label:13C(6))	1	T(9): 0.0; T(13): 100.0; Y(15): 100.0; T(18): 0.0	1	6016	1		540500000	Heavy	Excluded by Method	Not	0.01	5315	175900000		65	9.71777e-06	0	2	3	753.346	2258.02	0.5	68.05	16800	16800	CAL27_CURCUMIN_pTy_R1.raw
2	IADPEHDHTGFLtEyVATR	T13; Y15;	Replicate 1	Unambiguous	MAPK3	NP_001103361.1	5595	mitogen-activated protein kinase 3 isoform 3	3	1	158138507	Y15(Phospho); R19(Label:13C(6))	1	T(9): 0.0; T(13): 100.0; Y(15): 100.0; T(18): 0.0	1	6016	1		540500000	Heavy	Excluded by Method	Not	0.01	5315	175900000		69	3.92916e-06	0	20	3	753.346	2258.02	0.99	67.14	16557	16557	CAL27_CURCUMIN_pTy_R1.raw
1	VSSTHyYLLPERPPYLDK	Y6;	Replicate 1	Unambiguous	ERRFI1	NP_061821.1	54206	ERBB receptor feedback inhibitor 1	1	1	10047086	Y7(Phospho)	1	S(2): 0.0; S(3): 0.9; T(4): 0.0; Y(6): 98.3; Y(7): 0.9; Y(15): 0.0	1	8281			5833000	Light	Redundant	Not	2.925	5833000	1582000		24	0.0993264	0	6	3	753.368	2258.09	0.34	81.59	20422	20422	CAL27_CURCUMIN_pTy_R1.raw
1	yAGSALQYEDVSTAVQNLQK	Y1;	Replicate 1	Unambiguous	VTA1	NP_001273301.1	51534	vacuolar protein sorting-associated protein VTA1 homolog isoform c	3	1	556503347	S4(Phospho)	1	Y(1): 99.4; S(4): 0.6; Y(8): 0.0; S(12): 0.0; T(13): 0.0	1	9752			12000000	Light	Redundant	Not	3.698	8216000	1763000		89	4.0596e-08	0	24	2	1133.03	2265.05	1.38	91.26	23001	23001	CAL27_CURCUMIN_pTy_R1.raw
1	ERPALNAQGGIyVINPEMGR	Y12;	Replicate 1	Unambiguous	MFAP3	NP_001128509.1	4238	microfibril-associated glycoprotein 3 isoform 2	2	1	205277369	Y12(Phospho)	1	Y(12): 100.0	1	7866	1		1395000	Light	Unique	Used	62.937	421500	5315		28	0.0535987	0	66	3	755.699	2265.08	-1.27	78.87	19694	19694	CAL27_CURCUMIN_pTy_R1.raw
1	SSSSDEEYIyMNKVTINK	Y10;	Replicate 1	Unambiguous	AFAP1L2	NP_115939.1	84632	actin filament-associated protein 1-like 2 isoform 2	3	1	24308338	Y8(Phospho); Y10(Phospho)	1	S(1): 20.5; S(2): 20.5; S(3): 20.5; S(4): 20.5; Y(8): 20.5; Y(10): 97.3; T(15): 0.0	1	5188			616700	Light	Unique	Used	0.804	616700	608700		25	0.0648436	1	0	2	1134.46	2267.92	1.21	62.27	15251	15251	CAL27_CURCUMIN_pTy_R1.raw
1	YStLHTQSAEPPPPPEPARI	T3;	Replicate 1	Unambiguous	CD99L2	NP_001171737.1	83692	CD99 antigen-like protein 2 isoform 4 precursor	5	1	296317276	T3(Phospho)	1	Y(1): 0.7; S(2): 0.7; T(3): 97.8; T(6): 0.7; S(8): 0.0	1	4878			43340000	Light	Redundant	Not	8.178	38300000	3716000		25	0.0995049	1	7	3	756.695	2268.07	0.57	60.43	14761	14761	CAL27_CURCUMIN_pTy_R1.raw
2	AATSGVPSIyAPStYAHLSPAK	Y10; T14;	Replicate 1	Unambiguous	LSR	NP_001247419.1	51599	lipolysis-stimulated lipoprotein receptor isoform 5	5	1	386781463	Y15(Phospho)	1	T(3): 0.0; S(4): 0.0; S(8): 0.0; Y(10): 100.0; S(13): 1.2; T(14): 97.6; Y(15): 1.2; S(19): 0.0	1	6587			29470000	Light	Redundant	Not	2.406	29090000	9595000		43	0.0010755	0	0	3	757.035	2269.09	0.35	70.81	17539	17539	CAL27_CURCUMIN_pTy_R1.raw
1	NMGGPyGGGNYGPGGSGGSGGYGGR	Y6;	Replicate 1	Unambiguous	HNRNPA2B1	NP_112533.1	3181	heterogeneous nuclear ribonucleoproteins A2/B1 isoform B1	2	1	14043072	Y6(Phospho)	1	Y(6): 99.5; Y(11): 0.5; S(16): 0.0; S(19): 0.0; Y(22): 0.0	1	2489		1	21450000	Light	Excluded by Method	Not	11.2298	7229000	510900		33	0.00966663	0	9	3	757.296	2269.87	0.68	46.24	10965	10965	CAL27_CURCUMIN_pTy_R1.raw
1	NMGGPyGGGNYGPGGSGGSGGYGGR	Y6;	Replicate 1	Unambiguous	HNRNPA2B1	NP_112533.1	3181	heterogeneous nuclear ribonucleoproteins A2/B1 isoform B1	2	1	14043072	Y11(Phospho)	1	Y(6): 99.5; Y(11): 0.5; S(16): 0.0; S(19): 0.0; Y(22): 0.0	1	2966			15440000	Light	Redundant	Not	15.224	10330000	538200		68	3.0563e-06	0	0	2	1135.44	2269.87	0.9	48.76	11642	11642	CAL27_CURCUMIN_pTy_R1.raw
1	NMGGPyGGGNYGPGGSGGSGGYGGR	Y6;	Replicate 1	Unambiguous	HNRNPA2B1	NP_112533.1	3181	heterogeneous nuclear ribonucleoproteins A2/B1 isoform B1	2	1	14043072	Y6(Phospho)	1	Y(6): 99.5; Y(11): 0.5; S(16): 0.0; S(19): 0.0; Y(22): 0.0	1	2489		1	21450000	Light	Excluded by Method	Not	11.2298	7229000	510900		26	0.0552022	0	29	3	757.296	2269.87	1.08	45.68	10817	10817	CAL27_CURCUMIN_pTy_R1.raw
1	NMGGPyGGGNYGPGGSGGSGGYGGR	Y6;	Replicate 1	Unambiguous	HNRNPA2B1	NP_112533.1	3181	heterogeneous nuclear ribonucleoproteins A2/B1 isoform B1	2	1	14043072	Y6(Phospho)	1	Y(6): 99.5; Y(11): 0.5; S(16): 0.0; S(19): 0.0; Y(22): 0.0	1	2486			23670000	Light	Redundant	Not	9.095	15800000	1378000		123	1.07884e-11	0	0	2	1135.44	2269.87	1.33	46.23	10964	10964	CAL27_CURCUMIN_pTy_R1.raw
1	NMGGPyGGGNYGPGGSGGSGGYGGR	Y6;	Replicate 1	Unambiguous	HNRNPA2B1	NP_112533.1	3181	heterogeneous nuclear ribonucleoproteins A2/B1 isoform B1	2	1	14043072	Y6(Phospho)	1	Y(6): 99.5; Y(11): 0.5; S(16): 0.0; S(19): 0.0; Y(22): 0.0	1	2486			23670000	Light	Redundant	Not	9.095	15800000	1378000		64	8.18383e-06	0	0	2	1135.44	2269.88	1.54	45.65	10809	10809	CAL27_CURCUMIN_pTy_R1.raw
1	GLLPSQYGQEVyDTPPMAVK	Y12;	Replicate 1	Unambiguous	BCAR1	NP_001164190.1	9564	breast cancer anti-estrogen resistance protein 1 isoform 7	9	1	282398123	Y12(Phospho)	1	S(5): 0.0; Y(7): 0.0; Y(12): 100.0; T(14): 0.0	1	9600			13220000	Light	Unique	Used	1.11	8254000	5903000		35	0.010023	0	24	2	1137.03	2273.05	-1.22	90.27	22734	22734	CAL27_CURCUMIN_pTy_R1.raw
1	GLLPSQYGQEVyDTPPMAVK	Y12;	Replicate 1	Unambiguous	BCAR1	NP_001164190.1	9564	breast cancer anti-estrogen resistance protein 1 isoform 7	9	1	282398123	Y12(Phospho)	1	S(5): 0.0; Y(7): 0.0; Y(12): 100.0; T(14): 0.0	1	9628			11150000	Light	Redundant	Not	1.081	11150000	8187000		25	0.0927012	0	31	3	758.357	2273.06	0.41	90.47	22789	22789	CAL27_CURCUMIN_pTy_R1.raw
1	NMGGPyGGGNYGPGGSGGSGGYGGR	Y6;	Replicate 1	Unambiguous	HNRNPA2B1	NP_112533.1	3181	heterogeneous nuclear ribonucleoproteins A2/B1 isoform B1	2	1	14043072	Y6(Phospho); R25(Label:13C(6))	1	Y(6): 99.5; Y(11): 0.5; S(16): 0.0; S(19): 0.0; Y(22): 0.0	1	2486			1378000	Heavy	Unique	Used	9.095	15800000	1378000		37	0.00445612	0	23	2	1138.45	2275.89	1.17	46	10901	10901	CAL27_CURCUMIN_pTy_R1.raw
1	NMGGPyGGGNYGPGGSGGSGGYGGR	Y6;	Replicate 1	Unambiguous	HNRNPA2B1	NP_112533.1	3181	heterogeneous nuclear ribonucleoproteins A2/B1 isoform B1	2	1	14043072	M2(Oxidation); Y11(Phospho)	1	Y(6): 99.5; Y(11): 0.5; S(16): 0.0; S(19): 0.0; Y(22): 0.0	1				86780		No Quan Values	Not					54	8.56952e-05	0	27	3	762.626	2285.86	-1.3	45.93	10884	10884	CAL27_CURCUMIN_pTy_R1.raw
1	TLEPVKPPTVPNDyMTSPAR	Y14;	Replicate 1	Unambiguous	ABI1	NP_001171596.1	10006	abl interactor 1 isoform l	12	1	296011003	Y14(Phospho)	1	T(1): 0.0; T(9): 0.0; Y(14): 99.1; T(16): 0.8; S(17): 0.0	1	6495			9804000	Light	Redundant	Not	2.891	8377000	2300000		27	0.0692372	0	18	3	765.036	2293.09	-0.09	70.19	17374	17374	CAL27_CURCUMIN_pTy_R1.raw
1	QPAPKPEPSFSEyASVQVPR	Y13;	Replicate 1	Unambiguous	SIRPA	NP_001035112.1	140885	tyrosine-protein phosphatase non-receptor type substrate 1 precursor	1	1	91105767	Y13(Phospho)	1	S(9): 1.3; S(11): 1.3; Y(13): 97.5; S(15): 0.0	1	5988		1	815300	Light	Excluded by Method	Not	0.305075	815300	2121000		41	0.00246546	0	0	3	765.366	2294.08	-0.81	66.98	16514	16514	CAL27_CURCUMIN_pTy_R1.raw
1	VPSVELTNLYPyCDYEMK	Y12;	Replicate 1	Unambiguous	ITGB4	NP_001005731.1	3691	integrin beta-4 isoform 3 precursor	3	1	54607033	Y12(Phospho); C13(Carbamidomethyl)	1	S(3): 0.0; T(7): 0.0; Y(10): 0.7; Y(12): 99.3; Y(15): 0.0	1	10830			5404000	Light	Redundant	Not	1.176	3980000	2686000		27	0.0548056	0	23	2	1151	2300.99	-0.07	97.86	24772	24772	CAL27_CURCUMIN_pTy_R1.raw
1	MREDyDSVEQDGDEPGPQR	Y5;	Replicate 1	Unambiguous	RBM8A	NP_005096.1	9939	RNA-binding protein 8A	1	1	4826972	Y5(Phospho)	1	Y(5): 99.1; S(7): 0.9	1	1690	1		3018000	Light	Excluded by Method	Not	100	1186000	5315		28	0.0371557	1	53	3	768.302	2302.89	0.11	40.41	9397	9397	CAL27_CURCUMIN_pTy_R1.raw
1	AQQGLyQVPGPSPQFQSPPAK	Y6;	Replicate 1	Unambiguous	BCAR1	NP_001164190.1	9564	breast cancer anti-estrogen resistance protein 1 isoform 7	7	1	282398123	Y6(Phospho)	1	Y(6): 100.0; S(12): 0.0; S(17): 0.0	1	5495			97660000	Light	Redundant	Not	1.402	96020000	54340000		50	0.000320903	0	8	3	769.038	2305.1	-0.56	64.05	15728	15728	CAL27_CURCUMIN_pTy_R1.raw
1	AQQGLyQVPGPSPQFQSPPAK	Y6;	Replicate 1	Unambiguous	BCAR1	NP_001164190.1	9564	breast cancer anti-estrogen resistance protein 1 isoform 7	7	1	282398123	Y6(Phospho)	1	Y(6): 100.0; S(12): 0.0; S(17): 0.0	1	5581			108700000	Light	Redundant	Not	1.4	106700000	60480000		68	4.85693e-06	0	1	3	769.039	2305.1	0.79	64.59	15874	15874	CAL27_CURCUMIN_pTy_R1.raw
1	TLEPVKPPTVPNDyMTSPAR	Y14;	Replicate 1	Unambiguous	ABI1	NP_001171596.1	10006	abl interactor 1 isoform l	12	1	296011003	K6(Label:13C(6)); Y14(Phospho); R20(Label:13C(6))	1	T(1): 0.0; T(9): 0.0; Y(14): 99.1; T(16): 0.8; S(17): 0.0	1	6495			2300000	Heavy	Redundant	Not	2.891	8377000	2300000		24	0.10913	0	20	3	769.051	2305.14	1.51	70.27	17395	17395	CAL27_CURCUMIN_pTy_R1.raw
1	QPAPKPEPSFSEyASVQVPR	Y13;	Replicate 1	Unambiguous	SIRPA	NP_001035112.1	140885	tyrosine-protein phosphatase non-receptor type substrate 1 precursor	1	1	91105767	K5(Label:13C(6)); Y13(Phospho); R20(Label:13C(6))	1	S(9): 1.3; S(11): 1.3; Y(13): 97.5; S(15): 0.0	1	6011		1	10970000	Heavy	Excluded by Method	Not	0.299686	1595000	4224000		38	0.00373003	0	41	3	769.382	2306.13	1.99	67.12	16551	16551	CAL27_CURCUMIN_pTy_R1.raw
1	VPSVELTNLYPyCDYEMK	Y12;	Replicate 1	Unambiguous	ITGB4	NP_001005731.1	3691	integrin beta-4 isoform 3 precursor	3	1	54607033	Y12(Phospho); C13(Carbamidomethyl); K18(Label:13C(6))	1	S(3): 0.0; T(7): 0.0; Y(10): 0.7; Y(12): 99.3; Y(15): 0.0	1	10716		1	828900	Heavy	Excluded by Method	Not	4.44556	4643000	828900		64	1.40102e-05	0	8	2	1154.01	2307.01	3.69	97.22	24600	24600	CAL27_CURCUMIN_pTy_R1.raw
1	RPHtPTPGIYMGRPTYGSSR	T4;	Replicate 1	Unambiguous	TRA2B	NP_001230808.1	6434	transformer-2 protein homolog beta isoform 2	2	1	345197228	T4(Phospho)	1	T(4): 100.0; T(6): 0.0; Y(10): 0.0; T(15): 0.0; Y(16): 0.0; S(18): 0.0; S(19): 0.0	1	3540			10370000	Light	Redundant	Not	1.496	10370000	5501000		27	0.0689517	0	25	4	578.526	2311.08	0.2	52.41	12622	12622	CAL27_CURCUMIN_pTy_R1.raw
1	AQQGLyQVPGPSPQFQSPPAK	Y6;	Replicate 1	Unambiguous	BCAR1	NP_001164190.1	9564	breast cancer anti-estrogen resistance protein 1 isoform 7	7	1	282398123	Y6(Phospho); K21(Label:13C(6))	1	Y(6): 100.0; S(12): 0.0; S(17): 0.0	1	5581			60480000	Heavy	Redundant	Not	1.4	106700000	60480000		45	0.000889064	0	3	3	771.045	2311.12	-0.08	64.6	15875	15875	CAL27_CURCUMIN_pTy_R1.raw
1	AQQGLyQVPGPSPQFQSPPAK	Y6;	Replicate 1	Unambiguous	BCAR1	NP_001164190.1	9564	breast cancer anti-estrogen resistance protein 1 isoform 7	7	1	282398123	Y6(Phospho); K21(Label:13C(6))	1	Y(6): 100.0; S(12): 0.0; S(17): 0.0	1	5495			54340000	Heavy	Redundant	Not	1.402	96020000	54340000		43	0.00141683	0	0	3	771.046	2311.12	0.4	64.07	15733	15733	CAL27_CURCUMIN_pTy_R1.raw
1	GSHQISLDNPDyQQDFFPK	Y12;	Replicate 1	Unambiguous	EGFR	NP_005219.2	1956	epidermal growth factor receptor isoform a precursor	1	1	29725609	Y12(Phospho)	1	S(2): 0.0; S(6): 0.0; Y(12): 100.0	1	8615			196000000	Light	Redundant	Not	2.235	193400000	68690000		55	7.37622e-05	0	1	3	772.67	2316	-0.19	83.97	21043	21043	CAL27_CURCUMIN_pTy_R1.raw
1	GSHQISLDNPDyQQDFFPK	Y12;	Replicate 1	Unambiguous	EGFR	NP_005219.2	1956	epidermal growth factor receptor isoform a precursor	1	1	29725609	Y12(Phospho)	1	S(2): 0.0; S(6): 0.0; Y(12): 100.0	1	8528	1		6663000	Light	Excluded by Method	Not	100	2606000	5315		71	2.19772e-06	0	74	2	1158.5	2316	1.24	83.28	20864	20864	CAL27_CURCUMIN_pTy_R1.raw
1	GSHQISLDNPDyQQDFFPK	Y12;	Replicate 1	Unambiguous	EGFR	NP_005219.2	1956	epidermal growth factor receptor isoform a precursor	1	1	29725609	Y12(Phospho)	1	S(2): 0.0; S(6): 0.0; Y(12): 100.0	1	8608			24710000	Light	Redundant	Not	2.591	24600000	7533000		93	1.50853e-08	0	5	2	1158.5	2316	2.29	83.9	21025	21025	CAL27_CURCUMIN_pTy_R1.raw
1	GIRPFPSEETTENDDDVyR	Y18;	Replicate 1	Unambiguous	VAV2	NP_003362.2	7410	guanine nucleotide exchange factor VAV2 isoform 2	2	1	40549448	Y18(Phospho)	1	S(7): 0.0; T(10): 0.0; T(11): 0.0; Y(18): 100.0	1	4511		1	37480000	Light	Excluded by Method	Not	3.6921	11030000	2371000		51	0.00024564	0	16	3	773.996	2319.97	-1.01	58.24	14177	14177	CAL27_CURCUMIN_pTy_R1.raw
1	GIRPFPSEETTENDDDVyR	Y18;	Replicate 1	Unambiguous	VAV2	NP_003362.2	7410	guanine nucleotide exchange factor VAV2 isoform 2	2	1	40549448	Y18(Phospho)	1	S(7): 0.0; T(10): 0.0; T(11): 0.0; Y(18): 100.0	1	4511		1	37480000	Light	Excluded by Method	Not	3.6921	11030000	2371000		23	0.139172	0	21	3	773.998	2319.98	0.65	58.8	14327	14327	CAL27_CURCUMIN_pTy_R1.raw
1	GSHQISLDNPDyQQDFFPK	Y12;	Replicate 1	Unambiguous	EGFR	NP_005219.2	1956	epidermal growth factor receptor isoform a precursor	1	1	29725609	Y12(Phospho); K19(Label:13C(6))	1	S(2): 0.0; S(6): 0.0; Y(12): 100.0	1	8608			7533000	Heavy	Redundant	Not	2.591	24600000	7533000		61	2.08593e-05	0	0	2	1161.51	2322.01	-0.92	83.77	20991	20991	CAL27_CURCUMIN_pTy_R1.raw
1	GSHQISLDNPDyQQDFFPK	Y12;	Replicate 1	Unambiguous	EGFR	NP_005219.2	1956	epidermal growth factor receptor isoform a precursor	1	1	29725609	Y12(Phospho); K19(Label:13C(6))	1	S(2): 0.0; S(6): 0.0; Y(12): 100.0	1	8498			29260000	Heavy	Redundant	Not	2.137	78800000	29260000		47	0.000607532	0	19	3	774.677	2322.02	0.21	83.09	20813	20813	CAL27_CURCUMIN_pTy_R1.raw
1	GSHQISLDNPDyQQDFFPK	Y12;	Replicate 1	Unambiguous	EGFR	NP_005219.2	1956	epidermal growth factor receptor isoform a precursor	1	1	29725609	Y12(Phospho); K19(Label:13C(6))	1	S(2): 0.0; S(6): 0.0; Y(12): 100.0	1	8615			68690000	Heavy	Redundant	Not	2.235	193400000	68690000		54	0.000120825	0	4	3	774.678	2322.02	0.44	83.82	21003	21003	CAL27_CURCUMIN_pTy_R1.raw
2	IADPEHDHTGFLtEyVATR	T13; Y15;	Replicate 1	Unambiguous	MAPK3	NP_001103361.1	5595	mitogen-activated protein kinase 3 isoform 3	3	1	158138507	T13(Phospho); Y15(Phospho); R19(Label:13C(6))	1	T(9): 0.0; T(13): 100.0; Y(15): 100.0; T(18): 0.0	1	6589			50450000	Heavy	Redundant	Not	0.459	29160000	50450000		37	0.00563855	0	5	3	780.002	2337.99	0.97	71.31	17673	17673	CAL27_CURCUMIN_pTy_R1.raw
2	AATSGVPSIyAPStYAHLSPAK	Y10; T14;	Replicate 1	Unambiguous	LSR	NP_001247419.1	51599	lipolysis-stimulated lipoprotein receptor isoform 5	5	1	386781463	Y10(Phospho); Y15(Phospho)	1	T(3): 0.0; S(4): 0.0; S(8): 0.0; Y(10): 100.0; S(13): 1.2; T(14): 97.6; Y(15): 1.2; S(19): 0.0	1	6030			56480000	Light	Redundant	Not	13	49460000	3019000		28	0.043113	0	16	3	783.691	2349.06	0.51	67.22	16579	16579	CAL27_CURCUMIN_pTy_R1.raw
1	NYGGVyVGLPSEAVNMVSSQTK	Y6;	Replicate 1	Unambiguous	C12orf75	NP_001138671.1	387882	overexpressed in colon carcinoma 1 protein	1	1	223633952	Y6(Phospho)	1	Y(2): 1.0; Y(6): 99.0; S(11): 0.0; S(18): 0.0; S(19): 0.0; T(21): 0.0	1	11751	1		5726000	Light	Excluded by Method	Not	100	1976000	5315		40	0.00288244	0	37	3	794.034	2380.09	-0.33	103.4	26261	26261	CAL27_CURCUMIN_pTy_R1.raw
1	THYPAQQGEYQTHQPVyHK	Y17;	Replicate 1	Unambiguous	BAG3	NP_004272.2	9531	BAG family molecular chaperone regulator 3	1	1	14043024	Y17(Phospho)	1	T(1): 0.0; Y(3): 0.0; Y(10): 0.0; T(12): 0.0; Y(17): 100.0	1	747			53190000	Light	Unique	Used	3.661	52550000	11390000		28	0.0511436	0	7	4	598.768	2392.05	-0.09	33.96	7653	7653	CAL27_CURCUMIN_pTy_R1.raw
1	SSGSGSSVADERVDyVVVDQQK	Y15;	Replicate 1	Unambiguous	GAB1	NP_002030.2	2549	GRB2-associated-binding protein 1 isoform b	2	1	46370073	Y15(Phospho)	1	S(1): 0.0; S(2): 0.0; S(4): 0.0; S(6): 0.0; S(7): 0.0; Y(15): 100.0	1	4094			22270000	Light	Redundant	Not	0.715	22270000	24710000		29	0.0382599	1	27	3	798.027	2392.07	-0.59	55.81	13530	13530	CAL27_CURCUMIN_pTy_R1.raw
1	yLPRPANPDEIGNFIDENLK	Y1;	Replicate 1	Unambiguous	CDH1	NP_004351.1	999	cadherin-1 preproprotein	1	1	4757960	Y1(Phospho)	1	Y(1): 100.0	1	13235			19040000	Light	Redundant	Not	4.627	19040000	3265000		42	0.00200349	0	29	3	799.05	2395.14	1.28	112.49	28702	28702	CAL27_CURCUMIN_pTy_R1.raw
1	YLCEGTESPyQTGQLHPAIR	Y10;	Replicate 1	Unambiguous	PTPRK	NP_001278913.1	5796	receptor-type tyrosine-protein phosphatase kappa isoform f precursor	4	1	634743254	C3(Carbamidomethyl); Y10(Phospho)	1	Y(1): 0.0; T(6): 0.0; S(8): 0.0; Y(10): 99.1; T(12): 0.9	1	4881			24250000	Light	Redundant	Not	2.232	22900000	8142000		37	0.00686574	0	12	3	800.695	2400.07	0.21	60.44	14764	14764	CAL27_CURCUMIN_pTy_R1.raw
1	SSGSGSSVADERVDyVVVDQQK	Y15;	Replicate 1	Unambiguous	GAB1	NP_002030.2	2549	GRB2-associated-binding protein 1 isoform b	2	1	46370073	R12(Label:13C(6)); Y15(Phospho); K22(Label:13C(6))	1	S(1): 0.0; S(2): 0.0; S(4): 0.0; S(6): 0.0; S(7): 0.0; Y(15): 100.0	1	4094			24710000	Heavy	Redundant	Not	0.715	22270000	24710000		31	0.0213602	1	24	3	802.039	2404.1	-1.41	55.79	13526	13526	CAL27_CURCUMIN_pTy_R1.raw
1	KDLyANTVLSGGTTMYPGIADR	Y4;	Replicate 1	Unambiguous	ACTG1	NP_001186883.1	71	actin, cytoplasmic 2	2	1	316659409	T7(Phospho)	1	Y(4): 99.2; T(7): 0.8; S(10): 0.0; T(13): 0.0; T(14): 0.0; Y(16): 0.0	1	8668			7027000	Light	Redundant	Not	1.605	7027000	3474000		49	0.000345382	1	37	3	808.382	2423.13	-0.01	84.14	21090	21090	CAL27_CURCUMIN_pTy_R1.raw
1	GGPGSAVSPyPTFNPSSDVAALHK	Y10;	Replicate 1	Unambiguous	ANXA1	NP_000691.1	301	annexin A1	1	1	4502101	Y10(Phospho)	1	S(5): 0.8; S(8): 0.8; Y(10): 98.3; T(12): 0.0; S(16): 0.0; S(17): 0.0	1	7478			60430000	Light	Redundant	Not	3.334	60430000	14380000		56	8.69542e-05	0	3	3	812.713	2436.13	0.89	76.75	19126	19126	CAL27_CURCUMIN_pTy_R1.raw
1	NKPyISWPSSGGSEPSVTVPLR	Y4;	Replicate 1	Unambiguous	CDC42BPB	NP_006026.3	9578	serine/threonine-protein kinase MRCK beta	1	1	115527097	Y4(Phospho)	1	Y(4): 99.1; S(6): 0.9; S(9): 0.0; S(10): 0.0; S(13): 0.0; S(16): 0.0; T(18): 0.0	1	9751		1	4204000	Light	Excluded by Method	Not	4.3215	2514000	461700		38	0.00464782	0	12	3	813.398	2438.18	1.73	91.25	22999	22999	CAL27_CURCUMIN_pTy_R1.raw
1	NTyNQTALDIVNQFTTSQASR	Y3;	Replicate 1	Unambiguous	CASKIN2	NP_001136115.1	57513	caskin-2 isoform b	2	1	217416350	Y3(Phospho)	1	T(2): 1.0; Y(3): 99.0; T(6): 0.0; T(15): 0.0; T(16): 0.0; S(17): 0.0; S(20): 0.0	1	12691			21070000	Light	Redundant	Not	0.891	21070000	18760000		138	5.97712e-13	0	0	2	1226.56	2452.12	1.48	109.15	27803	27803	CAL27_CURCUMIN_pTy_R1.raw
1	NTyNQTALDIVNQFTTSQASR	Y3;	Replicate 1	Unambiguous	CASKIN2	NP_001136115.1	57513	caskin-2 isoform b	2	1	217416350	T6(Phospho)	1	T(2): 1.0; Y(3): 99.0; T(6): 0.0; T(15): 0.0; T(16): 0.0; S(17): 0.0; S(20): 0.0	1	12689			37500000	Light	Redundant	Not	1.622	36520000	17870000		38	0.00596905	0	8	3	818.046	2452.12	4.29	109.14	27800	27800	CAL27_CURCUMIN_pTy_R1.raw
1	yQEAAPNVANNTGPHAASCFGAK	Y1;	Replicate 1	Unambiguous	CTNND1	NP_001193818.1	1500	catenin delta-1 isoform 2A	15	1	332688218	Y1(Phospho); C19(Carbamidomethyl)	1	Y(1): 100.0; T(12): 0.0; S(18): 0.0	1	3237			35980000	Light	Redundant	Not	4.016	35000000	6915000		37	0.00654869	0	69	3	819.021	2455.05	-0.61	50.47	12104	12104	CAL27_CURCUMIN_pTy_R1.raw
1	NTyNQTALDIVNQFTTSQASR	Y3;	Replicate 1	Unambiguous	CASKIN2	NP_001136115.1	57513	caskin-2 isoform b	2	1	217416350	Y3(Phospho); R21(Label:13C(6))	1	T(2): 1.0; Y(3): 99.0; T(6): 0.0; T(15): 0.0; T(16): 0.0; S(17): 0.0; S(20): 0.0	1	12689			17870000	Heavy	Redundant	Not	1.622	36520000	17870000		57	7.25182e-05	0	66	3	820.049	2458.13	-0.93	109.21	27820	27820	CAL27_CURCUMIN_pTy_R1.raw
1	NTyNQTALDIVNQFTTSQASR	Y3;	Replicate 1	Unambiguous	CASKIN2	NP_001136115.1	57513	caskin-2 isoform b	2	1	217416350	Y3(Phospho); R21(Label:13C(6))	1	T(2): 1.0; Y(3): 99.0; T(6): 0.0; T(15): 0.0; T(16): 0.0; S(17): 0.0; S(20): 0.0	1	12691			25100000	Heavy	Redundant	Not	0.891	21070000	18760000		113	1.86784e-10	0	13	2	1229.57	2458.14	2.53	109.16	27807	27807	CAL27_CURCUMIN_pTy_R1.raw
1	yQEAAPNVANNTGPHAASCFGAK	Y1;	Replicate 1	Unambiguous	CTNND1	NP_001193818.1	1500	catenin delta-1 isoform 2A	15	1	332688218	Y1(Phospho); C19(Carbamidomethyl); K23(Label:13C(6))	1	Y(1): 100.0; T(12): 0.0; S(18): 0.0	1	3237			6915000	Heavy	Redundant	Not	4.016	35000000	6915000		38	0.00496079	0	29	3	821.03	2461.07	2.08	50.71	12168	12168	CAL27_CURCUMIN_pTy_R1.raw
1	SHyADVDPENQNFLLESNLGK	Y3;	Replicate 1	Unambiguous	SLC38A2	NP_061849.2	54407	sodium-coupled neutral amino acid transporter 2	1	1	21361602	Y3(Phospho)	1	S(1): 0.7; Y(3): 99.3; S(17): 0.0	1	8816			58020000	Light	Redundant	Not	0.683	56870000	66040000		66	8.33439e-06	0	8	3	824.035	2470.09	-0.57	85.18	21367	21367	CAL27_CURCUMIN_pTy_R1.raw
1	SHyADVDPENQNFLLESNLGK	Y3;	Replicate 1	Unambiguous	SLC38A2	NP_061849.2	54407	sodium-coupled neutral amino acid transporter 2	1	1	21361602	Y3(Phospho); K21(Label:13C(6))	1	S(1): 0.7; Y(3): 99.3; S(17): 0.0	1	8816			66040000	Heavy	Redundant	Not	0.683	56870000	66040000		86	7.13769e-08	0	4	3	826.043	2476.11	0.4	85.13	21353	21353	CAL27_CURCUMIN_pTy_R1.raw
1	SHyADVDPENQNFLLESNLGK	Y3;	Replicate 1	Unambiguous	SLC38A2	NP_061849.2	54407	sodium-coupled neutral amino acid transporter 2	1	1	21361602	Y3(Phospho); K21(Label:13C(6))	1	S(1): 0.7; Y(3): 99.3; S(17): 0.0	1	8816			66040000	Heavy	Redundant	Not	0.683	56870000	66040000		64	1.27041e-05	0	3	3	826.043	2476.11	0.55	85.75	21520	21520	CAL27_CURCUMIN_pTy_R1.raw
1	RPAGSVQNPVyHNQPLNPAPSR	Y11;	Replicate 1	Unambiguous	EGFR	NP_005219.2	1956	epidermal growth factor receptor isoform a precursor	1	1	29725609	Y11(Phospho)	1	S(5): 0.0; Y(11): 100.0; S(21): 0.0	1	2679			26830000	Light	Redundant	Not	3.486	26830000	6108000		35	0.00835407	0	41	4	620.554	2479.19	-1.68	46.85	11131	11131	CAL27_CURCUMIN_pTy_R1.raw
1	RPAGSVQNPVyHNQPLNPAPSR	Y11;	Replicate 1	Unambiguous	EGFR	NP_005219.2	1956	epidermal growth factor receptor isoform a precursor	1	1	29725609	Y11(Phospho)	1	S(5): 0.0; Y(11): 100.0; S(21): 0.0	1	2679			26830000	Light	Redundant	Not	3.486	26830000	6108000		50	0.000317063	0	3	4	620.555	2479.2	-0.1	47.45	11288	11288	CAL27_CURCUMIN_pTy_R1.raw
1	RPAGSVQNPVyHNQPLNPAPSR	Y11;	Replicate 1	Unambiguous	EGFR	NP_005219.2	1956	epidermal growth factor receptor isoform a precursor	1	1	29725609	Y11(Phospho)	1	S(5): 0.0; Y(11): 100.0; S(21): 0.0	1	2665			520400000	Light	Redundant	Not	3.44	512300000	118200000		67	5.21634e-06	0	1	3	827.072	2479.2	0.82	47.34	11261	11261	CAL27_CURCUMIN_pTy_R1.raw
1	RPAGSVQNPVyHNQPLNPAPSR	Y11;	Replicate 1	Unambiguous	EGFR	NP_005219.2	1956	epidermal growth factor receptor isoform a precursor	1	1	29725609	Y11(Phospho)	1	S(5): 0.0; Y(11): 100.0; S(21): 0.0	1	2665			520400000	Light	Redundant	Not	3.44	512300000	118200000		45	0.000988426	0	0	3	827.073	2479.2	1.78	46.74	11101	11101	CAL27_CURCUMIN_pTy_R1.raw
1	TTEDEVHICHNQDGySYPSR	Y15;	Replicate 1	Unambiguous	LDLR	NP_001182728.1	3949	low-density lipoprotein receptor isoform 3 precursor	4	1	307775414	C9(Carbamidomethyl); Y15(Phospho)	1	T(1): 0.0; T(2): 0.0; Y(15): 99.4; S(16): 0.6; Y(17): 0.0; S(19): 0.0	1	2091			39510000	Light	Redundant	Not	0.843	39510000	37180000		37	0.00431976	0	0	3	830	2487.99	-0.4	43.2	10147	10147	CAL27_CURCUMIN_pTy_R1.raw
1	RPAGSVQNPVyHNQPLNPAPSR	Y11;	Replicate 1	Unambiguous	EGFR	NP_005219.2	1956	epidermal growth factor receptor isoform a precursor	1	1	29725609	R1(Label:13C(6)); Y11(Phospho); R22(Label:13C(6))	1	S(5): 0.0; Y(11): 100.0; S(21): 0.0	1	2679			6108000	Heavy	Redundant	Not	3.486	26830000	6108000		44	0.000727707	0	67	4	623.565	2491.24	-1.27	46.97	11164	11164	CAL27_CURCUMIN_pTy_R1.raw
1	RPAGSVQNPVyHNQPLNPAPSR	Y11;	Replicate 1	Unambiguous	EGFR	NP_005219.2	1956	epidermal growth factor receptor isoform a precursor	1	1	29725609	R1(Label:13C(6)); Y11(Phospho); R22(Label:13C(6))	1	S(5): 0.0; Y(11): 100.0; S(21): 0.0	1	2665			118200000	Heavy	Redundant	Not	3.44	512300000	118200000		51	0.00015169	0	63	3	831.084	2491.24	-0.35	47.5	11303	11303	CAL27_CURCUMIN_pTy_R1.raw
1	RPAGSVQNPVyHNQPLNPAPSR	Y11;	Replicate 1	Unambiguous	EGFR	NP_005219.2	1956	epidermal growth factor receptor isoform a precursor	1	1	29725609	R1(Label:13C(6)); Y11(Phospho); R22(Label:13C(6))	1	S(5): 0.0; Y(11): 100.0; S(21): 0.0	1	2665			118200000	Heavy	Redundant	Not	3.44	512300000	118200000		71	1.54866e-06	0	11	3	831.085	2491.24	0.53	46.91	11147	11147	CAL27_CURCUMIN_pTy_R1.raw
1	TTEDEVHICHNQDGySYPSR	Y15;	Replicate 1	Unambiguous	LDLR	NP_001182728.1	3949	low-density lipoprotein receptor isoform 3 precursor	4	1	307775414	C9(Carbamidomethyl); Y15(Phospho); R20(Label:13C(6))	1	T(1): 0.0; T(2): 0.0; Y(15): 99.4; S(16): 0.6; Y(17): 0.0; S(19): 0.0	1	2091			37530000	Heavy	Redundant	Not	0.843	39510000	37180000		41	0.00209221	0	3	3	832.008	2494.01	0.56	43.67	10272	10272	CAL27_CURCUMIN_pTy_R1.raw
1	YCRPESQEHPEADPGAAPyLK	Y19;	Replicate 1	Unambiguous	STAT3	NP_003141.2	6774	signal transducer and activator of transcription 3 isoform 2	1	1	21618338	C2(Carbamidomethyl); Y19(Phospho)	1	Y(1): 0.0; S(6): 0.0; Y(19): 100.0	1	2613			69100000	Light	Redundant	Not	0.709	67390000	75420000		28	0.0392371	0	0	3	832.363	2495.08	2.2	46.44	11019	11019	CAL27_CURCUMIN_pTy_R1.raw
1	VGQGYVYEAAQPEQDEyDIPR	Y17;	Replicate 1	Unambiguous	BCAR1	NP_001164190.1	9564	breast cancer anti-estrogen resistance protein 1 isoform 7	9	1	282398123	Y17(Phospho); R21(Label:13C(6))	1	Y(5): 0.0; Y(7): 0.0; Y(17): 100.0	1	6656			16090000	Heavy	Redundant	Not	0.781	15390000	15630000		38	0.00490758	0	35	3	838.369	2513.09	-1.06	71.16	17634	17634	CAL27_CURCUMIN_pTy_R1.raw
1	LCDFGSASHVADNDITPyLVSR	Y18;	Replicate 1	Unambiguous	PRPF4B	NP_003904.3	8899	serine/threonine-protein kinase PRP4 homolog	1	1	89276756	C2(Carbamidomethyl); Y18(Phospho)	1	S(6): 0.0; S(8): 0.0; T(16): 0.0; Y(18): 99.3; S(21): 0.7	1						No Quan Values	Not					42	0.00150359	0	4	3	839.709	2517.11	0.14	83.57	20935	20935	CAL27_CURCUMIN_pTy_R1.raw
1	LCDFGSASHVADNDITPyLVSR	Y18;	Replicate 1	Unambiguous	PRPF4B	NP_003904.3	8899	serine/threonine-protein kinase PRP4 homolog	1	1	89276756	C2(Carbamidomethyl); Y18(Phospho)	1	S(6): 0.0; S(8): 0.0; T(16): 0.0; Y(18): 99.3; S(21): 0.7	1						No Quan Values	Not					53	0.000121565	0	1	3	839.709	2517.11	0.21	85.11	21350	21350	CAL27_CURCUMIN_pTy_R1.raw
1	LCDFGSASHVADNDITPyLVSR	Y18;	Replicate 1	Unambiguous	PRPF4B	NP_003904.3	8899	serine/threonine-protein kinase PRP4 homolog	1	1	89276756	C2(Carbamidomethyl); Y18(Phospho)	1	S(6): 0.0; S(8): 0.0; T(16): 0.0; Y(18): 99.3; S(21): 0.7	1	8601			291100000	Light	Redundant	Not	0.957	291100000	241400000		117	5.35956e-11	0	3	2	1259.06	2517.11	0.37	84.32	21138	21138	CAL27_CURCUMIN_pTy_R1.raw
1	LCDFGSASHVADNDITPyLVSR	Y18;	Replicate 1	Unambiguous	PRPF4B	NP_003904.3	8899	serine/threonine-protein kinase PRP4 homolog	1	1	89276756	C2(Carbamidomethyl); Y18(Phospho)	1	S(6): 0.0; S(8): 0.0; T(16): 0.0; Y(18): 99.3; S(21): 0.7	1	8601			291100000	Light	Redundant	Not	0.957	291100000	241400000		36	0.00655809	0	0	2	1259.06	2517.11	0.56	84.98	21316	21316	CAL27_CURCUMIN_pTy_R1.raw
1	LCDFGSASHVADNDITPyLVSR	Y18;	Replicate 1	Unambiguous	PRPF4B	NP_003904.3	8899	serine/threonine-protein kinase PRP4 homolog	1	1	89276756	C2(Carbamidomethyl); Y18(Phospho)	1	S(6): 0.0; S(8): 0.0; T(16): 0.0; Y(18): 99.3; S(21): 0.7	1	8601			291100000	Light	Redundant	Not	0.957	291100000	241400000		38	0.00375233	0	0	2	1259.06	2517.11	1.24	83.73	20980	20980	CAL27_CURCUMIN_pTy_R1.raw
1	LCDFGSASHVADNDITPyLVSR	Y18;	Replicate 1	Unambiguous	PRPF4B	NP_003904.3	8899	serine/threonine-protein kinase PRP4 homolog	1	1	89276756	C2(Carbamidomethyl); Y18(Phospho); R22(Label:13C(6))	1	S(6): 0.0; S(8): 0.0; T(16): 0.0; Y(18): 99.3; S(21): 0.7	1	8601			248900000	Heavy	Redundant	Not	0.957	291100000	241400000		58	5.69832e-05	0	0	2	1262.07	2523.13	-0.65	84.97	21313	21313	CAL27_CURCUMIN_pTy_R1.raw
1	LCDFGSASHVADNDITPyLVSR	Y18;	Replicate 1	Unambiguous	PRPF4B	NP_003904.3	8899	serine/threonine-protein kinase PRP4 homolog	1	1	89276756	C2(Carbamidomethyl); Y18(Phospho); R22(Label:13C(6))	1	S(6): 0.0; S(8): 0.0; T(16): 0.0; Y(18): 99.3; S(21): 0.7	1	8601			248900000	Heavy	Redundant	Not	0.957	291100000	241400000		35	0.0106506	0	0	2	1262.07	2523.13	-0.45	83.75	20985	20985	CAL27_CURCUMIN_pTy_R1.raw
1	LCDFGSASHVADNDITPyLVSR	Y18;	Replicate 1	Unambiguous	PRPF4B	NP_003904.3	8899	serine/threonine-protein kinase PRP4 homolog	1	1	89276756	C2(Carbamidomethyl); Y18(Phospho); R22(Label:13C(6))	1	S(6): 0.0; S(8): 0.0; T(16): 0.0; Y(18): 99.3; S(21): 0.7	1	8593	1		3978000000	Heavy	Excluded by Method	Not	0.01	5315	1335000000		47	0.000674295	0	5	3	841.715	2523.13	-0.14	83.68	20967	20967	CAL27_CURCUMIN_pTy_R1.raw
1	RNyGGVYVGLPSEAVNMVSSQTK	Y3;	Replicate 1	Unambiguous	C12orf75	NP_001138671.1	387882	overexpressed in colon carcinoma 1 protein	1	1	223633952	Y3(Phospho)	1	Y(3): 99.1; Y(7): 0.9; S(12): 0.0; S(19): 0.0; S(20): 0.0; T(22): 0.0	1						No Quan Values	Not					29	0.0362065	1	58	3	846.071	2536.2	3.64	98.7	24999	24999	CAL27_CURCUMIN_pTy_R1.raw
1	EtAIELGYLTAEQFDEWVKPK	T2;	Replicate 1	Unambiguous	FH	NP_000134.2	2271	fumarate hydratase, mitochondrial	1	1	19743875	T2(Phospho)	1	T(2): 98.1; Y(8): 1.0; T(10): 1.0	1	16124			2654000	Light	Unique	Used	1.221	2654000	1725000		25	0.10042	0	3	3	849.741	2547.21	1.45	129.61	33294	33294	CAL27_CURCUMIN_pTy_R1.raw
1	EtAIELGYLTAEQFDEWVKPK	T2;	Replicate 1	Unambiguous	FH	NP_000134.2	2271	fumarate hydratase, mitochondrial	1	1	19743875	T2(Phospho); K19(Label:13C(6)); K21(Label:13C(6))	1	T(2): 98.1; Y(8): 1.0; T(10): 1.0	1	16124			2401000	Heavy	Redundant	Not	1.221	2654000	1725000		26	0.0723375	0	24	3	853.753	2559.24	-0.34	129.61	33296	33296	CAL27_CURCUMIN_pTy_R1.raw
1	VyFQSPPGAAGEGPGGADDEGPVRR	Y2;	Replicate 1	Unambiguous	PPP1R14B	NP_619634.1	26472	protein phosphatase 1 regulatory subunit 14B	1	1	20162550	Y2(Phospho)	1	Y(2): 100.0; S(5): 0.0	1	4691			45520000	Light	Redundant	Not	10.521	27980000	2110000		26	0.0850055	1	4	3	856.05	2566.14	-0.14	59.31	14463	14463	CAL27_CURCUMIN_pTy_R1.raw
1	VLPPEVADGGVVDSGVyAVPPPAER	Y17;	Replicate 1	Unambiguous	BCAR1	NP_001164190.1	9564	breast cancer anti-estrogen resistance protein 1 isoform 7	9	1	282398123	Y17(Phospho)	1	S(14): 0.0; Y(17): 100.0	1	8306			30020000	Light	Redundant	Not	0.988	15280000	12270000		35	0.0081988	0	2	3	857.423	2570.26	0.45	82.32	20615	20615	CAL27_CURCUMIN_pTy_R1.raw
1	VLPPEVADGGVVDSGVyAVPPPAER	Y17;	Replicate 1	Unambiguous	BCAR1	NP_001164190.1	9564	breast cancer anti-estrogen resistance protein 1 isoform 7	9	1	282398123	Y17(Phospho); R25(Label:13C(6))	1	S(14): 0.0; Y(17): 100.0	1	8484			15770000	Heavy	Redundant	Not	1.283	25490000	15770000		30	0.0220971	0	14	3	859.43	2576.28	0.81	83.01	20790	20790	CAL27_CURCUMIN_pTy_R1.raw
1	VLPPEVADGGVVDSGVyAVPPPAER	Y17;	Replicate 1	Unambiguous	BCAR1	NP_001164190.1	9564	breast cancer anti-estrogen resistance protein 1 isoform 7	9	1	282398123	Y17(Phospho); R25(Label:13C(6))	1	S(14): 0.0; Y(17): 100.0	1	8306			12270000	Heavy	Redundant	Not	0.988	15280000	12270000		26	0.0601789	0	29	3	859.431	2576.28	1.52	81.94	20512	20512	CAL27_CURCUMIN_pTy_R1.raw
1	YCRPESQEHPEADPGSAAPyLK	Y20;	Replicate 1	Unambiguous	STAT3	NP_998827.1	6774	signal transducer and activator of transcription 3 isoform 3	2	1	47458820	C2(Carbamidomethyl); Y20(Phospho)	1	Y(1): 0.0; S(6): 0.0; S(16): 0.0; Y(20): 100.0	1	2737			271600000	Light	Redundant	Not	0.708	267000000	299300000		51	0.000221692	0	0	3	861.373	2582.1	1.14	47.85	11397	11397	CAL27_CURCUMIN_pTy_R1.raw
1	WDEMNILATYHPADKDyGLMK	Y17;	Replicate 1	Unambiguous	PPP1R2	NP_001278434.1	5504	protein phosphatase inhibitor 2 isoform 3	3	1	613410239	Y17(Phospho)	1	T(9): 0.0; Y(10): 0.0; Y(17): 100.0	1				5726000		No Quan Values	Not					32	0.0214596	1	9	3	864.384	2591.14	0.59	99.44	25196	25196	CAL27_CURCUMIN_pTy_R1.raw
1	YCRPESQEHPEADPGSAAPyLK	Y20;	Replicate 1	Unambiguous	STAT3	NP_998827.1	6774	signal transducer and activator of transcription 3 isoform 3	2	1	47458820	C2(Carbamidomethyl); R3(Label:13C(6)); Y20(Phospho); K22(Label:13C(6))	1	Y(1): 0.0; S(6): 0.0; S(16): 0.0; Y(20): 100.0	1	2737			299300000	Heavy	Redundant	Not	0.708	267000000	299300000		29	0.0509405	0	3	3	865.387	2594.15	1.92	47.23	11232	11232	CAL27_CURCUMIN_pTy_R1.raw
1	SHyADVDPENQNFLLESNLGKK	Y3;	Replicate 1	Unambiguous	SLC38A2	NP_061849.2	54407	sodium-coupled neutral amino acid transporter 2	1	1	21361602	Y3(Phospho)	1	S(1): 0.7; Y(3): 99.3; S(17): 0.0	1	7665			5023000	Light	Redundant	Not	0.752	5023000	5301000		30	0.0299068	1	34	3	866.735	2598.19	0.99	77.5	19326	19326	CAL27_CURCUMIN_pTy_R1.raw
1	NNyALNTTATYAEPYRPIQYR	Y3;	Replicate 1	Unambiguous	PKP4	NP_001005476.1	8502	plakophilin-4 isoform b	2	1	53829376	Y3(Phospho)	1	Y(3): 100.0; T(7): 0.0; T(8): 0.0; T(10): 0.0; Y(11): 0.0; Y(15): 0.0; Y(20): 0.0	1	7239		1	3086000	Light	Excluded by Method	Not	1.33808	829500	492000		33	0.0161018	0	8	3	867.072	2599.2	1.1	74.7	18582	18582	CAL27_CURCUMIN_pTy_R1.raw
1	NNyALNTTATYAEPYRPIQYR	Y3;	Replicate 1	Unambiguous	PKP4	NP_001005476.1	8502	plakophilin-4 isoform b	2	1	53829376	Y11(Phospho)	1	Y(3): 100.0; T(7): 0.0; T(8): 0.0; T(10): 0.0; Y(11): 0.0; Y(15): 0.0; Y(20): 0.0	1	6888			28110000	Light	Redundant	Not	1.674	28110000	13320000		23	0.151312	0	6	3	867.072	2599.2	1.17	73.23	18188	18188	CAL27_CURCUMIN_pTy_R1.raw
1	KTPQGPPEIySDTQFPSLQSTAK	Y10;	Replicate 1	Unambiguous	CDV3	NP_001269691.1	55573	protein CDV3 homolog isoform d	6	1	544346257	Y10(Phospho)	1	T(2): 0.0; Y(10): 100.0; S(11): 0.0; T(13): 0.0; S(17): 0.0; S(20): 0.0; T(21): 0.0	1	7425			78420000	Light	Redundant	Not	5.032	76760000	12100000		58	4.22564e-05	1	0	3	867.415	2600.23	0.53	76.49	19059	19059	CAL27_CURCUMIN_pTy_R1.raw
1	LVPLYAVVSEEPIyIVTEFMSK	Y14;	Replicate 1	Unambiguous	YES1	NP_005424.1	7525	tyrosine-protein kinase Yes	1	1	4885661	Y14(Phospho)	1	Y(5): 0.0; S(9): 0.0; Y(14): 100.0; T(17): 0.0; S(21): 0.0	1	17761			1971000	Light	Redundant	Not	0.952	1870000	1559000		21	0.151125	0	3	3	869.773	2607.31	-0.42	146.85	37832	37832	CAL27_CURCUMIN_pTy_R1.raw
1	NNyALNTTATYAEPYRPIQYR	Y3;	Replicate 1	Unambiguous	PKP4	NP_001005476.1	8502	plakophilin-4 isoform b	2	1	53829376	Y11(Phospho); R16(Label:13C(6)); R21(Label:13C(6))	1	Y(3): 100.0; T(7): 0.0; T(8): 0.0; T(10): 0.0; Y(11): 0.0; Y(15): 0.0; Y(20): 0.0	1	6888			13320000	Heavy	Redundant	Not	1.674	28110000	13320000		35	0.00981206	0	0	3	871.086	2611.24	1.87	72.7	18045	18045	CAL27_CURCUMIN_pTy_R1.raw
1	LVPLYAVVSEEPIyIVTEFMSK	Y14;	Replicate 1	Unambiguous	YES1	NP_005424.1	7525	tyrosine-protein kinase Yes	1	1	4885661	Y14(Phospho); K22(Label:13C(6))	1	Y(5): 0.0; S(9): 0.0; Y(14): 100.0; T(17): 0.0; S(21): 0.0	1	17761			1559000	Heavy	Unique	Used	0.952	1870000	1559000		37	0.00398067	0	13	3	871.782	2613.33	1.19	146.78	37814	37814	CAL27_CURCUMIN_pTy_R1.raw
1	VyAPASTLVDQPYANEGTVVVTER	Y2;	Replicate 1	Unambiguous	DSG2	NP_001934.2	1829	desmoglein-2 preproprotein	1	1	116534898	Y2(Phospho)	1	Y(2): 100.0; S(6): 0.0; T(7): 0.0; Y(13): 0.0; T(18): 0.0; T(22): 0.0	1	8775			14810000	Light	Redundant	Not	1.594	14810000	7371000		42	0.00150201	0	15	3	887.095	2659.27	2.08	84.84	21276	21276	CAL27_CURCUMIN_pTy_R1.raw
1	WKLEDYFETDSSySDANNFIR	Y13;	Replicate 1	Unambiguous	FRK	NP_002022.1	2444	tyrosine-protein kinase FRK	1	1	4503787	Y13(Phospho)	1	Y(6): 0.0; T(9): 0.0; S(11): 0.0; S(12): 0.6; Y(13): 98.8; S(14): 0.6	1	13029			33150000	Light	Redundant	Not	0.451	33150000	58380000		70	3.61277e-06	1	37	3	894.047	2680.13	0.84	111.29	28378	28378	CAL27_CURCUMIN_pTy_R1.raw
1	WKLEDYFETDSSySDANNFIR	Y13;	Replicate 1	Unambiguous	FRK	NP_002022.1	2444	tyrosine-protein kinase FRK	1	1	4503787	K2(Label:13C(6)); Y13(Phospho); R21(Label:13C(6))	1	Y(6): 0.0; T(9): 0.0; S(11): 0.0; S(12): 0.6; Y(13): 98.8; S(14): 0.6	1	13029			58380000	Heavy	Redundant	Not	0.451	33150000	58380000		83	1.37771e-07	1	40	3	898.059	2692.16	-0.99	111.83	28523	28523	CAL27_CURCUMIN_pTy_R1.raw
1	WKLEDYFETDSSySDANNFIR	Y13;	Replicate 1	Unambiguous	FRK	NP_002022.1	2444	tyrosine-protein kinase FRK	1	1	4503787	K2(Label:13C(6)); Y13(Phospho); R21(Label:13C(6))	1	Y(6): 0.0; T(9): 0.0; S(11): 0.0; S(12): 0.6; Y(13): 98.8; S(14): 0.6	1	13029			58380000	Heavy	Redundant	Not	0.451	33150000	58380000		97	6.02594e-09	1	0	3	898.06	2692.16	0.23	111.21	28356	28356	CAL27_CURCUMIN_pTy_R1.raw
1	GHGQPGADAEKPFyVNVEFHHER	Y14;	Replicate 1	Unambiguous	BCR	NP_067585.2	613	breakpoint cluster region protein isoform 2	2	1	82546845	Y14(Phospho)	1	Y(14): 100.0	1				6627000		No Quan Values	Not					36	0.00884107	0	6	4	676.054	2701.19	0.1	61.99	15178	15178	CAL27_CURCUMIN_pTy_R1.raw
1	GHGQPGADAEKPFyVNVEFHHER	Y14;	Replicate 1	Unambiguous	BCR	NP_067585.2	613	breakpoint cluster region protein isoform 2	2	1	82546845	Y14(Phospho)	1	Y(14): 100.0	1	5048		1	4269000	Light	Excluded by Method	Not	0.26387	4269000	12840000		33	0.0165779	0	44	4	676.054	2701.2	0.47	61.39	15018	15018	CAL27_CURCUMIN_pTy_R1.raw
1	GHGQPGADAEKPFyVNVEFHHER	Y14;	Replicate 1	Unambiguous	BCR	NP_067585.2	613	breakpoint cluster region protein isoform 2	2	1	82546845	K11(Label:13C(6)); Y14(Phospho); R23(Label:13C(6))	1	Y(14): 100.0	1	5048		1	41330000	Heavy	Excluded by Method	Not	0.26387	4269000	12840000		32	0.0184569	0	25	4	679.064	2713.23	-0.7	61.67	15093	15093	CAL27_CURCUMIN_pTy_R1.raw
1	EDRPISFyQLGSNQLQSNAVSLAR	Y8;	Replicate 1	Unambiguous	ASAP2	NP_001128663.1	8853	arf-GAP with SH3 domain, ANK repeat and PH domain-containing protein 2 isoform b	2	1	206597522	Y8(Phospho)	1	S(6): 0.8; Y(8): 99.2; S(12): 0.0; S(17): 0.0; S(21): 0.0	1						No Quan Values	Not					56	6.93659e-05	0	41	3	925.118	2773.34	2.71	93.4	23573	23573	CAL27_CURCUMIN_pTy_R1.raw
1	IDSIPHLNNSTPLVDPSVyGYGVQK	Y19;	Replicate 1	Unambiguous	FUBP3	NP_003925.1	8939	far upstream element-binding protein 3	1	1	100816392	Y19(Phospho)	1	S(3): 0.0; S(10): 0.0; T(11): 0.0; S(17): 0.0; Y(19): 99.3; Y(21): 0.7	1	9519			17400000	Light	Redundant	Not	7	16390000	1858000		45	0.000757545	0	0	3	931.788	2793.35	-0.35	89.77	22602	22602	CAL27_CURCUMIN_pTy_R1.raw
1	EADPSNFANFSAyPSEEDMIEWAK	Y13;	Replicate 1	Unambiguous	EPS15	NP_001153441.1	2060	epidermal growth factor receptor substrate 15 isoform B	2	1	229577185	Y13(Phospho)	1	S(5): 0.0; S(11): 1.0; Y(13): 99.0; S(15): 0.0	1	13241		1	2949000	Light	Excluded by Method	Not	3.60073	2949000	650000		27	0.048504	0	12	3	943.388	2828.15	1.6	112.51	28708	28708	CAL27_CURCUMIN_pTy_R1.raw
1	KGHGQPGADAEKPFyVNVEFHHER	Y15;	Replicate 1	Unambiguous	BCR	NP_067585.2	613	breakpoint cluster region protein isoform 2	2	1	82546845	Y15(Phospho)	1	Y(15): 100.0	1				92250000		No Quan Values	Not					31	0.0271769	1	30	5	566.664	2829.29	-0.34	57.93	14094	14094	CAL27_CURCUMIN_pTy_R1.raw
1	AyHEQLSVAEITNACFEPANQMVK	Y2;	Replicate 1	Unambiguous	TUBA4A	NP_001265481.1	7277	tubulin alpha-4A chain isoform 2	7	1	514052659	Y2(Phospho); C15(Carbamidomethyl)	1	Y(2): 100.0; S(7): 0.0; T(12): 0.0	1	10508			68030000	Light	Redundant	Not	3.882	53150000	10860000		55	0.000101568	0	0	3	944.09	2830.26	-0.51	95.87	24238	24238	CAL27_CURCUMIN_pTy_R1.raw
1	LKEEDMAMNAQQDNILyQTVTGLK	Y17;	Replicate 1	Unambiguous	RIOK1	NP_694550.1	83732	serine/threonine-protein kinase RIO1 isoform 2	2	1	23510358	Y17(Phospho)	1	Y(17): 100.0; T(19): 0.0; T(21): 0.0	1	12040	1		10260000	Light	Excluded by Method	Not	100	3024000	5315		60	2.78966e-05	1	53	3	945.107	2833.31	-2.8	105.19	26741	26741	CAL27_CURCUMIN_pTy_R1.raw
1	KGHGQPGADAEKPFyVNVEFHHER	Y15;	Replicate 1	Unambiguous	BCR	NP_067585.2	613	breakpoint cluster region protein isoform 2	2	1	82546845	K1(Label:13C(6)); K12(Label:13C(6)); Y15(Phospho); R24(Label:13C(6))	1	Y(15): 100.0	1	4446			33320000	Heavy	Redundant	Not	1.282	53810000	33320000		27	0.0553838	1	4	4	712.593	2847.35	0.07	57.88	14080	14080	CAL27_CURCUMIN_pTy_R1.raw
1	AGKPGLPAPDELVyQVPQSTQEVSGAGR	Y14;	Replicate 1	Unambiguous	DCBLD2	NP_563615.3	131566	discoidin, CUB and LCCL domain-containing protein 2 precursor	1	1	54792129	Y14(Phospho)	1	Y(14): 100.0; S(19): 0.0; T(20): 0.0; S(24): 0.0	1	8827			101800000	Light	Redundant	Not	2.187	100200000	36370000		49	0.000268529	0	0	3	977.813	2931.43	0.26	85.52	21460	21460	CAL27_CURCUMIN_pTy_R1.raw
1	AGKPGLPAPDELVyQVPQSTQEVSGAGR	Y14;	Replicate 1	Unambiguous	DCBLD2	NP_563615.3	131566	discoidin, CUB and LCCL domain-containing protein 2 precursor	1	1	54792129	Y14(Phospho)	1	Y(14): 100.0; S(19): 0.0; T(20): 0.0; S(24): 0.0	1	8827			101800000	Light	Redundant	Not	2.187	100200000	36370000		49	0.000265421	0	15	3	977.814	2931.43	0.7	86.15	21628	21628	CAL27_CURCUMIN_pTy_R1.raw
1	VGNYETDTNSSVDQEKFyAELSDLK	Y18;	Replicate 1	Unambiguous	EHBP1	NP_001136088.1	23301	EH domain-binding protein 1 isoform 3	3	1	217330574	Y18(Phospho)	1	Y(4): 0.0; T(6): 0.0; T(8): 0.0; S(10): 1.2; S(11): 1.2; Y(18): 97.6; S(22): 0.0	1	9567	1		13700000	Light	Excluded by Method	Not	100	2425000	5315		26	0.0614523	1	0	3	978.096	2932.27	-0.92	90.04	22674	22674	CAL27_CURCUMIN_pTy_R1.raw
1	HSTPVVMPEPNGLyGGFPFPLEMENK	Y14;	Replicate 1	Unambiguous	FAT2	NP_001438.1	2196	protocadherin Fat 2 precursor	1	1	13787217	Y14(Phospho)	1	S(2): 0.0; T(3): 0.0; Y(14): 100.0	1	14299			75070000	Light	Redundant	Not	3.101	72290000	18500000		53	0.000163238	0	4	3	989.788	2967.35	1.62	119.14	30485	30485	CAL27_CURCUMIN_pTy_R1.raw
1	VAQQPLSLVGCEVVPDPSPDHLySFR	Y23;	Replicate 1	Unambiguous	AFAP1L2	NP_115939.1	84632	actin filament-associated protein 1-like 2 isoform 2	3	1	24308338	C11(Carbamidomethyl); Y23(Phospho)	1	S(7): 0.0; S(18): 0.0; Y(23): 99.2; S(24): 0.8	1	11778			729400000	Light	Redundant	Not	0.926	698400000	598300000		28	0.0416844	0	2	3	997.475	2990.41	-0.88	104.3	26501	26501	CAL27_CURCUMIN_pTy_R1.raw
1	VAQQPLSLVGCEVVPDPSPDHLySFR	Y23;	Replicate 1	Unambiguous	AFAP1L2	NP_115939.1	84632	actin filament-associated protein 1-like 2 isoform 2	3	1	24308338	C11(Carbamidomethyl); Y23(Phospho)	1	S(7): 0.0; S(18): 0.0; Y(23): 99.2; S(24): 0.8	1	11778			729400000	Light	Redundant	Not	0.926	698400000	598300000		32	0.0160907	0	2	3	997.477	2990.42	1.26	103.69	26339	26339	CAL27_CURCUMIN_pTy_R1.raw
1	VAQQPLSLVGCEVVPDPSPDHLySFR	Y23;	Replicate 1	Unambiguous	AFAP1L2	NP_115939.1	84632	actin filament-associated protein 1-like 2 isoform 2	3	1	24308338	C11(Carbamidomethyl); S24(Phospho); R26(Label:13C(6))	1	S(7): 0.0; S(18): 0.0; Y(23): 99.2; S(24): 0.8	1	11778			598300000	Heavy	Redundant	Not	0.926	698400000	598300000		24	0.117526	0	72	3	999.481	2996.43	-1.3	103.56	26304	26304	CAL27_CURCUMIN_pTy_R1.raw
1	QQPTQFINPETPGyVGFANLPNQVHR	Y14;	Replicate 1	Unambiguous	42249	NP_004395.1	4735	septin-2 isoform a	3	1	4758158	Y14(Phospho)	1	T(4): 0.0; T(11): 0.9; Y(14): 99.1	1	10255		1	55310000	Light	Excluded by Method	Not	5.72241	9157000	1270000		48	0.000431942	0	38	3	1011.49	3032.44	0.47	94.28	23812	23812	CAL27_CURCUMIN_pTy_R1.raw
1	EDMAALEKDyEEVGADSADGEDEGEEY	Y10;	Replicate 1	Unambiguous	TUBA1C	NP_116093.1	84790	tubulin alpha-1C chain	1	1	14389309	Y10(Phospho)	1	Y(10): 100.0; S(17): 0.0; Y(27): 0.0	1	7270			32130000	Light	Redundant	Not	1.445	32130000	17650000		27	0.0414913	1	0	3	1016.04	3046.12	-1.24	75.44	18778	18778	CAL27_CURCUMIN_pTy_R1.raw
1	SFIKDyPVVSIEDPFDQDDWGAWQK	Y6;	Replicate 1	Unambiguous	ENO1	NP_001419.1	2023	alpha-enolase isoform 1	2	1	4503571	Y6(Phospho)	1	S(1): 1.0; Y(6): 99.0; S(10): 0.0	1	14825			27670000	Light	Redundant	Not	0.815	20620000	20080000		30	0.0361662	1	28	3	1022.46	3065.36	-0.9	122.11	31282	31282	CAL27_CURCUMIN_pTy_R1.raw
1	TVQPVAMGPDGLPVDASSVSNNyIQTLGR	Y23;	Replicate 1	Unambiguous	CTNND1	NP_001193818.1	1500	catenin delta-1 isoform 2A	15	1	332688218	Y23(Phospho)	1	T(1): 0.0; S(17): 0.0; S(18): 0.0; S(20): 0.0; Y(23): 100.0; T(26): 0.0	1	10653			71330000	Light	Redundant	Not	4.227	52660000	9885000		100	2.48923e-09	0	4	3	1022.83	3066.46	0.77	96.74	24471	24471	CAL27_CURCUMIN_pTy_R1.raw
1	GPTSGPQSAPQIyGPPQYNIQYSSSAAVK	Y13;	Replicate 1	Unambiguous	ERBB2IP	NP_001006600.1	55914	protein LAP2 isoform 7	6	1	55770895	Y13(Phospho)	1	T(3): 0.0; S(4): 0.0; S(8): 0.0; Y(13): 100.0; Y(18): 0.0; Y(22): 0.0; S(23): 0.0; S(24): 0.0; S(25): 0.0	1	7126	1		2074000	Light	Redundant	Not	64.937	434900	5315		38	0.0056781	0	26	3	1025.15	3073.43	0.49	74.05	18408	18408	CAL27_CURCUMIN_pTy_R1.raw
1	SFIKDyPVVSIEDPFDQDDWGAWQK	Y6;	Replicate 1	Unambiguous	ENO1	NP_001419.1	2023	alpha-enolase isoform 1	2	1	4503571	K4(Label:13C(6)); Y6(Phospho); K25(Label:13C(6))	1	S(1): 1.0; Y(6): 99.0; S(10): 0.0	1	14825			20080000	Heavy	Redundant	Not	0.815	20620000	20080000		34	0.0117327	1	22	3	1026.47	3077.41	2.86	122.11	31283	31283	CAL27_CURCUMIN_pTy_R1.raw
1	SYEDMIGEEVPSDQyYWAPLAQHER	Y15;	Replicate 1	Unambiguous	CTNND1	NP_001193818.1	1500	catenin delta-1 isoform 2A	15	1	332688218	Y16(Phospho)	1	S(1): 0.0; Y(2): 0.0; S(12): 0.0; Y(15): 99.2; Y(16): 0.8	1	11931	1		75040000	Light	Excluded by Method	Not	100	13650000	5315		33	0.0154876	0	81	3	1031.77	3093.3	0.24	104.49	26552	26552	CAL27_CURCUMIN_pTy_R1.raw
1	SYEDMIGEEVPSDQyYWAPLAQHER	Y15;	Replicate 1	Unambiguous	CTNND1	NP_001193818.1	1500	catenin delta-1 isoform 2A	15	1	332688218	Y15(Phospho)	1	S(1): 0.0; Y(2): 0.0; S(12): 0.0; Y(15): 99.2; Y(16): 0.8	1	12191			28910000	Light	Redundant	Not	3.907	26460000	5373000		32	0.0215059	0	2	3	1031.77	3093.3	1.67	106.15	27000	27000	CAL27_CURCUMIN_pTy_R1.raw
2	WDsYENLSADGEVLHTQGPVDGSLyAK	S3; Y25;	Replicate 1	Unambiguous	TNS3	NP_073585.8	64759	tensin-3	1	1	65288071	S3(Phospho); Y25(Phospho); K27(Label:13C(6))	1	S(3): 100.0; Y(4): 0.0; S(8): 0.0; T(16): 0.0; S(23): 0.0; Y(25): 100.0	1	9669			187900000	Heavy	Redundant	Not	0.639	151300000	187900000		43	0.00136775	0	11	3	1039.78	3117.32	0.58	90.74	22860	22860	CAL27_CURCUMIN_pTy_R1.raw
1	NIILEEGKEILVGDVGQTVDDPyATFVK	Y23;	Replicate 1	Unambiguous	CFL1	NP_005498.1	1072	cofilin-1	1	1	5031635	Y23(Phospho)	1	T(18): 0.0; Y(23): 100.0; T(25): 0.0	1	14103			148600000	Light	Redundant	Not	4.026	141200000	27820000		96	5.30831e-09	1	3	3	1048.19	3142.56	0.92	117.81	30128	30128	CAL27_CURCUMIN_pTy_R1.raw
1	VITNQyNNPAGLYSSENISNFNNALESK	Y6;	Replicate 1	Unambiguous	PDLIM1	NP_066272.1	9124	PDZ and LIM domain protein 1	1	1	13994151	Y6(Phospho)	1	T(3): 0.0; Y(6): 100.0; Y(13): 0.0; S(14): 0.0; S(15): 0.0; S(19): 0.0; S(27): 0.0	1	10630			68170000	Light	Redundant	Not	6.591	63720000	7672000		109	4.24145e-10	0	0	3	1061.16	3181.45	1.19	96.59	24431	24431	CAL27_CURCUMIN_pTy_R1.raw
1	VITNQyNNPAGLYSSENISNFNNALESK	Y6;	Replicate 1	Unambiguous	PDLIM1	NP_066272.1	9124	PDZ and LIM domain protein 1	1	1	13994151	S15(Phospho)	1	T(3): 0.0; Y(6): 100.0; Y(13): 0.0; S(14): 0.0; S(15): 0.0; S(19): 0.0; S(27): 0.0	1	9684			32870000	Light	Redundant	Not	2.773	29620000	8478000		65	1.01037e-05	0	71	3	1061.16	3181.45	1.65	90.84	22888	22888	CAL27_CURCUMIN_pTy_R1.raw
1	NSFNNPAyYVLEGVPHQLLPPEPPSPAR	Y8;	Replicate 1	Unambiguous	INPPL1	NP_001558.3	3636	phosphatidylinositol 3,4,5-trisphosphate 5-phosphatase 2	1	1	222136583	Y8(Phospho)	1	S(2): 0.0; Y(8): 98.9; Y(9): 1.1; S(25): 0.0	1	15020			95570000	Light	Redundant	Not	2.465	95570000	30770000		39	0.00298387	0	12	3	1061.85	3183.54	2.13	123.22	31579	31579	CAL27_CURCUMIN_pTy_R1.raw
1	NSFNNPAyYVLEGVPHQLLPPEPPSPAR	Y8;	Replicate 1	Unambiguous	INPPL1	NP_001558.3	3636	phosphatidylinositol 3,4,5-trisphosphate 5-phosphatase 2	1	1	222136583	Y8(Phospho)	1	S(2): 0.0; Y(8): 98.9; Y(9): 1.1; S(25): 0.0	1	14919			201200000	Light	Redundant	Not	2.71	190100000	55660000		41	0.00191282	0	4	3	1061.85	3183.54	2.59	122.63	31422	31422	CAL27_CURCUMIN_pTy_R1.raw
1	ELDALGHELPVLAPQWEGyDELQTDGNR	Y19;	Replicate 1	Unambiguous	BID	NP_001187.1	637	BH3-interacting domain death agonist isoform 2	2	1	4557361	Y19(Phospho)	1	Y(19): 100.0; T(24): 0.0	1	13495	1		16450000	Light	Excluded by Method	Not	100	2326000	5315		52	0.000188238	0	10	3	1082.5	3245.49	2.49	114.04	29118	29118	CAL27_CURCUMIN_pTy_R1.raw
1	SVSSSPWLPQDGFDPSDyAEPMDAVVKPR	Y18;	Replicate 1	Unambiguous	ARHGAP35	NP_004482.4	2909	rho GTPase-activating protein 35	1	1	150417981	Y18(Phospho)	1	S(1): 0.0; S(3): 0.0; S(4): 0.0; S(5): 0.0; S(16): 1.1; Y(18): 98.9	1	12753			57150000	Light	Redundant	Not	0.95	57150000	47710000		37	0.00589031	0	2	3	1086.49	3257.45	0.59	109.56	27914	27914	CAL27_CURCUMIN_pTy_R1.raw
1	SVSSSPWLPQDGFDPSDyAEPMDAVVKPR	Y18;	Replicate 1	Unambiguous	ARHGAP35	NP_004482.4	2909	rho GTPase-activating protein 35	1	1	150417981	Y18(Phospho); K27(Label:13C(6)); R29(Label:13C(6))	1	S(1): 0.0; S(3): 0.0; S(4): 0.0; S(5): 0.0; S(16): 1.1; Y(18): 98.9	1	12671			100000000	Heavy	Redundant	Not	1.245	157000000	100000000		30	0.0390684	0	44	3	1090.5	3269.49	-1.42	109.07	27781	27781	CAL27_CURCUMIN_pTy_R1.raw
1	SVSSSPWLPQDGFDPSDyAEPMDAVVKPR	Y18;	Replicate 1	Unambiguous	ARHGAP35	NP_004482.4	2909	rho GTPase-activating protein 35	1	1	150417981	Y18(Phospho); K27(Label:13C(6)); R29(Label:13C(6))	1	S(1): 0.0; S(3): 0.0; S(4): 0.0; S(5): 0.0; S(16): 1.1; Y(18): 98.9	1	12753			66630000	Heavy	Redundant	Not	0.95	57150000	47710000		37	0.00717556	0	5	3	1090.5	3269.49	0.14	109.8	27979	27979	CAL27_CURCUMIN_pTy_R1.raw
1	SREEDPTLTEEEISAMySSVNKPGQLVNK	Y17;	Replicate 1	Unambiguous	PAG1	NP_060910.3	55824	phosphoprotein associated with glycosphingolipid-enriched microdomains 1	1	1	63054864	Y17(Phospho)	1	S(1): 0.0; T(7): 0.0; T(9): 0.0; S(14): 0.0; Y(17): 97.8; S(18): 1.1; S(19): 1.1	1	9447			9567000	Light	Redundant	Not	2.097	7699000	2914000		31	0.0244178	1	17	4	833.641	3331.54	0.54	89.26	22464	22464	CAL27_CURCUMIN_pTy_R1.raw
1	VAEDLESEGLMAEEVQAVQQQEVyGMMPR	Y24;	Replicate 1	Unambiguous	SPTAN1	NP_001182461.1	6709	spectrin alpha chain, non-erythrocytic 1 isoform 3	3	1	306966132	Y24(Phospho)	1	S(7): 0.0; Y(24): 100.0	1	14568			33080000	Light	Redundant	Not	4.124	30360000	5841000		75	9.84325e-07	0	3	3	1116.16	3346.47	-0.05	120.69	30900	30900	CAL27_CURCUMIN_pTy_R1.raw
1	GGAFDGTMNGPFGHGyGEGAGEGIDDVEWVVGK	Y16;	Replicate 1	Unambiguous	EHD1	NP_001269373.1	10938	EH domain-containing protein 1 isoform 1	2	1	540344515	Y16(Phospho)	1	T(7): 0.0; Y(16): 100.0	1	13600	1		5314000	Light	Excluded by Method	Not	100	1824000	5315		65	9.70246e-06	0	62	3	1121.47	3362.41	-0.16	114.74	29305	29305	CAL27_CURCUMIN_pTy_R1.raw
1	CGSGPVHISGQHLVAVEEDAEsEDEEEEDVK	S22;	Replicate 1	Unambiguous	NPM1	NP_954654.1	4869	nucleophosmin isoform 2	3	1	40353734	C1(Carbamidomethyl); S22(Phospho)	1	S(3): 0.0; S(9): 0.0; S(22): 100.0	1	6447			6850000	Light	Redundant	Not	0.849	6539000	6112000		55	8.76099e-05	0	6	4	865.863	3460.43	-1.56	69.88	17291	17291	CAL27_CURCUMIN_pTy_R1.raw
1	HSYPLSSTSGNADSSAVSSQAISPyACFYGASAK	Y25;	Replicate 1	Unambiguous	ARAP2	NP_056045.2	116984	arf-GAP with Rho-GAP domain, ANK repeat and PH domain-containing protein 2	1	1	21264592	Y25(Phospho); C27(Carbamidomethyl)	1	S(2): 0.0; Y(3): 0.0; S(6): 0.0; S(7): 0.0; T(8): 0.0; S(9): 0.0; S(14): 0.0; S(15): 0.0; S(18): 0.0; S(19): 0.0; S(23): 0.0; Y(25): 100.0; Y(29): 0.0; S(32): 0.0	1	7619			16930000	Light	Redundant	Not	1.035	16930000	12980000		66	6.78025e-06	0	9	3	1183.51	3548.53	-0.64	77.16	19235	19235	CAL27_CURCUMIN_pTy_R1.raw
1	HSYPLSSTSGNADSSAVSSQAISPyACFYGASAK	Y25;	Replicate 1	Unambiguous	ARAP2	NP_056045.2	116984	arf-GAP with Rho-GAP domain, ANK repeat and PH domain-containing protein 2	1	1	21264592	Y25(Phospho); C27(Carbamidomethyl); K34(Label:13C(6))	1	S(2): 0.0; Y(3): 0.0; S(6): 0.0; S(7): 0.0; T(8): 0.0; S(9): 0.0; S(14): 0.0; S(15): 0.0; S(18): 0.0; S(19): 0.0; S(23): 0.0; Y(25): 100.0; Y(29): 0.0; S(32): 0.0	1	7619			12980000	Heavy	Redundant	Not	1.035	16930000	12980000		34	0.0142298	0	0	3	1185.52	3554.54	-2.8	77.17	19239	19239	CAL27_CURCUMIN_pTy_R1.raw
1	VIQAQTAFSANPANPAILSEASAPIPHDGNLyPR	Y32;	Replicate 1	Unambiguous	SDCBP	NP_001007070.1	6386	syntenin-1 isoform 3	2	1	55749515	Y32(Phospho)	1	T(6): 0.0; S(9): 0.0; S(19): 0.0; S(22): 0.0; Y(32): 100.0	1	11240			79010000	Light	Redundant	Not	1.182	79010000	53060000		31	0.015994	0	0	3	1204.26	3610.77	-0.41	100.36	25443	25443	CAL27_CURCUMIN_pTy_R1.raw
1	VIQAQTAFSANPANPAILSEASAPIPHDGNLyPR	Y32;	Replicate 1	Unambiguous	SDCBP	NP_001007070.1	6386	syntenin-1 isoform 3	2	1	55749515	Y32(Phospho); R34(Label:13C(6))	1	T(6): 0.0; S(9): 0.0; S(19): 0.0; S(22): 0.0; Y(32): 100.0	1	11240			53060000	Heavy	Redundant	Not	1.182	79010000	53060000		32	0.0118292	0	79	3	1206.27	3616.79	-0.61	100.39	25451	25451	CAL27_CURCUMIN_pTy_R1.raw
1	EKAEERPTFDYLQSVLDDFYtATEGQYQQQP	T21;	Replicate 1	Unambiguous	LYN	NP_001104567.1	4067	tyrosine-protein kinase Lyn isoform B	2	1	162287326	Y27(Phospho)	1	T(8): 0.0; Y(11): 0.0; S(14): 0.0; Y(20): 1.4; T(21): 97.3; T(23): 1.4; Y(27): 0.0	1	16343			611000000	Light	Redundant	Not	0.888	595500000	532200000		27	0.0530258	1	6	3	1259.56	3776.66	-0.95	131.01	33669	33669	CAL27_CURCUMIN_pTy_R1.raw
1	EKAEERPTFDYLQSVLDDFYtATEGQYQQQP	T21;	Replicate 1	Unambiguous	LYN	NP_001104567.1	4067	tyrosine-protein kinase Lyn isoform B	2	1	162287326	T21(Phospho)	1	T(8): 0.0; Y(11): 0.0; S(14): 0.0; Y(20): 1.4; T(21): 97.3; T(23): 1.4; Y(27): 0.0	1	16370			82480000	Light	Redundant	Not	0.909	79920000	69740000		27	0.0592148	1	19	4	944.922	3776.67	0.93	131.1	33693	33693	CAL27_CURCUMIN_pTy_R1.raw
1	EKAEERPTFDYLQSVLDDFYtATEGQYQQQP	T21;	Replicate 1	Unambiguous	LYN	NP_001104567.1	4067	tyrosine-protein kinase Lyn isoform B	2	1	162287326	K2(Label:13C(6)); R6(Label:13C(6)); Y27(Phospho)	1	T(8): 0.0; Y(11): 0.0; S(14): 0.0; Y(20): 1.4; T(21): 97.3; T(23): 1.4; Y(27): 0.0	1	16370			69740000	Heavy	Redundant	Not	0.909	79920000	69740000		24	0.135725	1	15	4	947.933	3788.71	1.52	131.1	33694	33694	CAL27_CURCUMIN_pTy_R1.raw
1	RPLHPALNQPGGLQPLSFQNPVyHLNNPIPAMPK	Y23;	Replicate 1	Unambiguous	RASAL2	NP_004832.1	9462	ras GTPase-activating protein nGAP isoform 1	2	1	4758808	Y23(Phospho)	1	S(17): 0.0; Y(23): 100.0	1						No Quan Values	Not					27	0.0368092	0	12	4	959.745	3835.96	-1.51	106.48	27087	27087	CAL27_CURCUMIN_pTy_R1.raw
1	RPLEQQQPHHIPTSAPVyQQPQQQPVAQSYGGYK	Y18;	Replicate 1	Unambiguous	LASP1	NP_001258537.1	3927	LIM and SH3 domain protein 1 isoform b	2	1	410444379	Y18(Phospho)	1	T(13): 0.0; S(14): 0.0; Y(18): 100.0; S(29): 0.0; Y(30): 0.0; Y(33): 0.0	1	4311			11120000	Light	Redundant	Not	4.17	3383000	643800		25	0.064909	0	10	4	992.235	3965.92	2.7	57	13851	13851	CAL27_CURCUMIN_pTy_R1.raw
1	DPHYQDPHSTAVGNPEyLNTVQPTCVNSTFDSPAHWAQK	Y17;	Replicate 1	Unambiguous	EGFR	NP_005219.2	1956	epidermal growth factor receptor isoform a precursor	1	1	29725609	Y17(Phospho); C25(Carbamidomethyl)	1	Y(4): 0.0; S(9): 0.0; T(10): 0.0; Y(17): 100.0; T(20): 0.0; T(24): 0.0; S(28): 0.0; T(29): 0.0; S(32): 0.0	1	8526			74330000	Light	Redundant	Not	1.765	74330000	33410000		28	0.0480336	0	1	4	1123	4488.96	0.73	83.27	20861	20861	CAL27_CURCUMIN_pTy_R1.raw
2	MAGFDGSAWDEEEEEPPDHQyyNDFPGKEPPLGGVVDMR	Y21; Y22;	Replicate 1	Unambiguous	SHC1	NP_001189788.1	6464	SHC-transforming protein 1 isoform 5 precursor	5	1	322302755	S7(Phospho); Y22(Phospho)	1	S(7): 0.0; Y(21): 100.0; Y(22): 100.0	1	12320			139600000	Light	Redundant	Not	1.237	139600000	89500000		31	0.017719	1	0	3	1524.28	4570.83	1.63	107.2	27280	27280	CAL27_CURCUMIN_pTy_R1.raw
2	MAGFDGSAWDEEEEEPPDHQyyNDFPGKEPPLGGVVDMR	Y21; Y22;	Replicate 1	Unambiguous	SHC1	NP_001189788.1	6464	SHC-transforming protein 1 isoform 5 precursor	5	1	322302755	Y21(Phospho); Y22(Phospho); K28(Label:13C(6)); R39(Label:13C(6))	1	S(7): 0.0; Y(21): 100.0; Y(22): 100.0	1	12320			126300000	Heavy	Redundant	Not	1.237	139600000	89500000		38	0.00385841	1	0	3	1528.29	4582.86	0.99	107.58	27383	27383	CAL27_CURCUMIN_pTy_R1.raw
1	NSNSyGIPEPAHAYAQPQTTTPLPAVSGSPGAAITPLPSTQNGPVFAK	Y5;	Replicate 1	Unambiguous	CRKL	NP_005198.1	1399	crk-like protein	1	1	4885153	Y14(Phospho)	1	S(2): 0.0; S(4): 0.0; Y(5): 98.0; Y(14): 1.9; T(19): 0.0; T(20): 0.0; T(21): 0.0; S(27): 0.0; S(29): 0.0; T(35): 0.0; S(39): 0.0; T(40): 0.0	1	10606			16860000	Light	Redundant	Not	0.955	16860000	14020000		23	0.097265	0	0	4	1221.35	4882.37	0.33	96.44	24392	24392	CAL27_CURCUMIN_pTy_R1.raw
1	NSNSyGIPEPAHAYAQPQTTTPLPAVSGSPGAAITPLPSTQNGPVFAK	Y5;	Replicate 1	Unambiguous	CRKL	NP_005198.1	1399	crk-like protein	1	1	4885153	Y14(Phospho)	1	S(2): 0.0; S(4): 0.0; Y(5): 98.0; Y(14): 1.9; T(19): 0.0; T(20): 0.0; T(21): 0.0; S(27): 0.0; S(29): 0.0; T(35): 0.0; S(39): 0.0; T(40): 0.0	1	11618			2567000000	Light	Unique	Used	1.784	2157000000	959000000		22	0.124439	0	8	5	977.281	4882.38	0.81	102.63	26054	26054	CAL27_CURCUMIN_pTy_R1.raw
1	NSNSyGIPEPAHAYAQPQTTTPLPAVSGSPGAAITPLPSTQNGPVFAK	Y5;	Replicate 1	Unambiguous	CRKL	NP_005198.1	1399	crk-like protein	1	1	4885153	Y14(Phospho); S29(Phospho)	1	S(2): 0.0; S(4): 0.0; Y(5): 98.0; Y(14): 1.9; T(19): 0.0; T(20): 0.0; T(21): 0.0; S(27): 0.0; S(29): 0.0; T(35): 0.0; S(39): 0.0; T(40): 0.0	1				426500000		No Quan Values	Not					31	0.0153707	0	0	4	1241.34	4962.35	2.88	102.51	26023	26023	CAL27_CURCUMIN_pTy_R1.raw
1	YSTGSDSASFPHTTPSMCLNPDLEGPPLEAYTIQGQyAIPQPDLTK	Y37;	Replicate 1	Unambiguous	PCBP2	NP_001122383.1	5094	poly(rC)-binding protein 2 isoform d	4	1	193083108	C18(Carbamidomethyl); Y37(Phospho)	1	Y(1): 0.0; S(2): 0.0; T(3): 0.0; S(5): 0.0; S(7): 0.0; S(9): 0.0; T(13): 0.0; T(14): 0.0; S(16): 0.0; Y(31): 2.0; T(32): 2.0; Y(37): 96.1; T(45): 0.0	1	13647			26460000	Light	Unique	Used	3.521	26460000	5964000		23	0.109752	0	0	4	1269.58	5075.32	3.37	115.04	29386	29386	CAL27_CURCUMIN_pTy_R1.raw
1	YRPASASVSALIGGNQEGSHPQPLGGPEPGPyAQPSVNTPLPNLQNGPIYAR	Y32;	Replicate 1	Unambiguous	CRK	NP_058431.2	1398	adapter molecule crk isoform a	1	1	41327712	Y32(Phospho)	1	Y(1): 0.0; S(5): 0.0; S(7): 0.0; S(9): 0.0; S(19): 0.0; Y(32): 98.2; S(36): 1.8; T(39): 0.0; Y(50): 0.0	1	11891			3305000000	Light	Redundant	Not	1.962	2902000000	1174000000		35	0.00680701	0	0	5	1081.13	5401.64	0.91	105.25	26757	26757	CAL27_CURCUMIN_pTy_R1.raw
1	YRPASASVSALIGGNQEGSHPQPLGGPEPGPyAQPSVNTPLPNLQNGPIYAR	Y32;	Replicate 1	Unambiguous	CRK	NP_058431.2	1398	adapter molecule crk isoform a	1	1	41327712	Y32(Phospho)	1	Y(1): 0.0; S(5): 0.0; S(7): 0.0; S(9): 0.0; S(19): 0.0; Y(32): 98.2; S(36): 1.8; T(39): 0.0; Y(50): 0.0	1	11999			944200000	Light	Unique	Used	2.174	580200000	211800000		29	0.0254072	0	9	6	901.114	5401.65	1.1	104.97	26683	26683	CAL27_CURCUMIN_pTy_R1.raw
1	YRPASASVSALIGGNQEGSHPQPLGGPEPGPyAQPSVNTPLPNLQNGPIYAR	Y32;	Replicate 1	Unambiguous	CRK	NP_058431.2	1398	adapter molecule crk isoform a	1	1	41327712	Y32(Phospho)	1	Y(1): 0.0; S(5): 0.0; S(7): 0.0; S(9): 0.0; S(19): 0.0; Y(32): 98.2; S(36): 1.8; T(39): 0.0; Y(50): 0.0	1	11891			3305000000	Light	Redundant	Not	1.962	2902000000	1174000000		32	0.01156	0	0	5	1081.14	5401.65	1.25	104.21	26479	26479	CAL27_CURCUMIN_pTy_R1.raw
1	YRPASASVSALIGGNQEGSHPQPLGGPEPGPyAQPSVNTPLPNLQNGPIYAR	Y32;	Replicate 1	Unambiguous	CRK	NP_058431.2	1398	adapter molecule crk isoform a	1	1	41327712	Y32(Phospho)	1	Y(1): 0.0; S(5): 0.0; S(7): 0.0; S(9): 0.0; S(19): 0.0; Y(32): 98.2; S(36): 1.8; T(39): 0.0; Y(50): 0.0	1	11866			8125000000	Light	Redundant	Not	1.847	7630000000	3279000000		33	0.00914022	0	0	4	1351.17	5401.65	1.37	104.76	26625	26625	CAL27_CURCUMIN_pTy_R1.raw
1	HGNRNSNSYGIPEPAHAyAQPQTTTPLPAVSGSPGAAITPLPSTQNGPVFAK	Y18;	Replicate 1	Unambiguous	CRKL	NP_005198.1	1399	crk-like protein	1	1	4885153	S6(Phospho); Y18(Phospho)	1	S(6): 33.3; S(8): 33.3; Y(9): 33.3; Y(18): 99.8; T(23): 0.1; T(24): 0.1; T(25): 0.1; S(31): 0.0; S(33): 0.0; T(39): 0.0; S(43): 0.0; T(44): 0.0	1	10625			456700000	Light	Redundant	Not	0.693	359100000	411300000		24	0.078155	1	0	4	1357.4	5426.56	0.23	97.24	24607	24607	CAL27_CURCUMIN_pTy_R1.raw
1	YRPASASVSALIGGNQEGSHPQPLGGPEPGPyAQPSVNTPLPNLQNGPIYAR	Y32;	Replicate 1	Unambiguous	CRK	NP_058431.2	1398	adapter molecule crk isoform a	1	1	41327712	Y32(Phospho); Y50(Phospho)	1	Y(1): 0.0; S(5): 0.0; S(7): 0.0; S(9): 0.0; S(19): 0.0; Y(32): 98.2; S(36): 1.8; T(39): 0.0; Y(50): 0.0	1	11734	1		2590000	Light	Excluded by Method	Not	100	667200	5315		22	0.140267	0	3	5	1097.13	5481.6	-0.2	103.32	26239	26239	CAL27_CURCUMIN_pTy_R1.raw
1	SSSSDEEYIyMNK	Y10;	Replicate 1	Unambiguous	AFAP1L2	NP_115939.1	84632	actin filament-associated protein 1-like 2 isoform 2	3	1	24308338	Y10(Phospho)	1	S(1): 0.0; S(2): 0.0; S(3): 0.0; S(4): 0.0; Y(8): 0.0; Y(10): 100.0	1	3583		1	4245000	Light	Excluded by Method	Not	6.57676	1422000	171600	2.9			0	53	2	816.81	1632.61	-0.29	52.67	12690	12690	CAL27_CURCUMIN_pTy_R1.raw
1	SSSAGGQGSyVPLLR	Y10;	Replicate 1	Unambiguous	LSR	NP_001247419.1	51599	lipolysis-stimulated lipoprotein receptor isoform 5	5	1	386781463	Y10(Phospho)	1	S(1): 0.0; S(2): 0.0; S(3): 0.0; S(9): 0.6; Y(10): 99.4	1	5556			16440000	Light	Unique	Used	4.178	16440000	3122000	4.08			0	7	2	779.867	1558.73	-0.11	64.73	15912	15912	CAL27_CURCUMIN_pTy_R1.raw
1	SSSAGGQGSyVPLLR	Y10;	Replicate 1	Unambiguous	LSR	NP_001247419.1	51599	lipolysis-stimulated lipoprotein receptor isoform 5	5	1	386781463	Y10(Phospho); R15(Label:13C(6))	1	S(1): 0.0; S(2): 0.0; S(3): 0.0; S(9): 0.7; Y(10): 99.3	1	5556			3122000	Heavy	Redundant	Not	4.178	16440000	3122000	2.36			0	21	2	782.876	1564.75	-0.49	64.46	15839	15839	CAL27_CURCUMIN_pTy_R1.raw
1	SSSAGGQGSyVPLLR	Y10;	Replicate 1	Unambiguous	LSR	NP_001247419.1	51599	lipolysis-stimulated lipoprotein receptor isoform 5	5	1	386781463	Y10(Phospho)	1	S(1): 0.0; S(2): 0.0; S(3): 0.0; S(9): 0.8; Y(10): 99.2	1	5503			17880000	Light	Unique	Used	4.888	17880000	2902000	2.63			0	20	2	779.866	1558.72	-1.29	64.15	15755	15755	CAL27_CURCUMIN_pTy_R1.raw
1	SSGSGSSVADERVDyVVVDQQK	Y15;	Replicate 1	Unambiguous	GAB1	NP_002030.2	2549	GRB2-associated-binding protein 1 isoform b	2	1	46370073	R12(Label:13C(6)); Y15(Phospho); K22(Label:13C(6))	1	S(1): 0.0; S(2): 0.0; S(4): 0.0; S(6): 0.0; S(7): 0.0; Y(15): 100.0	1	4094			24710000	Heavy	Redundant	Not	0.715	22270000	24710000	4.91			1	24	3	802.039	2404.1	-1.41	55.79	13526	13526	CAL27_CURCUMIN_pTy_R1.raw
1	SSGSGSSVADERVDyVVVDQQK	Y15;	Replicate 1	Unambiguous	GAB1	NP_002030.2	2549	GRB2-associated-binding protein 1 isoform b	2	1	46370073	Y15(Phospho)	1	S(1): 0.0; S(2): 0.0; S(4): 0.0; S(6): 0.0; S(7): 0.0; Y(15): 100.0	1	4094			22270000	Light	Unique	Used	0.715	22270000	24710000	5.44			1	27	3	798.027	2392.07	-0.59	55.81	13530	13530	CAL27_CURCUMIN_pTy_R1.raw
1	SSFSHySGLK	Y6;	Replicate 1	Unambiguous	SERBP1	NP_001018079.1	26135	plasminogen activator inhibitor 1 RNA-binding protein isoform 3	2	1	66346683	Y6(Phospho)	1	S(1): 0.0; S(2): 0.0; S(4): 0.0; Y(6): 99.5; S(7): 0.5	1	1739			14750000	Light	Unique	Used	5.427	12950000	1894000	2.49			0	52	2	596.755	1192.5	-0.81	40.75	9489	9489	CAL27_CURCUMIN_pTy_R1.raw
1	SSTETCySAIPK	Y7;	Replicate 1	Unambiguous	FLNB	NP_001157791.1	2317	filamin-B isoform 4	4	1	256222415	C6(Carbamidomethyl); Y7(Phospho)	1	S(1): 0.0; S(2): 0.0; T(3): 0.0; T(5): 0.0; Y(7): 99.1; S(8): 0.9	1	1178			13820000	Light	Redundant	Not	12.343	11560000	743100	2.01			0	0	2	712.295	1423.58	0.58	36.85	8432	8432	CAL27_CURCUMIN_pTy_R1.raw
1	SSLyEGLEKPESR	Y4;	Replicate 1	Unambiguous	ATP2B2	NP_001674.2	491	plasma membrane calcium-transporting ATPase 2 isoform 2	3	1	48255949	S2(Phospho)	1	S(1): 0.0; S(2): 0.0; Y(4): 100.0; S(12): 0.0	1	3098	1		8971000	Light	Excluded by Method	Not	100	4565000	5315	2.23			0	0	2	787.859	1574.71	0.95	49.68	11889	11889	CAL27_CURCUMIN_pTy_R1.raw
1	SSLyEGLEKPESR	Y4;	Replicate 1	Unambiguous	ATP2B2	NP_001674.2	491	plasma membrane calcium-transporting ATPase 2 isoform 2	3	1	48255949	Y4(Phospho)	1	S(1): 0.0; S(2): 0.0; Y(4): 100.0; S(12): 0.0	1	3117		1	3558000	Light	Excluded by Method	Not	3.60922	1719000	378000	2.86			0	62	3	525.574	1574.71	-0.88	49.79	11917	11917	CAL27_CURCUMIN_pTy_R1.raw
1	SSGPYGGGGQyFAKPR	Y11;	Replicate 1	Unambiguous	HNRNPA1	NP_002127.1	3178	heterogeneous nuclear ribonucleoprotein A1 isoform a	2	1	4504445	Y11(Phospho)	1	S(1): 0.0; S(2): 0.0; Y(5): 0.0; Y(11): 100.0	1	2453			20770000	Light	Redundant	Not	7.213	16100000	1772000	2			0	0	2	854.879	1708.75	1.07	45.44	10753	10753	CAL27_CURCUMIN_pTy_R1.raw
1	SSGPYGGGGQyFAKPR	Y11;	Replicate 1	Unambiguous	HNRNPA1	NP_002127.1	3178	heterogeneous nuclear ribonucleoprotein A1 isoform a	2	1	4504445	Y11(Phospho)	1	S(1): 0.0; S(2): 0.0; Y(5): 0.0; Y(11): 100.0	1	2471		1	35760000	Light	Excluded by Method	Not	4.98227	15600000	2485000	4.37			0	26	3	570.254	1708.75	0.06	45.57	10788	10788	CAL27_CURCUMIN_pTy_R1.raw
1	SSGPYGGGGQyFAKPR	Y11;	Replicate 1	Unambiguous	HNRNPA1	NP_002127.1	3178	heterogeneous nuclear ribonucleoprotein A1 isoform a	2	1	4504445	Y11(Phospho); K14(Label:13C(6)); R16(Label:13C(6))	1	S(1): 0.0; S(2): 0.0; Y(5): 0.0; Y(11): 100.0	1	2471		1	2485000	Heavy	Excluded by Method	Not	4.98227	15600000	2485000	2.71			0	57	3	574.268	1720.79	1.14	45.77	10841	10841	CAL27_CURCUMIN_pTy_R1.raw
1	SSGPYGGGGQyFAKPR	Y11;	Replicate 1	Unambiguous	HNRNPA1	NP_002127.1	3178	heterogeneous nuclear ribonucleoprotein A1 isoform a	2	1	4504445	Y11(Phospho)	1	S(1): 0.0; S(2): 0.0; Y(5): 0.0; Y(11): 100.0	1	2453			20770000	Light	Unique	Used	7.213	16100000	1772000	2.62			0	0	2	854.878	1708.75	0.86	45.99	10900	10900	CAL27_CURCUMIN_pTy_R1.raw
1	SSGPYGGGGQyFAKPR	Y11;	Replicate 1	Unambiguous	HNRNPA1	NP_002127.1	3178	heterogeneous nuclear ribonucleoprotein A1 isoform a	2	1	4504445	Y11(Phospho)	1	S(1): 0.0; S(2): 0.0; Y(5): 0.0; Y(11): 100.0	1	2471		1	35760000	Light	Excluded by Method	Not	4.98227	15600000	2485000	3.47			0	29	3	570.254	1708.75	-0.26	46.12	10935	10935	CAL27_CURCUMIN_pTy_R1.raw
1	SSGPyGGGGQYFAKPR	Y5;	Replicate 1	Unambiguous	HNRNPA1	NP_002127.1	3178	heterogeneous nuclear ribonucleoprotein A1 isoform a	2	1	4504445	Y5(Phospho)	1	S(1): 0.0; S(2): 0.0; Y(5): 100.0; Y(11): 0.0	1	2323		1	135100000	Light	Excluded by Method	Not	15.148	55370000	2901000	4.75			0	18	3	570.254	1708.75	0.17	44.48	10491	10491	CAL27_CURCUMIN_pTy_R1.raw
1	SSGPyGGGGQYFAKPR	Y5;	Replicate 1	Unambiguous	HNRNPA1	NP_002127.1	3178	heterogeneous nuclear ribonucleoprotein A1 isoform a	2	1	4504445	Y5(Phospho)	1	S(1): 0.0; S(2): 0.0; Y(5): 100.0; Y(11): 0.0	1	2291			58180000	Light	Redundant	Not	14.259	46440000	2585000	3.52			0	0	2	854.878	1708.75	1	44.82	10584	10584	CAL27_CURCUMIN_pTy_R1.raw
1	SSGPyGGGGQYFAKPR	Y5;	Replicate 1	Unambiguous	HNRNPA1	NP_002127.1	3178	heterogeneous nuclear ribonucleoprotein A1 isoform a	2	1	4504445	Y5(Phospho)	1	S(1): 0.0; S(2): 0.0; Y(5): 100.0; Y(11): 0.0	1	2323		1	135100000	Light	Excluded by Method	Not	15.148	55370000	2901000	3.25			0	37	3	570.254	1708.75	-0.26	45.02	10639	10639	CAL27_CURCUMIN_pTy_R1.raw
1	SVSSSPWLPQDGFDPSDyAEPMDAVVKPR	Y18;	Replicate 1	Unambiguous	ARHGAP35	NP_004482.4	2909	rho GTPase-activating protein 35	1	1	150417981	Y18(Phospho)	1	S(1): 0.0; S(3): 0.0; S(4): 0.0; S(5): 0.0; S(16): 0.0; Y(18): 100.0	1	12753			57150000	Light	Unique	Used	0.95	57150000	47710000	6.63			0	2	3	1086.49	3257.45	0.59	109.56	27914	27914	CAL27_CURCUMIN_pTy_R1.raw
1	SVSSSPWLPQDGFDPSDyAEPMDAVVKPR	Y18;	Replicate 1	Unambiguous	ARHGAP35	NP_004482.4	2909	rho GTPase-activating protein 35	1	1	150417981	Y18(Phospho); K27(Label:13C(6)); R29(Label:13C(6))	1	S(1): 0.0; S(3): 0.0; S(4): 0.0; S(5): 0.0; S(16): 1.0; Y(18): 99.0	1	12753			66630000	Heavy	Redundant	Not	0.95	57150000	47710000	5.44			0	5	3	1090.5	3269.49	0.14	109.8	27979	27979	CAL27_CURCUMIN_pTy_R1.raw
1	SVSSSPWLPQDGFDPSDyAEPMDAVVKPR	Y18;	Replicate 1	Unambiguous	ARHGAP35	NP_004482.4	2909	rho GTPase-activating protein 35	1	1	150417981	Y18(Phospho)	1	S(1): 0.0; S(3): 0.0; S(4): 0.0; S(5): 0.0; S(16): 1.1; Y(18): 98.9	1	12671			217100000	Light	Redundant	Not	1.245	157000000	100000000	4.84			0	16	3	1086.49	3257.46	2.27	109.02	27770	27770	CAL27_CURCUMIN_pTy_R1.raw
1	SVSSSPWLPQDGFDPSDyAEPMDAVVKPR	Y18;	Replicate 1	Unambiguous	ARHGAP35	NP_004482.4	2909	rho GTPase-activating protein 35	1	1	150417981	Y18(Phospho); K27(Label:13C(6)); R29(Label:13C(6))	1	S(1): 0.0; S(3): 0.0; S(4): 0.0; S(5): 0.0; S(16): 1.1; Y(18): 98.9	1	12671			100000000	Heavy	Unique	Used	1.245	157000000	100000000	4.9			0	44	3	1090.5	3269.49	-1.42	109.07	27781	27781	CAL27_CURCUMIN_pTy_R1.raw
1	SDSASSEPVGIyQGFEK	Y12;	Replicate 1	Unambiguous	PRKCD	NP_997704.1	5580	protein kinase C delta type	1	1	47157325	Y12(Phospho); K17(Label:13C(6))	1	S(1): 0.0; S(3): 0.0; S(5): 0.0; S(6): 0.0; Y(12): 100.0	1	5037			9536000	Heavy	Redundant	Not	2.073	24920000	9536000	3.42			0	0	2	943.913	1886.82	1.9	61.32	15000	15000	CAL27_CURCUMIN_pTy_R1.raw
1	SDSASSEPVGIyQGFEK	Y12;	Replicate 1	Unambiguous	PRKCD	NP_997704.1	5580	protein kinase C delta type	1	1	47157325	Y12(Phospho)	1	S(1): 0.0; S(3): 0.0; S(5): 0.0; S(6): 0.0; Y(12): 100.0	1	5037			27110000	Light	Unique	Used	2.073	24920000	9536000	3.98			0	3	2	940.902	1880.8	1.32	61.38	15014	15014	CAL27_CURCUMIN_pTy_R1.raw
1	SFSTAsAITPSVSR	S6;	Replicate 1	Unambiguous	KRT5	NP_000415.2	3852	keratin, type II cytoskeletal 5	1	1	119395754	S6(Phospho); R14(Label:13C(6))	1	S(1): 0.0; S(3): 0.0; T(4): 0.0; S(6): 100.0; T(9): 0.0; S(11): 0.0; S(13): 0.0	1	4887		1	1853000	Heavy	Excluded by Method	Not	0.690344	846000	972600	2.84			0	22	2	748.858	1496.71	0.28	60.48	14773	14773	CAL27_CURCUMIN_pTy_R1.raw
1	SVSPTTEMVSNESVDyR	Y16;	Replicate 1	Unambiguous	MET	NP_000236.2	4233	hepatocyte growth factor receptor isoform b precursor	2	1	42741655	Y16(Phospho)	1	S(1): 0.0; S(3): 0.0; T(5): 0.0; T(6): 0.0; S(10): 0.0; S(13): 0.0; Y(16): 100.0	1	4239			7492000	Light	Redundant	Not	1.217	7492000	4884000	2.08			0	18	2	990.92	1980.83	4.02	56.59	13739	13739	CAL27_CURCUMIN_pTy_R1.raw
1	SVSPTTEMVSNESVDyR	Y16;	Replicate 1	Unambiguous	MET	NP_000236.2	4233	hepatocyte growth factor receptor isoform b precursor	2	1	42741655	Y16(Phospho); R17(Label:13C(6))	1	S(1): 0.0; S(3): 0.0; T(5): 0.0; T(6): 0.0; S(10): 0.0; S(13): 0.0; Y(16): 100.0	1	4239			4884000	Heavy	Unique	Used	1.217	7492000	4884000	2.43			0	0	2	993.927	1986.85	0.14	56.74	13780	13780	CAL27_CURCUMIN_pTy_R1.raw
1	SGSySYLEER	Y4;	Replicate 1	Unambiguous	PPP1R12A	NP_001137358.1	4659	protein phosphatase 1 regulatory subunit 12A isoform b	4	1	219842214	Y4(Phospho)	1	S(1): 0.0; S(3): 0.0; Y(4): 100.0; S(5): 0.0; Y(6): 0.0	1	2513	1		980600	Light	Excluded by Method	Not	100	803400	5315	1.91			0	38	2	635.753	1270.5	0.05	45.83	10857	10857	CAL27_CURCUMIN_pTy_R1.raw
1	SESVVyADIR	Y6;	Replicate 1	Unambiguous	MPZL1	NP_003944.1	9019	myelin protein zero-like protein 1 isoform a precursor	2	1	4506357	Y6(Phospho)	1	S(1): 0.0; S(3): 0.0; Y(6): 100.0	1	3300			237700000	Light	Unique	Used	1.082	237700000	174300000	3.01			0	15	2	609.774	1218.54	0.97	51.19	12295	12295	CAL27_CURCUMIN_pTy_R1.raw
1	SESVVyADIR	Y6;	Replicate 1	Unambiguous	MPZL1	NP_003944.1	9019	myelin protein zero-like protein 1 isoform a precursor	2	1	4506357	Y6(Phospho); R10(Label:13C(6))	1	S(1): 0.0; S(3): 0.0; Y(6): 100.0	1	3300			174300000	Heavy	Redundant	Not	1.082	237700000	174300000	2.46			0	6	2	612.784	1224.56	-0.03	51.4	12351	12351	CAL27_CURCUMIN_pTy_R1.raw
1	SESVVyADIR	Y6;	Replicate 1	Unambiguous	MPZL1	NP_003944.1	9019	myelin protein zero-like protein 1 isoform a precursor	2	1	4506357	Y6(Phospho); R10(Label:13C(6))	1	S(1): 0.0; S(3): 0.9; Y(6): 99.1	1	3300			174300000	Heavy	Redundant	Not	1.082	237700000	174300000	1.94			0	44	2	612.783	1224.56	-1.12	50.84	12201	12201	CAL27_CURCUMIN_pTy_R1.raw
1	SAFSNLFGGEPLSyTR	Y14;	Replicate 1	Unambiguous	TFRC	NP_003225.2	7037	transferrin receptor protein 1	1	1	189458817	Y14(Phospho)	1	S(1): 0.0; S(4): 0.0; S(13): 0.7; Y(14): 98.7; T(15): 0.7	1	12517			120900000	Light	Redundant	Not	0.997	112500000	89470000	3.44			0	7	2	913.411	1825.81	-1.07	108.66	27673	27673	CAL27_CURCUMIN_pTy_R1.raw
1	SLPSGSHQGPVIyAQLDHSGGHHSDK	Y13;	Replicate 1	Unambiguous	MPZL1	NP_003944.1	9019	myelin protein zero-like protein 1 isoform a precursor	1	1	4506357	Y13(Phospho)	1	S(1): 0.0; S(4): 0.0; S(6): 0.0; Y(13): 100.0; S(19): 0.0; S(24): 0.0	1	3007			8465000	Light	Unique	Used	1.567	8465000	4286000	3.11			0	0	3	931.093	2791.27	2.35	49.02	11712	11712	CAL27_CURCUMIN_pTy_R1.raw
1	SAVSPDLHITPIyEGR	Y13;	Replicate 1	Unambiguous	PKP4	NP_001005476.1	8502	plakophilin-4 isoform b	2	1	53829376	Y13(Phospho)	1	S(1): 0.0; S(4): 0.0; T(10): 0.0; Y(13): 100.0	1	7017		1	1624000	Light	Excluded by Method	Not	1.09205	558100	405600	2.47			0	61	3	612.296	1834.87	0.26	73.46	18248	18248	CAL27_CURCUMIN_pTy_R1.raw
1	SLPSGSHQGPVIyAQLDHSGGHHSDKINK	Y13;	Replicate 1	Unambiguous	MPZL1	NP_003944.1	9019	myelin protein zero-like protein 1 isoform a precursor	1	1	4506357	Y13(Phospho)	1	S(1): 0.0; S(4): 1.6; S(6): 0.0; Y(13): 98.3; S(19): 0.0; S(24): 0.0	1	2995			77780000	Light	Unique	Used	0.713	77780000	86610000	4.67			1	18	4	787.376	3146.48	1.14	48.99	11704	11704	CAL27_CURCUMIN_pTy_R1.raw
1	SLPSGSHQGPVIyAQLDHSGGHHSDKINK	Y13;	Replicate 1	Unambiguous	MPZL1	NP_003944.1	9019	myelin protein zero-like protein 1 isoform a precursor	1	1	4506357	Y13(Phospho); K26(Label:13C(6)); K29(Label:13C(6))	1	S(1): 0.0; S(4): 1.8; S(6): 0.0; Y(13): 98.2; S(19): 0.0; S(24): 0.0	1	2995			116200000	Heavy	Redundant	Not	0.713	77780000	86610000	3.93			1	3	4	790.385	3158.52	-0.48	48.92	11685	11685	CAL27_CURCUMIN_pTy_R1.raw
1	SPPESESEPyTFSHPNNGDVSSK	Y10;	Replicate 1	Unambiguous	CDCP1	NP_073753.3	64866	CUB domain-containing protein 1 isoform 1 precursor	1	1	30410805	Y10(Phospho); K23(Label:13C(6))	1	S(1): 0.0; S(5): 0.0; S(7): 0.0; Y(10): 98.4; T(11): 0.8; S(13): 0.8; S(21): 0.0; S(22): 0.0	1	2504			15060000	Heavy	Redundant	Not	3.197	60700000	15060000	2.59			0	10	3	860.029	2578.07	0.41	46.09	10925	10925	CAL27_CURCUMIN_pTy_R1.raw
1	SPPESESEPyTFSHPNNGDVSSK	Y10;	Replicate 1	Unambiguous	CDCP1	NP_073753.3	64866	CUB domain-containing protein 1 isoform 1 precursor	1	1	30410805	Y10(Phospho); K23(Label:13C(6))	1	S(1): 0.0; S(5): 0.0; S(7): 0.9; Y(10): 97.2; T(11): 0.9; S(13): 0.9; S(21): 0.0; S(22): 0.0	1	2504			15060000	Heavy	Redundant	Not	3.197	60700000	15060000	2.5			0	12	3	860.028	2578.07	-0.3	46.8	11117	11117	CAL27_CURCUMIN_pTy_R1.raw
1	SFLDSGyR	Y7;	Replicate 1	Unambiguous	VCL	NP_003364.1	7414	vinculin isoform VCL	2	1	4507877	Y7(Phospho)	1	S(1): 0.0; S(5): 0.0; Y(7): 100.0	1	3332			71020000	Light	Unique	Used	1.369	71020000	41160000	2.39			0	56	2	512.71	1024.41	0.04	51.06	12261	12261	CAL27_CURCUMIN_pTy_R1.raw
1	SFLDSGyR	Y7;	Replicate 1	Unambiguous	VCL	NP_003364.1	7414	vinculin isoform VCL	2	1	4507877	Y7(Phospho)	1	S(1): 0.0; S(5): 0.7; Y(7): 99.3	1	3332			71020000	Light	Redundant	Not	1.369	71020000	41160000	2.09			0	34	2	512.71	1024.41	-0.2	51.62	12412	12412	CAL27_CURCUMIN_pTy_R1.raw
1	STTNyVDFYSTK	Y5;	Replicate 1	Unambiguous	PKP4	NP_001005476.1	8502	plakophilin-4 isoform b	2	1	53829376	Y5(Phospho)	1	S(1): 0.0; T(2): 0.0; T(3): 0.0; Y(5): 100.0; Y(9): 0.0; S(10): 0.0; T(11): 0.0	1	4730			25570000	Light	Unique	Used	1.246	25570000	16280000	3.38			0	19	2	753.314	1505.62	0.62	59.52	14517	14517	CAL27_CURCUMIN_pTy_R1.raw
1	STTNyVDFYSTK	Y5;	Replicate 1	Unambiguous	PKP4	NP_001005476.1	8502	plakophilin-4 isoform b	2	1	53829376	Y5(Phospho); K12(Label:13C(6))	1	S(1): 0.0; T(2): 0.0; T(3): 0.0; Y(5): 100.0; Y(9): 0.0; S(10): 0.0; T(11): 0.0	1	4730			16280000	Heavy	Redundant	Not	1.246	25570000	16280000	2.68			0	15	2	756.324	1511.64	0.38	59.9	14619	14619	CAL27_CURCUMIN_pTy_R1.raw
1	STTNyVDFYSTK	Y5;	Replicate 1	Unambiguous	PKP4	NP_001005476.1	8502	plakophilin-4 isoform b	2	1	53829376	Y5(Phospho)	1	S(1): 0.0; T(2): 0.0; T(3): 0.0; Y(5): 100.0; Y(9): 0.0; S(10): 0.0; T(11): 0.0	1	4730			25570000	Light	Redundant	Not	1.246	25570000	16280000	3.18			0	30	2	753.315	1505.62	1.83	60.09	14670	14670	CAL27_CURCUMIN_pTy_R1.raw
1	SFTPDHVVyAR	Y9;	Replicate 1	Unambiguous	PTRF	NP_036364.2	284119	polymerase I and transcript release factor	1	1	42734430	Y9(Phospho)	1	S(1): 0.0; T(3): 0.0; Y(9): 100.0	1	3331			176100000	Light	Unique	Used	4.077	175500000	34170000	3.07			0	4	2	686.308	1371.61	0.15	51.06	12260	12260	CAL27_CURCUMIN_pTy_R1.raw
1	SFTPDHVVyAR	Y9;	Replicate 1	Unambiguous	PTRF	NP_036364.2	284119	polymerase I and transcript release factor	1	1	42734430	Y9(Phospho)	1	S(1): 0.0; T(3): 0.0; Y(9): 100.0	1	3338			29600000	Light	Unique	Used	4.197	28730000	5431000	3.22			0	34	3	457.875	1371.61	0.41	51.11	12273	12273	CAL27_CURCUMIN_pTy_R1.raw
1	SFTPDHVVyAR	Y9;	Replicate 1	Unambiguous	PTRF	NP_036364.2	284119	polymerase I and transcript release factor	1	1	42734430	Y9(Phospho); R11(Label:13C(6))	1	S(1): 0.0; T(3): 0.0; Y(9): 100.0	1	3331			34170000	Heavy	Redundant	Not	4.077	175500000	34170000	3.05			0	21	2	689.319	1377.63	0.25	51.26	12315	12315	CAL27_CURCUMIN_pTy_R1.raw
1	SFTPDHVVyAR	Y9;	Replicate 1	Unambiguous	PTRF	NP_036364.2	284119	polymerase I and transcript release factor	1	1	42734430	Y9(Phospho)	1	S(1): 0.0; T(3): 0.0; Y(9): 100.0	1	3331			176100000	Light	Redundant	Not	4.077	175500000	34170000	2.91			0	2	2	686.308	1371.61	0.24	51.62	12411	12411	CAL27_CURCUMIN_pTy_R1.raw
1	SREEDPTLTEEEISAMySSVNKPGQLVNK	Y17;	Replicate 1	Unambiguous	PAG1	NP_060910.3	55824	phosphoprotein associated with glycosphingolipid-enriched microdomains 1	1	1	63054864	Y17(Phospho)	1	S(1): 0.0; T(7): 0.0; T(9): 0.0; S(14): 0.0; Y(17): 97.8; S(18): 1.1; S(19): 1.1	1	9447			9567000	Light	Unique	Used	2.097	7699000	2914000	5.42			1	17	4	833.641	3331.54	0.54	89.26	22464	22464	CAL27_CURCUMIN_pTy_R1.raw
1	SEQLKPLKTyVDPHTYEDPNQAVLK	Y10;	Replicate 1	Unambiguous	EPHA2	NP_004422.2	1969	ephrin type-A receptor 2 precursor	1	1	32967311	Y10(Phospho)	1	S(1): 0.0; T(9): 1.2; Y(10): 98.8; T(15): 0.0; Y(16): 0.0	1	6246			56690000	Light	Unique	Used	0.785	55490000	56090000	4.8			1	10	4	749.123	2993.47	1.56	68.68	16971	16971	CAL27_CURCUMIN_pTy_R1.raw
1	SEQLKPLKTYVDPHTyEDPNQAVLK	Y16;	Replicate 1	Unambiguous	EPHA2	NP_004422.2	1969	ephrin type-A receptor 2 precursor	1	1	32967311	T9(Phospho); T15(Phospho)	1	S(1): 0.0; T(9): 50.0; Y(10): 50.0; T(15): 1.1; Y(16): 98.9	1	5618			39960000	Light	Unique	Used	0.682	39160000	45550000	5.05			1	5	3	1025.15	3073.44	1.5	64.82	15934	15934	CAL27_CURCUMIN_pTy_R1.raw
1	SNILWDKEHIyDEQPPNVEEWVK	Y11;	Replicate 1	Unambiguous	OCLN	NP_001192184.1	100506658	occludin isoform b precursor	2	1	327478416	Y11(Phospho)	1	S(1): 0.0; Y(11): 100.0	1	11013		1	7536000	Light	Excluded by Method	Not	2.99601	1285000	340400	5.43			1	21	3	983.454	2948.35	-1.07	99.01	25081	25081	CAL27_CURCUMIN_pTy_R1.raw
1	SPLAEHRPDAyQDVSIHGTLPR	Y11;	Replicate 1	Unambiguous	BCAR3	NP_001248338.1	8412	breast cancer anti-estrogen resistance protein 3 isoform 1	1	1	387157909	Y11(Phospho)	1	S(1): 0.0; Y(11): 100.0; S(15): 0.0; T(19): 0.0	1	4551			39270000	Light	Unique	Used	1.629	38720000	18870000	4.96			0	21	4	635.558	2539.21	0.14	58.48	14242	14242	CAL27_CURCUMIN_pTy_R1.raw
1	SPLAEHRPDAyQDVSIHGTLPR	Y11;	Replicate 1	Unambiguous	BCAR3	NP_001248338.1	8412	breast cancer anti-estrogen resistance protein 3 isoform 1	1	1	387157909	R7(Label:13C(6)); Y11(Phospho); R22(Label:13C(6))	1	S(1): 0.0; Y(11): 100.0; S(15): 0.0; T(19): 0.0	1	4551			18870000	Heavy	Redundant	Not	1.629	38720000	18870000	4.6			0	7	4	638.566	2551.24	-2.34	58.49	14245	14245	CAL27_CURCUMIN_pTy_R1.raw
1	SGFEPPGDFPFEDYSQHIyR	Y19;	Replicate 1	Unambiguous	FNBP1L	NP_060207.2	54874	formin-binding protein 1-like isoform 2	3	1	41581463	Y19(Phospho)	1	S(1): 0.0; Y(14): 0.0; S(15): 0.0; Y(19): 100.0	1	11790	1		10700000	Light	Excluded by Method	Not	100	2924000	5315	2.3			0	50	3	823.345	2468.02	-1.51	103.64	26325	26325	CAL27_CURCUMIN_pTy_R1.raw
1	SYEDMIGEEVPSDQYyWAPLAQHER	Y16;	Replicate 1	Unambiguous	CTNND1	NP_001193818.1	1500	catenin delta-1 isoform 2A	15	1	332688218	Y16(Phospho)	1	S(1): 0.0; Y(2): 0.0; S(12): 0.0; Y(15): 0.0; Y(16): 100.0	1	11931	1		75040000	Light	Excluded by Method	Not	100	13650000	5315	5.45			0	81	3	1031.77	3093.3	0.24	104.49	26552	26552	CAL27_CURCUMIN_pTy_R1.raw
1	SYEDMIGEEVPSDQyYWAPLAQHER	Y15;	Replicate 1	Unambiguous	CTNND1	NP_001193818.1	1500	catenin delta-1 isoform 2A	15	1	332688218	Y15(Phospho)	1	S(1): 0.0; Y(2): 0.0; S(12): 0.0; Y(15): 99.2; Y(16): 0.8	1	12191			28910000	Light	Unique	Used	3.907	26460000	5373000	4.28			0	2	3	1031.77	3093.3	1.67	106.15	27000	27000	CAL27_CURCUMIN_pTy_R1.raw
1	SYSPyDMLESIRK	Y5;	Replicate 1	Unambiguous	ANXA2	NP_001002857.1	302	annexin A2 isoform 2	2	1	50845386	Y5(Phospho)	1	S(1): 0.0; Y(2): 0.0; S(3): 0.0; Y(5): 100.0; S(10): 0.0	1				6673000		No Quan Values	Not				1.95			1	30	2	834.871	1668.73	0.35	92.98	23461	23461	CAL27_CURCUMIN_pTy_R1.raw
1	SYSPyDMLESIRK	Y5;	Replicate 1	Unambiguous	ANXA2	NP_001002857.1	302	annexin A2 isoform 2	2	1	50845386	Y5(Phospho)	1	S(1): 0.0; Y(2): 0.0; S(3): 0.0; Y(5): 100.0; S(10): 0.0	1	10058			6797000	Light	Unique	Used	2.515	5474000	1727000	3.08			1	45	3	556.916	1668.73	-0.17	93.13	23501	23501	CAL27_CURCUMIN_pTy_R1.raw
1	SYSPyDMLESIR	Y5;	Replicate 1	Unambiguous	ANXA2	NP_001002857.1	302	annexin A2 isoform 2	2	1	50845386	Y5(Phospho)	1	S(1): 0.0; Y(2): 0.0; S(3): 0.0; Y(5): 100.0; S(10): 0.0	1	11478			130800000	Light	Redundant	Not	1.476	130800000	70350000	2.45			0	34	2	770.824	1540.64	1.65	101.73	25811	25811	CAL27_CURCUMIN_pTy_R1.raw
1	SYSPyDMLESIR	Y5;	Replicate 1	Unambiguous	ANXA2	NP_001002857.1	302	annexin A2 isoform 2	2	1	50845386	Y5(Phospho); R12(Label:13C(6))	1	S(1): 0.0; Y(2): 0.0; S(3): 0.0; Y(5): 100.0; S(10): 0.0	1	11478			71110000	Heavy	Unique	Used	1.476	130800000	70350000	2.91			0	32	2	773.832	1546.66	-1.19	101.8	25831	25831	CAL27_CURCUMIN_pTy_R1.raw
1	SYSPyDMLESIR	Y5;	Replicate 1	Unambiguous	ANXA2	NP_001002857.1	302	annexin A2 isoform 2	2	1	50845386	Y5(Phospho)	1	S(1): 0.0; Y(2): 0.0; S(3): 0.0; Y(5): 100.0; S(10): 0.0	1	11478			130800000	Light	Redundant	Not	1.476	130800000	70350000	2.38			0	7	2	770.824	1540.64	0.94	102.27	25957	25957	CAL27_CURCUMIN_pTy_R1.raw
1	SYSPyDMLESIR	Y5;	Replicate 1	Unambiguous	ANXA2	NP_001002857.1	302	annexin A2 isoform 2	2	1	50845386	Y5(Phospho); R12(Label:13C(6))	1	S(1): 0.0; Y(2): 0.0; S(3): 0.0; Y(5): 100.0; S(10): 0.0	1	11478			71110000	Heavy	Redundant	Not	1.476	130800000	70350000	2.56			0	8	2	773.834	1546.66	0.71	102.4	25992	25992	CAL27_CURCUMIN_pTy_R1.raw
1	SPyAGLQLGAAK	Y3;	Replicate 1	Unambiguous	TRIM29	NP_036233.2	23650	tripartite motif-containing protein 29	1	1	17402909	Y3(Phospho)	1	S(1): 0.0; Y(3): 100.0	1				5439000		No Quan Values	Not				2.79			0	39	2	628.307	1255.61	-0.74	54.82	13267	13267	CAL27_CURCUMIN_pTy_R1.raw
1	SLyNLGGSK	Y3;	Replicate 1	Unambiguous	KRT5	NP_000415.2	3852	keratin, type II cytoskeletal 5	1	1	119395754	Y3(Phospho)	1	S(1): 0.0; Y(3): 100.0; S(8): 0.0	1	1921			20790000	Light	Unique	Used	1.542	20790000	10700000	2.68			0	51	2	509.734	1018.46	-0.27	42.06	9836	9836	CAL27_CURCUMIN_pTy_R1.raw
1	SLyNLGGSK	Y3;	Replicate 1	Unambiguous	KRT5	NP_000415.2	3852	keratin, type II cytoskeletal 5	1	1	119395754	Y3(Phospho); K9(Label:13C(6))	1	S(1): 0.0; Y(3): 100.0; S(8): 0.0	1	1921			10700000	Heavy	Redundant	Not	1.542	20790000	10700000	2.03			0	37	2	512.744	1024.48	0.1	42.12	9852	9852	CAL27_CURCUMIN_pTy_R1.raw
1	SMGYDDLDYGMMSDyGTAR	Y15;	Replicate 1	Unambiguous	CTNND1	NP_001193818.1	1500	catenin delta-1 isoform 2A	15	1	332688218	Y15(Phospho)	1	S(1): 0.0; Y(4): 0.0; Y(9): 0.0; S(13): 0.0; Y(15): 99.0; T(17): 1.0	1	8681		1	32210000	Light	Excluded by Method	Not	4.05039	8926000	1749000	2.35			0	0	2	1114.4	2227.8	0.18	84.83	21275	21275	CAL27_CURCUMIN_pTy_R1.raw
1	SMGYDDLDYGMMSDyGTAR	Y15;	Replicate 1	Unambiguous	CTNND1	NP_001193818.1	1500	catenin delta-1 isoform 2A	15	1	332688218	Y15(Phospho)	1	S(1): 0.0; Y(4): 0.0; Y(9): 0.0; S(13): 0.6; Y(15): 98.9; T(17): 0.6	1	8681		1	32210000	Light	Excluded by Method	Not	4.05039	8926000	1749000	3.19			0	0	2	1114.4	2227.8	-1.13	84.21	21108	21108	CAL27_CURCUMIN_pTy_R1.raw
1	SMGYDDLDyGMMSDYGTAR	Y9;	Replicate 1	Unambiguous	CTNND1	NP_001193818.1	1500	catenin delta-1 isoform 2A	15	1	332688218	Y9(Phospho)	1	S(1): 0.0; Y(4): 0.0; Y(9): 100.0; S(13): 0.0; Y(15): 0.0; T(17): 0.0	1	9238		1	14800000	Light	Excluded by Method	Not	8.13176	5539000	540600	4.52			0	23	2	1114.41	2227.8	0.73	87.89	22094	22094	CAL27_CURCUMIN_pTy_R1.raw
1	SEDIyADPAAYVMR	Y5;	Replicate 1	Unambiguous	PLEKHA6	NP_055750.2	22874	pleckstrin homology domain-containing family A member 6	1	1	37595548	Y5(Phospho)	1	S(1): 0.0; Y(5): 100.0; Y(11): 0.0	1	9165			3229000	Light	Unique	Used	1.55	3229000	1652000	2.31			0	69	2	840.854	1680.7	1.29	87.52	21996	21996	CAL27_CURCUMIN_pTy_R1.raw
1	SQPVyIQYSNHR	Y5;	Replicate 1	Unambiguous	PTBP3	NP_001231825.1	9991	polypyrimidine tract-binding protein 3 isoform 4	6	1	349732186	Y5(Phospho)	1	S(1): 0.0; Y(5): 100.0; Y(8): 0.0; S(9): 0.0	1	2261			6236000	Light	Unique	Used	5.828	5247000	714400	2.92			0	40	3	524.572	1571.7	0.33	44.11	10391	10391	CAL27_CURCUMIN_pTy_R1.raw
1	SAVGHEyVAEVEK	Y7;	Replicate 1	Unambiguous	HCLS1	NP_005326.2	3059	hematopoietic lineage cell-specific protein isoform 1	1	1	167234422	Y7(Phospho)	1	S(1): 0.0; Y(7): 100.0	1	1749	1		7819000	Light	Excluded by Method	Not	100	3845000	5315	2.87			0	0	2	749.336	1497.66	1.21	40.84	9512	9512	CAL27_CURCUMIN_pTy_R1.raw
1	SLDNGGyYISPR	Y7;	Replicate 1	Unambiguous	LYN	NP_001104567.1	4067	tyrosine-protein kinase Lyn isoform B	2	1	162287326	Y7(Phospho)	1	S(1): 0.0; Y(7): 99.5; Y(8): 0.5; S(10): 0.0	1	3987		1	2929000	Light	Excluded by Method	Not	1.53904	1639000	845200	2.45			0	45	2	711.31	1421.61	1.85	55.2	13366	13366	CAL27_CURCUMIN_pTy_R1.raw
1	SyLPQTVR	Y2;	Replicate 1	Unambiguous	IL6ST	NP_001177910.1	3572	interleukin-6 receptor subunit beta isoform 3 precursor	2	1	300244535	Y2(Phospho); R8(Label:13C(6))	1	S(1): 0.4; Y(2): 99.6; T(6): 0.0	1	1904			3369000	Heavy	Unique	Used	1	4247000	3369000	1.94			0	26	2	525.259	1049.51	-1.31	41.95	9807	9807	CAL27_CURCUMIN_pTy_R1.raw
1	SHyADVDPENQNFLLESNLGK	Y3;	Replicate 1	Unambiguous	SLC38A2	NP_061849.2	54407	sodium-coupled neutral amino acid transporter 2	1	1	21361602	Y3(Phospho)	1	S(1): 0.6; Y(3): 99.4; S(17): 0.0	1	8816			58020000	Light	Unique	Used	0.683	56870000	66040000	4.76			0	8	3	824.035	2470.09	-0.57	85.18	21367	21367	CAL27_CURCUMIN_pTy_R1.raw
1	SHyADVDPENQNFLLESNLGKK	Y3;	Replicate 1	Unambiguous	SLC38A2	NP_061849.2	54407	sodium-coupled neutral amino acid transporter 2	1	1	21361602	Y3(Phospho)	1	S(1): 0.7; Y(3): 99.3; S(17): 0.0	1	7665			5023000	Light	Unique	Used	0.752	5023000	5301000	2.58			1	34	3	866.735	2598.19	0.99	77.5	19326	19326	CAL27_CURCUMIN_pTy_R1.raw
1	SHyADVDPENQNFLLESNLGK	Y3;	Replicate 1	Unambiguous	SLC38A2	NP_061849.2	54407	sodium-coupled neutral amino acid transporter 2	1	1	21361602	Y3(Phospho); K21(Label:13C(6))	1	S(1): 0.7; Y(3): 99.3; S(17): 0.0	1	8816			66040000	Heavy	Redundant	Not	0.683	56870000	66040000	4.18			0	4	3	826.043	2476.11	0.4	85.13	21353	21353	CAL27_CURCUMIN_pTy_R1.raw
1	SHyADVDPENQNFLLESNLGK	Y3;	Replicate 1	Unambiguous	SLC38A2	NP_061849.2	54407	sodium-coupled neutral amino acid transporter 2	1	1	21361602	Y3(Phospho); K21(Label:13C(6))	1	S(1): 0.7; Y(3): 99.3; S(17): 0.0	1	8816			66040000	Heavy	Redundant	Not	0.683	56870000	66040000	3.51			0	3	3	826.043	2476.11	0.55	85.75	21520	21520	CAL27_CURCUMIN_pTy_R1.raw
1	SFIKDyPVVSIEDPFDQDDWGAWQK	Y6;	Replicate 1	Unambiguous	ENO1	NP_001419.1	2023	alpha-enolase isoform 1	2	1	4503571	K4(Label:13C(6)); Y6(Phospho); K25(Label:13C(6))	1	S(1): 0.9; Y(6): 99.1; S(10): 0.0	1	14825			20080000	Heavy	Redundant	Not	0.815	20620000	20080000	4.51			1	22	3	1026.47	3077.41	2.86	122.11	31283	31283	CAL27_CURCUMIN_pTy_R1.raw
1	SFIKDyPVVSIEDPFDQDDWGAWQK	Y6;	Replicate 1	Unambiguous	ENO1	NP_001419.1	2023	alpha-enolase isoform 1	2	1	4503571	Y6(Phospho)	1	S(1): 1.0; Y(6): 99.0; S(10): 0.0	1	14825			27670000	Light	Unique	Used	0.815	20620000	20080000	4.98			1	28	3	1022.46	3065.36	-0.9	122.11	31282	31282	CAL27_CURCUMIN_pTy_R1.raw
2	sVSSSPWLPQDGFDPSDyAEPMDAVVKPR	S1; Y18;	Replicate 1	Unambiguous	ARHGAP35	NP_004482.4	2909	rho GTPase-activating protein 35	1	1	150417981	S5(Phospho); S16(Phospho); K27(Label:13C(6)); R29(Label:13C(6))	1	S(1): 100.0; S(3): 0.0; S(4): 0.0; S(5): 0.0; S(16): 1.6; Y(18): 98.4	1	13202			35200000	Heavy	Redundant	Not	1.89	83830000	35200000	3.94			0	59	3	1117.16	3349.46	2.07	112.31	28653	28653	CAL27_CURCUMIN_pTy_R1.raw
1	sVSSSPWLPQDGFDPSDYAEPMDAVVKPR	S1;	Replicate 1	Unambiguous	ARHGAP35	NP_004482.4	2909	rho GTPase-activating protein 35	1	1	150417981	S5(Phospho); S16(Phospho)	1	S(1): 100.0; S(3): 0.0; S(4): 0.0; S(5): 0.0; S(16): 50.0; Y(18): 50.0	1	13202			88360000	Light	Unique	Used	1.89	83830000	35200000	4.83			0	19	3	1113.14	3337.42	0.53	112.4	28678	28678	CAL27_CURCUMIN_pTy_R1.raw
2	sVSSSPWLPQDGFDPSDyAEPMDAVVKPR	S1; Y18;	Replicate 1	Unambiguous	ARHGAP35	NP_004482.4	2909	rho GTPase-activating protein 35	1	1	150417981	S5(Phospho); S16(Phospho)	1	S(1): 98.7; S(3): 1.3; S(4): 0.0; S(5): 0.0; S(16): 1.3; Y(18): 98.7	1	13327			37020000	Light	Unique	Used	2.359	35990000	12110000	3			0	0	3	1113.14	3337.41	-2.54	113.03	28846	28846	CAL27_CURCUMIN_pTy_R1.raw
1	VVQDFIDIFSDyANFK	Y12;	Replicate 1	Unambiguous	PTPRE	NP_569119.1	5791	receptor-type tyrosine-protein phosphatase epsilon isoform 2	2	1	18860859	Y12(Phospho)	1	S(10): 0.0; Y(12): 100.0	1	15341			8353000	Light	Unique	Used	0.61	8353000	10870000	4.2			0	28	2	1000.96	2000.9	-0.18	125.04	32067	32067	CAL27_CURCUMIN_pTy_R1.raw
1	VVQDFIDIFSDyANFK	Y12;	Replicate 1	Unambiguous	PTPRE	NP_569119.1	5791	receptor-type tyrosine-protein phosphatase epsilon isoform 2	2	1	18860859	Y12(Phospho); K16(Label:13C(6))	1	S(10): 0.0; Y(12): 100.0	1	15365			32530000	Heavy	Unique	Used	0.56	22970000	32530000	3.98			0	2	2	1003.97	2006.92	0.07	125.16	32100	32100	CAL27_CURCUMIN_pTy_R1.raw
1	IINVLAAVKsVGEPK	S10;	Replicate 1	Unambiguous	MEIOB	NP_689977.2	254528	meiosis-specific with OB domain-containing protein isoform 2	2	1	195972894	S10(Phospho); K15(Label:13C(6))	1	S(10): 100.0	1				262600000		Inconsistently Labeled	Not				2.29			1	30	3	541.978	1623.92	1.21	88.16	22168	22168	CAL27_CURCUMIN_pTy_R1.raw
1	IINVLAAVKsVGEPK	S10;	Replicate 1	Unambiguous	MEIOB	NP_689977.2	254528	meiosis-specific with OB domain-containing protein isoform 2	2	1	195972894	S10(Phospho); K15(Label:13C(6))	1	S(10): 100.0	1				262600000		Inconsistently Labeled	Not				2.67			1	8	3	541.978	1623.92	1.32	88.77	22332	22332	CAL27_CURCUMIN_pTy_R1.raw
1	IINVLAAVKsVGEPK	S10;	Replicate 1	Unambiguous	MEIOB	NP_689977.2	254528	meiosis-specific with OB domain-containing protein isoform 2	2	1	195972894	S10(Phospho); K15(Label:13C(6))	1	S(10): 100.0	1						Inconsistently Labeled	Not				2.34			1	6	3	541.978	1623.92	1.43	89.36	22490	22490	CAL27_CURCUMIN_pTy_R1.raw
1	FQDVGPQAPVGSVyQK	Y14;	Replicate 1	Unambiguous	DBNL	NP_001014436.1	28988	drebrin-like protein isoform b	5	1	62198235	Y14(Phospho)	1	S(12): 0.0; Y(14): 100.0	1	4124			78390000	Light	Unique	Used	7.914	72310000	7251000	3.71			0	22	2	900.422	1799.84	0.07	55.96	13572	13572	CAL27_CURCUMIN_pTy_R1.raw
1	FQDVGPQAPVGSVyQK	Y14;	Replicate 1	Unambiguous	DBNL	NP_001014436.1	28988	drebrin-like protein isoform b	5	1	62198235	Y14(Phospho)	1	S(12): 0.0; Y(14): 100.0	1	4166	1		14970000	Light	Excluded by Method	Not	100	5593000	5315	4.26			0	52	3	600.617	1799.84	-0.51	56.19	13632	13632	CAL27_CURCUMIN_pTy_R1.raw
1	VLPPEVADGGVVDSGVyAVPPPAER	Y17;	Replicate 1	Unambiguous	BCAR1	NP_001164190.1	9564	breast cancer anti-estrogen resistance protein 1 isoform 7	9	1	282398123	Y17(Phospho)	1	S(14): 0.0; Y(17): 100.0	1	8306			30020000	Light	Redundant	Not	0.988	15280000	12270000	3.33			0	0	3	857.425	2570.26	2.87	81.73	20459	20459	CAL27_CURCUMIN_pTy_R1.raw
1	VLPPEVADGGVVDSGVyAVPPPAER	Y17;	Replicate 1	Unambiguous	BCAR1	NP_001164190.1	9564	breast cancer anti-estrogen resistance protein 1 isoform 7	9	1	282398123	Y17(Phospho); R25(Label:13C(6))	1	S(14): 0.0; Y(17): 100.0	1	8306			12270000	Heavy	Redundant	Not	0.988	15280000	12270000	3.62			0	29	3	859.431	2576.28	1.52	81.94	20512	20512	CAL27_CURCUMIN_pTy_R1.raw
1	VLPPEVADGGVVDSGVyAVPPPAER	Y17;	Replicate 1	Unambiguous	BCAR1	NP_001164190.1	9564	breast cancer anti-estrogen resistance protein 1 isoform 7	9	1	282398123	Y17(Phospho)	1	S(14): 0.0; Y(17): 100.0	1	8306			30020000	Light	Unique	Used	0.988	15280000	12270000	4.69			0	2	3	857.423	2570.26	0.45	82.32	20615	20615	CAL27_CURCUMIN_pTy_R1.raw
1	VLPPEVADGGVVDSGVyAVPPPAER	Y17;	Replicate 1	Unambiguous	BCAR1	NP_001164190.1	9564	breast cancer anti-estrogen resistance protein 1 isoform 7	9	1	282398123	Y17(Phospho); R25(Label:13C(6))	1	S(14): 0.0; Y(17): 100.0	1	8484			15770000	Heavy	Unique	Used	1.283	25490000	15770000	4.15			0	14	3	859.43	2576.28	0.81	83.01	20790	20790	CAL27_CURCUMIN_pTy_R1.raw
1	VLPPEVADGGVVDSGVyAVPPPAER	Y17;	Replicate 1	Unambiguous	BCAR1	NP_001164190.1	9564	breast cancer anti-estrogen resistance protein 1 isoform 7	9	1	282398123	Y17(Phospho); R25(Label:13C(6))	1	S(14): 0.0; Y(17): 100.0	1	8585			12820000	Heavy	Unique	Used	1.519	24540000	12820000	3.62			0	28	3	859.431	2576.28	1.37	83.65	20957	20957	CAL27_CURCUMIN_pTy_R1.raw
1	VLPPEVADGGVVDSGVyAVPPPAER	Y17;	Replicate 1	Unambiguous	BCAR1	NP_001164190.1	9564	breast cancer anti-estrogen resistance protein 1 isoform 7	9	1	282398123	Y17(Phospho)	1	S(14): 0.0; Y(17): 100.0	1	8585			24820000	Light	Redundant	Not	1.519	24540000	12820000	3.54			0	43	3	857.424	2570.26	1.87	83.83	21007	21007	CAL27_CURCUMIN_pTy_R1.raw
1	RPLHPALNQPGGLQPLSFQNPVyHLNNPIPAMPK	Y23;	Replicate 1	Unambiguous	RASAL2	NP_004832.1	9462	ras GTPase-activating protein nGAP isoform 1	2	1	4758808	Y23(Phospho)	1	S(17): 0.0; Y(23): 100.0	1						No Quan Values	Not				6.02			0	12	4	959.745	3835.96	-1.51	106.48	27087	27087	CAL27_CURCUMIN_pTy_R1.raw
1	VSSTHyYLLPERPPYLDKYEK	Y6;	Replicate 1	Unambiguous	ERRFI1	NP_061821.1	54206	ERBB receptor feedback inhibitor 1	1	1	10047086	Y6(Phospho)	1	S(2): 0.0; S(3): 0.0; T(4): 0.0; Y(6): 98.8; Y(7): 1.2; Y(15): 0.0; Y(19): 0.0	1	7963			300900000	Light	Redundant	Not	5.168	295000000	45290000	4.96			1	2	4	670.329	2678.29	1.43	80.1	20024	20024	CAL27_CURCUMIN_pTy_R1.raw
1	VSSTHyYLLPERPPYLDKYEK	Y6;	Replicate 1	Unambiguous	ERRFI1	NP_061821.1	54206	ERBB receptor feedback inhibitor 1	1	1	10047086	Y6(Phospho)	1	S(2): 0.0; S(3): 0.0; T(4): 0.0; Y(6): 98.8; Y(7): 1.2; Y(15): 0.0; Y(19): 0.0	1	8136			154400000	Light	Unique	Used	5.164	151300000	23240000	4.77			1	2	4	670.329	2678.29	0.89	80.73	20191	20191	CAL27_CURCUMIN_pTy_R1.raw
1	VSSTHYyLLPERPPYLDKYEK	Y7;	Replicate 1	Unambiguous	ERRFI1	NP_061821.1	54206	ERBB receptor feedback inhibitor 1	1	1	10047086	Y6(Phospho)	1	S(2): 0.0; S(3): 0.0; T(4): 1.3; Y(6): 1.3; Y(7): 97.4; Y(15): 0.0; Y(19): 0.0	1	8125			21420000	Light	Unique	Used	4.196	17500000	3310000	3.05			1	16	3	893.436	2678.29	1.71	80.65	20170	20170	CAL27_CURCUMIN_pTy_R1.raw
1	VSSTHyYLLPERPPYLDK	Y6;	Replicate 1	Unambiguous	ERRFI1	NP_061821.1	54206	ERBB receptor feedback inhibitor 1	1	1	10047086	Y6(Phospho)	1	S(2): 0.0; S(3): 0.9; T(4): 0.0; Y(6): 98.3; Y(7): 0.9; Y(15): 0.0	1	8281			5833000	Light	Unique	Used	2.925	5833000	1582000	4.23			0	6	3	753.368	2258.09	0.34	81.59	20422	20422	CAL27_CURCUMIN_pTy_R1.raw
1	VSSTHyYLLPERPPYLDKYEK	Y6;	Replicate 1	Unambiguous	ERRFI1	NP_061821.1	54206	ERBB receptor feedback inhibitor 1	1	1	10047086	Y6(Phospho)	1	S(2): 0.0; S(3): 1.1; T(4): 0.0; Y(6): 97.7; Y(7): 1.1; Y(15): 0.0; Y(19): 0.0	1	7963			300900000	Light	Unique	Used	5.168	295000000	45290000	5.01			1	3	4	670.328	2678.29	0.52	79.53	19869	19869	CAL27_CURCUMIN_pTy_R1.raw
1	VSSTHYyLLPERPPYLDKYEK	Y7;	Replicate 1	Unambiguous	ERRFI1	NP_061821.1	54206	ERBB receptor feedback inhibitor 1	1	1	10047086	Y7(Phospho)	1	S(2): 0.0; S(3): 1.2; T(4): 0.0; Y(6): 1.2; Y(7): 97.7; Y(15): 0.0; Y(19): 0.0	1	8047	1		27930000	Light	Excluded by Method	Not	100	8025000	5315	3.38			1	30	3	893.435	2678.29	0	80.07	20014	20014	CAL27_CURCUMIN_pTy_R1.raw
1	LSHSSGyAQLNTYSR	Y7;	Replicate 1	Unambiguous	KIRREL	NP_001273278.1	55243	kin of IRRE-like protein 1 isoform 2 precursor	2	1	556503362	Y7(Phospho); R15(Label:13C(6))	1	S(2): 0.0; S(4): 0.0; S(5): 0.5; Y(7): 99.5; T(12): 0.0; Y(13): 0.0; S(14): 0.0	1	2042			1736000	Heavy	Unique	Used	2.591	5667000	1736000	2.38			0	0	2	885.402	1769.8	0.6	42.86	10054	10054	CAL27_CURCUMIN_pTy_R1.raw
1	FSISPDEDSSSYSSNSDFNySYPTK	Y20;	Replicate 1	Unambiguous	SLC38A2	NP_061849.2	54407	sodium-coupled neutral amino acid transporter 2	1	1	21361602	Y20(Phospho)	1	S(2): 0.0; S(4): 0.0; S(9): 0.0; S(10): 0.0; S(11): 0.0; Y(12): 0.0; S(13): 0.0; S(14): 0.0; S(16): 0.0; Y(20): 98.8; S(21): 1.2; Y(22): 0.0; T(24): 0.0	1	7516			7708000	Light	Unique	Used	1.642	6481000	3132000	2.29			0	16	3	968.717	2904.14	-1.71	76.48	19055	19055	CAL27_CURCUMIN_pTy_R1.raw
1	NSNSYGIPEPAHAyAQPQTTTPLPAVSGSPGAAITPLPSTQNGPVFAK	Y14;	Replicate 1	Unambiguous	CRKL	NP_005198.1	1399	crk-like protein	1	1	4885153	Y14(Phospho)	1	S(2): 0.0; S(4): 0.0; Y(5): 0.0; Y(14): 100.0; T(19): 0.0; T(20): 0.0; T(21): 0.0; S(27): 0.0; S(29): 0.0; T(35): 0.0; S(39): 0.0; T(40): 0.0	1	10606			16860000	Light	Unique	Used	0.955	16860000	14020000	5.43			0	0	4	1221.35	4882.37	0.33	96.44	24392	24392	CAL27_CURCUMIN_pTy_R1.raw
1	NSNSYGIPEPAHAyAQPQTTTPLPAVSGSPGAAITPLPSTQNGPVFAK	Y14;	Replicate 1	Unambiguous	CRKL	NP_005198.1	1399	crk-like protein	1	1	4885153	S4(Phospho); S27(Phospho)	1	S(2): 0.0; S(4): 0.0; Y(5): 2.2; Y(14): 91.2; T(19): 2.2; T(20): 2.2; T(21): 2.2; S(27): 50.0; S(29): 50.0; T(35): 0.0; S(39): 0.0; T(40): 0.0	1				426500000		No Quan Values	Not				5.47			0	0	4	1241.34	4962.35	2.88	102.51	26023	26023	CAL27_CURCUMIN_pTy_R1.raw
1	NSNSyGIPEPAHAYAQPQTTTPLPAVSGSPGAAITPLPSTQNGPVFAK	Y5;	Replicate 1	Unambiguous	CRKL	NP_005198.1	1399	crk-like protein	1	1	4885153	Y5(Phospho)	1	S(2): 0.0; S(4): 0.1; Y(5): 97.7; Y(14): 2.3; T(19): 0.0; T(20): 0.0; T(21): 0.0; S(27): 0.0; S(29): 0.0; T(35): 0.0; S(39): 0.0; T(40): 0.0	1	11339	1		358900000	Light	Excluded by Method	Not	100	99410000	5315	5.16			0	0	4	1221.35	4882.38	1.23	100.93	25597	25597	CAL27_CURCUMIN_pTy_R1.raw
1	ESMCSTPAFPVSPETPyVK	Y17;	Replicate 1	Unambiguous	TNS3	NP_073585.8	64759	tensin-3	1	1	65288071	C4(Carbamidomethyl); Y17(Phospho)	1	S(2): 0.0; S(5): 0.0; T(6): 0.0; S(12): 0.0; T(15): 0.0; Y(17): 100.0	1	8039			20940000	Light	Redundant	Not	0.863	20730000	19050000	3.11			0	27	3	736.32	2206.95	0.79	80	19996	19996	CAL27_CURCUMIN_pTy_R1.raw
1	ESMCSTPAFPVSPETPyVK	Y17;	Replicate 1	Unambiguous	TNS3	NP_073585.8	64759	tensin-3	1	1	65288071	C4(Carbamidomethyl); Y17(Phospho); K19(Label:13C(6))	1	S(2): 0.0; S(5): 0.0; T(6): 0.0; S(12): 0.0; T(15): 0.0; Y(17): 100.0	1	8039			19050000	Heavy	Unique	Used	0.863	20730000	19050000	3.34			0	3	3	738.326	2212.96	0.46	80.25	20063	20063	CAL27_CURCUMIN_pTy_R1.raw
1	ESMCSTPAFPVSPETPyVK	Y17;	Replicate 1	Unambiguous	TNS3	NP_073585.8	64759	tensin-3	1	1	65288071	C4(Carbamidomethyl); Y17(Phospho); K19(Label:13C(6))	1	S(2): 0.0; S(5): 0.0; T(6): 0.0; S(12): 0.0; T(15): 0.7; Y(17): 99.3	1	8086			11200000	Heavy	Unique	Used	1.202	16970000	11200000	3.13			0	0	2	1106.99	2212.97	0.8	80.42	20107	20107	CAL27_CURCUMIN_pTy_R1.raw
1	ESMCSTPAFPVSPETPyVK	Y17;	Replicate 1	Unambiguous	TNS3	NP_073585.8	64759	tensin-3	1	1	65288071	C4(Carbamidomethyl); Y17(Phospho); K19(Label:13C(6))	1	S(2): 0.0; S(5): 0.0; T(6): 0.0; S(12): 0.0; T(15): 0.8; Y(17): 99.2	1	7998			42430000	Heavy	Unique	Used	0.864	46220000	42430000	1.93			0	0	2	1106.98	2212.96	-3.5	79.84	19955	19955	CAL27_CURCUMIN_pTy_R1.raw
1	ESMCSTPAFPVSPETPyVK	Y17;	Replicate 1	Unambiguous	TNS3	NP_073585.8	64759	tensin-3	1	1	65288071	M3(Oxidation); C4(Carbamidomethyl); Y17(Phospho); K19(Label:13C(6))	1	S(2): 0.0; S(5): 0.0; T(6): 0.0; S(12): 0.0; T(15): 1.0; Y(17): 99.0	1	7116			897500	Heavy	Unique	Used	1.962	2219000	897500	2.15			0	61	2	1114.98	2228.95	-1.96	74.02	18401	18401	CAL27_CURCUMIN_pTy_R1.raw
1	ESMCSTPAFPVSPETPyVK	Y17;	Replicate 1	Unambiguous	TNS3	NP_073585.8	64759	tensin-3	1	1	65288071	C4(Carbamidomethyl); Y17(Phospho)	1	S(2): 0.0; S(5): 0.0; T(6): 0.0; S(12): 0.0; T(15): 1.0; Y(17): 99.0	1	7998			46840000	Light	Redundant	Not	0.864	46220000	42430000	1.92			0	61	2	1103.98	2206.94	0.3	79.74	19927	19927	CAL27_CURCUMIN_pTy_R1.raw
1	GSHQISLDNPDyQQDFFPK	Y12;	Replicate 1	Unambiguous	EGFR	NP_005219.2	1956	epidermal growth factor receptor isoform a precursor	1	1	29725609	Y12(Phospho); K19(Label:13C(6))	1	S(2): 0.0; S(6): 0.0; Y(12): 100.0	1	8498			29260000	Heavy	Unique	Used	2.137	78800000	29260000	4.2			0	19	3	774.677	2322.02	0.21	83.09	20813	20813	CAL27_CURCUMIN_pTy_R1.raw
1	GSHQISLDNPDyQQDFFPK	Y12;	Replicate 1	Unambiguous	EGFR	NP_005219.2	1956	epidermal growth factor receptor isoform a precursor	1	1	29725609	Y12(Phospho)	1	S(2): 0.0; S(6): 0.0; Y(12): 100.0	1	8528	1		6663000	Light	Excluded by Method	Not	100	2606000	5315	4.34			0	74	2	1158.5	2316	1.24	83.28	20864	20864	CAL27_CURCUMIN_pTy_R1.raw
1	GSHQISLDNPDyQQDFFPK	Y12;	Replicate 1	Unambiguous	EGFR	NP_005219.2	1956	epidermal growth factor receptor isoform a precursor	1	1	29725609	Y12(Phospho); K19(Label:13C(6))	1	S(2): 0.0; S(6): 0.0; Y(12): 100.0	1	8608			7533000	Heavy	Redundant	Not	2.591	24600000	7533000	2.97			0	0	2	1161.51	2322.01	-0.92	83.77	20991	20991	CAL27_CURCUMIN_pTy_R1.raw
1	GSHQISLDNPDyQQDFFPK	Y12;	Replicate 1	Unambiguous	EGFR	NP_005219.2	1956	epidermal growth factor receptor isoform a precursor	1	1	29725609	Y12(Phospho); K19(Label:13C(6))	1	S(2): 0.0; S(6): 0.0; Y(12): 100.0	1	8615			68690000	Heavy	Unique	Used	2.235	193400000	68690000	5.61			0	4	3	774.678	2322.02	0.44	83.82	21003	21003	CAL27_CURCUMIN_pTy_R1.raw
1	GSHQISLDNPDyQQDFFPK	Y12;	Replicate 1	Unambiguous	EGFR	NP_005219.2	1956	epidermal growth factor receptor isoform a precursor	1	1	29725609	Y12(Phospho)	1	S(2): 0.0; S(6): 0.0; Y(12): 100.0	1	8608			24710000	Light	Unique	Used	2.591	24600000	7533000	4.95			0	5	2	1158.5	2316	2.29	83.9	21025	21025	CAL27_CURCUMIN_pTy_R1.raw
1	GSHQISLDNPDyQQDFFPK	Y12;	Replicate 1	Unambiguous	EGFR	NP_005219.2	1956	epidermal growth factor receptor isoform a precursor	1	1	29725609	Y12(Phospho)	1	S(2): 0.0; S(6): 0.0; Y(12): 100.0	1	8615			196000000	Light	Redundant	Not	2.235	193400000	68690000	5.49			0	1	3	772.67	2316	-0.19	83.97	21043	21043	CAL27_CURCUMIN_pTy_R1.raw
1	ISIGGGSCAISGGyGSR	Y14;	Replicate 1	Unambiguous	KRT6A	NP_005545.1	3853	keratin, type II cytoskeletal 6A	3	1	5031839	C8(Carbamidomethyl); Y14(Phospho)	1	S(2): 0.0; S(7): 0.0; S(11): 0.0; Y(14): 99.3; S(16): 0.7	1	3807			8168000	Light	Unique	Used	3.94	7001000	1410000	2.9			0	17	2	839.867	1678.73	1.08	54	13049	13049	CAL27_CURCUMIN_pTy_R1.raw
1	LSLEGDHSTPPSAyGSVK	Y14;	Replicate 1	Unambiguous	ANXA2	NP_001002857.1	302	annexin A2 isoform 2	2	1	50845386	Y14(Phospho)	1	S(2): 0.0; S(8): 0.0; T(9): 0.0; S(12): 0.0; Y(14): 100.0; S(16): 0.0	1						No Quan Values	Not				5.89			0	0	2	962.939	1924.87	0.79	50.83	12199	12199	CAL27_CURCUMIN_pTy_R1.raw
1	LSLEGDHSTPPSAyGSVK	Y14;	Replicate 1	Unambiguous	ANXA2	NP_001002857.1	302	annexin A2 isoform 2	2	1	50845386	Y14(Phospho); K18(Label:13C(6))	1	S(2): 0.0; S(8): 0.0; T(9): 0.0; S(12): 0.0; Y(14): 100.0; S(16): 0.0	1				352400000		No Quan Values	Not				4.58			0	0	2	965.949	1930.89	0.67	50.89	12215	12215	CAL27_CURCUMIN_pTy_R1.raw
1	LSLEGDHSTPPSAyGSVK	Y14;	Replicate 1	Unambiguous	ANXA2	NP_001002857.1	302	annexin A2 isoform 2	2	1	50845386	Y14(Phospho)	1	S(2): 0.0; S(8): 0.0; T(9): 0.0; S(12): 0.0; Y(14): 100.0; S(16): 0.0	1						No Quan Values	Not				6			0	0	2	962.939	1924.87	0.67	51.39	12349	12349	CAL27_CURCUMIN_pTy_R1.raw
1	LSLEGDHSTPPSAyGSVK	Y14;	Replicate 1	Unambiguous	ANXA2	NP_001002857.1	302	annexin A2 isoform 2	2	1	50845386	Y14(Phospho); K18(Label:13C(6))	1	S(2): 0.0; S(8): 0.0; T(9): 0.0; S(12): 0.0; Y(14): 100.0; S(16): 0.0	1				352400000		No Quan Values	Not				5.92			0	3	2	965.948	1930.89	0.04	51.53	12386	12386	CAL27_CURCUMIN_pTy_R1.raw
1	LSLEGDHSTPPSAyGSVK	Y14;	Replicate 1	Unambiguous	ANXA2	NP_001002857.1	302	annexin A2 isoform 2	2	1	50845386	Y14(Phospho)	1	S(2): 0.0; S(8): 0.0; T(9): 0.0; S(12): 0.0; Y(14): 100.0; S(16): 0.0	1						No Quan Values	Not				6.31			0	0	2	962.94	1924.87	2	51.92	12492	12492	CAL27_CURCUMIN_pTy_R1.raw
1	LSLEGDHSTPPSAyGSVK	Y14;	Replicate 1	Unambiguous	ANXA2	NP_001002857.1	302	annexin A2 isoform 2	2	1	50845386	Y14(Phospho); K18(Label:13C(6))	1	S(2): 0.0; S(8): 0.0; T(9): 0.0; S(12): 0.0; Y(14): 100.0; S(16): 0.0	1				352400000		No Quan Values	Not				3.66			0	0	2	965.948	1930.89	0.35	52.22	12571	12571	CAL27_CURCUMIN_pTy_R1.raw
1	LSLEGDHSTPPSAyGSVK	Y14;	Replicate 1	Unambiguous	ANXA2	NP_001002857.1	302	annexin A2 isoform 2	2	1	50845386	Y14(Phospho)	1	S(2): 0.0; S(8): 0.0; T(9): 0.0; S(12): 0.0; Y(14): 100.0; S(16): 0.0	1	3556			1037000000	Light	Unique	Used	2.167	1037000000	379500000	3.49			0	0	2	962.939	1924.87	0.86	52.5	12645	12645	CAL27_CURCUMIN_pTy_R1.raw
1	LSLEGDHSTPPSAyGSVK	Y14;	Replicate 1	Unambiguous	ANXA2	NP_001002857.1	302	annexin A2 isoform 2	2	1	50845386	Y14(Phospho)	1	S(2): 0.0; S(8): 0.0; T(9): 0.0; S(12): 0.0; Y(14): 99.0; S(16): 0.9	1	3570	1		569500	Light	Unique	Used	40.197	269200	5315	3.88			0	35	3	642.294	1924.87	-0.07	52.6	12672	12672	CAL27_CURCUMIN_pTy_R1.raw
1	LSLEGDHSTPPSAyGSVK	Y14;	Replicate 1	Unambiguous	ANXA2	NP_001002857.1	302	annexin A2 isoform 2	2	1	50845386	Y14(Phospho); K18(Label:13C(6))	1	S(2): 0.0; S(8): 0.0; T(9): 0.0; S(12): 0.0; Y(14): 99.2; S(16): 0.8	1	3306			1002000000	Heavy	Redundant	Not	2.257	2851000000	1002000000	4.94			0	6	3	644.301	1930.89	0.32	52.26	12582	12582	CAL27_CURCUMIN_pTy_R1.raw
1	LSLEGDHSTPPSAyGSVK	Y14;	Replicate 1	Unambiguous	ANXA2	NP_001002857.1	302	annexin A2 isoform 2	2	1	50845386	Y14(Phospho)	1	S(2): 0.0; S(8): 0.0; T(9): 0.0; S(12): 0.0; Y(14): 99.4; S(16): 0.6	1	3306			2851000000	Light	Unique	Used	2.257	2851000000	1002000000	5.67			0	18	3	642.295	1924.87	0.31	50.87	12210	12210	CAL27_CURCUMIN_pTy_R1.raw
1	LSLEGDHSTPPSAyGSVK	Y14;	Replicate 1	Unambiguous	ANXA2	NP_001002857.1	302	annexin A2 isoform 2	2	1	50845386	Y14(Phospho)	1	S(2): 0.0; S(8): 0.0; T(9): 0.0; S(12): 0.0; Y(14): 99.4; S(16): 0.6	1	3306			2851000000	Light	Redundant	Not	2.257	2851000000	1002000000	5.44			0	2	3	642.295	1924.87	1.45	52.03	12521	12521	CAL27_CURCUMIN_pTy_R1.raw
1	LSLEGDHSTPPSAyGSVK	Y14;	Replicate 1	Unambiguous	ANXA2	NP_001002857.1	302	annexin A2 isoform 2	2	1	50845386	Y14(Phospho); K18(Label:13C(6))	1	S(2): 0.0; S(8): 0.0; T(9): 0.0; S(12): 0.0; Y(14): 99.5; S(16): 0.5	1	3306			1002000000	Heavy	Redundant	Not	2.257	2851000000	1002000000	5.27			0	13	3	644.301	1930.89	-0.06	50.99	12242	12242	CAL27_CURCUMIN_pTy_R1.raw
1	LSLEGDHSTPPSAyGSVK	Y14;	Replicate 1	Unambiguous	ANXA2	NP_001002857.1	302	annexin A2 isoform 2	2	1	50845386	Y14(Phospho); K18(Label:13C(6))	1	S(2): 0.0; S(8): 0.0; T(9): 0.0; S(12): 0.0; Y(14): 99.5; S(16): 0.5	1	3306			1002000000	Heavy	Redundant	Not	2.257	2851000000	1002000000	5.29			0	10	3	644.301	1930.89	-1.01	51.61	12410	12410	CAL27_CURCUMIN_pTy_R1.raw
1	GSIDREDGSLQGPIGNQHIyQPVGKPDPAAPPK	Y20;	Replicate 1	Unambiguous	PTK2	NP_722560.1	5747	focal adhesion kinase 1 isoform a	2	1	24476013	R5(Label:13C(6)); Y20(Phospho); K25(Label:13C(6)); K33(Label:13C(6))	1	S(2): 0.0; S(9): 0.0; Y(20): 100.0	1	5008			54080000	Heavy	Redundant	Not	0.821	55980000	54080000	4.7			1	0	4	884.947	3536.77	-0.47	61.16	14957	14957	CAL27_CURCUMIN_pTy_R1.raw
1	GSIDREDGSLQGPIGNQHIyQPVGKPDPAAPPK	Y20;	Replicate 1	Unambiguous	PTK2	NP_722560.1	5747	focal adhesion kinase 1 isoform a	2	1	24476013	Y20(Phospho)	1	S(2): 0.0; S(9): 0.0; Y(20): 100.0	1	5008			55980000	Light	Unique	Used	0.821	55980000	54080000	6.6			1	0	4	880.432	3518.71	0.04	61.44	15030	15030	CAL27_CURCUMIN_pTy_R1.raw
1	HSTPVVMPEPNGLyGGFPFPLEMENK	Y14;	Replicate 1	Unambiguous	FAT2	NP_001438.1	2196	protocadherin Fat 2 precursor	1	1	13787217	Y14(Phospho)	1	S(2): 0.0; T(3): 0.0; Y(14): 100.0	1	14299			75070000	Light	Unique	Used	3.101	72290000	18500000	5.03			0	4	3	989.788	2967.35	1.62	119.14	30485	30485	CAL27_CURCUMIN_pTy_R1.raw
1	QSLTHGSsGYINSTGSTR	S8;	Replicate 1	Unambiguous	COL17A1	NP_000485.3	1308	collagen alpha-1(XVII) chain	1	1	119829187	Y10(Phospho); R18(Label:13C(6))	1	S(2): 0.0; T(4): 0.0; S(7): 1.0; S(8): 98.0; Y(10): 1.0; S(13): 0.0; T(14): 0.0; S(16): 0.0; T(17): 0.0	1	719			17450000	Heavy	Unique	Used	1.959	40200000	16280000	2.82			0	37	3	646.96	1938.86	0.03	33.19	7445	7445	CAL27_CURCUMIN_pTy_R1.raw
1	KSFTPDHVVyAR	Y10;	Replicate 1	Unambiguous	PTRF	NP_036364.2	284119	polymerase I and transcript release factor	1	1	42734430	Y10(Phospho)	1	S(2): 0.0; T(4): 0.0; Y(10): 100.0	1	2191			62910000	Light	Redundant	Not	3.818	62910000	13070000	3.89			1	50	3	500.573	1499.7	0.03	43.7	10280	10280	CAL27_CURCUMIN_pTy_R1.raw
1	KSFTPDHVVyAR	Y10;	Replicate 1	Unambiguous	PTRF	NP_036364.2	284119	polymerase I and transcript release factor	1	1	42734430	K1(Label:13C(6)); Y10(Phospho); R12(Label:13C(6))	1	S(2): 0.0; T(4): 0.0; Y(10): 100.0	1	2191			13120000	Heavy	Redundant	Not	3.818	62910000	13070000	3.48			1	68	3	504.586	1511.74	0.11	44.21	10419	10419	CAL27_CURCUMIN_pTy_R1.raw
1	KSFTPDHVVyAR	Y10;	Replicate 1	Unambiguous	PTRF	NP_036364.2	284119	polymerase I and transcript release factor	1	1	42734430	Y10(Phospho)	1	S(2): 0.0; T(4): 0.0; Y(10): 100.0	1	2191			62910000	Light	Unique	Used	3.818	62910000	13070000	4.14			1	25	3	500.573	1499.7	0.4	44.23	10425	10425	CAL27_CURCUMIN_pTy_R1.raw
1	VSLAGACGVGGyGSR	Y12;	Replicate 1	Unambiguous	KRT5	NP_000415.2	3852	keratin, type II cytoskeletal 5	1	1	119395754	C7(Carbamidomethyl); Y12(Phospho)	1	S(2): 0.0; Y(12): 99.5; S(14): 0.5	1	2913			171900000	Light	Unique	Used	1.079	171900000	126500000	4.03			0	1	2	745.827	1490.65	0.64	48.96	11698	11698	CAL27_CURCUMIN_pTy_R1.raw
1	VSLAGACGVGGyGSR	Y12;	Replicate 1	Unambiguous	KRT5	NP_000415.2	3852	keratin, type II cytoskeletal 5	1	1	119395754	C7(Carbamidomethyl); Y12(Phospho); R15(Label:13C(6))	1	S(2): 0.0; Y(12): 99.6; S(14): 0.4	1	2913			126500000	Heavy	Redundant	Not	1.079	171900000	126500000	3.5			0	54	2	748.837	1496.67	0.48	48.39	11544	11544	CAL27_CURCUMIN_pTy_R1.raw
1	VSLAGACGVGGyGSR	Y12;	Replicate 1	Unambiguous	KRT5	NP_000415.2	3852	keratin, type II cytoskeletal 5	1	1	119395754	C7(Carbamidomethyl); Y12(Phospho); R15(Label:13C(6))	1	S(2): 0.0; Y(12): 99.6; S(14): 0.4	1	2913			126500000	Heavy	Redundant	Not	1.079	171900000	126500000	3.99			0	4	2	748.837	1496.67	0.4	48.97	11699	11699	CAL27_CURCUMIN_pTy_R1.raw
1	HSYPLSSTSGNADSSAVSSQAISPyACFYGASAK	Y25;	Replicate 1	Unambiguous	ARAP2	NP_056045.2	116984	arf-GAP with Rho-GAP domain, ANK repeat and PH domain-containing protein 2	1	1	21264592	Y25(Phospho); C27(Carbamidomethyl)	1	S(2): 0.0; Y(3): 0.0; S(6): 0.0; S(7): 0.0; T(8): 0.0; S(9): 0.0; S(14): 0.0; S(15): 0.0; S(18): 0.0; S(19): 0.0; S(23): 0.0; Y(25): 100.0; Y(29): 0.0; S(32): 0.0	1	7619			16930000	Light	Unique	Used	1.035	16930000	12980000	4.75			0	9	3	1183.51	3548.53	-0.64	77.16	19235	19235	CAL27_CURCUMIN_pTy_R1.raw
1	HSYPLSSTSGNADSSAVSSQAISPyACFYGASAK	Y25;	Replicate 1	Unambiguous	ARAP2	NP_056045.2	116984	arf-GAP with Rho-GAP domain, ANK repeat and PH domain-containing protein 2	1	1	21264592	Y25(Phospho); C27(Carbamidomethyl); K34(Label:13C(6))	1	S(2): 0.0; Y(3): 0.0; S(6): 0.0; S(7): 0.0; T(8): 0.0; S(9): 0.0; S(14): 0.0; S(15): 0.0; S(18): 0.0; S(19): 0.0; S(23): 0.0; Y(25): 100.0; Y(29): 0.0; S(32): 0.0	1	7619			12980000	Heavy	Redundant	Not	1.035	16930000	12980000	3.6			0	0	3	1185.52	3554.54	-2.8	77.17	19239	19239	CAL27_CURCUMIN_pTy_R1.raw
1	RSPyAGLQLGAAK	Y4;	Replicate 1	Unambiguous	TRIM29	NP_036233.2	23650	tripartite motif-containing protein 29	1	1	17402909	Y4(Phospho)	1	S(2): 0.0; Y(4): 100.0	1	3308		1	20230000	Light	Excluded by Method	Not	5.15056	9767000	1505000	2.95			1	0	2	706.36	1411.71	2.85	50.88	12213	12213	CAL27_CURCUMIN_pTy_R1.raw
1	VSGDYGHPVYIVQEMPPQSPANIyYKV	Y24;	Replicate 1	Unambiguous	EFNB2	NP_004084.1	1948	ephrin-B2 precursor	2	1	4758250	Y24(Phospho)	1	S(2): 0.0; Y(5): 0.0; Y(10): 0.0; S(19): 0.0; Y(24): 99.0; Y(25): 1.0	1	10661	1	1	1348000	Light	Excluded by Method	Not	201.287	1348000	5315	2.78			1	0	3	1044.49	3131.46	1.12	96.78	24482	24482	CAL27_CURCUMIN_pTy_R1.raw
1	LSLGQyDNDAGGQLPFSK	Y6;	Replicate 1	Unambiguous	TNS3	NP_073585.8	64759	tensin-3	1	1	65288071	Y6(Phospho); K18(Label:13C(6))	1	S(2): 0.0; Y(6): 100.0; S(17): 0.0	1	8327			22960000	Heavy	Redundant	Not	0.693	20050000	22960000	2.17			0	34	2	998.464	1995.92	2.2	81.87	20493	20493	CAL27_CURCUMIN_pTy_R1.raw
1	LSLGQyDNDAGGQLPFSK	Y6;	Replicate 1	Unambiguous	TNS3	NP_073585.8	64759	tensin-3	1	1	65288071	Y6(Phospho)	1	S(2): 0.0; Y(6): 100.0; S(17): 0.0	1	8327			20050000	Light	Unique	Used	0.693	20050000	22960000	2.82			0	0	2	995.451	1989.89	-0.68	81.89	20500	20500	CAL27_CURCUMIN_pTy_R1.raw
1	LSLGQyDNDAGGQLPFSK	Y6;	Replicate 1	Unambiguous	TNS3	NP_073585.8	64759	tensin-3	1	1	65288071	Y6(Phospho); K18(Label:13C(6))	1	S(2): 0.0; Y(6): 100.0; S(17): 0.0	1	8327			22960000	Heavy	Redundant	Not	0.693	20050000	22960000	2.48			0	27	2	998.461	1995.91	-0.61	82.45	20648	20648	CAL27_CURCUMIN_pTy_R1.raw
1	QSPEDVyFSK	Y7;	Replicate 1	Unambiguous	EPHA2	NP_004422.2	1969	ephrin type-A receptor 2 precursor	1	1	32967311	Y7(Phospho)	1	S(2): 0.0; Y(7): 100.0; S(9): 0.0	1	2759			109000000	Light	Unique	Used	1.894	108200000	45340000	2.9			0	27	2	640.267	1279.53	1.68	47.37	11268	11268	CAL27_CURCUMIN_pTy_R1.raw
1	QSPEDVyFSK	Y7;	Replicate 1	Unambiguous	EPHA2	NP_004422.2	1969	ephrin type-A receptor 2 precursor	1	1	32967311	Y7(Phospho); K10(Label:13C(6))	1	S(2): 0.0; Y(7): 100.0; S(9): 0.0	1	2759			45340000	Heavy	Redundant	Not	1.894	108200000	45340000	2.68			0	39	2	643.277	1285.55	1.59	47.37	11270	11270	CAL27_CURCUMIN_pTy_R1.raw
1	QSPEDVyFSK	Y7;	Replicate 1	Unambiguous	EPHA2	NP_004422.2	1969	ephrin type-A receptor 2 precursor	1	1	32967311	Y7(Phospho)	1	S(2): 0.0; Y(7): 100.0; S(9): 0.0	1	2759			109000000	Light	Redundant	Not	1.894	108200000	45340000	2.59			0	9	2	640.266	1279.52	0.25	47.93	11417	11417	CAL27_CURCUMIN_pTy_R1.raw
1	QSPEDVyFSKSEQLKPLK	Y7;	Replicate 1	Unambiguous	EPHA2	NP_004422.2	1969	ephrin type-A receptor 2 precursor	1	1	32967311	Y7(Phospho)	1	S(2): 0.0; Y(7): 100.0; S(9): 0.0; S(11): 0.0	1	5507			21930000	Light	Unique	Used	2.673	21930000	6510000	3.79			1	16	3	735.03	2203.08	3.52	64.17	15759	15759	CAL27_CURCUMIN_pTy_R1.raw
1	QSPEDVyFSK	Y7;	Replicate 1	Unambiguous	EPHA2	NP_004422.2	1969	ephrin type-A receptor 2 precursor	1	1	32967311	Y7(Phospho); K10(Label:13C(6))	1	S(2): 0.0; Y(7): 99.4; S(9): 0.6	1	2759			45340000	Heavy	Redundant	Not	1.894	108200000	45340000	2.59			0	9	2	643.276	1285.54	0.26	47.93	11419	11419	CAL27_CURCUMIN_pTy_R1.raw
1	NSFNNPAyYVLEGVPHQLLPPEPPSPAR	Y8;	Replicate 1	Unambiguous	INPPL1	NP_001558.3	3636	phosphatidylinositol 3,4,5-trisphosphate 5-phosphatase 2	1	1	222136583	Y8(Phospho)	1	S(2): 0.0; Y(8): 98.9; Y(9): 1.1; S(25): 0.0	1	14919			201200000	Light	Unique	Used	2.71	190100000	55660000	5.52			0	4	3	1061.85	3183.54	2.59	122.63	31422	31422	CAL27_CURCUMIN_pTy_R1.raw
1	NSFNNPAyYVLEGVPHQLLPPEPPSPAR	Y8;	Replicate 1	Unambiguous	INPPL1	NP_001558.3	3636	phosphatidylinositol 3,4,5-trisphosphate 5-phosphatase 2	1	1	222136583	Y8(Phospho)	1	S(2): 0.0; Y(8): 98.9; Y(9): 1.1; S(25): 0.0	1	15020			95570000	Light	Unique	Used	2.465	95570000	30770000	6.41			0	12	3	1061.85	3183.54	2.13	123.22	31579	31579	CAL27_CURCUMIN_pTy_R1.raw
2	NSFNNPAYyVLEGVPHQLLPPEPPsPAR	Y9; S25;	Replicate 1	Unambiguous	INPPL1	NP_001558.3	3636	phosphatidylinositol 3,4,5-trisphosphate 5-phosphatase 2	1	1	222136583	Y8(Phospho); S25(Phospho)	1	S(2): 2.7; Y(8): 2.7; Y(9): 94.6; S(25): 100.0	1						No Quan Values	Not				2.62			0	32	3	1088.51	3263.51	3.27	124.33	31878	31878	CAL27_CURCUMIN_pTy_R1.raw
1	NSNSYGIPEPAHAyAQPQTTTPLPAVSGSPGAAITPLPSTQNGPVFAK	Y14;	Replicate 1	Unambiguous	CRKL	NP_005198.1	1399	crk-like protein	1	1	4885153	Y5(Phospho); Y14(Phospho)	1	S(2): 34.2; S(4): 34.2; Y(5): 34.2; Y(14): 97.3; T(19): 0.0; T(20): 0.0; T(21): 0.0; S(27): 0.0; S(29): 0.0; T(35): 0.0; S(39): 0.0; T(40): 0.0	1	11359			139800000	Light	Unique	Used	1.181	24290000	16310000	4.49			0	0	4	1241.34	4962.34	0.61	101.05	25629	25629	CAL27_CURCUMIN_pTy_R1.raw
1	IDSIPHLNNSTPLVDPSVyGYGVQK	Y19;	Replicate 1	Unambiguous	FUBP3	NP_003925.1	8939	far upstream element-binding protein 3	1	1	100816392	Y19(Phospho)	1	S(3): 0.0; S(10): 0.0; T(11): 0.0; S(17): 0.0; Y(19): 99.3; Y(21): 0.7	1	9519			17400000	Light	Unique	Used	7	16390000	1858000	3.86			0	0	3	931.788	2793.35	-0.35	89.77	22602	22602	CAL27_CURCUMIN_pTy_R1.raw
1	LVSSPCCIVTSTyGWTANMER	Y13;	Replicate 1	Unambiguous	HSP90AB1	NP_001258901.1	3326	heat shock protein HSP 90-beta isoform c	3	1	431822408	C6(Carbamidomethyl); C7(Carbamidomethyl); Y13(Phospho)	1	S(3): 0.0; S(4): 0.0; T(10): 0.0; S(11): 0.0; T(12): 0.7; Y(13): 99.3; T(16): 0.0	1	10750		1	50510000	Light	Excluded by Method	Not	8.08324	12670000	1244000	4.09			0	14	2	1256.54	2512.08	4.22	97.35	24636	24636	CAL27_CURCUMIN_pTy_R1.raw
1	LVSSPCCIVTSTyGWTANMER	Y13;	Replicate 1	Unambiguous	HSP90AB1	NP_001258901.1	3326	heat shock protein HSP 90-beta isoform c	3	1	431822408	C6(Carbamidomethyl); C7(Carbamidomethyl); Y13(Phospho)	1	S(3): 0.0; S(4): 0.0; T(10): 0.0; S(11): 0.0; T(12): 0.9; Y(13): 99.1; T(16): 0.0	1	10749			116400000	Light	Unique	Used	7.494	89440000	9470000	4.6			0	37	3	838.03	2512.07	1.4	97.34	24634	24634	CAL27_CURCUMIN_pTy_R1.raw
1	LVSSPCCIVTSTyGWTANMER	Y13;	Replicate 1	Unambiguous	HSP90AB1	NP_001258901.1	3326	heat shock protein HSP 90-beta isoform c	3	1	431822408	C6(Carbamidomethyl); C7(Carbamidomethyl); Y13(Phospho)	1	S(3): 0.0; S(4): 0.0; T(10): 0.0; S(11): 0.0; T(12): 0.9; Y(13): 99.1; T(16): 0.0	1	10851			225100000	Light	Unique	Used	8.463	222300000	20840000	5.09			0	21	3	838.029	2512.07	0.52	97.98	24805	24805	CAL27_CURCUMIN_pTy_R1.raw
1	LPSSPVyEDAASFK	Y7;	Replicate 1	Unambiguous	CTTN	NP_612632.1	2017	src substrate cortactin isoform b	3	1	20357556	Y7(Phospho)	1	S(3): 0.0; S(4): 0.0; Y(7): 100.0; S(12): 0.0	1	6239			60250000	Light	Redundant	Not	2.077	59920000	22890000	2.7			0	19	2	795.858	1590.71	0	68.61	16951	16951	CAL27_CURCUMIN_pTy_R1.raw
1	LPSSPVyEDAASFK	Y7;	Replicate 1	Unambiguous	CTTN	NP_612632.1	2017	src substrate cortactin isoform b	3	1	20357556	Y7(Phospho); K14(Label:13C(6))	1	S(3): 0.0; S(4): 0.0; Y(7): 100.0; S(12): 0.0	1	6239			22890000	Heavy	Unique	Used	2.077	59920000	22890000	3.41			0	9	2	798.869	1596.73	1.15	69.06	17071	17071	CAL27_CURCUMIN_pTy_R1.raw
1	LPSSPVyEDAASFK	Y7;	Replicate 1	Unambiguous	CTTN	NP_612632.1	2017	src substrate cortactin isoform b	3	1	20357556	Y7(Phospho)	1	S(3): 0.0; S(4): 0.0; Y(7): 100.0; S(12): 0.0	1	6239			60250000	Light	Redundant	Not	2.077	59920000	22890000	3.32			0	5	2	795.859	1590.71	0.76	69.16	17099	17099	CAL27_CURCUMIN_pTy_R1.raw
1	LVSSPCCIVtSTYGWTANMER	T10;	Replicate 1	Unambiguous	HSP90AB1	NP_001258901.1	3326	heat shock protein HSP 90-beta isoform c	3	1	431822408	C6(Carbamidomethyl); C7(Carbamidomethyl); Y13(Phospho); M19(Oxidation)	1	S(3): 0.0; S(4): 1.5; T(10): 97.0; S(11): 1.5; T(12): 0.0; Y(13): 0.0; T(16): 0.0	1	10814	1		8839000	Light	Excluded by Method	Not	100	4865000	5315	2.99			0	13	3	843.36	2528.06	-0.32	97.76	24746	24746	CAL27_CURCUMIN_pTy_R1.raw
1	INSDDSNLyLTASK	Y9;	Replicate 1	Unambiguous	RAB34	NP_001243205.1	83871	ras-related protein Rab-34 isoform 6	6	1	372266169	Y9(Phospho)	1	S(3): 0.0; S(6): 0.0; Y(9): 100.0; T(11): 0.0; S(13): 0.0	1	3234		1	10430000	Light	Excluded by Method	Not	12.1136	5887000	385700	4.05			0	0	2	810.861	1620.72	0.04	50.46	12101	12101	CAL27_CURCUMIN_pTy_R1.raw
1	KPSVPDSASPADDSFVDPGERLyDLNMPAYVK	Y23;	Replicate 1	Unambiguous	NCK1	NP_001177725.1	4690	cytoplasmic protein NCK1 isoform 2	2	1	299829184	K1(Label:13C(6)); R21(Label:13C(6)); Y23(Phospho); K32(Label:13C(6))	1	S(3): 0.0; S(7): 0.0; S(9): 0.0; S(14): 0.0; Y(23): 100.0; Y(30): 0.0	1	11191		1	1001000	Heavy	Excluded by Method	Not	2.02654	2556000	1001000	3.47			1	21	3	1193.57	3578.69	0.45	100.08	25369	25369	CAL27_CURCUMIN_pTy_R1.raw
1	KPSVPDSASPADDSFVDPGERLyDLNMPAYVK	Y23;	Replicate 1	Unambiguous	NCK1	NP_001177725.1	4690	cytoplasmic protein NCK1 isoform 2	2	1	299829184	Y23(Phospho)	1	S(3): 0.0; S(7): 0.0; S(9): 0.0; S(14): 0.0; Y(23): 100.0; Y(30): 0.0	1	11191		1	8425000	Light	Excluded by Method	Not	2.02654	2556000	1001000	3.51			1	13	3	1187.55	3560.63	0.03	100.25	25414	25414	CAL27_CURCUMIN_pTy_R1.raw
1	CGSGPVHISGQHLVAVEEDAEsEDEEEEDVK	S22;	Replicate 1	Unambiguous	NPM1	NP_954654.1	4869	nucleophosmin isoform 2	3	1	40353734	C1(Carbamidomethyl); S22(Phospho)	1	S(3): 0.0; S(9): 0.0; S(22): 100.0	1	6447			6850000	Light	Unique	Used	0.849	6539000	6112000	6.83			0	6	4	865.863	3460.43	-1.56	69.88	17291	17291	CAL27_CURCUMIN_pTy_R1.raw
1	NASTFEDVTQVSSAyQK	Y15;	Replicate 1	Unambiguous	CTTN	NP_612632.1	2017	src substrate cortactin isoform b	3	1	20357556	Y15(Phospho)	1	S(3): 0.0; T(4): 0.0; T(9): 0.0; S(12): 0.0; S(13): 0.0; Y(15): 100.0	1	4655			38910000	Light	Unique	Used	5.164	35840000	5507000	2.89			0	53	2	977.928	1954.85	3.07	59.12	14411	14411	CAL27_CURCUMIN_pTy_R1.raw
1	NASTFEDVTQVSSAyQK	Y15;	Replicate 1	Unambiguous	CTTN	NP_612632.1	2017	src substrate cortactin isoform b	3	1	20357556	Y15(Phospho); K17(Label:13C(6))	1	S(3): 0.0; T(4): 0.0; T(9): 0.0; S(12): 0.0; S(13): 0.0; Y(15): 100.0	1	4655			5507000	Heavy	Redundant	Not	5.164	35840000	5507000	2.29			0	52	2	980.937	1960.87	1.76	59.3	14458	14458	CAL27_CURCUMIN_pTy_R1.raw
1	APSTyGGGLSVSSSR	Y5;	Replicate 1	Unambiguous	KRT14	NP_000517.2	3861	keratin, type I cytoskeletal 14	1	1	15431310	Y5(Phospho); R15(Label:13C(6))	1	S(3): 0.0; T(4): 0.5; Y(5): 99.5; S(10): 0.0; S(12): 0.0; S(13): 0.0; S(14): 0.0	1	1516			2761000	Heavy	Redundant	Not	2.94	10230000	2761000	2.09			0	38	2	756.346	1511.68	0.51	39.53	9157	9157	CAL27_CURCUMIN_pTy_R1.raw
1	APSTyGGGLSVSSSR	Y5;	Replicate 1	Unambiguous	KRT14	NP_000517.2	3861	keratin, type I cytoskeletal 14	1	1	15431310	Y5(Phospho)	1	S(3): 0.0; T(4): 0.5; Y(5): 99.5; S(10): 0.0; S(12): 0.0; S(13): 0.0; S(14): 0.0	1	1516			11590000	Light	Redundant	Not	2.94	10230000	2761000	3.1			0	23	2	753.335	1505.66	0.26	39.76	9221	9221	CAL27_CURCUMIN_pTy_R1.raw
2	HVSPVtPPREVPIyANR	T6; Y14;	Replicate 1	Unambiguous	ADAM9	NP_003807.1	8754	disintegrin and metalloproteinase domain-containing protein 9 precursor	1	1	4501915	T6(Phospho); Y14(Phospho)	1	S(3): 0.0; T(6): 100.0; Y(14): 100.0	1	4880			24760000	Light	Unique	Used	3.848	24760000	5106000	2.88			1	4	3	697.997	2091.98	-0.08	60.44	14763	14763	CAL27_CURCUMIN_pTy_R1.raw
2	HVSPVtPPREVPIyANR	T6; Y14;	Replicate 1	Unambiguous	ADAM9	NP_003807.1	8754	disintegrin and metalloproteinase domain-containing protein 9 precursor	1	1	4501915	T6(Phospho); R9(Label:13C(6)); Y14(Phospho); R17(Label:13C(6))	1	S(3): 0.0; T(6): 100.0; Y(14): 100.0	1	4880			5106000	Heavy	Redundant	Not	3.848	24760000	5106000	2.54			1	44	3	702.011	2104.02	0.11	60.54	14790	14790	CAL27_CURCUMIN_pTy_R1.raw
1	VPSVELTNLYPyCDYEMK	Y12;	Replicate 1	Unambiguous	ITGB4	NP_001005731.1	3691	integrin beta-4 isoform 3 precursor	3	1	54607033	Y12(Phospho); C13(Carbamidomethyl); K18(Label:13C(6))	1	S(3): 0.0; T(7): 0.0; Y(10): 0.0; Y(12): 100.0; Y(15): 0.0	1	10716		1	828900	Heavy	Excluded by Method	Not	4.44556	4643000	828900	4.58			0	8	2	1154.01	2307.01	3.69	97.22	24600	24600	CAL27_CURCUMIN_pTy_R1.raw
1	VPSVELTNLYPyCDYEMK	Y12;	Replicate 1	Unambiguous	ITGB4	NP_001005731.1	3691	integrin beta-4 isoform 3 precursor	3	1	54607033	Y12(Phospho); C13(Carbamidomethyl)	1	S(3): 0.0; T(7): 0.0; Y(10): 0.0; Y(12): 99.2; Y(15): 0.8	1	10716		1	12380000	Light	Excluded by Method	Not	4.44556	4643000	828900	2.29			0	15	2	1150.99	2300.98	-1.88	97.12	24574	24574	CAL27_CURCUMIN_pTy_R1.raw
1	VPSVELTNLYPyCDYEMK	Y12;	Replicate 1	Unambiguous	ITGB4	NP_001005731.1	3691	integrin beta-4 isoform 3 precursor	3	1	54607033	Y12(Phospho); C13(Carbamidomethyl)	1	S(3): 0.0; T(7): 0.0; Y(10): 0.7; Y(12): 99.3; Y(15): 0.0	1	10830			5404000	Light	Unique	Used	1.176	3980000	2686000	2.42			0	23	2	1151	2300.99	-0.07	97.86	24772	24772	CAL27_CURCUMIN_pTy_R1.raw
1	GASQAGMTGyGMPR	Y10;	Replicate 1	Unambiguous	TAGLN2	NP_001264152.1	8407	transgelin-2 isoform b	3	1	469608407	Y10(Phospho)	1	S(3): 0.0; T(8): 0.0; Y(10): 100.0	1	2113			38710000	Light	Redundant	Not	3.178	37640000	9398000	3.17			0	0	2	732.295	1463.58	1.55	43.18	10141	10141	CAL27_CURCUMIN_pTy_R1.raw
1	GASQAGMTGyGMPR	Y10;	Replicate 1	Unambiguous	TAGLN2	NP_001264152.1	8407	transgelin-2 isoform b	3	1	469608407	Y10(Phospho); R14(Label:13C(6))	1	S(3): 0.0; T(8): 0.0; Y(10): 100.0	1	2113			9398000	Heavy	Redundant	Not	3.178	37640000	9398000	3.23			0	36	2	735.303	1469.6	-1.61	43.42	10206	10206	CAL27_CURCUMIN_pTy_R1.raw
1	GASQAGMTGyGMPR	Y10;	Replicate 1	Unambiguous	TAGLN2	NP_001264152.1	8407	transgelin-2 isoform b	3	1	469608407	Y10(Phospho)	1	S(3): 0.0; T(8): 0.0; Y(10): 100.0	1	2113			38710000	Light	Unique	Used	3.178	37640000	9398000	3.72			0	4	2	732.294	1463.58	0.3	43.74	10291	10291	CAL27_CURCUMIN_pTy_R1.raw
1	GASQAGMTGyGMPR	Y10;	Replicate 1	Unambiguous	TAGLN2	NP_001264152.1	8407	transgelin-2 isoform b	3	1	469608407	Y10(Phospho); R14(Label:13C(6))	1	S(3): 0.0; T(8): 0.0; Y(10): 100.0	1	2113			9398000	Heavy	Redundant	Not	3.178	37640000	9398000	2.64			0	0	2	735.304	1469.6	0.39	43.99	10360	10360	CAL27_CURCUMIN_pTy_R1.raw
1	ALSVGNIDDALQCySEAIK	Y14;	Replicate 1	Unambiguous	STIP1	NP_006810.1	10963	stress-induced-phosphoprotein 1 isoform b	3	1	5803181	C13(Carbamidomethyl); Y14(Phospho)	1	S(3): 0.0; Y(14): 99.2; S(15): 0.8	1						No Quan Values	Not				2.51			0	61	2	1073.99	2146.97	-0.12	99.34	25169	25169	CAL27_CURCUMIN_pTy_R1.raw
1	GESAGyMEPYEAQR	Y6;	Replicate 1	Unambiguous	SHB	NP_003019.2	6461	SH2 domain-containing adapter protein B	1	1	106879210	Y6(Phospho); R14(Label:13C(6))	1	S(3): 0.0; Y(6): 100.0; Y(10): 0.0	1	2542			21530000	Heavy	Unique	Used	0.596	16180000	21530000	3.99			0	26	2	837.335	1673.66	0.81	46.21	10958	10958	CAL27_CURCUMIN_pTy_R1.raw
1	KLSLGQyDNDAGGQLPFSK	Y7;	Replicate 1	Unambiguous	TNS3	NP_073585.8	64759	tensin-3	1	1	65288071	Y7(Phospho)	1	S(3): 0.0; Y(7): 100.0; S(18): 0.0	1	7384			9608000	Light	Unique	Used	0.573	7891000	10930000	3.49			1	8	3	706.669	2117.99	1.57	75.67	18840	18840	CAL27_CURCUMIN_pTy_R1.raw
1	GESAGyMEPYEAQR	Y6;	Replicate 1	Unambiguous	SHB	NP_003019.2	6461	SH2 domain-containing adapter protein B	1	1	106879210	S3(Phospho)	1	S(3): 0.6; Y(6): 99.4; Y(10): 0.0	1	2542			16180000	Light	Redundant	Not	0.596	16180000	21530000	2.33			0	51	2	834.324	1667.64	-0.14	46.01	10905	10905	CAL27_CURCUMIN_pTy_R1.raw
1	KLSLGQyDNDAGGQLPFSK	Y7;	Replicate 1	Unambiguous	TNS3	NP_073585.8	64759	tensin-3	1	1	65288071	Y7(Phospho)	1	S(3): 0.9; Y(7): 99.1; S(18): 0.0	1	7384			9608000	Light	Redundant	Not	0.573	7891000	10930000	2.72			1	36	3	706.671	2118	4.17	76.23	18989	18989	CAL27_CURCUMIN_pTy_R1.raw
1	HLSPyATLTVGDSSHK	Y5;	Replicate 1	Unambiguous	ESYT1	NP_056107.1	23344	extended synaptotagmin-1 isoform 2	2	1	14149680	Y5(Phospho); K16(Label:13C(6))	1	S(3): 1.0; Y(5): 98.9; T(7): 0.0; T(9): 0.0; S(13): 0.0; S(14): 0.0	1	3104			3624000	Heavy	Unique	Used	0.809	3694000	3624000	3.43			0	73	3	600.286	1798.84	-1.81	49.72	11898	11898	CAL27_CURCUMIN_pTy_R1.raw
2	WDsYENLSADGEVLHTQGPVDGSLyAK	S3; Y25;	Replicate 1	Unambiguous	TNS3	NP_073585.8	64759	tensin-3	1	1	65288071	Y4(Phospho); Y25(Phospho); K27(Label:13C(6))	1	S(3): 100.0; Y(4): 0.0; S(8): 0.0; T(16): 0.0; S(23): 0.0; Y(25): 100.0	1	9669			187900000	Heavy	Unique	Used	0.639	151300000	187900000	5.68			0	11	3	1039.78	3117.32	0.58	90.74	22860	22860	CAL27_CURCUMIN_pTy_R1.raw
1	AHQSESyLPIGCK	Y7;	Replicate 1	Unambiguous	BCAR3	NP_001248338.1	8412	breast cancer anti-estrogen resistance protein 3 isoform 1	2	1	387157909	S6(Phospho); C12(Carbamidomethyl); K13(Label:13C(6))	1	S(4): 0.0; S(6): 0.6; Y(7): 99.4	1	2880			3245000	Heavy	Redundant	Not	2.284	9340000	3245000	2.06			0	44	2	788.351	1575.69	-1.21	48.18	11486	11486	CAL27_CURCUMIN_pTy_R1.raw
1	GPVSGTEPEPVYSMEAADyR	Y19;	Replicate 1	Unambiguous	CTTN	NP_612632.1	2017	src substrate cortactin isoform b	3	1	20357556	Y19(Phospho)	1	S(4): 0.0; T(6): 0.0; Y(12): 0.0; S(13): 0.0; Y(19): 100.0	1	6493		1	675200	Light	Excluded by Method	Not	6.10254	266200	34620	2.84			0	41	3	745.649	2234.93	-0.14	70.18	17371	17371	CAL27_CURCUMIN_pTy_R1.raw
1	GPVSGTEPEPVySMEAADYR	Y12;	Replicate 1	Unambiguous	CTTN	NP_612632.1	2017	src substrate cortactin isoform b	3	1	20357556	Y12(Phospho)	1	S(4): 0.0; T(6): 0.0; Y(12): 100.0; S(13): 0.0; Y(19): 0.0	1	7048			8449000	Light	Unique	Used	2.24	8304000	2942000	4.46			0	23	3	745.648	2234.93	-0.71	73.63	18296	18296	CAL27_CURCUMIN_pTy_R1.raw
1	GPVSGTEPEPVySMEAADYR	Y12;	Replicate 1	Unambiguous	CTTN	NP_612632.1	2017	src substrate cortactin isoform b	3	1	20357556	Y12(Phospho)	1	S(4): 0.0; T(6): 0.0; Y(12): 99.4; S(13): 0.6; Y(19): 0.0	1	6933			6924000	Light	Unique	Used	2.257	6924000	2434000	2.74			0	0	2	1117.97	2234.93	1.07	72.94	18109	18109	CAL27_CURCUMIN_pTy_R1.raw
1	GPVSGTEPEPVySMEAADYR	Y12;	Replicate 1	Unambiguous	CTTN	NP_612632.1	2017	src substrate cortactin isoform b	3	1	20357556	Y12(Phospho)	1	S(4): 0.0; T(6): 0.0; Y(12): 99.4; S(13): 0.6; Y(19): 0.0	1	7130			12650000	Light	Unique	Used	1.967	12650000	5103000	3.12			0	0	2	1117.97	2234.93	0.3	74.07	18414	18414	CAL27_CURCUMIN_pTy_R1.raw
1	GPVSGTEPEPVySMEAADYR	Y12;	Replicate 1	Unambiguous	CTTN	NP_612632.1	2017	src substrate cortactin isoform b	3	1	20357556	Y12(Phospho)	1	S(4): 0.0; T(6): 0.0; Y(12): 99.5; S(13): 0.5; Y(19): 0.0	1	7025			21600000	Light	Redundant	Not	1.909	21600000	8978000	3.17			0	8	2	1117.97	2234.93	0.74	73.51	18262	18262	CAL27_CURCUMIN_pTy_R1.raw
1	GPVSGTEPEPVySMEAADYR	Y12;	Replicate 1	Unambiguous	CTTN	NP_612632.1	2017	src substrate cortactin isoform b	3	1	20357556	Y12(Phospho); R20(Label:13C(6))	1	S(4): 0.0; T(6): 0.0; Y(12): 99.5; S(13): 0.5; Y(19): 0.0	1	7025			8978000	Heavy	Unique	Used	1.909	21600000	8978000	3.31			0	4	2	1120.98	2240.95	0.69	73.83	18350	18350	CAL27_CURCUMIN_pTy_R1.raw
1	QADSEMTGyVVTR	Y9;	Replicate 1	Unambiguous	MAPK12	NP_002960.2	6300	mitogen-activated protein kinase 12	1	1	48255970	Y9(Phospho)	1	S(4): 0.0; T(7): 0.0; Y(9): 100.0; T(12): 0.0	1	2621			62800000	Light	Unique	Used	3.247	57720000	14110000	4.08			0	23	2	768.823	1536.64	-0.32	46.48	11031	11031	CAL27_CURCUMIN_pTy_R1.raw
1	QADSEMTGyVVTR	Y9;	Replicate 1	Unambiguous	MAPK12	NP_002960.2	6300	mitogen-activated protein kinase 12	1	1	48255970	M6(Oxidation); Y9(Phospho)	1	S(4): 0.0; T(7): 0.0; Y(9): 100.0; T(12): 0.0	1	2629	1		2754000	Light	Excluded by Method	Not	100	1252000	5315	2.3			0	39	2	776.823	1552.64	1.94	46.52	11042	11042	CAL27_CURCUMIN_pTy_R1.raw
1	QADSEMTGyVVTR	Y9;	Replicate 1	Unambiguous	MAPK12	NP_002960.2	6300	mitogen-activated protein kinase 12	1	1	48255970	Y9(Phospho); R13(Label:13C(6))	1	S(4): 0.0; T(7): 0.0; Y(9): 100.0; T(12): 0.0	1	2621			14110000	Heavy	Redundant	Not	3.247	57720000	14110000	2.83			0	73	2	771.835	1542.66	1.75	47.01	11173	11173	CAL27_CURCUMIN_pTy_R1.raw
1	QADSEMTGyVVTR	Y9;	Replicate 1	Unambiguous	MAPK12	NP_002960.2	6300	mitogen-activated protein kinase 12	1	1	48255970	Y9(Phospho)	1	S(4): 0.0; T(7): 0.0; Y(9): 100.0; T(12): 0.0	1	2621			62800000	Light	Redundant	Not	3.247	57720000	14110000	3.75			0	29	2	768.824	1536.64	0.95	47.02	11177	11177	CAL27_CURCUMIN_pTy_R1.raw
1	VDQSAVGFEyQGKTEK	Y10;	Replicate 1	Unambiguous	CTTN	NP_612632.1	2017	src substrate cortactin isoform b	3	1	20357556	Y10(Phospho)	1	S(4): 0.0; Y(10): 99.4; T(14): 0.6	1	1884	1		4862000	Light	Excluded by Method	Not	100	2193000	5315	1.94			1	0	2	933.42	1865.83	0.88	41.81	9770	9770	CAL27_CURCUMIN_pTy_R1.raw
1	NINSINFDNPVyQK	Y12;	Replicate 1	Unambiguous	LDLR	NP_001182728.1	3949	low-density lipoprotein receptor isoform 3 precursor	5	1	307775414	Y12(Phospho)	1	S(4): 0.0; Y(12): 100.0	1	6848			3716000	Light	Unique	Used	3.219	3017000	743700	2.08			0	0	2	873.4	1745.79	1.53	72.41	17966	17966	CAL27_CURCUMIN_pTy_R1.raw
1	NINSINFDNPVyQK	Y12;	Replicate 1	Unambiguous	LDLR	NP_001182728.1	3949	low-density lipoprotein receptor isoform 3 precursor	5	1	307775414	Y12(Phospho); K14(Label:13C(6))	1	S(4): 0.0; Y(12): 100.0	1	6894			2542000	Heavy	Unique	Used	3.088	9892000	2542000	3.37			0	10	2	876.408	1751.81	-0.42	72.74	18054	18054	CAL27_CURCUMIN_pTy_R1.raw
1	EDGSLQGPIGNQHIyQPVGKPDPAAPPK	Y15;	Replicate 1	Unambiguous	PTK2	NP_722560.1	5747	focal adhesion kinase 1 isoform a	2	1	24476013	Y15(Phospho); K20(Label:13C(6)); K28(Label:13C(6))	1	S(4): 0.0; Y(15): 100.0	1	4955			5174000	Heavy	Unique	Used	1.099	4443000	3208000	2.96			0	10	3	1001.5	3002.49	2.52	60.87	14877	14877	CAL27_CURCUMIN_pTy_R1.raw
1	GQESEyGNITYPPAMK	Y6;	Replicate 1	Unambiguous	PTPN6	NP_002822.2	5777	tyrosine-protein phosphatase non-receptor type 6 isoform 1	3	1	18104989	Y6(Phospho)	1	S(4): 0.5; Y(6): 99.5; T(10): 0.0; Y(11): 0.0	1	4914			23100000	Light	Unique	Used	5.151	20060000	3090000	2.31			0	21	2	932.896	1864.78	1.06	60.64	14817	14817	CAL27_CURCUMIN_pTy_R1.raw
1	GQESEyGNITYPPAMK	Y6;	Replicate 1	Unambiguous	PTPN6	NP_002822.2	5777	tyrosine-protein phosphatase non-receptor type 6 isoform 1	3	1	18104989	Y6(Phospho)	1	S(4): 0.5; Y(6): 99.5; T(10): 0.0; Y(11): 0.0	1				1673000		No Quan Values	Not				3.41			0	0	2	932.898	1864.79	2.89	61.32	14998	14998	CAL27_CURCUMIN_pTy_R1.raw
1	IIAsLADRPYEEPPQKPPR	S4;	Replicate 1	Unambiguous	ANKS1A	NP_056060.2	23294	ankyrin repeat and SAM domain-containing protein 1A	1	1	140161500	Y10(Phospho)	1	S(4): 100.0; Y(10): 0.0	1	3842	1		12900000	Light	Excluded by Method	Not	100	3480000	5315	2.41			0	21	3	753.051	2257.14	0.9	54.2	13102	13102	CAL27_CURCUMIN_pTy_R1.raw
1	HQHWSLVMESVVPSDRGTYTCLVENAVGsIR	S29;	Replicate 1	Unambiguous	FGFR4	NP_001278909.1	2264	fibroblast growth factor receptor 4 isoform 3 precursor	3	1	634743314	C21(Carbamidomethyl); S29(Phospho); R31(Label:13C(6))	1	S(5): 0.0; S(10): 0.0; S(14): 0.0; T(18): 0.0; Y(19): 0.0; T(20): 0.0; S(29): 100.0	1				2215000000		Inconsistently Labeled	Not				3.8			1	0	4	904.181	3613.7	0.3	108.65	27670	27670	CAL27_CURCUMIN_pTy_R1.raw
1	EADPSNFANFSAyPSEEDMIEWAK	Y13;	Replicate 1	Unambiguous	EPS15	NP_001153441.1	2060	epidermal growth factor receptor substrate 15 isoform B	2	1	229577185	Y13(Phospho)	1	S(5): 0.0; S(11): 1.0; Y(13): 99.0; S(15): 0.0	1	13241		1	2949000	Light	Excluded by Method	Not	3.60073	2949000	650000	3.88			0	12	3	943.388	2828.15	1.6	112.51	28708	28708	CAL27_CURCUMIN_pTy_R1.raw
1	LNWLSVDFNNWKDWEDDsDEDMSNFDR	S18;	Replicate 1	Unambiguous	PTGES3	NP_001269530.1	10728	prostaglandin E synthase 3 isoform b	3	1	543583723	S18(Phospho)	1	S(5): 0.0; S(18): 100.0; S(23): 0.0	1						No Quan Values	Not				2.57			1	29	3	1158.13	3472.38	0.38	126.46	32450	32450	CAL27_CURCUMIN_pTy_R1.raw
1	AAVPSGASTGIyEALELR	Y12;	Replicate 1	Unambiguous	ENO1	NP_001419.1	2023	alpha-enolase isoform 1	4	1	4503571	Y12(Phospho)	1	S(5): 0.0; S(8): 0.0; T(9): 0.0; Y(12): 100.0	1	10754			23380000	Light	Unique	Used	1.261	21520000	13540000	3.43			0	6	2	942.962	1884.92	3.15	97.37	24641	24641	CAL27_CURCUMIN_pTy_R1.raw
1	AAVPSGASTGIyEALELR	Y12;	Replicate 1	Unambiguous	ENO1	NP_001419.1	2023	alpha-enolase isoform 1	4	1	4503571	Y12(Phospho); R18(Label:13C(6))	1	S(5): 0.0; S(8): 0.0; T(9): 0.0; Y(12): 100.0	1	10868			19910000	Heavy	Redundant	Not	1.437	36040000	19910000	2.76			0	0	2	945.97	1890.93	0.82	98.1	24837	24837	CAL27_CURCUMIN_pTy_R1.raw
1	MHLPSPTDSNFyR	Y12;	Replicate 1	Unambiguous	EGFR	NP_005219.2	1956	epidermal growth factor receptor isoform a precursor	1	1	29725609	M1(Oxidation); Y12(Phospho)	1	S(5): 0.0; T(7): 0.0; S(9): 0.0; Y(12): 100.0	1	3964	1	1	2159000	Light	Excluded by Method	Not	322.388	2159000	5315	3.1			0	82	3	554.232	1660.68	-0.26	55.04	13326	13326	CAL27_CURCUMIN_pTy_R1.raw
1	MHLPSPTDSNFyR	Y12;	Replicate 1	Unambiguous	EGFR	NP_005219.2	1956	epidermal growth factor receptor isoform a precursor	1	1	29725609	Y12(Phospho)	1	S(5): 0.0; T(7): 0.0; S(9): 0.0; Y(12): 100.0	1	5984			8113000	Light	Unique	Used	4.503	7709000	1359000	4.52			0	21	3	548.901	1644.69	0.03	66.96	16509	16509	CAL27_CURCUMIN_pTy_R1.raw
1	MHLPSPTDSNFyR	Y12;	Replicate 1	Unambiguous	EGFR	NP_005219.2	1956	epidermal growth factor receptor isoform a precursor	1	1	29725609	Y12(Phospho)	1	S(5): 0.0; T(7): 0.0; S(9): 0.0; Y(12): 100.0	1	6009			22840000	Light	Unique	Used	4.488	14860000	2627000	3.12			0	37	2	822.848	1644.69	0.3	67.11	16549	16549	CAL27_CURCUMIN_pTy_R1.raw
1	MHLPSPTDSNFyR	Y12;	Replicate 1	Unambiguous	EGFR	NP_005219.2	1956	epidermal growth factor receptor isoform a precursor	1	1	29725609	Y12(Phospho)	1	S(5): 0.0; T(7): 0.0; S(9): 0.0; Y(12): 100.0	1	6088			15430000	Light	Unique	Used	3.829	12220000	2533000	3.39			0	24	3	548.901	1644.69	0.47	67.53	16662	16662	CAL27_CURCUMIN_pTy_R1.raw
1	MHLPSPTDSNFyR	Y12;	Replicate 1	Unambiguous	EGFR	NP_005219.2	1956	epidermal growth factor receptor isoform a precursor	1	1	29725609	Y12(Phospho); R13(Label:13C(6))	1	S(5): 0.0; T(7): 0.0; S(9): 0.0; Y(12): 100.0	1	6088			2533000	Heavy	Redundant	Not	3.829	12220000	2533000	2.54			0	60	3	550.908	1650.71	0.26	67.68	16701	16701	CAL27_CURCUMIN_pTy_R1.raw
1	MHLPSPTDSNFyR	Y12;	Replicate 1	Unambiguous	EGFR	NP_005219.2	1956	epidermal growth factor receptor isoform a precursor	1	1	29725609	Y12(Phospho)	1	S(5): 0.0; T(7): 0.0; S(9): 0.4; Y(12): 99.6	1	5909			9563000	Light	Unique	Used	2.915	9401000	2559000	2.73			0	0	2	822.848	1644.69	0.89	66.53	16391	16391	CAL27_CURCUMIN_pTy_R1.raw
1	IMAISAGDAyASNK	Y10;	Replicate 1	Unambiguous	PKP2	NP_001005242.2	5318	plakophilin-2 isoform 2a	2	1	148664186	Y10(Phospho)	1	S(5): 0.0; Y(10): 99.1; S(12): 0.9	1	3242			3096000	Light	Unique	Used	19.294	3096000	127300	2.52			0	27	2	746.332	1491.66	1.69	50.51	12113	12113	CAL27_CURCUMIN_pTy_R1.raw
1	RPAGSVQNPVYHNQPLNPAPsRDPHYQDPHSTAVGNPEYLNTVQPTCVNSTFDSPAHWAQK	S21;	Replicate 1	Unambiguous	EGFR	NP_005219.2	1956	epidermal growth factor receptor isoform a precursor	1	1	29725609	Y26(Phospho); C47(Carbamidomethyl)	1	S(5): 0.0; Y(11): 0.0; S(21): 97.6; Y(26): 2.3; S(31): 0.1; T(32): 0.1; Y(39): 0.0; T(42): 0.0; T(46): 0.0; S(50): 0.0; T(51): 0.0; S(54): 0.0	1	8280		1	126700000	Light	Excluded by Method	Not	6.69241	2184000	259000	11.11			1	1	6	1145.71	6869.2	3.28	81.59	20421	20421	CAL27_CURCUMIN_pTy_R1.raw
1	GLPPSNHHAVYDVPPsVSK	S16;	Replicate 1	Unambiguous	BCAR1	NP_001164190.1	9564	breast cancer anti-estrogen resistance protein 1 isoform 7	8	1	282398123	Y11(Phospho)	1	S(5): 0.0; Y(11): 1.3; S(16): 98.7; S(18): 0.0	1						No Quan Values	Not				2.47			0	85	3	694.334	2080.99	0.77	49.59	11865	11865	CAL27_CURCUMIN_pTy_R1.raw
1	GLPPSNHHAVyDVPPSVSK	Y11;	Replicate 1	Unambiguous	BCAR1	NP_001164190.1	9564	breast cancer anti-estrogen resistance protein 1 isoform 7	8	1	282398123	Y11(Phospho)	1	S(5): 0.0; Y(11): 100.0; S(16): 0.0; S(18): 0.0	1	2608			19650000	Light	Unique	Used	1.854	17790000	7614000	2.47			0	54	3	694.333	2080.99	-0.02	46.4	11010	11010	CAL27_CURCUMIN_pTy_R1.raw
1	GLPPSNHHAVyDVPPSVSK	Y11;	Replicate 1	Unambiguous	BCAR1	NP_001164190.1	9564	breast cancer anti-estrogen resistance protein 1 isoform 7	8	1	282398123	Y11(Phospho)	1	S(5): 0.0; Y(11): 100.0; S(16): 0.0; S(18): 0.0	1						No Quan Values	Not				2.45			0	29	3	694.333	2080.98	-0.46	47.87	11402	11402	CAL27_CURCUMIN_pTy_R1.raw
1	GLPPSNHHAVyDVPPSVSK	Y11;	Replicate 1	Unambiguous	BCAR1	NP_001164190.1	9564	breast cancer anti-estrogen resistance protein 1 isoform 7	8	1	282398123	Y11(Phospho)	1	S(5): 0.0; Y(11): 100.0; S(16): 0.0; S(18): 0.0	1						No Quan Values	Not				2.71			0	51	3	694.333	2080.99	0.15	48.64	11609	11609	CAL27_CURCUMIN_pTy_R1.raw
1	GLPPSNHHAVyDVPPSVSK	Y11;	Replicate 1	Unambiguous	BCAR1	NP_001164190.1	9564	breast cancer anti-estrogen resistance protein 1 isoform 7	8	1	282398123	Y11(Phospho); K19(Label:13C(6))	1	S(5): 0.0; Y(11): 100.0; S(16): 0.0; S(18): 0.0	1	3184			8795000	Heavy	Unique	Used	0.901	9252000	8151000	2.6			0	18	3	696.34	2087	-0.46	50.32	12062	12062	CAL27_CURCUMIN_pTy_R1.raw
1	RPAGSVQNPVyHNQPLNPAPSR	Y11;	Replicate 1	Unambiguous	EGFR	NP_005219.2	1956	epidermal growth factor receptor isoform a precursor	1	1	29725609	Y11(Phospho)	1	S(5): 0.0; Y(11): 100.0; S(21): 0.0	1	2665			520400000	Light	Redundant	Not	3.44	512300000	118200000	5.47			0	0	3	827.073	2479.2	1.78	46.74	11101	11101	CAL27_CURCUMIN_pTy_R1.raw
1	RPAGSVQNPVyHNQPLNPAPSR	Y11;	Replicate 1	Unambiguous	EGFR	NP_005219.2	1956	epidermal growth factor receptor isoform a precursor	1	1	29725609	Y11(Phospho)	1	S(5): 0.0; Y(11): 100.0; S(21): 0.0	1	2679			26830000	Light	Redundant	Not	3.486	26830000	6108000	4.74			0	41	4	620.554	2479.19	-1.68	46.85	11131	11131	CAL27_CURCUMIN_pTy_R1.raw
1	RPAGSVQNPVyHNQPLNPAPSR	Y11;	Replicate 1	Unambiguous	EGFR	NP_005219.2	1956	epidermal growth factor receptor isoform a precursor	1	1	29725609	R1(Label:13C(6)); Y11(Phospho); R22(Label:13C(6))	1	S(5): 0.0; Y(11): 100.0; S(21): 0.0	1	2665			118200000	Heavy	Redundant	Not	3.44	512300000	118200000	6.18			0	11	3	831.085	2491.24	0.53	46.91	11147	11147	CAL27_CURCUMIN_pTy_R1.raw
1	RPAGSVQNPVyHNQPLNPAPSR	Y11;	Replicate 1	Unambiguous	EGFR	NP_005219.2	1956	epidermal growth factor receptor isoform a precursor	1	1	29725609	R1(Label:13C(6)); Y11(Phospho); R22(Label:13C(6))	1	S(5): 0.0; Y(11): 100.0; S(21): 0.0	1	2679			6108000	Heavy	Redundant	Not	3.486	26830000	6108000	5.42			0	67	4	623.565	2491.24	-1.27	46.97	11164	11164	CAL27_CURCUMIN_pTy_R1.raw
1	RPAGSVQNPVyHNQPLNPAPSR	Y11;	Replicate 1	Unambiguous	EGFR	NP_005219.2	1956	epidermal growth factor receptor isoform a precursor	1	1	29725609	Y11(Phospho)	1	S(5): 0.0; Y(11): 100.0; S(21): 0.0	1	2665			520400000	Light	Redundant	Not	3.44	512300000	118200000	5.66			0	1	3	827.072	2479.2	0.82	47.34	11261	11261	CAL27_CURCUMIN_pTy_R1.raw
1	RPAGSVQNPVyHNQPLNPAPSR	Y11;	Replicate 1	Unambiguous	EGFR	NP_005219.2	1956	epidermal growth factor receptor isoform a precursor	1	1	29725609	Y11(Phospho)	1	S(5): 0.0; Y(11): 100.0; S(21): 0.0	1	2679			26830000	Light	Unique	Used	3.486	26830000	6108000	6.07			0	3	4	620.555	2479.2	-0.1	47.45	11288	11288	CAL27_CURCUMIN_pTy_R1.raw
1	RPAGSVQNPVyHNQPLNPAPSR	Y11;	Replicate 1	Unambiguous	EGFR	NP_005219.2	1956	epidermal growth factor receptor isoform a precursor	1	1	29725609	R1(Label:13C(6)); Y11(Phospho); R22(Label:13C(6))	1	S(5): 0.0; Y(11): 100.0; S(21): 0.0	1	2665			118200000	Heavy	Unique	Used	3.44	512300000	118200000	6.58			0	63	3	831.084	2491.24	-0.35	47.5	11303	11303	CAL27_CURCUMIN_pTy_R1.raw
1	GLLPSQYGQEVyDTPPMAVK	Y12;	Replicate 1	Unambiguous	BCAR1	NP_001164190.1	9564	breast cancer anti-estrogen resistance protein 1 isoform 7	9	1	282398123	Y12(Phospho)	1	S(5): 0.0; Y(7): 0.0; Y(12): 100.0; T(14): 0.0	1	9628			11150000	Light	Unique	Used	1.081	11150000	8187000	2.37			0	31	3	758.357	2273.06	0.41	90.47	22789	22789	CAL27_CURCUMIN_pTy_R1.raw
1	QVVESAyEVIK	Y7;	Replicate 1	Unambiguous	LDHA	NP_005557.1	3939	L-lactate dehydrogenase A chain isoform 1	3	1	5031857	Y7(Phospho)	1	S(5): 0.0; Y(7): 100.0	1	4633			4665000	Light	Redundant	Not	0.732	4665000	5055000	2.54			0	52	2	672.826	1344.65	0.44	59.02	14384	14384	CAL27_CURCUMIN_pTy_R1.raw
1	QVVESAyEVIK	Y7;	Replicate 1	Unambiguous	LDHA	NP_005557.1	3939	L-lactate dehydrogenase A chain isoform 1	3	1	5031857	Y7(Phospho); K11(Label:13C(6))	1	S(5): 0.0; Y(7): 100.0	1	4633			5055000	Heavy	Unique	Used	0.732	4665000	5055000	2.77			0	27	2	675.836	1350.66	-0.01	59.08	14400	14400	CAL27_CURCUMIN_pTy_R1.raw
1	GGPGSAVSPyPTFNPSSDVAALHK	Y10;	Replicate 1	Unambiguous	ANXA1	NP_000691.1	301	annexin A1	1	1	4502101	Y10(Phospho)	1	S(5): 0.8; S(8): 0.8; Y(10): 98.3; T(12): 0.0; S(16): 0.0; S(17): 0.0	1	7478			60430000	Light	Unique	Used	3.334	60430000	14380000	6.37			0	3	3	812.713	2436.13	0.89	76.75	19126	19126	CAL27_CURCUMIN_pTy_R1.raw
1	GLPPSNHHAVyDVPPSVSK	Y11;	Replicate 1	Unambiguous	BCAR1	NP_001164190.1	9564	breast cancer anti-estrogen resistance protein 1 isoform 7	8	1	282398123	Y11(Phospho)	1	S(5): 1.6; Y(11): 98.4; S(16): 0.0; S(18): 0.0	1	3421	1	1	3827000	Light	Excluded by Method	Not	571.458	3827000	5315	2.31			0	34	3	694.334	2080.99	1.3	51.69	12430	12430	CAL27_CURCUMIN_pTy_R1.raw
1	LCDFGSASHVADNDITPyLVSR	Y18;	Replicate 1	Unambiguous	PRPF4B	NP_003904.3	8899	serine/threonine-protein kinase PRP4 homolog	1	1	89276756	C2(Carbamidomethyl); Y18(Phospho); R22(Label:13C(6))	1	S(6): 0.0; S(8): 0.0; T(16): 0.0; Y(18): 100.0; S(21): 0.0	1	8133			3265000	Heavy	Unique	Used	1.061	4364000	3265000	2.93			0	0	3	841.715	2523.13	-1.01	80.94	20247	20247	CAL27_CURCUMIN_pTy_R1.raw
1	LCDFGSASHVADNDITPyLVSR	Y18;	Replicate 1	Unambiguous	PRPF4B	NP_003904.3	8899	serine/threonine-protein kinase PRP4 homolog	1	1	89276756	C2(Carbamidomethyl); Y18(Phospho)	1	S(6): 0.0; S(8): 0.0; T(16): 0.0; Y(18): 100.0; S(21): 0.0	1						No Quan Values	Not				5.3			0	4	3	839.709	2517.11	0.14	83.57	20935	20935	CAL27_CURCUMIN_pTy_R1.raw
1	LCDFGSASHVADNDITPyLVSR	Y18;	Replicate 1	Unambiguous	PRPF4B	NP_003904.3	8899	serine/threonine-protein kinase PRP4 homolog	1	1	89276756	C2(Carbamidomethyl); Y18(Phospho); R22(Label:13C(6))	1	S(6): 0.0; S(8): 0.0; T(16): 0.0; Y(18): 100.0; S(21): 0.0	1	8593	1		3978000000	Heavy	Excluded by Method	Not	0.01	5315	1335000000	6.85			0	5	3	841.715	2523.13	-0.14	83.68	20967	20967	CAL27_CURCUMIN_pTy_R1.raw
1	LCDFGSASHVADNDITPyLVSR	Y18;	Replicate 1	Unambiguous	PRPF4B	NP_003904.3	8899	serine/threonine-protein kinase PRP4 homolog	1	1	89276756	C2(Carbamidomethyl); Y18(Phospho); R22(Label:13C(6))	1	S(6): 0.0; S(8): 0.0; T(16): 0.0; Y(18): 100.0; S(21): 0.0	1	8601			248900000	Heavy	Redundant	Not	0.957	291100000	241400000	3.49			0	0	2	1262.07	2523.13	-0.45	83.75	20985	20985	CAL27_CURCUMIN_pTy_R1.raw
1	LCDFGSASHVADNDITPyLVSR	Y18;	Replicate 1	Unambiguous	PRPF4B	NP_003904.3	8899	serine/threonine-protein kinase PRP4 homolog	1	1	89276756	C2(Carbamidomethyl); T16(Phospho)	1	S(6): 0.0; S(8): 0.0; T(16): 0.0; Y(18): 100.0; S(21): 0.0	1	8601			291100000	Light	Unique	Used	0.957	291100000	241400000	5.55			0	3	2	1259.06	2517.11	0.37	84.32	21138	21138	CAL27_CURCUMIN_pTy_R1.raw
1	LCDFGSASHVADNDITPyLVSR	Y18;	Replicate 1	Unambiguous	PRPF4B	NP_003904.3	8899	serine/threonine-protein kinase PRP4 homolog	1	1	89276756	C2(Carbamidomethyl); Y18(Phospho); R22(Label:13C(6))	1	S(6): 0.0; S(8): 0.0; T(16): 0.0; Y(18): 100.0; S(21): 0.0	1	8601			248900000	Heavy	Redundant	Not	0.957	291100000	241400000	2.31			0	0	2	1262.07	2523.13	-0.65	84.97	21313	21313	CAL27_CURCUMIN_pTy_R1.raw
1	LCDFGSASHVADNDITPyLVSR	Y18;	Replicate 1	Unambiguous	PRPF4B	NP_003904.3	8899	serine/threonine-protein kinase PRP4 homolog	1	1	89276756	C2(Carbamidomethyl); Y18(Phospho)	1	S(6): 0.0; S(8): 0.0; T(16): 0.0; Y(18): 100.0; S(21): 0.0	1						No Quan Values	Not				6.44			0	1	3	839.709	2517.11	0.21	85.11	21350	21350	CAL27_CURCUMIN_pTy_R1.raw
1	LCDFGSASHVADNDITPyLVSR	Y18;	Replicate 1	Unambiguous	PRPF4B	NP_003904.3	8899	serine/threonine-protein kinase PRP4 homolog	1	1	89276756	C2(Carbamidomethyl); Y18(Phospho)	1	S(6): 0.0; S(8): 0.0; T(16): 0.0; Y(18): 99.3; S(21): 0.7	1	8601			291100000	Light	Redundant	Not	0.957	291100000	241400000	2.2			0	0	2	1259.06	2517.11	1.24	83.73	20980	20980	CAL27_CURCUMIN_pTy_R1.raw
1	LQPFHSTELEDDAIySVHVPAGLYR	Y15;	Replicate 1	Unambiguous	GIT1	NP_054749.2	28964	ARF GTPase-activating protein GIT1 isoform 2	2	1	41393573	Y15(Phospho)	1	S(6): 0.0; T(7): 0.0; Y(15): 100.0; S(16): 0.0; Y(24): 0.0	1	12421			39190000	Light	Unique	Used	1.216	39190000	25570000	5.28			0	19	3	979.8	2937.39	1.11	107.46	27352	27352	CAL27_CURCUMIN_pTy_R1.raw
1	HKAPGSADyGFAPAAGR	Y9;	Replicate 1	Unambiguous	C6orf132	NP_001157918.1	647024	uncharacterized protein C6orf132	1	1	256574805	Y9(Phospho)	1	S(6): 0.0; Y(9): 100.0	1	1669	1		7087000	Light	Excluded by Method	Not	100	3175000	5315	4.36			1	39	3	584.933	1752.78	-0.39	40.29	9364	9364	CAL27_CURCUMIN_pTy_R1.raw
1	AGKGESAGyMEPYEAQR	Y9;	Replicate 1	Selected	SHB	NP_003019.2	6461	SH2 domain-containing adapter protein B	1	1	106879210	Y9(Phospho)	1	S(6): 0.0; Y(9): 100.0; Y(13): 0.0	1	1910	1		13810000	Light	Excluded by Method	Not	100	6255000	5315	1.98			1	0	2	962.398	1923.79	-3.3	41.99	9817	9817	CAL27_CURCUMIN_pTy_R1.raw
1	AGKGESAGyMEPYEAQR	Y9;	Replicate 1	Unambiguous	SHB	NP_003019.2	6461	SH2 domain-containing adapter protein B	1	1	106879210	K3(Label:13C(6)); Y9(Phospho); R17(Label:13C(6))	1	S(6): 0.0; Y(9): 100.0; Y(13): 0.0	1	1925	1		5801000	Heavy	Excluded by Method	Not	0.01	5315	2685000	3.82			1	0	2	968.423	1935.84	1.97	42.07	9840	9840	CAL27_CURCUMIN_pTy_R1.raw
1	AGKGESAGyMEPYEAQR	Y9;	Replicate 1	Unambiguous	SHB	NP_003019.2	6461	SH2 domain-containing adapter protein B	1	1	106879210	K3(Label:13C(6)); Y9(Phospho); R17(Label:13C(6))	1	S(6): 0.0; Y(9): 100.0; Y(13): 0.0	1	1931	1		13040000	Heavy	Excluded by Method	Not	0.01	5315	5349000	3.74			1	29	3	645.95	1935.83	-0.21	42.11	9851	9851	CAL27_CURCUMIN_pTy_R1.raw
2	WINQASDESQRMVLTVLPsEPtLPSR	S19; T22;	Replicate 1	Unambiguous	CD101	NP_001243040.1	9398	immunoglobulin superfamily member 2 isoform 2 precursor	2	1	368711318	M12(Oxidation); T15(Phospho); T22(Phospho); R26(Label:13C(6))	1	S(6): 0.2; S(9): 0.2; T(15): 3.6; S(19): 96.1; T(22): 99.8; S(25): 0.2	1				984000000		Inconsistently Labeled	Not				3.41			1	0	3	1046.15	3136.45	-0.78	110.35	28126	28126	CAL27_CURCUMIN_pTy_R1.raw
1	GEPNVSyICSR	Y7;	Replicate 1	Unambiguous	GSK3B	NP_001139628.1	2932	glycogen synthase kinase-3 beta isoform 2	3	1	225903437	Y7(Phospho); C9(Carbamidomethyl)	1	S(6): 0.4; Y(7): 99.6; S(10): 0.0	1						No Quan Values	Not				2.47			0	38	2	681.282	1361.56	0.18	47.73	11364	11364	CAL27_CURCUMIN_pTy_R1.raw
1	GEPNVSyICSR	Y7;	Replicate 1	Unambiguous	GSK3B	NP_001139628.1	2932	glycogen synthase kinase-3 beta isoform 2	3	1	225903437	Y7(Phospho); C9(Carbamidomethyl)	1	S(6): 0.4; Y(7): 99.6; S(10): 0.0	1	2901			2042000000	Light	Unique	Used	0.877	1933000000	1749000000	2.53			0	0	2	681.284	1361.56	3.68	48.32	11524	11524	CAL27_CURCUMIN_pTy_R1.raw
1	GEPNVSyICSR	Y7;	Replicate 1	Unambiguous	GSK3B	NP_001139628.1	2932	glycogen synthase kinase-3 beta isoform 2	3	1	225903437	Y7(Phospho); C9(Carbamidomethyl); R11(Label:13C(6))	1	S(6): 0.4; Y(7): 99.6; S(10): 0.0	1	2901			1749000000	Heavy	Redundant	Not	0.877	1933000000	1749000000	2.18			0	3	2	684.291	1367.58	-0.17	48.33	11525	11525	CAL27_CURCUMIN_pTy_R1.raw
1	GEPNVSyICSR	Y7;	Replicate 1	Unambiguous	GSK3B	NP_001139628.1	2932	glycogen synthase kinase-3 beta isoform 2	3	1	225903437	Y7(Phospho); C9(Carbamidomethyl)	1	S(6): 0.4; Y(7): 99.6; S(10): 0.0	1	2988			2126000000	Light	Unique	Used	0.878	2126000000	1920000000	2.53			0	0	2	681.284	1361.56	3.05	48.88	11674	11674	CAL27_CURCUMIN_pTy_R1.raw
1	GEPNVSyICSR	Y7;	Replicate 1	Unambiguous	GSK3B	NP_001139628.1	2932	glycogen synthase kinase-3 beta isoform 2	3	1	225903437	Y7(Phospho); C9(Carbamidomethyl); R11(Label:13C(6))	1	S(6): 0.4; Y(7): 99.6; S(10): 0.0	1	2988			1920000000	Heavy	Redundant	Not	0.878	2126000000	1920000000	1.97			0	4	2	684.292	1367.58	0.37	49.43	11822	11822	CAL27_CURCUMIN_pTy_R1.raw
1	GEPNVSyICSR	Y7;	Replicate 1	Unambiguous	GSK3B	NP_001139628.1	2932	glycogen synthase kinase-3 beta isoform 2	3	1	225903437	Y7(Phospho); C9(Carbamidomethyl); R11(Label:13C(6))	1	S(6): 0.5; Y(7): 99.5; S(10): 0.0	1	2901			1749000000	Heavy	Redundant	Not	0.877	1933000000	1749000000	2.39			0	39	2	684.292	1367.58	0.1	47.72	11363	11363	CAL27_CURCUMIN_pTy_R1.raw
1	GEPNVSyICSR	Y7;	Replicate 1	Unambiguous	GSK3B	NP_001139628.1	2932	glycogen synthase kinase-3 beta isoform 2	3	1	225903437	Y7(Phospho); C9(Carbamidomethyl)	1	S(6): 0.5; Y(7): 99.5; S(10): 0.0	1	2988			2126000000	Light	Redundant	Not	0.878	2126000000	1920000000	2.52			0	2	2	681.282	1361.56	0.99	49.42	11821	11821	CAL27_CURCUMIN_pTy_R1.raw
1	GEPNVSyICSR	Y7;	Replicate 1	Unambiguous	GSK3B	NP_001139628.1	2932	glycogen synthase kinase-3 beta isoform 2	3	1	225903437	Y7(Phospho); C9(Carbamidomethyl)	1	S(6): 0.5; Y(7): 99.5; S(10): 0.0	1	3155			174600000	Light	Unique	Used	0.8	174600000	173300000	2.46			0	4	2	681.281	1361.56	-0.36	49.97	11968	11968	CAL27_CURCUMIN_pTy_R1.raw
1	GEPNVSyICSR	Y7;	Replicate 1	Unambiguous	GSK3B	NP_001139628.1	2932	glycogen synthase kinase-3 beta isoform 2	3	1	225903437	Y7(Phospho); C9(Carbamidomethyl); R11(Label:13C(6))	1	S(6): 0.5; Y(7): 99.5; S(10): 0.0	1	3155			173300000	Heavy	Redundant	Not	0.8	174600000	173300000	2.42			0	14	2	684.291	1367.57	-0.79	49.98	11969	11969	CAL27_CURCUMIN_pTy_R1.raw
1	GEPNVSyICSR	Y7;	Replicate 1	Unambiguous	GSK3B	NP_001139628.1	2932	glycogen synthase kinase-3 beta isoform 2	3	1	225903437	Y7(Phospho); C9(Carbamidomethyl)	1	S(6): 0.5; Y(7): 99.5; S(10): 0.0	1						No Quan Values	Not				2.62			0	21	2	681.28	1361.55	-1.7	50.55	12124	12124	CAL27_CURCUMIN_pTy_R1.raw
1	GEPNVSyICSR	Y7;	Replicate 1	Unambiguous	GSK3B	NP_001139628.1	2932	glycogen synthase kinase-3 beta isoform 2	3	1	225903437	Y7(Phospho); C9(Carbamidomethyl); R11(Label:13C(6))	1	S(6): 0.5; Y(7): 99.5; S(10): 0.0	1						No Quan Values	Not				2.2			0	18	2	684.291	1367.57	-1.42	50.55	12125	12125	CAL27_CURCUMIN_pTy_R1.raw
1	EDRPISFyQLGSNQLQSNAVSLAR	Y8;	Replicate 1	Unambiguous	ASAP2	NP_001128663.1	8853	arf-GAP with SH3 domain, ANK repeat and PH domain-containing protein 2 isoform b	2	1	206597522	Y8(Phospho)	1	S(6): 0.8; Y(8): 99.2; S(12): 0.0; S(17): 0.0; S(21): 0.0	1						No Quan Values	Not				4.09			0	41	3	925.118	2773.34	2.71	93.4	23573	23573	CAL27_CURCUMIN_pTy_R1.raw
1	HGNRNSNSYGIPEPAHAyAQPQTTTPLPAVSGSPGAAITPLPSTQNGPVFAK	Y18;	Replicate 1	Unambiguous	CRKL	NP_005198.1	1399	crk-like protein	1	1	4885153	Y9(Phospho); Y18(Phospho)	1	S(6): 33.3; S(8): 33.3; Y(9): 33.3; Y(18): 99.8; T(23): 0.1; T(24): 0.1; T(25): 0.1; S(31): 0.0; S(33): 0.0; T(39): 0.0; S(43): 0.0; T(44): 0.0	1	10625			456700000	Light	Redundant	Not	0.693	359100000	411300000	6.4			1	0	4	1357.4	5426.56	0.23	97.24	24607	24607	CAL27_CURCUMIN_pTy_R1.raw
1	HGNRNSNSYGIPEPAHAyAQPQTTTPLPAVSGSPGAAITPLPSTQNGPVFAK	Y18;	Replicate 1	Unambiguous	CRKL	NP_005198.1	1399	crk-like protein	1	1	4885153	S6(Phospho); S8(Phospho)	1	S(6): 33.4; S(8): 33.4; Y(9): 33.4; Y(18): 99.7; T(23): 0.1; T(24): 0.1; T(25): 0.1; S(31): 0.0; S(33): 0.0; T(39): 0.0; S(43): 0.0; T(44): 0.0	1	10625			456700000	Light	Unique	Used	0.693	359100000	411300000	6.41			1	0	4	1357.4	5426.58	3.38	96.56	24424	24424	CAL27_CURCUMIN_pTy_R1.raw
1	VAQQPLSLVGCEVVPDPSPDHLySFR	Y23;	Replicate 1	Unambiguous	AFAP1L2	NP_115939.1	84632	actin filament-associated protein 1-like 2 isoform 2	3	1	24308338	C11(Carbamidomethyl); Y23(Phospho)	1	S(7): 0.0; S(18): 0.0; Y(23): 99.1; S(24): 0.9	1	11778			729400000	Light	Redundant	Not	0.926	698400000	598300000	6.59			0	2	3	997.477	2990.42	1.26	103.69	26339	26339	CAL27_CURCUMIN_pTy_R1.raw
1	VAQQPLSLVGCEVVPDPSPDHLySFR	Y23;	Replicate 1	Unambiguous	AFAP1L2	NP_115939.1	84632	actin filament-associated protein 1-like 2 isoform 2	3	1	24308338	C11(Carbamidomethyl); Y23(Phospho)	1	S(7): 0.0; S(18): 0.0; Y(23): 99.2; S(24): 0.8	1	11778			729400000	Light	Redundant	Not	0.926	698400000	598300000	6.8			0	2	3	997.475	2990.41	-0.88	104.3	26501	26501	CAL27_CURCUMIN_pTy_R1.raw
1	LEPQIASASEyAHR	Y11;	Replicate 1	Unambiguous	PLIN3	NP_001157666.1	10226	perilipin-3 isoform 3	3	1	255958306	Y11(Phospho)	1	S(7): 0.0; S(9): 0.0; Y(11): 100.0	1	2786			13150000	Light	Unique	Used	4.427	12690000	2274000	3.59			0	31	3	551.255	1651.75	1.38	47.53	11309	11309	CAL27_CURCUMIN_pTy_R1.raw
1	GIRPFPSEETTENDDDVyR	Y18;	Replicate 1	Unambiguous	VAV2	NP_003362.2	7410	guanine nucleotide exchange factor VAV2 isoform 2	2	1	40549448	Y18(Phospho)	1	S(7): 0.0; T(10): 0.0; T(11): 0.0; Y(18): 100.0	1	4511		1	37480000	Light	Excluded by Method	Not	3.6921	11030000	2371000	4.37			0	16	3	773.996	2319.97	-1.01	58.24	14177	14177	CAL27_CURCUMIN_pTy_R1.raw
1	GIRPFPSEETTENDDDVyR	Y18;	Replicate 1	Unambiguous	VAV2	NP_003362.2	7410	guanine nucleotide exchange factor VAV2 isoform 2	2	1	40549448	Y18(Phospho)	1	S(7): 0.0; T(10): 0.0; T(11): 0.0; Y(18): 100.0	1	4511		1	37480000	Light	Excluded by Method	Not	3.6921	11030000	2371000	3.83			0	21	3	773.998	2319.98	0.65	58.8	14327	14327	CAL27_CURCUMIN_pTy_R1.raw
2	MAGFDGSAWDEEEEEPPDHQyyNDFPGK	Y21; Y22;	Replicate 1	Unambiguous	SHC1	NP_001189788.1	6464	SHC-transforming protein 1 isoform 5 precursor	5	1	322302755	Y21(Phospho); Y22(Phospho)	1	S(7): 0.0; Y(21): 100.0; Y(22): 100.0	1	8830			55320000	Light	Unique	Used	1.516	55320000	28960000	3.63			0	0	3	1140.75	3420.24	-0.28	85.82	21539	21539	CAL27_CURCUMIN_pTy_R1.raw
2	MAGFDGSAWDEEEEEPPDHQyyNDFPGKEPPLGGVVDMR	Y21; Y22;	Replicate 1	Unambiguous	SHC1	NP_001189788.1	6464	SHC-transforming protein 1 isoform 5 precursor	5	1	322302755	Y21(Phospho); Y22(Phospho)	1	S(7): 0.0; Y(21): 100.0; Y(22): 100.0	1	12320			139600000	Light	Unique	Used	1.237	139600000	89500000	4.82			1	0	3	1524.28	4570.83	1.63	107.2	27280	27280	CAL27_CURCUMIN_pTy_R1.raw
2	MAGFDGSAWDEEEEEPPDHQyyNDFPGKEPPLGGVVDMR	Y21; Y22;	Replicate 1	Unambiguous	SHC1	NP_001189788.1	6464	SHC-transforming protein 1 isoform 5 precursor	5	1	322302755	Y21(Phospho); Y22(Phospho); K28(Label:13C(6)); R39(Label:13C(6))	1	S(7): 0.0; Y(21): 100.0; Y(22): 100.0	1	12320			126300000	Heavy	Redundant	Not	1.237	139600000	89500000	4.4			1	0	3	1528.29	4582.86	0.99	107.58	27383	27383	CAL27_CURCUMIN_pTy_R1.raw
2	MAGFDGSAWDEEEEEPPDHQyyNDFPGKEPPLGGVVDMR	Y21; Y22;	Replicate 1	Unambiguous	SHC1	NP_001189788.1	6464	SHC-transforming protein 1 isoform 5 precursor	5	1	322302755	Y21(Phospho); Y22(Phospho)	1	S(7): 0.0; Y(21): 100.0; Y(22): 100.0	1	12477			86500000	Light	Unique	Used	1.891	64090000	26890000	4.36			1	0	3	1524.28	4570.82	1.15	107.81	27444	27444	CAL27_CURCUMIN_pTy_R1.raw
2	MAGFDGSAWDEEEEEPPDHQyyNDFPGKEPPLGGVVDMR	Y21; Y22;	Replicate 1	Unambiguous	SHC1	NP_001189788.1	6464	SHC-transforming protein 1 isoform 5 precursor	5	1	322302755	Y21(Phospho); Y22(Phospho)	1	S(7): 0.0; Y(21): 100.0; Y(22): 100.0	1	12575			339600000	Light	Unique	Used	1.483	339600000	181700000	8.3			1	4	4	1143.46	4570.82	-0.12	108.42	27608	27608	CAL27_CURCUMIN_pTy_R1.raw
1	MAGFDGSAWDEEEEEPPDHQyYNDFPGKEPPLGGVVDMR	Y21;	Replicate 1	Unambiguous	SHC1	NP_001189788.1	6464	SHC-transforming protein 1 isoform 5 precursor	5	1	322302755	Y22(Phospho)	1	S(7): 0.0; Y(21): 98.1; Y(22): 1.9	1	12264			392700000	Light	Unique	Used	3.602	374400000	82480000	6.35			1	2	4	1123.47	4490.85	-0.77	106.59	27118	27118	CAL27_CURCUMIN_pTy_R1.raw
1	VAEDLESEGLMAEEVQAVQQQEVyGMMPR	Y24;	Replicate 1	Unambiguous	SPTAN1	NP_001182461.1	6709	spectrin alpha chain, non-erythrocytic 1 isoform 3	3	1	306966132	Y24(Phospho)	1	S(7): 0.0; Y(24): 100.0	1	14568			33080000	Light	Unique	Used	4.124	30360000	5841000	5.44			0	3	3	1116.16	3346.47	-0.05	120.69	30900	30900	CAL27_CURCUMIN_pTy_R1.raw
1	ELFDDPSyVNVQNLDK	Y8;	Replicate 1	Unambiguous	SHC1	NP_001189788.1	6464	SHC-transforming protein 1 isoform 5 precursor	5	1	322302755	Y8(Phospho)	1	S(7): 0.0; Y(8): 100.0	1	9185			243000000	Light	Unique	Used	1.579	240400000	120800000	4.47			0	8	2	988.439	1975.87	0.94	88.27	22197	22197	CAL27_CURCUMIN_pTy_R1.raw
2	MAGFDGSAWDEEEEEPPDHQyyNDFPGKEPPLGGVVDMR	Y21; Y22;	Replicate 1	Unambiguous	SHC1	NP_001189788.1	6464	SHC-transforming protein 1 isoform 5 precursor	5	1	322302755	Y21(Phospho); Y22(Phospho)	1	S(7): 0.1; Y(21): 100.0; Y(22): 100.0	1	12441			1509000000	Light	Unique	Used	1.5	1448000000	765500000	8.5			1	2	4	1143.46	4570.82	1.05	107.57	27382	27382	CAL27_CURCUMIN_pTy_R1.raw
2	MAGFDGSAWDEEEEEPPDHQyyNDFPGKEPPLGGVVDMR	Y21; Y22;	Replicate 1	Unambiguous	SHC1	NP_001189788.1	6464	SHC-transforming protein 1 isoform 5 precursor	5	1	322302755	Y21(Phospho); Y22(Phospho); M38(Oxidation)	1	S(7): 0.1; Y(21): 99.9; Y(22): 99.9	1	10946		1	13450000	Light	Excluded by Method	Not	7.36755	5361000	577500	6.55			1	6	4	1147.46	4586.82	0.99	98.58	24966	24966	CAL27_CURCUMIN_pTy_R1.raw
2	MAGFDGSAWDEEEEEPPDHQyyNDFPGKEPPLGGVVDMR	Y21; Y22;	Replicate 1	Unambiguous	SHC1	NP_001189788.1	6464	SHC-transforming protein 1 isoform 5 precursor	5	1	322302755	M1(Oxidation); Y21(Phospho); Y22(Phospho)	1	S(7): 0.1; Y(21): 99.9; Y(22): 99.9	1				3311000		No Quan Values	Not				6.41			1	11	4	1147.46	4586.82	1.41	102.28	25960	25960	CAL27_CURCUMIN_pTy_R1.raw
2	MAGFDGSAWDEEEEEPPDHQyyNDFPGKEPPLGGVVDMR	Y21; Y22;	Replicate 1	Unambiguous	SHC1	NP_001189788.1	6464	SHC-transforming protein 1 isoform 5 precursor	5	1	322302755	Y21(Phospho); Y22(Phospho); K28(Label:13C(6)); R39(Label:13C(6))	1	S(7): 0.1; Y(21): 99.9; Y(22): 99.9	1	12575			181700000	Heavy	Redundant	Not	1.483	339600000	181700000	3.93			1	7	4	1146.47	4582.86	0.36	108.58	27650	27650	CAL27_CURCUMIN_pTy_R1.raw
1	ELFDDPSyVNVQNLDK	Y8;	Replicate 1	Unambiguous	SHC1	NP_001189788.1	6464	SHC-transforming protein 1 isoform 5 precursor	5	1	322302755	Y8(Phospho)	1	S(7): 0.5; Y(8): 99.5	1	9185			243000000	Light	Redundant	Not	1.579	240400000	120800000	3.21			0	7	2	988.439	1975.87	0.82	87.7	22045	22045	CAL27_CURCUMIN_pTy_R1.raw
1	ELFDDPSyVNVQNLDK	Y8;	Replicate 1	Unambiguous	SHC1	NP_001189788.1	6464	SHC-transforming protein 1 isoform 5 precursor	5	1	322302755	Y8(Phospho); K16(Label:13C(6))	1	S(7): 0.5; Y(8): 99.5	1	9185			120800000	Heavy	Redundant	Not	1.579	240400000	120800000	4.45			0	3	2	991.449	1981.89	0.7	88.16	22169	22169	CAL27_CURCUMIN_pTy_R1.raw
2	MAGFDGSAWDEEEEEPPDHQyyNDFPGKEPPLGGVVDMR	Y21; Y22;	Replicate 1	Unambiguous	SHC1	NP_001189788.1	6464	SHC-transforming protein 1 isoform 5 precursor	5	1	322302755	Y21(Phospho); Y22(Phospho)	1	S(7): 4.2; Y(21): 97.9; Y(22): 97.9	1	12477			86500000	Light	Redundant	Not	1.891	64090000	26890000	2.38			1	0	3	1524.28	4570.82	-0.29	108.43	27610	27610	CAL27_CURCUMIN_pTy_R1.raw
1	FIHQQPQSSSPVyGSSAK	Y13;	Replicate 1	Unambiguous	PXN	NP_002850.2	5829	paxillin isoform 1	3	1	170932516	Y13(Phospho); K18(Label:13C(6))	1	S(8): 0.0; S(9): 0.0; S(10): 0.0; Y(13): 100.0; S(15): 0.0; S(16): 0.0	1	1127			305500000	Heavy	Redundant	Not	1.099	423200000	305500000	4.78			0	7	3	678.652	2033.94	-0.25	37.01	8474	8474	CAL27_CURCUMIN_pTy_R1.raw
1	FIHQQPQSSSPVyGSSAK	Y13;	Replicate 1	Unambiguous	PXN	NP_002850.2	5829	paxillin isoform 1	3	1	170932516	Y13(Phospho)	1	S(8): 0.0; S(9): 0.0; S(10): 0.0; Y(13): 100.0; S(15): 0.0; S(16): 0.0	1	1131			75010000	Light	Redundant	Not	1.103	73890000	53170000	3.89			0	0	2	1014.47	2027.92	0.35	37.01	8475	8475	CAL27_CURCUMIN_pTy_R1.raw
1	FIHQQPQSSSPVyGSSAK	Y13;	Replicate 1	Unambiguous	PXN	NP_002850.2	5829	paxillin isoform 1	3	1	170932516	Y13(Phospho); K18(Label:13C(6))	1	S(8): 0.0; S(9): 0.0; S(10): 0.0; Y(13): 100.0; S(15): 0.0; S(16): 0.0	1	1131			53170000	Heavy	Redundant	Not	1.103	73890000	53170000	4.01			0	1	2	1017.48	2033.94	0.42	37.09	8496	8496	CAL27_CURCUMIN_pTy_R1.raw
1	FIHQQPQSSSPVyGSSAK	Y13;	Replicate 1	Unambiguous	PXN	NP_002850.2	5829	paxillin isoform 1	3	1	170932516	Y13(Phospho); K18(Label:13C(6))	1	S(8): 0.0; S(9): 0.0; S(10): 0.0; Y(13): 100.0; S(15): 0.0; S(16): 0.0	1	1127			305500000	Heavy	Redundant	Not	1.099	423200000	305500000	2.33			0	41	3	678.651	2033.94	-2.14	37.55	8622	8622	CAL27_CURCUMIN_pTy_R1.raw
1	FIHQQPQSSSPVyGSSAK	Y13;	Replicate 1	Unambiguous	PXN	NP_002850.2	5829	paxillin isoform 1	3	1	170932516	Y13(Phospho); K18(Label:13C(6))	1	S(8): 0.0; S(9): 0.0; S(10): 0.0; Y(13): 98.3; S(15): 0.8; S(16): 0.8	1	1127			305500000	Heavy	Redundant	Not	1.099	423200000	305500000	2.88			0	28	3	678.653	2033.94	1.1	36.49	8336	8336	CAL27_CURCUMIN_pTy_R1.raw
1	FIHQQPQSSSPVyGSSAK	Y13;	Replicate 1	Unambiguous	PXN	NP_002850.2	5829	paxillin isoform 1	3	1	170932516	Y13(Phospho)	1	S(8): 0.0; S(9): 0.0; S(10): 0.0; Y(13): 98.6; S(15): 0.7; S(16): 0.7	1	1127			423200000	Light	Redundant	Not	1.099	423200000	305500000	3.54			0	0	3	676.645	2027.92	-1.34	36.46	8328	8328	CAL27_CURCUMIN_pTy_R1.raw
1	FIHQQPQSSSPVyGSSAK	Y13;	Replicate 1	Unambiguous	PXN	NP_002850.2	5829	paxillin isoform 1	3	1	170932516	Y13(Phospho)	1	S(8): 0.0; S(9): 0.0; S(10): 0.0; Y(13): 99.2; S(15): 0.8; S(16): 0.0	1	1127			423200000	Light	Redundant	Not	1.099	423200000	305500000	2.85			0	26	3	676.644	2027.92	-2.33	37.55	8621	8621	CAL27_CURCUMIN_pTy_R1.raw
1	FIHQQPQSSSPVyGSSAK	Y13;	Replicate 1	Unambiguous	PXN	NP_002850.2	5829	paxillin isoform 1	3	1	170932516	Y13(Phospho)	1	S(8): 0.0; S(9): 0.0; S(10): 0.0; Y(13): 99.3; S(15): 0.6; S(16): 0.0	1	1127			423200000	Light	Unique	Used	1.099	423200000	305500000	5.58			0	0	3	676.647	2027.93	2.54	37	8471	8471	CAL27_CURCUMIN_pTy_R1.raw
2	FIHQQPQSSsPVyGSSAK	S10; Y13;	Replicate 1	Unambiguous	PXN	NP_002850.2	5829	paxillin isoform 1	3	1	170932516	S10(Phospho); S15(Phospho)	1	S(8): 0.0; S(9): 0.0; S(10): 100.0; Y(13): 98.8; S(15): 1.2; S(16): 0.0	1	833			42510000	Light	Redundant	Not	0.949	41920000	35050000	3.82			0	25	3	703.301	2107.89	-0.66	34.62	7833	7833	CAL27_CURCUMIN_pTy_R1.raw
2	FIHQQPQSSsPVyGSSAK	S10; Y13;	Replicate 1	Unambiguous	PXN	NP_002850.2	5829	paxillin isoform 1	3	1	170932516	S10(Phospho); S15(Phospho); K18(Label:13C(6))	1	S(8): 0.0; S(9): 0.0; S(10): 100.0; Y(13): 98.9; S(15): 1.1; S(16): 0.0	1	833			35050000	Heavy	Unique	Used	0.949	41920000	35050000	4.37			0	7	3	705.308	2113.91	-0.05	34.84	7890	7890	CAL27_CURCUMIN_pTy_R1.raw
2	FIHQQPQSSsPVyGSSAK	S10; Y13;	Replicate 1	Unambiguous	PXN	NP_002850.2	5829	paxillin isoform 1	3	1	170932516	S10(Phospho); S15(Phospho); K18(Label:13C(6))	1	S(8): 0.0; S(9): 1.5; S(10): 98.5; Y(13): 97.1; S(15): 1.4; S(16): 1.4	1	833			35050000	Heavy	Redundant	Not	0.949	41920000	35050000	2.41			0	17	3	705.308	2113.91	-0.05	34.29	7745	7745	CAL27_CURCUMIN_pTy_R1.raw
1	LNGPQDHSHLLySTIPR	Y12;	Replicate 1	Unambiguous	CTNND1	NP_001193818.1	1500	catenin delta-1 isoform 2A	10	1	332688218	Y12(Phospho)	1	S(8): 0.0; Y(12): 98.5; S(13): 0.7; T(14): 0.7	1	5351			47390000	Light	Unique	Used	4.324	47390000	8698000	5.06			0	9	3	676.662	2027.97	1.36	63.76	15649	15649	CAL27_CURCUMIN_pTy_R1.raw
1	LNGPQDHSHLLySTIPR	Y12;	Replicate 1	Unambiguous	CTNND1	NP_001193818.1	1500	catenin delta-1 isoform 2A	10	1	332688218	Y12(Phospho)	1	S(8): 0.0; Y(12): 99.4; S(13): 0.6; T(14): 0.0	1	5351			47390000	Light	Redundant	Not	4.324	47390000	8698000	4.72			0	45	3	676.662	2027.97	0.1	63.2	15499	15499	CAL27_CURCUMIN_pTy_R1.raw
1	FIHQQPQSSSPVyGSSAK	Y13;	Replicate 1	Unambiguous	PXN	NP_002850.2	5829	paxillin isoform 1	3	1	170932516	S10(Phospho); S15(Phospho); K18(Label:13C(6))	1	S(8): 33.3; S(9): 33.3; S(10): 33.3; Y(13): 100.0; S(15): 0.0; S(16): 0.0	1	868			10900000	Heavy	Unique	Used	0.936	12860000	10900000	2.34			0	2	2	1057.46	2113.91	0.91	34.87	7898	7898	CAL27_CURCUMIN_pTy_R1.raw
1	QPAPKPEPSFSEyASVQVPR	Y13;	Replicate 1	Unambiguous	SIRPA	NP_001035112.1	140885	tyrosine-protein phosphatase non-receptor type substrate 1 precursor	1	1	91105767	K5(Label:13C(6)); Y13(Phospho); R20(Label:13C(6))	1	S(9): 0.0; S(11): 0.0; Y(13): 100.0; S(15): 0.0	1	6011		1	10970000	Heavy	Excluded by Method	Not	0.299686	1595000	4224000	2.42			0	41	3	769.382	2306.13	1.99	67.12	16551	16551	CAL27_CURCUMIN_pTy_R1.raw
1	LGAAPEEESAyVAGEKR	Y11;	Replicate 1	Unambiguous	NSFL1C	NP_057227.2	55968	NSFL1 cofactor p47 isoform a	2	1	20149635	Y11(Phospho)	1	S(9): 0.0; Y(11): 100.0	1	2374		1	29410000	Light	Excluded by Method	Not	7.53383	9654000	1017000	3.64			1	14	3	619.618	1856.84	-1.48	44.83	10585	10585	CAL27_CURCUMIN_pTy_R1.raw
1	LGAAPEEESAyVAGEK	Y11;	Replicate 1	Unambiguous	NSFL1C	NP_057227.2	55968	NSFL1 cofactor p47 isoform a	2	1	20149635	Y11(Phospho)	1	S(9): 0.5; Y(11): 99.5	1	2680	1		3593000	Light	Excluded by Method	Not	100	1970000	5315	2.9			0	0	2	850.874	1700.74	-0.54	46.85	11132	11132	CAL27_CURCUMIN_pTy_R1.raw
1	QPAPKPEPSFSEyASVQVPR	Y13;	Replicate 1	Unambiguous	SIRPA	NP_001035112.1	140885	tyrosine-protein phosphatase non-receptor type substrate 1 precursor	1	1	91105767	Y13(Phospho)	1	S(9): 1.3; S(11): 1.3; Y(13): 97.5; S(15): 0.0	1	5988		1	815300	Light	Excluded by Method	Not	0.305075	815300	2121000	2.54			0	0	3	765.366	2294.08	-0.81	66.98	16514	16514	CAL27_CURCUMIN_pTy_R1.raw
1	TVQPVAMGPDGLPVDASSVSNNyIQTLGR	Y23;	Replicate 1	Unambiguous	CTNND1	NP_001193818.1	1500	catenin delta-1 isoform 2A	15	1	332688218	Y23(Phospho)	1	T(1): 0.0; S(17): 0.0; S(18): 0.0; S(20): 0.0; Y(23): 100.0; T(26): 0.0	1	10653			71330000	Light	Unique	Used	4.227	52660000	9885000	7.08			0	4	3	1022.83	3066.46	0.77	96.74	24471	24471	CAL27_CURCUMIN_pTy_R1.raw
1	TSSESIYSRPGSSIPGSPGHTIyAK	Y23;	Replicate 1	Unambiguous	ABLIM1	NP_006711.3	3983	actin-binding LIM protein 1 isoform s	4	1	51173717	Y23(Phospho)	1	T(1): 0.0; S(2): 0.0; S(3): 0.0; S(5): 0.0; Y(7): 0.0; S(8): 0.0; S(12): 0.0; S(13): 0.0; S(17): 0.0; T(21): 1.0; Y(23): 99.0	1	4588	1		4872000	Light	Excluded by Method	Not	100	1484000	5315	3.08			0	40	3	887.085	2659.24	-0.37	58.72	14307	14307	CAL27_CURCUMIN_pTy_R1.raw
1	TPsFELPDASERPPTYCELVPR	S3;	Replicate 1	Unambiguous	SH2D3A	NP_005481.2	10045	SH2 domain-containing protein 3A	1	1	208609985	S3(Phospho); S10(Phospho); C17(Carbamidomethyl)	1	T(1): 0.0; S(3): 100.0; S(10): 0.0; T(15): 50.0; Y(16): 50.0	1	10177			19990000	Light	Unique	Used	2.562	19410000	6011000	3.15			0	42	3	907.728	2721.17	1.46	93.81	23684	23684	CAL27_CURCUMIN_pTy_R1.raw
1	TAASGVEANSRPLDHAQPPSSLVIDKESEVyK	Y31;	Replicate 1	Unambiguous	PDLIM1	NP_066272.1	9124	PDZ and LIM domain protein 1	1	1	13994151	Y31(Phospho)	1	T(1): 0.0; S(4): 0.0; S(10): 0.0; S(20): 0.0; S(21): 0.0; S(28): 0.0; Y(31): 100.0	1	5732			19050000	Light	Unique	Used	2.766	18100000	5193000	3.81			1	0	4	869.675	3475.68	1.26	65.5	16116	16116	CAL27_CURCUMIN_pTy_R1.raw
1	TADSVFCPHyEK	Y10;	Replicate 1	Unambiguous	EFNB2	NP_004084.1	1948	ephrin-B2 precursor	1	1	4758250	C7(Carbamidomethyl); Y10(Phospho)	1	T(1): 0.0; S(4): 0.0; Y(10): 100.0	1	2615			2422000	Light	Unique	Used	1.42	2422000	1354000	2.81			0	12	2	767.308	1533.61	0.52	46.45	11022	11022	CAL27_CURCUMIN_pTy_R1.raw
2	THAVSVSETDDyAEIIDEEDTyTMPSTR	Y12; Y22;	Replicate 1	Unambiguous	PTK2	NP_722560.1	5747	focal adhesion kinase 1 isoform a	3	1	24476013	Y12(Phospho); Y22(Phospho); R28(Label:13C(6))	1	T(1): 0.0; S(5): 0.0; S(7): 0.0; T(9): 0.0; Y(12): 100.0; T(21): 0.9; Y(22): 98.2; T(23): 0.9; S(26): 0.0; T(27): 0.0	1	7777			56870000	Heavy	Unique	Used	0.423	26180000	49160000	7.15			0	5	3	1114.45	3341.35	1.25	78.25	19526	19526	CAL27_CURCUMIN_pTy_R1.raw
2	THAVSVSETDDyAEIIDEEDTyTMPSTR	Y12; Y22;	Replicate 1	Unambiguous	PTK2	NP_722560.1	5747	focal adhesion kinase 1 isoform a	3	1	24476013	Y12(Phospho); Y22(Phospho); R28(Label:13C(6))	1	T(1): 0.0; S(5): 1.0; S(7): 1.0; T(9): 1.0; Y(12): 97.0; T(21): 1.0; Y(22): 98.0; T(23): 1.0; S(26): 0.0; T(27): 0.0	1	7777			56870000	Heavy	Redundant	Not	0.423	26180000	49160000	3.42			0	4	3	1114.45	3341.34	0.37	78.84	19686	19686	CAL27_CURCUMIN_pTy_R1.raw
1	TFLRPSPEDEAIyGPNTK	Y13;	Replicate 1	Unambiguous	TJP2	NP_001163886.1	9414	tight junction protein ZO-2 isoform 4	6	1	282165804	Y13(Phospho)	1	T(1): 0.0; S(6): 0.0; Y(13): 99.2; T(17): 0.8	1	5580		1	5010000	Light	Excluded by Method	Not	14.3753	1601000	88390	3.38			0	31	3	705.666	2114.98	1.54	64.58	15871	15871	CAL27_CURCUMIN_pTy_R1.raw
1	TTSYPTPRPYPKPAPSSGKDyV	Y21;	Replicate 1	Unambiguous	CLDN1	NP_066924.1	9076	claudin-1	1	1	10863887	R8(Label:13C(6)); K12(Label:13C(6)); K19(Label:13C(6)); Y21(Phospho)	1	T(1): 0.0; T(2): 0.0; S(3): 0.0; Y(4): 0.0; T(6): 0.0; Y(10): 0.0; S(16): 0.0; S(17): 0.0; Y(21): 100.0	1	3656			12660000	Heavy	Redundant	Not	2.007	32000000	12660000	2.43			1	0	3	836.419	2507.24	2.64	53.55	12927	12927	CAL27_CURCUMIN_pTy_R1.raw
1	TTSYPTPRPYPKPAPSSGKDyV	Y21;	Replicate 1	Unambiguous	CLDN1	NP_066924.1	9076	claudin-1	1	1	10863887	Y21(Phospho)	1	T(1): 0.0; T(2): 0.0; S(3): 0.0; Y(4): 0.0; T(6): 0.0; Y(10): 0.0; S(16): 0.0; S(17): 0.0; Y(21): 100.0	1	3656			33390000	Light	Unique	Used	2.007	32000000	12660000	3.67			1	0	3	830.397	2489.18	1.03	53.65	12952	12952	CAL27_CURCUMIN_pTy_R1.raw
1	TTEDEVHICHNQDGySYPSR	Y15;	Replicate 1	Unambiguous	LDLR	NP_001182728.1	3949	low-density lipoprotein receptor isoform 3 precursor	4	1	307775414	C9(Carbamidomethyl); Y15(Phospho); R20(Label:13C(6))	1	T(1): 0.0; T(2): 0.0; Y(15): 98.5; S(16): 0.7; Y(17): 0.7; S(19): 0.0	1	2091			37530000	Heavy	Redundant	Not	0.843	39510000	37180000	4.25			0	3	3	832.008	2494.01	0.56	43.67	10272	10272	CAL27_CURCUMIN_pTy_R1.raw
1	TTEDEVHICHNQDGySYPSR	Y15;	Replicate 1	Unambiguous	LDLR	NP_001182728.1	3949	low-density lipoprotein receptor isoform 3 precursor	4	1	307775414	C9(Carbamidomethyl); Y15(Phospho)	1	T(1): 0.0; T(2): 0.0; Y(15): 99.4; S(16): 0.6; Y(17): 0.0; S(19): 0.0	1	2091			39510000	Light	Unique	Used	0.843	39510000	37180000	5.26			0	0	3	830	2487.99	-0.4	43.2	10147	10147	CAL27_CURCUMIN_pTy_R1.raw
1	TTVyVVEDQR	Y4;	Replicate 1	Unambiguous	CYSTM1	NP_115788.1	84418	cysteine-rich and transmembrane domain-containing protein 1	1	1	14165278	Y4(Phospho)	1	T(1): 0.0; T(2): 0.0; Y(4): 100.0	1	1580			11160000	Light	Unique	Used	4.365	9851000	1791000	2.3			0	55	2	645.293	1289.58	0.34	39.72	9210	9210	CAL27_CURCUMIN_pTy_R1.raw
1	TTVyVVEDQR	Y4;	Replicate 1	Unambiguous	CYSTM1	NP_115788.1	84418	cysteine-rich and transmembrane domain-containing protein 1	1	1	14165278	Y4(Phospho)	1	T(1): 0.0; T(2): 0.0; Y(4): 100.0	1	1580			11160000	Light	Redundant	Not	4.365	9851000	1791000	2.29			0	49	2	645.292	1289.58	-0.03	39.73	9213	9213	CAL27_CURCUMIN_pTy_R1.raw
1	TAGTSFMMTPYVVtR	T14;	Replicate 1	Unambiguous	MAPK10	NP_620447.1	5602	mitogen-activated protein kinase 10 isoform 4	9	1	20986508	T14(Phospho); R15(Label:13C(6))	1	T(1): 0.0; T(4): 0.0; S(5): 0.0; T(9): 0.0; Y(11): 0.6; T(14): 99.3	1				6236000		No Quan Values	Not				2.99			0	4	2	874.399	1747.79	0.7	86.82	21808	21808	CAL27_CURCUMIN_pTy_R1.raw
1	TAGTSFMMTPYVVtR	T14;	Replicate 1	Unambiguous	MAPK10	NP_620447.1	5602	mitogen-activated protein kinase 10 isoform 4	9	1	20986508	Y11(Phospho); R15(Label:13C(6))	1	T(1): 0.0; T(4): 0.0; S(5): 0.0; T(9): 0.0; Y(11): 0.6; T(14): 99.4	1						No Quan Values	Not				2.3			0	21	2	874.4	1747.79	2.51	86.22	21648	21648	CAL27_CURCUMIN_pTy_R1.raw
1	TAGTSFMMTPyVVTR	Y11;	Replicate 1	Unambiguous	MAPK10	NP_620447.1	5602	mitogen-activated protein kinase 10 isoform 4	9	1	20986508	Y11(Phospho)	1	T(1): 0.0; T(4): 0.0; S(5): 0.0; T(9): 0.7; Y(11): 98.6; T(14): 0.7	1				48790000		No Quan Values	Not				2.63			0	51	2	871.389	1741.77	1.11	86.16	21630	21630	CAL27_CURCUMIN_pTy_R1.raw
1	TACTNFMMTPyVVTR	Y11;	Replicate 1	Unambiguous	MAPK9	NP_001128516.1	5601	mitogen-activated protein kinase 9 isoform JNK2 gamma	5	1	205277412	C3(Carbamidomethyl); Y11(Phospho)	1	T(1): 0.0; T(4): 0.0; T(9): 0.0; Y(11): 100.0; T(14): 0.0	1	9033			10510000	Light	Unique	Used	2.129	7416000	2764000	2.4			0	23	3	624.601	1871.79	-0.31	86.59	21747	21747	CAL27_CURCUMIN_pTy_R1.raw
1	TACTNFMMTPyVVTR	Y11;	Replicate 1	Unambiguous	MAPK9	NP_001128516.1	5601	mitogen-activated protein kinase 9 isoform JNK2 gamma	5	1	205277412	C3(Carbamidomethyl); Y11(Phospho)	1	T(1): 0.0; T(4): 0.0; T(9): 0.6; Y(11): 98.7; T(14): 0.6	1	8977			24040000	Light	Redundant	Not	1.537	24040000	12410000	3.12			0	0	2	936.4	1871.79	1.52	86.23	21649	21649	CAL27_CURCUMIN_pTy_R1.raw
1	TACTNFMMTPyVVTR	Y11;	Replicate 1	Unambiguous	MAPK9	NP_001128516.1	5601	mitogen-activated protein kinase 9 isoform JNK2 gamma	5	1	205277412	C3(Carbamidomethyl); Y11(Phospho)	1	T(1): 0.0; T(4): 0.0; T(9): 0.6; Y(11): 99.4; T(14): 0.0	1	8977			24040000	Light	Redundant	Not	1.537	24040000	12410000	3.47			0	35	2	936.399	1871.79	0.48	86.8	21804	21804	CAL27_CURCUMIN_pTy_R1.raw
2	TACTNFMMtPyVVTR	T9; Y11;	Replicate 1	Unambiguous	MAPK9	NP_001128516.1	5601	mitogen-activated protein kinase 9 isoform JNK2 gamma	5	1	205277412	C3(Carbamidomethyl); T9(Phospho); T14(Phospho)	1	T(1): 0.0; T(4): 0.0; T(9): 100.0; Y(11): 100.0; T(14): 0.0	1	8193			10080000	Light	Redundant	Not	1.46	10080000	5478000	3.66			0	41	2	976.383	1951.76	1.39	81.36	20361	20361	CAL27_CURCUMIN_pTy_R1.raw
2	TACTNFMMtPyVVTR	T9; Y11;	Replicate 1	Unambiguous	MAPK9	NP_001128516.1	5601	mitogen-activated protein kinase 9 isoform JNK2 gamma	5	1	205277412	C3(Carbamidomethyl); T9(Phospho); T14(Phospho); R15(Label:13C(6))	1	T(1): 0.0; T(4): 0.0; T(9): 100.0; Y(11): 100.0; T(14): 0.0	1	8298			3308000	Heavy	Unique	Used	1.191	4627000	3082000	2.63			0	0	2	979.392	1957.78	0.7	81.68	20446	20446	CAL27_CURCUMIN_pTy_R1.raw
1	TEGTyDLPYWDR	Y5;	Replicate 1	Unambiguous	DCBLD2	NP_563615.3	131566	discoidin, CUB and LCCL domain-containing protein 2 precursor	1	1	54792129	Y5(Phospho)	1	T(1): 0.0; T(4): 0.5; Y(5): 99.5; Y(9): 0.0	1	7319		1	7904000	Light	Excluded by Method	Not	4.54789	3774000	658600	2.65			0	10	2	798.323	1595.64	-1.85	75.22	18719	18719	CAL27_CURCUMIN_pTy_R1.raw
1	TEGTyDLPYWDR	Y5;	Replicate 1	Unambiguous	DCBLD2	NP_563615.3	131566	discoidin, CUB and LCCL domain-containing protein 2 precursor	1	1	54792129	Y5(Phospho)	1	T(1): 0.0; T(4): 0.5; Y(5): 99.5; Y(9): 0.0	1	7319		1	7904000	Light	Excluded by Method	Not	4.54789	3774000	658600	2.42			0	17	2	798.325	1595.64	1.14	75.76	18865	18865	CAL27_CURCUMIN_pTy_R1.raw
1	TIIDNTDLGYEVLPINTQYEGMRDCINtIR	T28;	Replicate 1	Unambiguous	SLC25A46	NP_620128.1	91137	solute carrier family 25 member 46	1	1	20270311	C25(Carbamidomethyl); T28(Phospho); R30(Label:13C(6))	1	T(1): 0.0; T(6): 0.0; Y(10): 0.0; T(17): 0.2; Y(19): 0.2; T(28): 99.6	1				2215000000		Inconsistently Labeled	Not				3.84			1	39	4	904.181	3613.7	0.06	108.05	27509	27509	CAL27_CURCUMIN_pTy_R1.raw
1	TKPIVKPQTSPEyGQGINPISR	Y13;	Replicate 1	Unambiguous	STAU1	NP_059348.2	6780	double-stranded RNA-binding protein Staufen homolog 1 isoform a	3	1	82659089	Y13(Phospho)	1	T(1): 0.0; T(9): 0.0; S(10): 0.0; Y(13): 100.0; S(21): 0.0	1	3859	1		7995000	Light	Excluded by Method	Not	100	2230000	5315	3.27			0	53	3	830.764	2490.28	0.68	54.33	13137	13137	CAL27_CURCUMIN_pTy_R1.raw
1	TLEPVKPPTVPNDyMTSPAR	Y14;	Replicate 1	Unambiguous	ABI1	NP_001171596.1	10006	abl interactor 1 isoform l	12	1	296011003	Y14(Phospho)	1	T(1): 0.0; T(9): 0.0; Y(14): 100.0; T(16): 0.0; S(17): 0.0	1	6495			9804000	Light	Redundant	Not	2.891	8377000	2300000	3.33			0	18	3	765.036	2293.09	-0.09	70.19	17374	17374	CAL27_CURCUMIN_pTy_R1.raw
1	TLEPVKPPTVPNDyMTSPAR	Y14;	Replicate 1	Unambiguous	ABI1	NP_001171596.1	10006	abl interactor 1 isoform l	12	1	296011003	Y14(Phospho)	1	T(1): 0.0; T(9): 0.0; Y(14): 97.6; T(16): 1.2; S(17): 1.2	1	6411			18240000	Light	Unique	Used	2.462	17750000	5722000	2.37			0	69	3	765.037	2293.09	0.62	69.68	17238	17238	CAL27_CURCUMIN_pTy_R1.raw
1	TLEPVKPPTVPNDyMTSPAR	Y14;	Replicate 1	Unambiguous	ABI1	NP_001171596.1	10006	abl interactor 1 isoform l	12	1	296011003	K6(Label:13C(6)); Y14(Phospho); R20(Label:13C(6))	1	T(1): 0.0; T(9): 0.0; Y(14): 99.1; T(16): 0.8; S(17): 0.0	1	6495			2300000	Heavy	Unique	Used	2.891	8377000	2300000	3.42			0	20	3	769.051	2305.14	1.51	70.27	17395	17395	CAL27_CURCUMIN_pTy_R1.raw
1	TYVDPHTyEDPNQAVLK	Y8;	Replicate 1	Unambiguous	EPHA2	NP_004422.2	1969	ephrin type-A receptor 2 precursor	1	1	32967311	Y8(Phospho); K17(Label:13C(6))	1	T(1): 0.0; Y(2): 0.0; T(7): 0.8; Y(8): 99.2	1	3888			28540000	Heavy	Unique	Used	1.205	43340000	28540000	3.83			0	66	3	692.651	2075.94	-0.89	54.67	13227	13227	CAL27_CURCUMIN_pTy_R1.raw
1	TLyDFPGNDAEDLPFK	Y3;	Replicate 1	Unambiguous	CRKL	NP_005198.1	1399	crk-like protein	1	1	4885153	Y3(Phospho); K16(Label:13C(6))	1	T(1): 0.0; Y(3): 100.0	1	10980			13300000	Heavy	Redundant	Not	1.446	24240000	13300000	3.26			0	38	2	964.424	1927.84	-2.28	98.8	25026	25026	CAL27_CURCUMIN_pTy_R1.raw
1	TLyDFPGNDAEDLPFK	Y3;	Replicate 1	Unambiguous	CRKL	NP_005198.1	1399	crk-like protein	1	1	4885153	Y3(Phospho)	1	T(1): 0.0; Y(3): 100.0	1	10980			24240000	Light	Unique	Used	1.446	24240000	13300000	4.09			0	17	2	961.415	1921.82	-1.79	98.93	25061	25061	CAL27_CURCUMIN_pTy_R1.raw
1	TQyNQVPSEDFER	Y3;	Replicate 1	Unambiguous	CXADR	NP_001193995.1	1525	coxsackievirus and adenovirus receptor isoform 5 precursor	2	1	333470709	Y3(Phospho)	1	T(1): 0.0; Y(3): 100.0; S(8): 0.0	1	3340		1	12890000	Light	Excluded by Method	Not	8.89016	5034000	449400	3.29			0	29	2	846.849	1692.69	0.83	51.12	12276	12276	CAL27_CURCUMIN_pTy_R1.raw
1	TPyEAYDPIGK	Y3;	Replicate 1	Unambiguous	KIRREL	NP_001273278.1	55243	kin of IRRE-like protein 1 isoform 2 precursor	2	1	556503362	Y3(Phospho)	1	T(1): 0.0; Y(3): 100.0; Y(6): 0.0	1	4141			13180000	Light	Unique	Used	1.596	13180000	6553000	2.33			0	69	2	667.29	1333.57	0.83	56.07	13600	13600	CAL27_CURCUMIN_pTy_R1.raw
1	TVMYTAVGSEWRPFGyPR	Y16;	Replicate 1	Unambiguous	BCS1L	NP_001244272.1	617	mitochondrial chaperone BCS1	1	1	383087732	Y16(Phospho)	1	T(1): 0.0; Y(4): 0.0; T(5): 0.0; S(9): 0.0; Y(16): 100.0	1	10761			41930000	Light	Unique	Used	1.776	41930000	18740000	3.79			0	34	3	733.004	2197	1.4	97.43	24656	24656	CAL27_CURCUMIN_pTy_R1.raw
1	TVMYTAVGSEWRPFGyPR	Y16;	Replicate 1	Unambiguous	BCS1L	NP_001244272.1	617	mitochondrial chaperone BCS1	1	1	383087732	R12(Label:13C(6)); Y16(Phospho); R18(Label:13C(6))	1	T(1): 0.0; Y(4): 0.0; T(5): 0.0; S(9): 1.2; Y(16): 98.8	1	10761			18740000	Heavy	Redundant	Not	1.776	41930000	18740000	2.32			0	69	3	737.017	2209.04	1.24	97.45	24661	24661	CAL27_CURCUMIN_pTy_R1.raw
1	TPLYLQPDAyGSLDR	Y10;	Replicate 1	Unambiguous	PPP1R13L	NP_001135974.1	10848	relA-associated inhibitor	1	1	215820635	Y10(Phospho)	1	T(1): 0.0; Y(4): 0.0; Y(10): 99.4; S(12): 0.6	1	7370	1		3277000	Light	Excluded by Method	Not	100	1256000	5315	2.91			0	32	2	894.916	1788.82	1.85	75.58	18816	18816	CAL27_CURCUMIN_pTy_R1.raw
1	TGHGYVyEYPSR	Y7;	Replicate 1	Unambiguous	NEDD9	NP_001257962.1	4739	enhancer of filamentation 1 isoform 4	3	1	402691666	Y7(Phospho)	1	T(1): 0.0; Y(5): 0.0; Y(7): 99.4; Y(9): 0.6; S(11): 0.0	1	1984		1	1110000	Light	Excluded by Method	Not	0.509502	611800	953000	1.87			0	70	2	754.813	1508.62	-0.86	42.43	9938	9938	CAL27_CURCUMIN_pTy_R1.raw
1	TPQGPPEIySDTQFPSLQSTAK	Y9;	Replicate 1	Unambiguous	CDV3	NP_001269691.1	55573	protein CDV3 homolog isoform d	6	1	544346257	Y9(Phospho)	1	T(1): 0.0; Y(9): 100.0; S(10): 0.0; T(12): 0.0; S(16): 0.0; S(19): 0.0; T(20): 0.0	1	8158	1		7224000	Light	Excluded by Method	Not	100	1773000	5315	2.92			0	6	3	824.717	2472.14	1.1	80.86	20227	20227	CAL27_CURCUMIN_pTy_R1.raw
1	TyAICGAIR	Y2;	Replicate 1	Unambiguous	RPS21	NP_001015.1	6227	40S ribosomal protein S21	1	1	4506699	Y2(Phospho); C5(Carbamidomethyl)	1	T(1): 0.5; Y(2): 99.5	1	3211		1	10560000	Light	Excluded by Method	Not	7.03903	6651000	749900	2.4			0	54	2	552.749	1104.49	0.42	50.35	12070	12070	CAL27_CURCUMIN_pTy_R1.raw
2	TyVDPHTyEDPNQAVLK	Y2; Y8;	Replicate 1	Unambiguous	EPHA2	NP_004422.2	1969	ephrin type-A receptor 2 precursor	1	1	32967311	Y2(Phospho); Y8(Phospho)	1	T(1): 0.7; Y(2): 99.3; T(7): 0.0; Y(8): 100.0	1	3549			19980000	Light	Unique	Used	0.545	19980000	29100000	4.55			0	2	3	717.302	2149.89	1.62	52.56	12663	12663	CAL27_CURCUMIN_pTy_R1.raw
1	TyVDPHTYEDPNQAVLK	Y2;	Replicate 1	Unambiguous	EPHA2	NP_004422.2	1969	ephrin type-A receptor 2 precursor	1	1	32967311	Y2(Phospho)	1	T(1): 0.8; Y(2): 99.2; T(7): 0.0; Y(8): 0.0	1	4433			10840000	Light	Unique	Used	0.824	10840000	10440000	3.82			0	34	3	690.648	2069.93	3.7	57.81	14063	14063	CAL27_CURCUMIN_pTy_R1.raw
2	TyVDPHTyEDPNQAVLK	Y2; Y8;	Replicate 1	Unambiguous	EPHA2	NP_004422.2	1969	ephrin type-A receptor 2 precursor	1	1	32967311	Y2(Phospho); Y8(Phospho); K17(Label:13C(6))	1	T(1): 0.8; Y(2): 99.2; T(7): 0.8; Y(8): 99.2	1	3549			29380000	Heavy	Redundant	Not	0.545	19980000	29100000	4.46			0	20	3	719.308	2155.91	0.69	52.46	12634	12634	CAL27_CURCUMIN_pTy_R1.raw
1	EILVGDVGQTVDDPyATFVK	Y15;	Replicate 1	Unambiguous	CFL1	NP_005498.1	1072	cofilin-1	1	1	5031635	Y15(Phospho)	1	T(10): 0.0; Y(15): 100.0; T(17): 0.0	1	10422			706400000	Light	Unique	Used	3.701	673600000	144400000	5.23			0	19	2	1123.54	2246.07	2.66	95.35	24097	24097	CAL27_CURCUMIN_pTy_R1.raw
1	EILVGDVGQTVDDPyATFVK	Y15;	Replicate 1	Unambiguous	CFL1	NP_005498.1	1072	cofilin-1	1	1	5031635	Y15(Phospho); K20(Label:13C(6))	1	T(10): 0.0; Y(15): 100.0; T(17): 0.0	1	10432			56690000	Heavy	Redundant	Not	3.693	263900000	56690000	3.64			0	12	3	751.367	2252.09	1.19	95.64	24175	24175	CAL27_CURCUMIN_pTy_R1.raw
1	EILVGDVGQTVDDPyATFVK	Y15;	Replicate 1	Unambiguous	CFL1	NP_005498.1	1072	cofilin-1	1	1	5031635	Y15(Phospho)	1	T(10): 0.0; Y(15): 100.0; T(17): 0.0	1	10422			706400000	Light	Redundant	Not	3.701	673600000	144400000	4.92			0	4	2	1123.54	2246.07	1.57	95.97	24266	24266	CAL27_CURCUMIN_pTy_R1.raw
1	EILVGDVGQTVDDPyATFVK	Y15;	Replicate 1	Unambiguous	CFL1	NP_005498.1	1072	cofilin-1	1	1	5031635	Y15(Phospho)	1	T(10): 0.0; Y(15): 100.0; T(17): 0.0	1	10432			263900000	Light	Unique	Used	3.693	263900000	56690000	4.48			0	3	3	749.36	2246.06	0.45	95.98	24267	24267	CAL27_CURCUMIN_pTy_R1.raw
1	EILVGDVGQTVDDPyATFVK	Y15;	Replicate 1	Unambiguous	CFL1	NP_005498.1	1072	cofilin-1	1	1	5031635	Y15(Phospho)	1	T(10): 0.0; Y(15): 99.3; T(17): 0.7	1	10432			263900000	Light	Redundant	Not	3.693	263900000	56690000	4.09			0	15	3	749.36	2246.07	1.02	95.36	24101	24101	CAL27_CURCUMIN_pTy_R1.raw
1	VAEQEMQLEPITDERVyESIGQYGGETVK	Y17;	Replicate 1	Unambiguous	MPP5	NP_001243479.1	64398	MAGUK p55 subfamily member 5 isoform 2	2	1	375065852	Y17(Phospho)	1	T(12): 0.0; Y(17): 99.0; S(19): 1.0; Y(23): 0.0; T(27): 0.0	1	10165	1		10520000	Light	Excluded by Method	Not	100	3084000	5315	4.51			1	61	3	1126.85	3378.54	-0.2	93.75	23667	23667	CAL27_CURCUMIN_pTy_R1.raw
1	DVPDGPLLREEtYDVPPAFAK	T12;	Replicate 1	Unambiguous	BCAR1	NP_001164190.1	9564	breast cancer anti-estrogen resistance protein 1 isoform 7	9	1	282398123	R9(Label:13C(6)); T12(Phospho); K21(Label:13C(6))	1	T(12): 100.0; Y(13): 0.0	1	10147			24420000	Heavy	Unique	Used	1.175	36180000	24420000	3.63			1	22	3	807.728	2421.17	-3.1	93.64	23640	23640	CAL27_CURCUMIN_pTy_R1.raw
1	DVPDGPLLREEtYDVPPAFAK	T12;	Replicate 1	Unambiguous	BCAR1	NP_001164190.1	9564	breast cancer anti-estrogen resistance protein 1 isoform 7	9	1	282398123	T12(Phospho)	1	T(12): 99.1; Y(13): 0.9	1	10147			36990000	Light	Redundant	Not	1.175	36180000	24420000	3.51			1	21	3	803.718	2409.14	0.75	93.78	23676	23676	CAL27_CURCUMIN_pTy_R1.raw
1	RPLEQQQPHHIPTSAPVyQQPQQQPVAQSYGGYK	Y18;	Replicate 1	Unambiguous	LASP1	NP_001258537.1	3927	LIM and SH3 domain protein 1 isoform b	2	1	410444379	Y18(Phospho)	1	T(13): 0.0; S(14): 0.0; Y(18): 100.0; S(29): 0.0; Y(30): 0.0; Y(33): 0.0	1	4311			11120000	Light	Unique	Used	4.17	3383000	643800	6.87			0	10	4	992.235	3965.92	2.7	57	13851	13851	CAL27_CURCUMIN_pTy_R1.raw
1	LFRPVAADGQLHtLGDLLK	T13;	Replicate 1	Unambiguous	ATG5	NP_001273036.1	9474	autophagy protein 5 isoform b precursor	2	1	554790347	R3(Label:13C(6)); T13(Phospho)	1	T(13): 100.0	1				3670000		Inconsistently Labeled	Not				2.41			0	57	3	717.387	2150.15	0.13	106.82	27179	27179	CAL27_CURCUMIN_pTy_R1.raw
1	NIILEEGKEILVGDVGQTVDDPyATFVK	Y23;	Replicate 1	Unambiguous	CFL1	NP_005498.1	1072	cofilin-1	1	1	5031635	Y23(Phospho)	1	T(18): 0.0; Y(23): 100.0; T(25): 0.0	1	14103			148600000	Light	Unique	Used	4.026	141200000	27820000	8.01			1	3	3	1048.19	3142.56	0.92	117.81	30128	30128	CAL27_CURCUMIN_pTy_R1.raw
1	QTSAyNISNSSTFTK	Y5;	Replicate 1	Unambiguous	PLXNA1	NP_115618.3	5361	plexin-A1 precursor	1	1	262118282	Y5(Phospho)	1	T(2): 0.0; S(3): 0.5; Y(5): 99.5; S(8): 0.0; S(10): 0.0; S(11): 0.0; T(12): 0.0; T(14): 0.0	1	2904	1		3431000	Light	Excluded by Method	Not	100	1717000	5315	3.11			0	34	2	864.879	1728.75	1.73	48.33	11528	11528	CAL27_CURCUMIN_pTy_R1.raw
1	ATGNQPPPLVGTYNTLLsR	S18;	Replicate 1	Unambiguous	DCBLD2	NP_563615.3	131566	discoidin, CUB and LCCL domain-containing protein 2 precursor	1	1	54792129	T12(Phospho)	1	T(2): 0.0; T(12): 0.6; Y(13): 0.6; T(15): 0.6; S(18): 98.1	1	8486			3381000	Light	Unique	Used	3.88	2732000	558600	2.38			0	0	2	1040.02	2079.03	0.48	83.01	20792	20792	CAL27_CURCUMIN_pTy_R1.raw
1	ATGNQPPPLVGTYNTLLsR	S18;	Replicate 1	Unambiguous	DCBLD2	NP_563615.3	131566	discoidin, CUB and LCCL domain-containing protein 2 precursor	1	1	54792129	T12(Phospho)	1	T(2): 0.0; T(12): 0.7; Y(13): 0.7; T(15): 0.7; S(18): 97.9	1	8419			10290000	Light	Unique	Used	4.418	9634000	1731000	2.58			0	0	2	1040.02	2079.03	0.25	82.49	20658	20658	CAL27_CURCUMIN_pTy_R1.raw
1	ATGNQPPPLVGTyNTLLSR	Y13;	Replicate 1	Unambiguous	DCBLD2	NP_563615.3	131566	discoidin, CUB and LCCL domain-containing protein 2 precursor	1	1	54792129	Y13(Phospho)	1	T(2): 0.0; T(12): 0.7; Y(13): 99.3; T(15): 0.0; S(18): 0.0	1	8461			5917000	Light	Unique	Used	5.572	5216000	742900	4.09			0	11	3	693.682	2079.03	1.47	82.78	20735	20735	CAL27_CURCUMIN_pTy_R1.raw
1	MTTTSAAAyGTHLSPHVPHR	Y9;	Replicate 1	Unambiguous	ITGB4	NP_001005731.1	3691	integrin beta-4 isoform 3 precursor	3	1	54607033	Y9(Phospho); R20(Label:13C(6))	1	T(2): 0.0; T(3): 0.0; T(4): 0.0; S(5): 0.0; Y(9): 100.0; T(11): 0.0; S(14): 0.0	1	3265			14520000	Heavy	Unique	Used	2.412	44140000	14520000	3.84			0	13	3	741.016	2221.03	1.39	51	12245	12245	CAL27_CURCUMIN_pTy_R1.raw
1	MTTTSAAAyGTHLSPHVPHR	Y9;	Replicate 1	Unambiguous	ITGB4	NP_001005731.1	3691	integrin beta-4 isoform 3 precursor	3	1	54607033	Y9(Phospho); R20(Label:13C(6))	1	T(2): 0.0; T(3): 0.0; T(4): 0.0; S(5): 0.0; Y(9): 97.8; T(11): 1.1; S(14): 1.1	1	3250			35450000	Heavy	Unique	Used	2.292	102400000	35450000	5.76			0	36	4	556.013	2221.03	-0.65	50.81	12194	12194	CAL27_CURCUMIN_pTy_R1.raw
1	MTTTSAAAyGTHLSPHVPHR	Y9;	Replicate 1	Unambiguous	ITGB4	NP_001005731.1	3691	integrin beta-4 isoform 3 precursor	3	1	54607033	Y9(Phospho); T11(Phospho); R20(Label:13C(6))	1	T(2): 0.0; T(3): 0.0; T(4): 0.0; S(5): 0.0; Y(9): 99.0; T(11): 50.5; S(14): 50.5	1	3490			6852000	Heavy	Redundant	Not	0.99	8551000	6852000	2.66			0	55	3	767.673	2301	2.55	52.12	12546	12546	CAL27_CURCUMIN_pTy_R1.raw
1	MTTTSAAAyGTHLSPHVPHR	Y9;	Replicate 1	Unambiguous	ITGB4	NP_001005731.1	3691	integrin beta-4 isoform 3 precursor	3	1	54607033	Y9(Phospho)	1	T(2): 0.0; T(3): 0.0; T(4): 0.0; S(5): 0.0; Y(9): 99.1; T(11): 0.9; S(14): 0.0	1	3250			107800000	Light	Redundant	Not	2.292	102400000	35450000	4.29			0	48	4	554.508	2215.01	-1.15	50.56	12128	12128	CAL27_CURCUMIN_pTy_R1.raw
1	MTTTSAAAyGTHLSPHVPHR	Y9;	Replicate 1	Unambiguous	ITGB4	NP_001005731.1	3691	integrin beta-4 isoform 3 precursor	3	1	54607033	Y9(Phospho)	1	T(2): 0.0; T(3): 0.0; T(4): 0.0; S(5): 0.0; Y(9): 99.2; T(11): 0.8; S(14): 0.0	1	3250			107800000	Light	Redundant	Not	2.292	102400000	35450000	5.07			0	17	4	554.508	2215.01	-0.27	51.2	12297	12297	CAL27_CURCUMIN_pTy_R1.raw
2	MTTTSAAAyGTHLsPHVPHR	Y9; S14;	Replicate 1	Unambiguous	ITGB4	NP_001005731.1	3691	integrin beta-4 isoform 3 precursor	3	1	54607033	Y9(Phospho); T11(Phospho)	1	T(2): 0.0; T(3): 0.0; T(4): 0.0; S(5): 1.4; Y(9): 97.3; T(11): 2.7; S(14): 98.6	1	3490			8551000	Light	Unique	Used	0.99	8551000	6852000	3.2			0	27	3	765.665	2294.98	1.68	52.17	12558	12558	CAL27_CURCUMIN_pTy_R1.raw
1	HTDDEMTGyVATR	Y9;	Replicate 1	Unambiguous	MAPK14	NP_620582.1	1432	mitogen-activated protein kinase 14 isoform 3	4	1	20986514	Y9(Phospho)	1	T(2): 0.0; T(7): 0.0; Y(9): 100.0; T(12): 0.0	1	966			284100000	Light	Redundant	Not	1.686	284100000	133700000	3.95			0	7	3	525.876	1575.61	0.05	35.11	7964	7964	CAL27_CURCUMIN_pTy_R1.raw
1	HTDDEMTGyVATR	Y9;	Replicate 1	Unambiguous	MAPK14	NP_620582.1	1432	mitogen-activated protein kinase 14 isoform 3	4	1	20986514	Y9(Phospho)	1	T(2): 0.0; T(7): 0.0; Y(9): 100.0; T(12): 0.0	1	968			614700000	Light	Redundant	Not	1.671	614700000	291900000	4.39			0	0	2	788.311	1575.62	0.68	35.2	7987	7987	CAL27_CURCUMIN_pTy_R1.raw
1	HTDDEMTGyVATR	Y9;	Replicate 1	Unambiguous	MAPK14	NP_620582.1	1432	mitogen-activated protein kinase 14 isoform 3	4	1	20986514	Y9(Phospho); R13(Label:13C(6))	1	T(2): 0.0; T(7): 0.0; Y(9): 100.0; T(12): 0.0	1	966			134200000	Heavy	Redundant	Not	1.686	284100000	133700000	3.62			0	38	3	527.883	1581.63	-0.75	35.21	7988	7988	CAL27_CURCUMIN_pTy_R1.raw
1	HTDDEMTGyVATR	Y9;	Replicate 1	Unambiguous	MAPK14	NP_620582.1	1432	mitogen-activated protein kinase 14 isoform 3	4	1	20986514	M6(Oxidation); Y9(Phospho)	1	T(2): 0.0; T(7): 0.0; Y(9): 100.0; T(12): 0.0	1	984			5453000	Light	Unique	Used	1.583	5453000	2734000	3.56			0	57	3	531.208	1591.61	0.45	35.31	8015	8015	CAL27_CURCUMIN_pTy_R1.raw
1	HTDDEMTGyVATR	Y9;	Replicate 1	Unambiguous	MAPK14	NP_620582.1	1432	mitogen-activated protein kinase 14 isoform 3	4	1	20986514	M6(Oxidation); Y9(Phospho); R13(Label:13C(6))	1	T(2): 0.0; T(7): 0.0; Y(9): 100.0; T(12): 0.0	1	984			3105000	Heavy	Redundant	Not	1.583	5453000	2734000	3.34			0	35	3	533.215	1597.63	0.57	35.38	8033	8033	CAL27_CURCUMIN_pTy_R1.raw
1	HTDDEMTGyVATR	Y9;	Replicate 1	Unambiguous	MAPK14	NP_620582.1	1432	mitogen-activated protein kinase 14 isoform 3	4	1	20986514	Y9(Phospho); R13(Label:13C(6))	1	T(2): 0.0; T(7): 0.0; Y(9): 100.0; T(12): 0.0	1	968			293000000	Heavy	Redundant	Not	1.671	614700000	291900000	4.72			0	3	2	791.323	1581.64	2	35.66	8110	8110	CAL27_CURCUMIN_pTy_R1.raw
1	HTDDEMTGyVATR	Y9;	Replicate 1	Unambiguous	MAPK14	NP_620582.1	1432	mitogen-activated protein kinase 14 isoform 3	4	1	20986514	Y9(Phospho)	1	T(2): 0.0; T(7): 0.0; Y(9): 100.0; T(12): 0.0	1	966			284100000	Light	Unique	Used	1.686	284100000	133700000	4.71			0	2	3	525.878	1575.62	2.49	35.67	8111	8111	CAL27_CURCUMIN_pTy_R1.raw
1	HTDDEMTGyVATR	Y9;	Replicate 1	Unambiguous	MAPK14	NP_620582.1	1432	mitogen-activated protein kinase 14 isoform 3	4	1	20986514	Y9(Phospho); R13(Label:13C(6))	1	T(2): 0.0; T(7): 0.0; Y(9): 100.0; T(12): 0.0	1	966			134200000	Heavy	Redundant	Not	1.686	284100000	133700000	4.27			0	18	3	527.883	1581.63	-0.29	35.88	8170	8170	CAL27_CURCUMIN_pTy_R1.raw
1	HTDDEMTGyVATR	Y9;	Replicate 1	Unambiguous	MAPK14	NP_620582.1	1432	mitogen-activated protein kinase 14 isoform 3	4	1	20986514	M6(Oxidation); Y9(Phospho)	1	T(2): 0.0; T(7): 0.4; Y(9): 99.6; T(12): 0.0	1	1016			27650000	Light	Redundant	Not	1.701	26840000	12520000	2.81			0	1	2	796.309	1591.61	0.96	35.6	8094	8094	CAL27_CURCUMIN_pTy_R1.raw
1	HTDDEMTGyVATR	Y9;	Replicate 1	Unambiguous	MAPK14	NP_620582.1	1432	mitogen-activated protein kinase 14 isoform 3	4	1	20986514	Y9(Phospho)	1	T(2): 0.0; T(7): 0.4; Y(9): 99.6; T(12): 0.0	1	968			614700000	Light	Redundant	Not	1.671	614700000	291900000	4.54			0	1	2	788.312	1575.62	1.54	35.77	8139	8139	CAL27_CURCUMIN_pTy_R1.raw
2	HTDDEMtGyVATR	T7; Y9;	Replicate 1	Unambiguous	MAPK14	NP_620582.1	1432	mitogen-activated protein kinase 14 isoform 3	4	1	20986514	T7(Phospho); T12(Phospho)	1	T(2): 0.0; T(7): 100.0; Y(9): 100.0; T(12): 0.0	1	926			145100000	Light	Redundant	Not	0.827	145100000	139100000	1.96			0	10	2	828.295	1655.58	1.45	34.79	7876	7876	CAL27_CURCUMIN_pTy_R1.raw
2	HTDDEMtGyVATR	T7; Y9;	Replicate 1	Unambiguous	MAPK14	NP_620582.1	1432	mitogen-activated protein kinase 14 isoform 3	4	1	20986514	T7(Phospho); T12(Phospho)	1	T(2): 0.0; T(7): 100.0; Y(9): 100.0; T(12): 0.0	1	969			36760000	Light	Redundant	Not	0.82	36420000	35230000	2.5			0	55	3	552.532	1655.58	0.96	35.16	7975	7975	CAL27_CURCUMIN_pTy_R1.raw
2	HTDDEMtGyVATR	T7; Y9;	Replicate 1	Unambiguous	MAPK14	NP_620582.1	1432	mitogen-activated protein kinase 14 isoform 3	4	1	20986514	T7(Phospho); T12(Phospho); R13(Label:13C(6))	1	T(2): 0.0; T(7): 100.0; Y(9): 100.0; T(12): 0.0	1	969			35230000	Heavy	Redundant	Not	0.82	36420000	35230000	3.02			0	46	3	554.538	1661.6	-1.13	35.19	7982	7982	CAL27_CURCUMIN_pTy_R1.raw
2	HTDDEMtGyVATR	T7; Y9;	Replicate 1	Unambiguous	MAPK14	NP_620582.1	1432	mitogen-activated protein kinase 14 isoform 3	4	1	20986514	T7(Phospho); T12(Phospho)	1	T(2): 0.0; T(7): 100.0; Y(9): 100.0; T(12): 0.0	1	926			145100000	Light	Redundant	Not	0.827	145100000	139100000	4.23			0	0	2	828.295	1655.58	1.45	35.31	8014	8014	CAL27_CURCUMIN_pTy_R1.raw
2	HTDDEMtGyVATR	T7; Y9;	Replicate 1	Unambiguous	MAPK14	NP_620582.1	1432	mitogen-activated protein kinase 14 isoform 3	4	1	20986514	T7(Phospho); T12(Phospho); R13(Label:13C(6))	1	T(2): 0.0; T(7): 100.0; Y(9): 100.0; T(12): 0.0	1	926			139300000	Heavy	Redundant	Not	0.827	145100000	139100000	4.4			0	4	2	831.305	1661.6	1.38	35.37	8032	8032	CAL27_CURCUMIN_pTy_R1.raw
2	HTDDEMtGyVATR	T7; Y9;	Replicate 1	Unambiguous	MAPK14	NP_620582.1	1432	mitogen-activated protein kinase 14 isoform 3	4	1	20986514	T7(Phospho); T12(Phospho)	1	T(2): 0.0; T(7): 100.0; Y(9): 100.0; T(12): 0.0	1	969			36760000	Light	Unique	Used	0.82	36420000	35230000	3.77			0	23	3	552.532	1655.58	0.74	35.78	8141	8141	CAL27_CURCUMIN_pTy_R1.raw
2	HTDDEMtGyVATR	T7; Y9;	Replicate 1	Unambiguous	MAPK14	NP_620582.1	1432	mitogen-activated protein kinase 14 isoform 3	4	1	20986514	T7(Phospho); T12(Phospho); R13(Label:13C(6))	1	T(2): 0.0; T(7): 100.0; Y(9): 100.0; T(12): 0.0	1	969			35230000	Heavy	Redundant	Not	0.82	36420000	35230000	2.92			0	14	3	554.539	1661.6	-0.03	35.82	8152	8152	CAL27_CURCUMIN_pTy_R1.raw
2	HTDDEMtGyVATR	T7; Y9;	Replicate 1	Unambiguous	MAPK14	NP_620582.1	1432	mitogen-activated protein kinase 14 isoform 3	4	1	20986514	T7(Phospho); T12(Phospho)	1	T(2): 0.0; T(7): 100.0; Y(9): 100.0; T(12): 0.0	1	926			145100000	Light	Redundant	Not	0.827	145100000	139100000	4.31			0	0	2	828.295	1655.58	1.15	35.84	8158	8158	CAL27_CURCUMIN_pTy_R1.raw
2	HTDDEMtGyVATR	T7; Y9;	Replicate 1	Unambiguous	MAPK14	NP_620582.1	1432	mitogen-activated protein kinase 14 isoform 3	4	1	20986514	T7(Phospho); T12(Phospho); R13(Label:13C(6))	1	T(2): 0.0; T(7): 100.0; Y(9): 100.0; T(12): 0.0	1	926			139300000	Heavy	Redundant	Not	0.827	145100000	139100000	3.76			0	4	2	831.305	1661.6	0.86	35.9	8176	8176	CAL27_CURCUMIN_pTy_R1.raw
1	KTPQGPPEIySDTQFPSLQSTAK	Y10;	Replicate 1	Unambiguous	CDV3	NP_001269691.1	55573	protein CDV3 homolog isoform d	6	1	544346257	Y10(Phospho)	1	T(2): 0.0; Y(10): 100.0; S(11): 0.0; T(13): 0.0; S(17): 0.0; S(20): 0.0; T(21): 0.0	1	7425			78420000	Light	Unique	Used	5.032	76760000	12100000	7.4			1	0	3	867.415	2600.23	0.53	76.49	19059	19059	CAL27_CURCUMIN_pTy_R1.raw
1	KTyDLLFK	Y3;	Replicate 1	Unambiguous	RAB10	NP_057215.3	10890	ras-related protein Rab-10	1	1	256222019	Y3(Phospho)	1	T(2): 0.0; Y(3): 100.0	1	5809			12600000	Light	Unique	Used	8.625	11710000	1077000	3.12			1	21	2	554.278	1107.55	-0.65	66.31	16334	16334	CAL27_CURCUMIN_pTy_R1.raw
1	DTCYSPKPSVyLSTPSSASK	Y11;	Replicate 1	Unambiguous	CD2AP	NP_036252.1	23607	CD2-associated protein	1	1	11321634	C3(Carbamidomethyl); Y11(Phospho)	1	T(2): 0.0; Y(4): 0.0; S(5): 0.0; S(9): 0.0; Y(11): 98.9; S(13): 1.1; T(14): 0.0; S(16): 0.0; S(17): 0.0; S(19): 0.0	1	4203	1		1880000	Light	Excluded by Method	Not	100	789500	5315	3.67			0	12	3	752.333	2254.98	-4.55	56.41	13691	13691	CAL27_CURCUMIN_pTy_R1.raw
1	NTPyKTLEPVKPPTVPNDYMTSPAR	Y4;	Replicate 1	Unambiguous	ABI1	NP_001171596.1	10006	abl interactor 1 isoform l	12	1	296011003	Y4(Phospho)	1	T(2): 0.0; Y(4): 100.0; T(6): 0.0; T(14): 0.0; Y(19): 0.0; T(21): 0.0; S(22): 0.0	1	6993	1		2707000	Light	Unique	Used	63.259	423700	5315	2.51			1	19	3	966.138	2896.4	1.16	73.32	18211	18211	CAL27_CURCUMIN_pTy_R1.raw
1	ITLDNAyMEK	Y7;	Replicate 1	Unambiguous	PKM||PKM	NP_872270.1||NP_002645.3	5315||5315	pyruvate kinase PKM isoform b||pyruvate kinase PKM isoform a	6	2	33286420;33286418	Y7(Phospho)	1	T(2): 0.0; Y(7): 100.0	1	3851			3290000	Light	Not Unique	Not	0.987	3290000	2645000	2.04			0	52	2	639.279	1277.55	1.63	54.25	13116	13116	CAL27_CURCUMIN_pTy_R1.raw
1	VTPPEGyEVVTVFPK	Y7;	Replicate 1	Unambiguous	PDLIM1	NP_066272.1	9124	PDZ and LIM domain protein 1	1	1	13994151	Y7(Phospho)	1	T(2): 0.0; Y(7): 100.0; T(11): 0.0	1	8878	1		4756000	Light	Excluded by Method	Not	100	2515000	5315	2.58			0	16	3	581.285	1741.84	-1.97	85.56	21470	21470	CAL27_CURCUMIN_pTy_R1.raw
1	VTPPEGyEVVTVFPK	Y7;	Replicate 1	Unambiguous	PDLIM1	NP_066272.1	9124	PDZ and LIM domain protein 1	1	1	13994151	Y7(Phospho)	1	T(2): 0.0; Y(7): 100.0; T(11): 0.0	1	8801			72060000	Light	Unique	Used	3.446	71620000	16490000	2.65			0	7	2	871.426	1741.84	-0.21	85.61	21483	21483	CAL27_CURCUMIN_pTy_R1.raw
1	WTAPEAALyGR	Y9;	Replicate 1	Unambiguous	YES1	NP_005424.1	7525	tyrosine-protein kinase Yes	5	1	4885661	Y9(Phospho)	1	T(2): 0.0; Y(9): 100.0	1	5711	1		1634000	Light	Excluded by Method	Not	100	1168000	5315	2.18			0	23	2	657.795	1314.58	-3.86	65.34	16074	16074	CAL27_CURCUMIN_pTy_R1.raw
1	NTyNQTALDIVNQFTTSQASR	Y3;	Replicate 1	Unambiguous	CASKIN2	NP_001136115.1	57513	caskin-2 isoform b	2	1	217416350	Y3(Phospho)	1	T(2): 0.5; Y(3): 99.5; T(6): 0.0; T(15): 0.0; T(16): 0.0; S(17): 0.0; S(20): 0.0	1	12691			21070000	Light	Unique	Used	0.891	21070000	18760000	6.12			0	0	2	1226.56	2452.12	1.48	109.15	27803	27803	CAL27_CURCUMIN_pTy_R1.raw
1	NTyNQTALDIVNQFTTSQASR	Y3;	Replicate 1	Unambiguous	CASKIN2	NP_001136115.1	57513	caskin-2 isoform b	2	1	217416350	Y3(Phospho); R21(Label:13C(6))	1	T(2): 0.5; Y(3): 99.5; T(6): 0.0; T(15): 0.0; T(16): 0.0; S(17): 0.0; S(20): 0.0	1	12691			25100000	Heavy	Redundant	Not	0.891	21070000	18760000	5.04			0	13	2	1229.57	2458.14	2.53	109.16	27807	27807	CAL27_CURCUMIN_pTy_R1.raw
1	NTyNQTALDIVNQFTTSQASR	Y3;	Replicate 1	Unambiguous	CASKIN2	NP_001136115.1	57513	caskin-2 isoform b	2	1	217416350	Y3(Phospho); R21(Label:13C(6))	1	T(2): 0.7; Y(3): 99.3; T(6): 0.0; T(15): 0.0; T(16): 0.0; S(17): 0.0; S(20): 0.0	1	12689			17870000	Heavy	Unique	Used	1.622	36520000	17870000	5.2			0	66	3	820.049	2458.13	-0.93	109.21	27820	27820	CAL27_CURCUMIN_pTy_R1.raw
1	NTyNQTALDIVNQFTTSQASR	Y3;	Replicate 1	Unambiguous	CASKIN2	NP_001136115.1	57513	caskin-2 isoform b	2	1	217416350	Y3(Phospho)	1	T(2): 1.0; Y(3): 99.0; T(6): 0.0; T(15): 0.0; T(16): 0.0; S(17): 0.0; S(20): 0.0	1	12689			37500000	Light	Redundant	Not	1.622	36520000	17870000	4.31			0	8	3	818.046	2452.12	4.29	109.14	27800	27800	CAL27_CURCUMIN_pTy_R1.raw
1	ETAIELGyLTAEQFDEWVKPK	Y8;	Replicate 1	Unambiguous	FH	NP_000134.2	2271	fumarate hydratase, mitochondrial	1	1	19743875	T10(Phospho); K19(Label:13C(6)); K21(Label:13C(6))	1	T(2): 1.0; Y(8): 97.9; T(10): 1.0	1	16124			2401000	Heavy	Redundant	Not	1.221	2654000	1725000	2.4			0	24	3	853.753	2559.24	-0.34	129.61	33296	33296	CAL27_CURCUMIN_pTy_R1.raw
1	AATSGVPSIYAPSTyAHLSPAK	Y15;	Replicate 1	Unambiguous	LSR	NP_001247419.1	51599	lipolysis-stimulated lipoprotein receptor isoform 5	5	1	386781463	Y15(Phospho)	1	T(3): 0.0; S(4): 0.0; S(8): 0.0; Y(10): 0.0; S(13): 0.0; T(14): 0.9; Y(15): 98.2; S(19): 0.9	1	6587			29470000	Light	Unique	Used	2.406	29090000	9595000	3.49			0	0	3	757.035	2269.09	0.35	70.81	17539	17539	CAL27_CURCUMIN_pTy_R1.raw
2	AATSGVPSIyAPStYAHLSPAK	Y10; T14;	Replicate 1	Unambiguous	LSR	NP_001247419.1	51599	lipolysis-stimulated lipoprotein receptor isoform 5	5	1	386781463	Y10(Phospho); Y15(Phospho)	1	T(3): 0.0; S(4): 0.0; S(8): 0.0; Y(10): 100.0; S(13): 1.2; T(14): 97.6; Y(15): 1.2; S(19): 0.0	1	6030			56480000	Light	Unique	Used	13	49460000	3019000	4.63			0	16	3	783.691	2349.06	0.51	67.22	16579	16579	CAL27_CURCUMIN_pTy_R1.raw
1	GPTSGPQSAPQIyGPPQYNIQYSSSAAVK	Y13;	Replicate 1	Unambiguous	ERBB2IP	NP_001006600.1	55914	protein LAP2 isoform 7	6	1	55770895	Y13(Phospho)	1	T(3): 0.0; S(4): 0.0; S(8): 0.0; Y(13): 100.0; Y(18): 0.0; Y(22): 0.0; S(23): 0.0; S(24): 0.0; S(25): 0.0	1	7126	1		2074000	Light	Unique	Used	64.937	434900	5315	4.16			0	26	3	1025.15	3073.43	0.49	74.05	18408	18408	CAL27_CURCUMIN_pTy_R1.raw
1	LVTSPCCIVTSTyGWTANMER	Y13;	Replicate 1	Unambiguous	HSP90AA1	NP_005339.3	3320	heat shock protein HSP 90-alpha isoform 2	2	1	154146191	C6(Carbamidomethyl); C7(Carbamidomethyl); Y13(Phospho)	1	T(3): 0.0; S(4): 0.0; T(10): 0.0; S(11): 0.0; T(12): 0.7; Y(13): 99.3; T(16): 0.0	1				24910000		No Quan Values	Not				4.61			0	9	3	842.7	2526.08	-0.72	100.36	25444	25444	CAL27_CURCUMIN_pTy_R1.raw
1	LVTSPCCIVTSTyGWTANMER	Y13;	Replicate 1	Unambiguous	HSP90AA1	NP_005339.3	3320	heat shock protein HSP 90-alpha isoform 2	2	1	154146191	C6(Carbamidomethyl); C7(Carbamidomethyl); Y13(Phospho)	1	T(3): 0.0; S(4): 0.0; T(10): 0.0; S(11): 0.0; T(12): 0.7; Y(13): 99.3; T(16): 0.0	1	11360			50640000	Light	Redundant	Not	18.43	50640000	2180000	3.6			0	0	2	1263.55	2526.09	0.03	100.4	25454	25454	CAL27_CURCUMIN_pTy_R1.raw
1	LVTSPCCIVTSTyGWTANMER	Y13;	Replicate 1	Unambiguous	HSP90AA1	NP_005339.3	3320	heat shock protein HSP 90-alpha isoform 2	2	1	154146191	C6(Carbamidomethyl); C7(Carbamidomethyl); Y13(Phospho)	1	T(3): 0.0; S(4): 0.0; T(10): 0.0; S(11): 0.0; T(12): 0.7; Y(13): 99.3; T(16): 0.0	1	11360			50640000	Light	Unique	Used	18.43	50640000	2180000	5.12			0	0	2	1263.55	2526.09	1.68	101.06	25630	25630	CAL27_CURCUMIN_pTy_R1.raw
1	NLTEQNSySNIPHEGK	Y8;	Replicate 1	Unambiguous	FAM120A	NP_001273652.1	23196	constitutive coactivator of PPAR-gamma-like protein 1 isoform c	5	1	557878628	Y8(Phospho)	1	T(3): 0.0; S(7): 0.8; Y(8): 98.5; S(9): 0.8	1	1712	1		10590000	Light	Excluded by Method	Not	100	4701000	5315	3.53			0	62	3	637.613	1910.83	-1.16	40.55	9435	9435	CAL27_CURCUMIN_pTy_R1.raw
1	EVTtVLQADSAEYAQPLVGGIVGTLHQR	T4;	Replicate 1	Unambiguous	DCBLD2	NP_563615.3	131566	discoidin, CUB and LCCL domain-containing protein 2 precursor	1	1	54792129	Y13(Phospho); R28(Label:13C(6))	1	T(3): 0.0; T(4): 97.7; S(10): 1.1; Y(13): 1.1; T(24): 0.0	1	13361		1	3057000	Heavy	Excluded by Method	Not	3.21147	12370000	3057000	4.79			0	68	3	1013.51	3038.53	-0.03	113.66	29016	29016	CAL27_CURCUMIN_pTy_R1.raw
1	GVTIPYRPKPSSSPVIFAGGQAYTIQGQyAIPQPDLTK	Y29;	Replicate 1	Unambiguous	PCBP2	NP_001122385.1	5094	poly(rC)-binding protein 2 isoform f	3	1	193083112	Y29(Phospho)	1	T(3): 0.0; Y(6): 0.0; S(11): 0.0; S(12): 0.0; S(13): 0.0; Y(23): 0.0; T(24): 0.0; Y(29): 100.0; T(37): 0.0	1	11132	1		112900000	Light	Excluded by Method	Not	100	11430000	5315	5.93			0	29	4	1032.28	4126.11	1.79	99.78	25289	25289	CAL27_CURCUMIN_pTy_R1.raw
1	VITNQyNNPAGLYSSENISNFNNALESK	Y6;	Replicate 1	Unambiguous	PDLIM1	NP_066272.1	9124	PDZ and LIM domain protein 1	1	1	13994151	Y6(Phospho)	1	T(3): 0.0; Y(6): 100.0; Y(13): 0.0; S(14): 0.0; S(15): 0.0; S(19): 0.0; S(27): 0.0	1	10630			68170000	Light	Unique	Used	6.591	63720000	7672000	6.76			0	0	3	1061.16	3181.45	1.19	96.59	24431	24431	CAL27_CURCUMIN_pTy_R1.raw
1	WDTGENPIyK	Y9;	Replicate 1	Unambiguous	ITGB1	NP_596867.1	3688	integrin beta-1 isoform 1A precursor	1	1	19743823	Y9(Phospho)	1	T(3): 0.0; Y(9): 100.0	1	4012			62240000	Light	Redundant	Not	5.241	60390000	9144000	2.43			0	42	2	651.774	1302.54	-0.31	55.33	13403	13403	CAL27_CURCUMIN_pTy_R1.raw
1	WDTGENPIyK	Y9;	Replicate 1	Unambiguous	ITGB1	NP_596867.1	3688	integrin beta-1 isoform 1A precursor	1	1	19743823	Y9(Phospho); K10(Label:13C(6))	1	T(3): 0.0; Y(9): 100.0	1	4012			9144000	Heavy	Redundant	Not	5.241	60390000	9144000	2.07			0	54	2	654.784	1308.56	-0.49	55.38	13414	13414	CAL27_CURCUMIN_pTy_R1.raw
1	WDTGENPIyK	Y9;	Replicate 1	Unambiguous	ITGB1	NP_596867.1	3688	integrin beta-1 isoform 1A precursor	1	1	19743823	Y9(Phospho)	1	T(3): 0.0; Y(9): 100.0	1	4012			62240000	Light	Unique	Used	5.241	60390000	9144000	2.57			0	6	2	651.774	1302.54	-0.03	55.92	13560	13560	CAL27_CURCUMIN_pTy_R1.raw
1	GVITDQNSDGyCQTGTMSR	Y11;	Replicate 1	Unambiguous	DSP	NP_001008844.1	1832	desmoplakin isoform II	2	1	58530842	Y11(Phospho); C12(Carbamidomethyl)	1	T(4): 0.0; S(8): 0.0; Y(11): 100.0; T(14): 0.0; T(16): 0.0; S(18): 0.0	1	1947			11170000	Light	Unique	Used	4.724	10010000	1681000	3.43			0	69	2	1085.43	2169.86	-0.02	42.22	9879	9879	CAL27_CURCUMIN_pTy_R1.raw
1	QQPTQFINPETPGyVGFANLPNQVHR	Y14;	Replicate 1	Unambiguous	42249	NP_004395.1	4735	septin-2 isoform a	3	1	4758158	Y14(Phospho)	1	T(4): 0.0; T(11): 0.9; Y(14): 99.1	1	10255		1	55310000	Light	Excluded by Method	Not	5.72241	9157000	1270000	6.85			0	38	3	1011.49	3032.44	0.47	94.28	23812	23812	CAL27_CURCUMIN_pTy_R1.raw
1	HGETFTFRDPHLLDPTVEyVK	Y19;	Replicate 1	Unambiguous	BCAR3	NP_001248338.1	8412	breast cancer anti-estrogen resistance protein 3 isoform 1	1	1	387157909	Y19(Phospho)	1	T(4): 0.0; T(6): 0.0; T(16): 1.0; Y(19): 99.0	1	9150			46940000	Light	Unique	Used	0.892	46940000	41770000	5.55			1	7	4	646.059	2581.21	0.26	87.34	21948	21948	CAL27_CURCUMIN_pTy_R1.raw
1	IQNTGDyYDLYGGEK	Y7;	Replicate 1	Unambiguous	PTPN11	NP_002825.3	5781	tyrosine-protein phosphatase non-receptor type 11 isoform 1	2	1	33356177	Y7(Phospho); K15(Label:13C(6))	1	T(4): 0.0; Y(7): 99.5; Y(8): 0.5; Y(11): 0.0	1	4751			53930000	Heavy	Unique	Used	0.951	64620000	53930000	3.68			0	0	2	911.387	1821.77	-0.72	60.2	14701	14701	CAL27_CURCUMIN_pTy_R1.raw
1	IQNTGDyYDLYGGEK	Y7;	Replicate 1	Unambiguous	PTPN11	NP_002825.3	5781	tyrosine-protein phosphatase non-receptor type 11 isoform 1	2	1	33356177	Y7(Phospho); K15(Label:13C(6))	1	T(4): 0.0; Y(7): 99.6; Y(8): 0.4; Y(11): 0.0	1	4751			53930000	Heavy	Redundant	Not	0.951	64620000	53930000	2.74			0	21	2	911.388	1821.77	0.49	59.65	14553	14553	CAL27_CURCUMIN_pTy_R1.raw
1	IQNTGDyYDLYGGEK	Y7;	Replicate 1	Unambiguous	PTPN11	NP_002825.3	5781	tyrosine-protein phosphatase non-receptor type 11 isoform 1	2	1	33356177	Y7(Phospho)	1	T(4): 0.0; Y(7): 99.6; Y(8): 0.4; Y(11): 0.0	1	4751			64620000	Light	Redundant	Not	0.951	64620000	53930000	3.27			0	0	2	908.378	1815.75	0.48	59.72	14573	14573	CAL27_CURCUMIN_pTy_R1.raw
1	KAPTNEFyA	Y8;	Replicate 1	Unambiguous	SDC4	NP_002990.2	6385	syndecan-4 precursor	1	1	38201675	K1(Label:13C(6)); Y8(Phospho)	1	T(4): 0.0; Y(8): 100.0	1	2086			68430000	Heavy	Redundant	Not	0.814	70200000	68430000	2.15			1	68	2	563.749	1126.49	-0.52	43	10093	10093	CAL27_CURCUMIN_pTy_R1.raw
1	KAPTNEFyA	Y8;	Replicate 1	Unambiguous	SDC4	NP_002990.2	6385	syndecan-4 precursor	1	1	38201675	Y8(Phospho)	1	T(4): 0.0; Y(8): 100.0	1	2086			70310000	Light	Redundant	Not	0.814	70200000	68430000	2.75			1	28	2	560.739	1120.47	0.23	43.44	10211	10211	CAL27_CURCUMIN_pTy_R1.raw
1	KAPTNEFyA	Y8;	Replicate 1	Unambiguous	SDC4	NP_002990.2	6385	syndecan-4 precursor	1	1	38201675	K1(Label:13C(6)); Y8(Phospho)	1	T(4): 0.0; Y(8): 100.0	1	2086			68430000	Heavy	Unique	Used	0.814	70200000	68430000	2.87			1	21	2	563.749	1126.49	-0.08	43.54	10237	10237	CAL27_CURCUMIN_pTy_R1.raw
1	AIETDKEyYTVK	Y8;	Replicate 1	Unambiguous	JAK1	NP_002218.2	3716	tyrosine-protein kinase JAK1	1	1	102469034	K6(Label:13C(6)); Y9(Phospho); K12(Label:13C(6))	1	T(4): 0.0; Y(8): 99.6; Y(9): 0.4; T(10): 0.0	1	1907			4713000	Heavy	Unique	Used	0.838	4980000	4713000	1.97			1	40	2	776.373	1551.74	0.68	42.01	9822	9822	CAL27_CURCUMIN_pTy_R1.raw
1	ERVTPPEGyEVVTVFPK	Y9;	Replicate 1	Unambiguous	PDLIM1	NP_066272.1	9124	PDZ and LIM domain protein 1	1	1	13994151	Y9(Phospho)	1	T(4): 0.0; Y(9): 100.0; T(13): 0.0	1	8204		1	12010000	Light	Excluded by Method	Not	9.11244	4355000	379300	3.44			1	18	3	676.334	2026.99	-0.51	81.14	20300	20300	CAL27_CURCUMIN_pTy_R1.raw
1	RPHtPTPGIYMGRPTYGSSR	T4;	Replicate 1	Unambiguous	TRA2B	NP_001230808.1	6434	transformer-2 protein homolog beta isoform 2	2	1	345197228	T4(Phospho)	1	T(4): 100.0; T(6): 0.0; Y(10): 0.0; T(15): 0.0; Y(16): 0.0; S(18): 0.0; S(19): 0.0	1	3540			10370000	Light	Unique	Used	1.496	10370000	5501000	4.68			0	25	4	578.526	2311.08	0.2	52.41	12622	12622	CAL27_CURCUMIN_pTy_R1.raw
1	RPHtPTPGIYMGRPTYGSSR	T4;	Replicate 1	Unambiguous	TRA2B	NP_001230808.1	6434	transformer-2 protein homolog beta isoform 2	2	1	345197228	R1(Label:13C(6)); T4(Phospho); R13(Label:13C(6)); R20(Label:13C(6))	1	T(4): 100.0; T(6): 0.0; Y(10): 0.0; T(15): 0.0; Y(16): 0.0; S(18): 0.0; S(19): 0.0	1	3585			9751000	Heavy	Unique	Used	1.77	21760000	9751000	3.91			0	46	4	583.04	2329.14	-1.51	52.68	12693	12693	CAL27_CURCUMIN_pTy_R1.raw
1	FFQTSAVPPGTSLSGRGPTPSLVLsK	S25;	Replicate 1	Unambiguous	MICALL2	NP_891554.1	79778	MICAL-like protein 2	1	1	33667117	S21(Phospho); S25(Phospho)	1	T(4): 48.6; S(5): 48.6; T(11): 0.0; S(12): 0.0; S(14): 0.0; T(19): 1.4; S(21): 1.4; S(25): 99.8	1	10878	1	1	260600000	Light	Excluded by Method	Not	38913.5	260600000	5315	2.39			1	17	3	931.124	2791.36	4.01	98.13	24845	24845	CAL27_CURCUMIN_pTy_R1.raw
1	IGEGTYGVVyK	Y10;	Replicate 1	Unambiguous	CDK1||CDK2	NP_001777.1||NP_001277159.1	983||1017	cyclin-dependent kinase 1 isoform 1||cyclin-dependent kinase 2 isoform 3	7	2	4502709;589811557	Y10(Phospho); K11(Label:13C(6))	1	T(5): 0.0; Y(6): 0.0; Y(10): 100.0	1	3364			25190000	Heavy	Redundant	Not	0.902	28620000	25190000	2.51			0	63	2	636.307	1271.61	3.44	51.32	12329	12329	CAL27_CURCUMIN_pTy_R1.raw
1	IGEGTYGVVyK	Y10;	Replicate 1	Unambiguous	CDK1||CDK2	NP_001777.1||NP_001277159.1	983||1017	cyclin-dependent kinase 1 isoform 1||cyclin-dependent kinase 2 isoform 3	7	2	4502709;589811557	Y10(Phospho)	1	T(5): 0.0; Y(6): 0.5; Y(10): 99.5	1	3364			29030000	Light	Not Unique	Not	0.902	28620000	25190000	2.71			0	49	2	633.295	1265.58	1.42	51.42	12356	12356	CAL27_CURCUMIN_pTy_R1.raw
1	IGEGTyGVVYK	Y6;	Replicate 1	Unambiguous	CDK1||CDK2	NP_001777.1||NP_001277159.1	983||1017	cyclin-dependent kinase 1 isoform 1||cyclin-dependent kinase 2 isoform 3	7	2	4502709;589811557	Y6(Phospho); K11(Label:13C(6))	1	T(5): 0.0; Y(6): 100.0; Y(10): 0.0	1				2015000000		No Quan Values	Not				3.12			0	0	2	636.305	1271.6	1.71	48.89	11678	11678	CAL27_CURCUMIN_pTy_R1.raw
1	IGEGTyGVVYK	Y6;	Replicate 1	Unambiguous	CDK1||CDK2	NP_001777.1||NP_001277159.1	983||1017	cyclin-dependent kinase 1 isoform 1||cyclin-dependent kinase 2 isoform 3	7	2	4502709;589811557	Y6(Phospho); K11(Label:13C(6))	1	T(5): 0.0; Y(6): 100.0; Y(10): 0.0	1	3173			1126000000	Heavy	Redundant	Not	1.095	1550000000	1123000000	2.66			0	45	2	636.305	1271.6	0.56	50.75	12179	12179	CAL27_CURCUMIN_pTy_R1.raw
1	IGEGTyGVVYK	Y6;	Replicate 1	Unambiguous	CDK1||CDK2	NP_001777.1||NP_001277159.1	983||1017	cyclin-dependent kinase 1 isoform 1||cyclin-dependent kinase 2 isoform 3	7	2	4502709;589811557	Y6(Phospho); K11(Label:13C(6))	1	T(5): 0.0; Y(6): 100.0; Y(10): 0.0	1				270200		No Quan Values	Not				1.94			0	84	2	636.305	1271.6	0.75	54.18	13098	13098	CAL27_CURCUMIN_pTy_R1.raw
1	VADLTEQYNEQyGAVR	Y12;	Replicate 1	Unambiguous	RBM14-RBM4	NP_001185774.1	100526737	RBM14-RBM4 protein isoform 1	2	1	311771545	Y12(Phospho)	1	T(5): 0.0; Y(8): 0.0; Y(12): 100.0	1	4035	1		3778000	Light	Excluded by Method	Not	100	1538000	5315	1.95			0	0	2	968.43	1935.85	2	55.45	13434	13434	CAL27_CURCUMIN_pTy_R1.raw
1	LAAVTyNGVDNNK	Y6;	Replicate 1	Unambiguous	42254	NP_001229885.1	989	septin-7 isoform 3	3	1	339639597	Y6(Phospho)	1	T(5): 0.4; Y(6): 99.6	1				1178000		No Quan Values	Not				2.09			0	0	2	729.833	1458.66	-2.58	37.54	8618	8618	CAL27_CURCUMIN_pTy_R1.raw
1	IGEGTyGVVYK	Y6;	Replicate 1	Unambiguous	CDK1||CDK2	NP_001777.1||NP_001277159.1	983||1017	cyclin-dependent kinase 1 isoform 1||cyclin-dependent kinase 2 isoform 3	7	2	4502709;589811557	Y6(Phospho)	1	T(5): 0.4; Y(6): 99.6; Y(10): 0.0	1				1003000000		No Quan Values	Not				3.27			0	35	2	633.295	1265.58	0.74	49.04	11720	11720	CAL27_CURCUMIN_pTy_R1.raw
1	IGEGTyGVVYK	Y6;	Replicate 1	Unambiguous	CDK1||CDK2	NP_001777.1||NP_001277159.1	983||1017	cyclin-dependent kinase 1 isoform 1||cyclin-dependent kinase 2 isoform 3	7	2	4502709;589811557	Y6(Phospho); K11(Label:13C(6))	1	T(5): 0.4; Y(6): 99.6; Y(10): 0.0	1				2015000000		No Quan Values	Not				3.18			0	2	2	636.304	1271.6	-0.31	49.53	11850	11850	CAL27_CURCUMIN_pTy_R1.raw
1	IGEGTyGVVYK	Y6;	Replicate 1	Unambiguous	CDK1||CDK2	NP_001777.1||NP_001277159.1	983||1017	cyclin-dependent kinase 1 isoform 1||cyclin-dependent kinase 2 isoform 3	7	2	4502709;589811557	Y6(Phospho); K11(Label:13C(6))	1	T(5): 0.4; Y(6): 99.6; Y(10): 0.0	1	3173			1126000000	Heavy	Not Unique	Not	1.095	1550000000	1123000000	3.94			0	3	2	636.305	1271.6	0.46	50.09	11999	11999	CAL27_CURCUMIN_pTy_R1.raw
1	IGEGTyGTVFK	Y6;	Replicate 1	Unambiguous	CDK5	NP_001157882.1	1020	cyclin-dependent kinase 5 isoform 2	2	1	256542306	Y6(Phospho)	1	T(5): 0.6; Y(6): 98.8; T(8): 0.6	1	4028			13100000	Light	Unique	Used	1.158	13100000	8975000	2.51			0	42	2	626.286	1251.57	-0.21	55.43	13429	13429	CAL27_CURCUMIN_pTy_R1.raw
2	IGEGtyGVVYK	T5; Y6;	Replicate 1	Unambiguous	CDK1||CDK2	NP_001777.1||NP_001277159.1	983||1017	cyclin-dependent kinase 1 isoform 1||cyclin-dependent kinase 2 isoform 3	7	2	4502709;589811557	T5(Phospho); Y6(Phospho); K11(Label:13C(6))	1	T(5): 100.0; Y(6): 100.0; Y(10): 0.0	1	3195			1273000000	Heavy	Redundant	Not	0.71	1137000000	1271000000	3.29			0	12	2	676.287	1351.57	-0.4	50.25	12042	12042	CAL27_CURCUMIN_pTy_R1.raw
2	IGEGtyGVVYK	T5; Y6;	Replicate 1	Unambiguous	CDK1||CDK2	NP_001777.1||NP_001277159.1	983||1017	cyclin-dependent kinase 1 isoform 1||cyclin-dependent kinase 2 isoform 3	7	2	4502709;589811557	T5(Phospho); Y6(Phospho)	1	T(5): 100.0; Y(6): 100.0; Y(10): 0.0	1	3195			1137000000	Light	Redundant	Not	0.71	1137000000	1271000000	3.55			0	47	2	673.277	1345.55	-0.59	50.3	12058	12058	CAL27_CURCUMIN_pTy_R1.raw
2	IGEGtyGVVYK	T5; Y6;	Replicate 1	Unambiguous	CDK1||CDK2	NP_001777.1||NP_001277159.1	983||1017	cyclin-dependent kinase 1 isoform 1||cyclin-dependent kinase 2 isoform 3	7	2	4502709;589811557	T5(Phospho); Y6(Phospho); K11(Label:13C(6))	1	T(5): 100.0; Y(6): 100.0; Y(10): 0.0	1	3195			1273000000	Heavy	Redundant	Not	0.71	1137000000	1271000000	3.93			0	2	2	676.288	1351.57	0.15	50.86	12208	12208	CAL27_CURCUMIN_pTy_R1.raw
2	IGEGtyGVVYK	T5; Y6;	Replicate 1	Unambiguous	CDK1||CDK2	NP_001777.1||NP_001277159.1	983||1017	cyclin-dependent kinase 1 isoform 1||cyclin-dependent kinase 2 isoform 3	7	2	4502709;589811557	T5(Phospho); Y6(Phospho)	1	T(5): 100.0; Y(6): 100.0; Y(10): 0.0	1	3195			1137000000	Light	Not Unique	Not	0.71	1137000000	1271000000	4.03			0	1	2	673.279	1345.55	2.22	50.87	12209	12209	CAL27_CURCUMIN_pTy_R1.raw
2	IGEGtyGVVYK	T5; Y6;	Replicate 1	Unambiguous	CDK1||CDK2	NP_001777.1||NP_001277159.1	983||1017	cyclin-dependent kinase 1 isoform 1||cyclin-dependent kinase 2 isoform 3	7	2	4502709;589811557	T5(Phospho); Y6(Phospho); K11(Label:13C(6))	1	T(5): 100.0; Y(6): 100.0; Y(10): 0.0	1	3195			1273000000	Heavy	Redundant	Not	0.71	1137000000	1271000000	3.26			0	2	2	676.288	1351.57	-0.03	51.4	12353	12353	CAL27_CURCUMIN_pTy_R1.raw
2	IGEGtyGVVYK	T5; Y6;	Replicate 1	Unambiguous	CDK1||CDK2	NP_001777.1||NP_001277159.1	983||1017	cyclin-dependent kinase 1 isoform 1||cyclin-dependent kinase 2 isoform 3	7	2	4502709;589811557	T5(Phospho); Y6(Phospho)	1	T(5): 100.0; Y(6): 100.0; Y(10): 0.0	1	3195			1137000000	Light	Redundant	Not	0.71	1137000000	1271000000	3.72			0	10	2	673.277	1345.55	-0.32	51.41	12354	12354	CAL27_CURCUMIN_pTy_R1.raw
2	IGEGtyGVVYK	T5; Y6;	Replicate 1	Unambiguous	CDK1||CDK2	NP_001777.1||NP_001277159.1	983||1017	cyclin-dependent kinase 1 isoform 1||cyclin-dependent kinase 2 isoform 3	7	2	4502709;589811557	T5(Phospho); Y6(Phospho); K11(Label:13C(6))	1	T(5): 100.0; Y(6): 100.0; Y(10): 0.0	1	3195			1273000000	Heavy	Redundant	Not	0.71	1137000000	1271000000	3.06			0	49	2	676.288	1351.57	0.6	52.05	12527	12527	CAL27_CURCUMIN_pTy_R1.raw
2	IGEGtyGVVYK	T5; Y6;	Replicate 1	Unambiguous	CDK1||CDK2	NP_001777.1||NP_001277159.1	983||1017	cyclin-dependent kinase 1 isoform 1||cyclin-dependent kinase 2 isoform 3	7	2	4502709;589811557	T5(Phospho); Y6(Phospho)	1	T(5): 100.0; Y(6): 100.0; Y(10): 0.0	1	3195			1137000000	Light	Redundant	Not	0.71	1137000000	1271000000	1.99			0	73	2	673.277	1345.55	-1.31	52.13	12547	12547	CAL27_CURCUMIN_pTy_R1.raw
1	VIQAQTAFSANPANPAILSEASAPIPHDGNLyPR	Y32;	Replicate 1	Unambiguous	SDCBP	NP_001007070.1	6386	syntenin-1 isoform 3	2	1	55749515	Y32(Phospho)	1	T(6): 0.0; S(9): 0.0; S(19): 0.0; S(22): 0.0; Y(32): 100.0	1	11240			79010000	Light	Unique	Used	1.182	79010000	53060000	5.85			0	0	3	1204.26	3610.77	-0.41	100.36	25443	25443	CAL27_CURCUMIN_pTy_R1.raw
1	VIQAQTAFSANPANPAILSEASAPIPHDGNLyPR	Y32;	Replicate 1	Unambiguous	SDCBP	NP_001007070.1	6386	syntenin-1 isoform 3	2	1	55749515	Y32(Phospho); R34(Label:13C(6))	1	T(6): 0.0; S(9): 0.0; S(19): 0.0; S(22): 0.0; Y(32): 100.0	1	11240			53060000	Heavy	Redundant	Not	1.182	79010000	53060000	5.55			0	79	3	1206.27	3616.79	-0.61	100.39	25451	25451	CAL27_CURCUMIN_pTy_R1.raw
1	RPGPGTLyDVPR	Y8;	Replicate 1	Unambiguous	BCAR1	NP_001164190.1	9564	breast cancer anti-estrogen resistance protein 1 isoform 7	9	1	282398123	R1(Label:13C(6)); Y8(Phospho); R12(Label:13C(6))	1	T(6): 0.0; Y(8): 100.0	1	3378			43110000	Heavy	Redundant	Not	1.55	84180000	43110000	3.76			0	27	3	473.911	1419.72	-0.3	51.42	12357	12357	CAL27_CURCUMIN_pTy_R1.raw
1	RPGPGTLyDVPR	Y8;	Replicate 1	Unambiguous	BCAR1	NP_001164190.1	9564	breast cancer anti-estrogen resistance protein 1 isoform 7	9	1	282398123	Y8(Phospho)	1	T(6): 0.0; Y(8): 100.0	1	3378			84860000	Light	Unique	Used	1.55	84180000	43110000	4.94			0	25	3	469.898	1407.68	0.07	51.42	12358	12358	CAL27_CURCUMIN_pTy_R1.raw
1	RPGPGTLyDVPR	Y8;	Replicate 1	Unambiguous	BCAR1	NP_001164190.1	9564	breast cancer anti-estrogen resistance protein 1 isoform 7	9	1	282398123	R1(Label:13C(6)); Y8(Phospho); R12(Label:13C(6))	1	T(6): 0.0; Y(8): 100.0	1	3361			103900000	Heavy	Redundant	Not	1.584	207500000	103900000	3.41			0	13	2	710.363	1419.72	0.48	51.46	12368	12368	CAL27_CURCUMIN_pTy_R1.raw
1	RPGPGTLyDVPR	Y8;	Replicate 1	Unambiguous	BCAR1	NP_001164190.1	9564	breast cancer anti-estrogen resistance protein 1 isoform 7	9	1	282398123	Y8(Phospho)	1	T(6): 0.0; Y(8): 100.0	1	3361			208700000	Light	Unique	Used	1.584	207500000	103900000	3.65			0	1	2	704.343	1407.68	0.38	51.89	12485	12485	CAL27_CURCUMIN_pTy_R1.raw
1	RPGPGTLyDVPR	Y8;	Replicate 1	Unambiguous	BCAR1	NP_001164190.1	9564	breast cancer anti-estrogen resistance protein 1 isoform 7	9	1	282398123	Y8(Phospho)	1	T(6): 0.0; Y(8): 100.0	1	3378			84860000	Light	Redundant	Not	1.55	84180000	43110000	4.18			0	10	3	469.898	1407.68	0	52.04	12524	12524	CAL27_CURCUMIN_pTy_R1.raw
1	RPGPGtLYDVPR	T6;	Replicate 1	Unambiguous	BCAR1	NP_001164190.1	9564	breast cancer anti-estrogen resistance protein 1 isoform 7	9	1	282398123	Y8(Phospho)	1	T(6): 99.6; Y(8): 0.4	1	3361			208700000	Light	Redundant	Not	1.584	207500000	103900000	3.12			0	12	2	704.343	1407.68	0.64	51.3	12325	12325	CAL27_CURCUMIN_pTy_R1.raw
1	QLQQAVTGISNAAQATASDDASQHQGGGGGELAyALNNFDK	Y34;	Replicate 1	Unambiguous	CTNNA1	NP_001277236.1	1495	catenin alpha-1 isoform 2	4	1	594140506	Y34(Phospho)	1	T(7): 0.0; S(10): 0.0; T(16): 0.0; S(18): 0.0; S(22): 0.0; Y(34): 100.0	1				730700		No Quan Values	Not				5.02			0	84	3	1395.3	4183.89	-1.57	108.9	27737	27737	CAL27_CURCUMIN_pTy_R1.raw
1	GGNRPNTGPLyTEADR	Y11;	Replicate 1	Unambiguous	PLEKHA5	NP_001243716.1	54477	pleckstrin homology domain-containing family A member 5 isoform 5	4	1	377652346	Y11(Phospho)	1	T(7): 0.0; Y(11): 99.1; T(12): 0.9	1	1653			5596000	Light	Unique	Used	5.429	4914000	718200	3.11			0	53	3	599.935	1797.79	-0.06	40.19	9336	9336	CAL27_CURCUMIN_pTy_R1.raw
1	GGAFDGTMNGPFGHGyGEGAGEGIDDVEWVVGK	Y16;	Replicate 1	Unambiguous	EHD1	NP_001269373.1	10938	EH domain-containing protein 1 isoform 1	2	1	540344515	Y16(Phospho)	1	T(7): 0.0; Y(16): 100.0	1	13600	1		5314000	Light	Excluded by Method	Not	100	1824000	5315	4.37			0	62	3	1121.47	3362.41	-0.16	114.74	29305	29305	CAL27_CURCUMIN_pTy_R1.raw
1	HADAEMTGyVVTR	Y9;	Replicate 1	Unambiguous	MAPK13	NP_002745.1	5603	mitogen-activated protein kinase 13	1	1	4506085	Y9(Phospho)	1	T(7): 0.0; Y(9): 100.0; T(12): 0.0	1	2051			41320000	Light	Unique	Used	2.051	41100000	15900000	4.66			0	26	3	510.553	1529.64	-0.72	42.81	10040	10040	CAL27_CURCUMIN_pTy_R1.raw
1	HADAEMTGyVVTR	Y9;	Replicate 1	Unambiguous	MAPK13	NP_002745.1	5603	mitogen-activated protein kinase 13	1	1	4506085	Y9(Phospho); R13(Label:13C(6))	1	T(7): 0.0; Y(9): 100.0; T(12): 0.0	1	2051			15900000	Heavy	Redundant	Not	2.051	41100000	15900000	3.49			0	30	3	512.56	1535.66	-0.71	42.83	10044	10044	CAL27_CURCUMIN_pTy_R1.raw
1	HADAEMTGyVVTR	Y9;	Replicate 1	Unambiguous	MAPK13	NP_002745.1	5603	mitogen-activated protein kinase 13	1	1	4506085	Y9(Phospho)	1	T(7): 0.0; Y(9): 100.0; T(12): 0.0	1	2064			86480000	Light	Unique	Used	1.83	85450000	37050000	4.32			0	10	2	765.327	1529.65	0.29	42.9	10064	10064	CAL27_CURCUMIN_pTy_R1.raw
1	HADAEMTGyVVTR	Y9;	Replicate 1	Unambiguous	MAPK13	NP_002745.1	5603	mitogen-activated protein kinase 13	1	1	4506085	M6(Oxidation); Y9(Phospho)	1	T(7): 0.0; Y(9): 100.0; T(12): 0.0	1	2114			2346000	Light	Unique	Used	1.977	2346000	941600	3.24			0	67	3	515.885	1545.64	-0.42	43.19	10142	10142	CAL27_CURCUMIN_pTy_R1.raw
1	QADEEMTGyVATR	Y9;	Replicate 1	Unambiguous	MAPK11	NP_002742.3	5600	mitogen-activated protein kinase 11	1	1	20128774	Y9(Phospho)	1	T(7): 0.0; Y(9): 99.4; T(12): 0.6	1	1759			32020000	Light	Redundant	Not	2.543	30530000	9527000	3.52			0	11	2	775.814	1550.62	0.3	40.89	9528	9528	CAL27_CURCUMIN_pTy_R1.raw
1	QADEEMTGyVATR	Y9;	Replicate 1	Unambiguous	MAPK11	NP_002742.3	5600	mitogen-activated protein kinase 11	1	1	20128774	Y9(Phospho)	1	T(7): 0.0; Y(9): 99.5; T(12): 0.5	1	1759			32020000	Light	Unique	Used	2.543	30530000	9527000	3.65			0	0	2	775.814	1550.62	0.69	41.45	9675	9675	CAL27_CURCUMIN_pTy_R1.raw
1	HVHLENATEyATLR	Y10;	Replicate 1	Unambiguous	C11orf52	NP_542390.2	91894	uncharacterized protein C11orf52	1	1	131889517	Y10(Phospho); R14(Label:13C(6))	1	T(8): 0.0; Y(10): 99.6; T(12): 0.4	1	3688			4922000	Heavy	Unique	Used	0.314	1704000	4307000	3.2			0	35	3	580.612	1739.82	-0.29	53.3	12859	12859	CAL27_CURCUMIN_pTy_R1.raw
1	EKAEERPTFDYLQSVLDDFYTATEGQyQQQP	Y27;	Replicate 1	Unambiguous	LYN	NP_001104567.1	4067	tyrosine-protein kinase Lyn isoform B	2	1	162287326	K2(Label:13C(6)); R6(Label:13C(6)); Y27(Phospho)	1	T(8): 0.0; Y(11): 0.0; S(14): 0.0; Y(20): 0.0; T(21): 0.0; T(23): 0.0; Y(27): 99.9	1	16343			532200000	Heavy	Redundant	Not	0.888	595500000	532200000	3.62			1	0	3	1263.57	3788.7	-0.75	130.93	33649	33649	CAL27_CURCUMIN_pTy_R1.raw
1	EKAEERPTFDYLQSVLDDFYTATEGQyQQQP	Y27;	Replicate 1	Unambiguous	LYN	NP_001104567.1	4067	tyrosine-protein kinase Lyn isoform B	2	1	162287326	Y27(Phospho)	1	T(8): 0.0; Y(11): 0.0; S(14): 0.0; Y(20): 0.0; T(21): 0.0; T(23): 1.5; Y(27): 98.5	1	16343			611000000	Light	Unique	Used	0.888	595500000	532200000	7.46			1	6	3	1259.56	3776.66	-0.95	131.01	33669	33669	CAL27_CURCUMIN_pTy_R1.raw
1	EKAEERPTFDYLQSVLDDFYTATEGQyQQQP	Y27;	Replicate 1	Unambiguous	LYN	NP_001104567.1	4067	tyrosine-protein kinase Lyn isoform B	2	1	162287326	K2(Label:13C(6)); R6(Label:13C(6)); Y27(Phospho)	1	T(8): 0.0; Y(11): 0.0; S(14): 0.0; Y(20): 0.0; T(21): 0.0; T(23): 1.7; Y(27): 98.3	1	16370			69740000	Heavy	Unique	Used	0.909	79920000	69740000	5.25			1	15	4	947.933	3788.71	1.52	131.1	33694	33694	CAL27_CURCUMIN_pTy_R1.raw
1	EKAEERPTFDYLQSVLDDFYtATEGQYQQQP	T21;	Replicate 1	Unambiguous	LYN	NP_001104567.1	4067	tyrosine-protein kinase Lyn isoform B	2	1	162287326	T23(Phospho)	1	T(8): 0.0; Y(11): 0.0; S(14): 0.0; Y(20): 1.4; T(21): 97.3; T(23): 1.4; Y(27): 0.0	1	16370			82480000	Light	Redundant	Not	0.909	79920000	69740000	4.99			1	19	4	944.922	3776.67	0.93	131.1	33693	33693	CAL27_CURCUMIN_pTy_R1.raw
1	DPHLLDPTVEyVK	Y11;	Replicate 1	Unambiguous	BCAR3	NP_001248338.1	8412	breast cancer anti-estrogen resistance protein 3 isoform 1	1	1	387157909	Y11(Phospho)	1	T(8): 0.0; Y(11): 100.0	1	6183			11420000	Light	Unique	Used	1.521	11140000	5813000	1.88			0	26	2	803.383	1605.76	1.65	68.15	16829	16829	CAL27_CURCUMIN_pTy_R1.raw
1	IADPEHDHTGFLTEYVAtR	T18;	Replicate 1	Unambiguous	MAPK3	NP_001103361.1	5595	mitogen-activated protein kinase 3 isoform 3	3	1	158138507	T18(Phospho)	1	T(9): 0.0; T(13): 0.0; Y(15): 0.9; T(18): 99.1	1						No Quan Values	Not				2.43			0	0	3	751.339	2252	0.74	67.08	16541	16541	CAL27_CURCUMIN_pTy_R1.raw
1	VADPDHDHTGFLTEyVATR	Y15;	Replicate 1	Unambiguous	MAPK1	NP_620407.1	5594	mitogen-activated protein kinase 1	1	1	20986531	Y15(Phospho)	1	T(9): 0.0; T(13): 0.0; Y(15): 100.0; T(18): 0.0	1	5448			96200000	Light	Redundant	Not	0.917	87750000	75960000	4.28			0	25	4	556.748	2223.97	0.16	63.79	15657	15657	CAL27_CURCUMIN_pTy_R1.raw
1	VADPDHDHTGFLTEyVATR	Y15;	Replicate 1	Unambiguous	MAPK1	NP_620407.1	5594	mitogen-activated protein kinase 1	1	1	20986531	Y15(Phospho); R19(Label:13C(6))	1	T(9): 0.0; T(13): 0.0; Y(15): 100.0; T(18): 0.0	1	5448			75960000	Heavy	Redundant	Not	0.917	87750000	75960000	5.22			0	15	4	558.253	2229.99	-0.44	63.83	15669	15669	CAL27_CURCUMIN_pTy_R1.raw
1	VADPDHDHTGFLTEyVATR	Y15;	Replicate 1	Unambiguous	MAPK1	NP_620407.1	5594	mitogen-activated protein kinase 1	1	1	20986531	Y15(Phospho)	1	T(9): 0.0; T(13): 0.0; Y(15): 100.0; T(18): 0.0	1	5448			96200000	Light	Unique	Used	0.917	87750000	75960000	5.27			0	3	4	556.748	2223.97	0.16	64.35	15809	15809	CAL27_CURCUMIN_pTy_R1.raw
1	VADPDHDHTGFLTEyVATR	Y15;	Replicate 1	Unambiguous	MAPK1	NP_620407.1	5594	mitogen-activated protein kinase 1	1	1	20986531	Y15(Phospho); R19(Label:13C(6))	1	T(9): 0.0; T(13): 0.0; Y(15): 100.0; T(18): 0.0	1	5448			75960000	Heavy	Redundant	Not	0.917	87750000	75960000	4.38			0	13	4	558.253	2229.99	-0.55	64.45	15836	15836	CAL27_CURCUMIN_pTy_R1.raw
1	VADPDHDHTGFLTEyVATR	Y15;	Replicate 1	Unambiguous	MAPK1	NP_620407.1	5594	mitogen-activated protein kinase 1	1	1	20986531	Y15(Phospho)	1	T(9): 0.0; T(13): 0.0; Y(15): 100.0; T(18): 0.0	1	5508			108100000	Light	Unique	Used	0.608	108100000	141100000	7.82			0	5	3	741.996	2223.97	1.18	64.59	15873	15873	CAL27_CURCUMIN_pTy_R1.raw
1	IADPEHDHTGFLTEyVATR	Y15;	Replicate 1	Unambiguous	MAPK3	NP_001103361.1	5595	mitogen-activated protein kinase 3 isoform 3	3	1	158138507	Y15(Phospho); R19(Label:13C(6))	1	T(9): 0.0; T(13): 0.0; Y(15): 100.0; T(18): 0.0	1	6016	1		540500000	Heavy	Excluded by Method	Not	0.01	5315	175900000	4.21			0	20	3	753.346	2258.02	0.99	67.14	16557	16557	CAL27_CURCUMIN_pTy_R1.raw
1	IADPEHDHTGFLTEyVATR	Y15;	Replicate 1	Unambiguous	MAPK3	NP_001103361.1	5595	mitogen-activated protein kinase 3 isoform 3	3	1	158138507	Y15(Phospho); R19(Label:13C(6))	1	T(9): 0.0; T(13): 0.0; Y(15): 100.0; T(18): 0.0	1	6016	1		540500000	Heavy	Excluded by Method	Not	0.01	5315	175900000	4.8			0	2	3	753.346	2258.02	0.5	68.05	16800	16800	CAL27_CURCUMIN_pTy_R1.raw
1	IADPEHDHTGFLTEyVATR	Y15;	Replicate 1	Unambiguous	MAPK3	NP_001103361.1	5595	mitogen-activated protein kinase 3 isoform 3	3	1	158138507	Y15(Phospho)	1	T(9): 0.0; T(13): 0.0; Y(15): 100.0; T(18): 0.0	1						No Quan Values	Not				4.06			0	0	3	751.338	2252	-1.13	68.23	16849	16849	CAL27_CURCUMIN_pTy_R1.raw
[truncated: 4,226 more rows]

## Sheet: Sheet1
Protein Description
[truncated: 5,368 more rows]
